# Supplementary material for: De-epimerizing DyKAT of β-lactones generated by isothiourea-catalysed enantioselective [2 + 2] cycloaddition
Source: Royal Society of Chemistry journal article supplement (doi:10.1039/d4sc01410c), 2024-01-01
Supplement: d4sc01410c1.pdf [file d4sc01410c1.pdf]

## De-epimerizing DyKAT of $\beta$ -Lactones Generated by Isothiourea-Catalysed Enantioselective [2+2]-Cycloaddition

Aífe Conboy, Alister S. Goodfellow, Kevin Kasten, Joanne Dunne, David B. Cordes, Michael Bühl,\*  
Andrew D. Smith\*

EaStCHEM, School of Chemistry, University of St Andrews, St Andrews, Fife,  
KY16 9ST, UK.

E-mail: [ads10@st-andrews.ac.uk](mailto:ads10@st-andrews.ac.uk); [buehl@st-andrews.ac.uk](mailto:buehl@st-andrews.ac.uk)

### Contents

|                                                                                                              |    |
|--------------------------------------------------------------------------------------------------------------|----|
| <b>1. General experimental</b> .....                                                                         | 5  |
| <b>2. Reaction Optimisation</b> .....                                                                        | 7  |
| <b>1. Synthesis of Homoanhydrides</b> .....                                                                  | 8  |
| 1.1. 2-Phenylacetic Anhydride <b>S1</b> .....                                                                | 8  |
| 1.2. 2-( $\alpha$ -Naphthyl)acetic Anhydride <b>S2</b> .....                                                 | 8  |
| 1.3. 2-( <i>p</i> -Chlorophenyl)acetic Anhydride <b>S3</b> .....                                             | 8  |
| 1.4. 2-( <i>p</i> -Bromophenyl)acetic Anhydride <b>S4</b> .....                                              | 9  |
| 1.5. 2-( <i>p</i> -Tolyl)acetic Anhydride <b>S5</b> .....                                                    | 9  |
| 1.6. 2-( <i>p</i> -Anisyl)acetic Anhydride <b>S6</b> .....                                                   | 9  |
| 1.7. 2-( <i>m</i> -Bromophenyl)acetic Anhydride <b>S7</b> .....                                              | 10 |
| 1.8. 2-( <i>o</i> -Tolyl)acetic Anhydride <b>S8</b> .....                                                    | 10 |
| 1.9. 2-( <i>N</i> -Methylindol-3-yl)acetic Anhydride <b>S9</b> .....                                         | 10 |
| 1.10. 2-(Thiophen-3-yl)acetic Anhydride <b>S10</b> .....                                                     | 11 |
| 1.11. ( <i>E</i> )-5-Methylhex-3-enioic Anhydride <b>S11</b> .....                                           | 11 |
| <b>2. Synthesis of Pyrazol-3-ones</b> .....                                                                  | 12 |
| 2.1. 5-Methyl-2-phenyl-2,4-dihydro-3 <i>H</i> -pyrazol-3-one <b>S12</b> .....                                | 12 |
| 2.2. 5-Isopropyl-2-phenyl-2,4-dihydro-3 <i>H</i> -pyrazol-3-one <b>S13</b> .....                             | 12 |
| 2.3. 2,5-Diphenyl-2,4-dihydro-3 <i>H</i> -pyrazol-3-one <b>S14</b> .....                                     | 12 |
| 2.4. 2-( <i>tert</i> -Butyl)-5-methyl-2,4-dihydro-3 <i>H</i> -pyrazol-3-one <b>S15</b> .....                 | 13 |
| 2.5. 2-( <i>p</i> -Anisyl)-5-methyl-2,4-dihydro-3 <i>H</i> -pyrazole-3-one <b>S16</b> .....                  | 13 |
| 2.6. 5-Methyl-2-(4-(trifluoromethyl)phenyl)-2,4-dihydro-3 <i>H</i> -pyrazol-3-one <b>S17</b> .....           | 14 |
| <b>3. Synthesis of Pyrazol-3-one-derived ketimines</b> .....                                                 | 14 |
| 3.1. 5-Methyl-2-phenyl-4-(phenylimino)-2,4-dihydro-3 <i>H</i> -pyrazol-3-one <b>S18</b> .....                | 14 |
| 3.2. 5-Isopropyl-2-phenyl-4-(phenylimino)-2,4-dihydro-3 <i>H</i> -pyrazol-3-one <b>S19</b> .....             | 15 |
| 3.3. 2,5-Diphenyl-4-(phenylimino)-2,4-dihydro-3 <i>H</i> -pyrazol-3-one <b>S20</b> .....                     | 15 |
| 3.4. 2-( <i>tert</i> -Butyl)-5-methyl-4-(phenylimino)-2,4-dihydro-3 <i>H</i> -pyrazol-3-one <b>S21</b> ..... | 16 |

|                                                                                                                                                                                                                                                |    |
|------------------------------------------------------------------------------------------------------------------------------------------------------------------------------------------------------------------------------------------------|----|
| <b>4. Synthesis of Pyrazole-4,5-diones</b> .....                                                                                                                                                                                               | 17 |
| 4.1. 3-Methyl-1-phenyl-1 <i>H</i> -pyrazole-4,5-dione <b>S22</b> .....                                                                                                                                                                         | 17 |
| 4.2. 3-Isopropyl-1-phenyl-1 <i>H</i> -pyrazole-4,5-dione <b>S23</b> .....                                                                                                                                                                      | 17 |
| 4.3. 1,3-Diphenyl-1 <i>H</i> -pyrazole-4,5-dione <b>S24</b> .....                                                                                                                                                                              | 18 |
| 4.4. 1-( <i>tert</i> -Butyl)-3-methyl-1 <i>H</i> -pyrazole-4,5-dione <b>S25</b> .....                                                                                                                                                          | 18 |
| 4.5. 1-( <i>p</i> -Anisyl)-3-methyl-1 <i>H</i> -pyrazole-4,5-dione <b>S26</b> .....                                                                                                                                                            | 19 |
| 4.6. 3-Methyl-1-( <i>p</i> -(trifluoromethyl)phenyl)-1 <i>H</i> -pyrazole-4,5-dione <b>S27</b> .....                                                                                                                                           | 20 |
| <b>5. Isothiourea-catalysed formal [2+2] cycloaddition of homoanhydrides and pyrazole-4,5-diones</b>                                                                                                                                           |    |
| 21                                                                                                                                                                                                                                             |    |
| 5.1. <i>N</i> -Benzyl (2' <i>R</i> ,4 <i>R</i> )-2-(4-hydroxy-3-methyl-5-oxo-1-phenyl-4,5-dihydro-1 <i>H</i> -pyrazol-4-yl)-2-phenylacetamide <b>9</b> .....                                                                                   | 21 |
| 5.2. (1' <i>R</i> ,4 <i>R</i> )- and (1' <i>S</i> ,4 <i>R</i> )-4-hydroxy-5-methyl-4-(2-oxo-1-phenyl-2-(pyrrolidine-1-yl)ethyl)-1-phenyl-2,4-dihydro-3 <i>H</i> -pyrazol-3-one <b>10</b> .....                                                 | 24 |
| 5.3. (1' <i>R</i> ,4 <i>R</i> )- and (1' <i>S</i> ,4 <i>R</i> )-4-Hydroxy-5-methyl-4-(2-morpholino-2-oxo-1-phenylethyl)-2-phenyl-2,4-dihydro-3 <i>H</i> -pyrazol-3-one <b>11</b> .....                                                         | 27 |
| 5.4. (3' <i>R</i> ,4 <i>R</i> )-3-Methyl-3'-(naphth-1-yl)-1-phenyl-spiro[pyrazolin[5]one-4.2-oxetan[4]one] <b>12</b> and (3' <i>S</i> ,4 <i>R</i> )-3-Methyl-3'-(naphth-1-yl)-1-phenyl-spiro[pyrazolin[5]one-4.2-oxetan[4]one] <b>13</b> ..... | 30 |
| 5.5. (1' <i>R</i> ,4 <i>R</i> )- and (1' <i>S</i> ,4 <i>R</i> )-4-hydroxy-5-methyl-4-(2-morpholino-1-( $\alpha$ -naphthyl)-2-oxoethyl)-2-phenyl-2,4-dihydro-3 <i>H</i> -pyrazol-3-one <b>14</b> .....                                          | 36 |
| 5.6. (1' <i>R</i> ,4 <i>R</i> )- and (1' <i>S</i> ,4 <i>R</i> )-4-(1-( <i>p</i> -chlorophenyl)2-morpholino-2-oxoethyl)-4-hydroxy-5-methyl-2-phenyl-2,4-dihydro-3 <i>H</i> -pyrazol-3-one <b>21</b> .....                                       | 39 |
| 5.7. (1' <i>R</i> ,4 <i>R</i> )- and (1' <i>S</i> ,4 <i>R</i> )-4-(1-(4-bromophenyl)-2-morpholino-2-oxoethyl)-4-hydroxy-5-methyl-2-phenyl-2,4-dihydro-3 <i>H</i> -pyrazole-3-one <b>22</b> .....                                               | 42 |
| 5.8. (1' <i>R</i> ,4 <i>R</i> )- and (1' <i>S</i> ,4 <i>R</i> )-4-hydroxy-5-methyl-4-(2-morpholine-2-oxo-1-( <i>p</i> -tolyl)ethyl)-2-phenyl-2,4-dihydro-3 <i>H</i> -pyrazol-3-one <b>23</b> .....                                             | 45 |
| 5.9. (1' <i>R</i> ,4 <i>R</i> )-4-(1-( <i>p</i> -anisyl)-2-morpholine-2-oxoethyl)-4-hydroxy-5-methyl-2-phenyl-2,4-dihydro-3 <i>H</i> -pyrazol-3-one <b>24</b> .....                                                                            | 48 |
| 5.10. (1' <i>R</i> ,4 <i>R</i> )- and (1' <i>S</i> ,4 <i>R</i> )-4-(1-( <i>m</i> -bromophenyl)-2-morpholine-2-oxoethyl)-4-hydroxy-5-methyl-2-phenyl-2,4-dihydro-3 <i>H</i> -pyrazol-3-one <b>25</b> .....                                      | 51 |
| 5.11. (1' <i>R</i> ,4 <i>R</i> )- and (1' <i>S</i> ,4 <i>R</i> )-4-hydroxy-5-methyl-4-(2-morpholino-2-oxo-1-( <i>o</i> -tolyl)ethyl)-2-phenyl-2,4-dihydro-3 <i>H</i> -pyrazol-3-one <b>26</b> .....                                            | 54 |
| 5.12. (1' <i>R</i> ,4 <i>R</i> )-4-hydroxy-5-methyl-4-(1-(1-methyl-1 <i>H</i> -indol-3-yl)-2-morpholino-2-oxoethyl)-2-phenyl-2,4-dihydro-3 <i>H</i> -pyrazol-3-one <b>27</b> .....                                                             | 57 |
| 5.13. (1' <i>R</i> ,4 <i>R</i> )- and (1' <i>S</i> ,4 <i>R</i> )-4-hydroxy-5-methyl-4-(2-morpholino-2-oxo-1-thiophen-2-ylethyl)-2-phenyl-2,4-dihydro-3 <i>H</i> -pyrazol-3-one <b>28</b> .....                                                 | 60 |
| 5.14. (2' <i>R</i> ,4 <i>R</i> )- and (2' <i>S</i> ,4 <i>R</i> )-( <i>E</i> )-4-hydroxy-5-methyl-4-(5-methyl-1-morpholino-1-oxohex-3-en-2-yl)-2-phenyl-2,4-dihydro-3 <i>H</i> -pyrazol-3-one <b>29</b> .....                                   | 62 |
| 5.15. (1' <i>R</i> ,4 <i>R</i> )- and (1' <i>S</i> ,4 <i>R</i> )-4-Hydroxy-5-isopropyl-4-(2-morpholino-2-oxo-1-phenylethyl)-2-phenyl-2,4-dihydro-3 <i>H</i> -pyrazol-3-one <b>30</b> .....                                                     | 65 |

|           |                                                                                                                                                                                                                      |            |
|-----------|----------------------------------------------------------------------------------------------------------------------------------------------------------------------------------------------------------------------|------------|
| 5.16.     | (1' <i>R</i> ,4 <i>R</i> )- and (1' <i>S</i> ,4 <i>R</i> )-4-Hydroxy-5-isopropyl-4-(2-morpholino-1-(naphth-1-yl)-2-oxoethyl)-2-phenyl-2,4-dihydro-3 <i>H</i> -pyrazol-3-one <b>31</b> .....                          | 69         |
| 5.17.     | (1' <i>R</i> ,4 <i>R</i> )- and (1' <i>S</i> ,4 <i>R</i> )-4-Hydroxy-4-(2-morpholino-2-oxo-1-phenylethyl)-2,5-diphenyl-2,4-dihydro-3 <i>H</i> -pyrazol-3-one <b>32</b> .....                                         | 73         |
| 5.18.     | (1' <i>R</i> ,4 <i>R</i> )- and (1' <i>S</i> ,4 <i>R</i> )-4-Hydroxy-4-(2-morpholino-1-(naphth-1-yl)-2-oxoethyl)-2,5-diphenyl-2,4-dihydro-3 <i>H</i> -pyrazol-3-one <b>33</b> .....                                  | 76         |
| 5.19.     | (1' <i>R</i> ,4 <i>R</i> )- and (1' <i>S</i> ,4 <i>R</i> )-2-( <i>tert</i> -Butyl)-4-hydroxy-5-methyl-4-(2-morpholino-2-oxo-1-phenylethyl)-2,4-dihydro-3 <i>H</i> -pyrazol-3-one <b>34</b> .....                     | 79         |
| 5.20.     | (1' <i>R</i> ,4 <i>R</i> )- and (1' <i>S</i> ,4 <i>R</i> )-2-( <i>tert</i> -Butyl)-4-hydroxy-5-methyl-4-(2-morpholino-1-(naphth-1-yl)-2-oxoethyl)-2,4-dihydro-3 <i>H</i> -pyrazol-3-one <b>35</b> .....              | 82         |
| 5.21.     | (1' <i>R</i> ,4 <i>R</i> )- and (1' <i>S</i> ,4 <i>R</i> )-2-( <i>p</i> -Anisyl)-4-hydroxy-5-methyl-4-(2-morpholino-1-(naphth-1-yl)-2-oxoethyl)-2,4-dihydro-3 <i>H</i> -pyrazol-3-one <b>36</b> .....                | 85         |
| 5.22.     | (1' <i>R</i> ,4 <i>R</i> )- and (1' <i>S</i> ,4 <i>R</i> )-2-( <i>p</i> -Anisyl)-4-hydroxy-5-methyl-4-(2-morpholino-2-oxo-1-phenylethyl)-2,4-dihydro-3 <i>H</i> -pyrazol-3-one <b>37</b> .....                       | 88         |
| 5.23.     | (1' <i>R</i> ,4 <i>R</i> )- and (1' <i>S</i> ,4 <i>R</i> )-4-hydroxy-5-methyl-4-(2-morpholino-1-(naphth-1-yl)-2-oxoethyl)-2-( <i>p</i> -trifluoromethylphenyl)-2,4-dihydro-3 <i>H</i> -pyrazol-3-one <b>38</b> ..... | 91         |
| 5.24.     | (1' <i>R</i> ,4 <i>R</i> )- and (1' <i>S</i> ,4 <i>R</i> )-2-(4-Hydroxy-3-methyl-5-oxo-1-phenyl-4,5-dihydro-1 <i>H</i> -pyrazol-4-yl)-2-phenylacetate <b>39</b> .....                                                | 95         |
| 5.25.     | <i>iso</i> -Propyl (2 <i>R</i> )-2-((4 <i>R</i> )-4-Hydroxy-3-methyl-5-oxo-1-phenyl-4,5-dihydro-1 <i>H</i> -pyrazol-4-yl)-2-phenylacetate <b>40</b> .....                                                            | 98         |
| 5.26.     | (1' <i>R</i> ,4 <i>R</i> )- and (1' <i>S</i> ,4 <i>R</i> )-2-(4-Hydroxy-3-methyl-5-oxo-1-phenyl-4,5-dihydro-1 <i>H</i> -pyrazol-4-yl)-2-(naphth-1-yl)-acetate <b>41</b> .....                                        | 103        |
| <b>6.</b> | <b>Epimerisation Experiments</b> .....                                                                                                                                                                               | <b>114</b> |
| 6.1.      | Epimerisation of Amide <b>14</b> .....                                                                                                                                                                               | 114        |
| 6.2.      | Epimerisation of Lactone <b>13</b> .....                                                                                                                                                                             | 114        |
| <b>7.</b> | <b>Crystallographic Data</b> .....                                                                                                                                                                                   | <b>117</b> |
| <b>8.</b> | <b>Computation</b> .....                                                                                                                                                                                             | <b>124</b> |
| 8.1.      | Computational details.....                                                                                                                                                                                           | 124        |
| 8.2.      | Interaction and Reorganisation Energies.....                                                                                                                                                                         | 124        |
| 8.3.      | Computational Discussion.....                                                                                                                                                                                        | 125        |
| 8.4.      | Treatment of Low-Lying Vibrational Frequencies .....                                                                                                                                                                 | 125        |
| 8.5.      | Computational Data.....                                                                                                                                                                                              | 126        |
| <b>9.</b> | <b>References</b> .....                                                                                                                                                                                              | <b>133</b> |



## 1. General experimental

Reactions involving moisture sensitive reagents were carried out in flame-dried glassware under an inert atmosphere (Ar or N<sub>2</sub>) using standard vacuum line techniques. Anhydrous solvents (Et<sub>2</sub>O, CH<sub>2</sub>Cl<sub>2</sub>, THF and PhMe) were obtained after passing through an alumina column (Mbraun SPS-800) or purchased in a sealed bottled under inert atmosphere. Organometallic reagents were titrated before use according to literature procedures.<sup>[1]</sup> Room temperature (r.t.) refers to 18 ± 3 °C, Petrol refers to petroleum ether with the boiling range of 40 – 60 °C, brine refers to saturated aqueous sodium chloride solution, ether refers to diethylether (Et<sub>2</sub>O). All chemicals and solvents used were purchased by pertinent brands (Sigma Aldrich, Alfa Aesar, Acros, Apollo Scientific, TCI, STREM) and used without further purification unless stated. For reactions conducted during the day following cooling baths were applied: 0 °C (ice/water), –10 °C (ice/acetone), –20 °C (ice/NaCl), –45 °C (CO<sub>2</sub>(s) or N<sub>2</sub>(l)/MeCN), –60 °C (CO<sub>2</sub>(s) or N<sub>2</sub>(l)/CHCl<sub>3</sub>) and –78 °C (CO<sub>2</sub>(s)/acetone). Temperatures of 0 °C to –78 °C for overnight reactions were obtained using an immersion cooler (HAAKE EK 90). Reactions involving heating were performed using DrySyn blocks or oil baths and a contact thermocouple. Under reduced pressure refers to the use of either a Büchi Rotavapor R-200 with a Büchi V491 heating Bath and Büchi V-800 vacuum controller, a Büchi Rotavapor R-210 with a Büchi V-491 heating bath and Büchi V-850 vacuum controller, a Heidolph Laborota 4001 with vacuum controller, an IKA RV10 rotary evaporator with an IKA HB10 heating bath and ILMVAC vacuum controller, or an IKA RV10 rotary evaporator with an IKA HB10 heating bath and Vacuubrand CVC3000 vacuum controller. Rotary evaporator condensers are fitted to Julabo FL601 Recirculating Coolers filled with ethylene glycol and set to –6 °C.

Analytical thin layer chromatography (TLC)<sup>[2]</sup> was performed on pre-coated aluminium plates (Kieselgel 60 F<sub>254</sub> silica) plates purchased from Merck. Visualisation was achieved using ultraviolet light (254 nm) and staining with aqueous KMnO<sub>4</sub> or ethanolic vanillin solution followed by heating. Flash column chromatography was performed in glass columns fitted with porosity 3 sintered discs over Silica gel 60 (0.043 – 0.060 mm) using standard techniques as reported in literature with the solvent system stated.<sup>[3]</sup> Automated chromatography was performed on a Biotage® Selekt™ SEL-2SV with a 200 – 400 nm UV-detector using the method stated and Biotage® Sfär™ Silica HC D or Biotage® Sfär™ Silica D columns.

HPLC analyses were obtained on either a Shimadzu HPLC consisting of a DGU-20A5 degassing unit, LC-20AT liquid chromatography pump, SIL-20AHT autosampler, CMB-20A communications bus module, SPD-M20A diode array detector and a CTO-20A column oven or a Shimadzu HPLC consisting of a DGU-20A5R degassing unit, LC-20AD liquid chromatography pump, SIL-20AHT autosampler, SPD-20A UV/Vis detector and a CTO-20A column oven. Separation was achieved using either DAICEL CHIRALCEL OD-H and OJ-H columns or DAICEL CHIRALPAK AD-H, AS-H, IA, IB, IC and ID columns using the method stated. HPLC traces of enantiomerically enriched compounds were compared with authentic racemic spectra. Racemic compounds were synthesised under analogous reaction conditions using achiral or racemic catalysts where necessary.

Optical rotations were determined using a Perkin Elmer Precisely/Model-341 Polarimeter with a Na/Hal lamp (Na D line, 589 nm) at 20 °C.

Infrared spectra were recorded on a Shimadzu IRAffinity-1 Fourier transform IR spectrophotometer fitted with a Specac Quest ATR accessory (diamond puck). Spectra were recorded of either thin films or solids, with characteristic absorption wavenumbers ( $\nu_{\max}$ ) reported in cm<sup>-1</sup>.

$^1\text{H}$ ,  $^{13}\text{C}$ ,  $^{19}\text{F}$  and  $^{32}\text{P}$  nuclear magnetic resonance (NMR) spectra were recorded with Bruker Avance™ 300 Cryomagnet with a BBFO probe, Bruker Avance II™ 400 Ultrashield with a BBFO probe, Bruker Avance™ 500 Ultrashield with a SmartProbe BBFO+ probe or Bruker Avance III™ 500 Ascend™ with a CryoProbe Prodigy BBO probe using deuterated solvents ( $\text{CDCl}_3$ ,  $\text{CD}_2\text{Cl}_2$ ,  $\text{D}_2\text{O}$ ,  $\text{CD}_3\text{OD}$ ,  $\text{CD}_3\text{CN}$ ,  $(\text{CD}_3)_2\text{SO}$ ,  $(\text{CD}_3)_2\text{CO}$ ,  $\text{C}_6\text{D}_5\text{CD}_3$ ) purchased from Sigma-Aldrich. Chemical shifts ( $\delta$ ) are quoted in ppm and referenced to residual solvent signals reported in literature.<sup>[4]</sup>  $^{13}\text{C}\{^1\text{H}\}$  and  $^{19}\text{F}\{^1\text{H}\}$  spectra were acquired using a proton broadband decoupling sequence.  $^{13}\text{C}$  were recorded with DEPTQ or UDEFT sequences. Couplings were indicated by the use of conventional agreed abbreviations: s (singlet), d (doublet), t (triplet), q (quartet), m (multiplet), dd (doublet of doublets), td (triplet of doublets), etc. Coupling constants ( $J$ ) are denoted with the number of bonds involved in the upper left and with the atoms coupling in the bottom right edge of the symbol, e.g.  $^3J_{\text{HH}}$ . The abbreviation *Ar* denotes aromatic and *app* denotes apparent.<sup>[5]</sup> NMR peak assignments were confirmed using 2D  $^1\text{H}$  correlated spectroscopy (COSY),  $^1\text{D}$  selective  $^1\text{H}$  nuclear Overhauser effect spectroscopy (NOESY), 2D  $^1\text{H}$ - $^{13}\text{C}$  heteronuclear multiple-bond correlation spectroscopy (HMBC), and 2D  $^1\text{H}$ - $^{13}\text{C}$  heteronuclear single quantum coherence (HSQC) where necessary. For analysis of NMR-spectra MestReNova and tools therein were used.<sup>[6]</sup> For Karplus analysis transformed equation 2 was used.

Melting points were recorded on an Electrothermal 9100 melting point apparatus and are not corrected; (dec) refers to decomposition.

Mass spectrometry ( $m/z$ ) data were acquired using ThermoFisher Exactive Orbitrap mass spectrometer or Micromass GCT (TOF) mass spectrometer with solids probe. Ionisation techniques used are indicated for each compound. Values are quoted as a ratio of mass to charge ( $m/z$ ) in Daltons [Da].<sup>[7]</sup>

Common chemical abbreviations were used to indicate chemical groups or environments such as Ph (phenyl), *Ar* (aromatic, not confuse with Argon), Bn (benzyl), Et (ethyl), Me (methyl). To indicate atoms numbering schemes are displayed with the spectrum and deviate from IUPAC numbering for clarity. For names and numbering concerning stereodiscriptors IUPAC nomenclature was applied.<sup>[8]</sup>

Authentic racemic samples were prepared in an analogous fashion using racemic HyperBTM.

## 2. Reaction Optimisation

Table S1: Reaction Optimisation Data

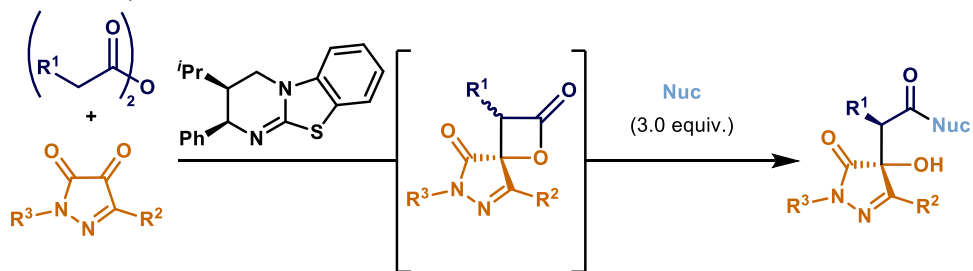

| [mol%] | equiv. Catalyst | anhydride equiv. | <sup>i</sup> Pr <sub>2</sub> NEtequiv. | BnNH <sub>2</sub> equiv. | concentration [M] | time [h] | temperature [°C] | Yield (NMR) [%] | d.r.  | e.r.  |        |
|--------|-----------------|------------------|----------------------------------------|--------------------------|-------------------|----------|------------------|-----------------|-------|-------|--------|
| 5      | HyperBTM        | 1.5              | 1.25                                   | 3                        | 0.04              | 3        | 0                | 76              | 79:21 | >99:1 | ref.   |
| 5      | HBTM            | 1.5              | 1.25                                   | 3                        | 0.04              | 3        | 0                | 72              | 79:21 | >99:1 |        |
| 5      | BTM             | 1.5              | 1.25                                   | 3                        | 0.04              | 3        | 0                | 12              | N/D   | N/D   | cat.   |
| 5      | TM·HCl          | 1.5              | 1.25                                   | 3                        | 0.04              | 3        | 0                | <5              | N/D   | N/D   |        |
| 5      | HyperBTM        | 1.0              | 1.25                                   | 3                        | 0.04              | 3        | 0                | 69              | 80:20 | >99:1 | anh.   |
| 5      | HyperBTM        | 2.5              | 1.25                                   | 3                        | 0.04              | 3        | 0                | 69              | 80:20 | >99:1 |        |
| 5      | HyperBTM        | 1.5              | 1.00                                   | 3                        | 0.04              | 3        | 0                | 72              | 79:21 | >99:1 | base   |
| 5      | HyperBTM        | 1.5              | 2.00                                   | 3                        | 0.04              | 3        | 0                | 69              | 80:20 | >99:1 |        |
| 5      | HyperBTM        | 1.5              | 1.25                                   | 2                        | 0.04              | 3        | 0                | 71              | 80:20 | >99:1 | Nuc    |
| 5      | HyperBTM        | 1.5              | 1.25                                   | 4                        | 0.04              | 3        | 0                | 73              | 79:21 | >99:1 |        |
| 5      | HyperBTM        | 1.5              | 1.25                                   | 3                        | 0.02              | 3        | 0                | 76              | 79:21 | >99:1 | conc.  |
| 5      | HyperBTM        | 1.5              | 1.25                                   | 3                        | 0.10              | 3        | 0                | 64              | 80:20 | >99:1 |        |
| 5      | HyperBTM        | 1.5              | 1.25                                   | 3                        | 0.25              | 3        | 0                | 56              | 79:21 | >99:1 |        |
| 5      | HyperBTM        | 1.5              | 1.25                                   | 3                        | 0.04              | 3        | r.t.             | 77              | 79:21 | >99:1 | temp.  |
| 5      | HyperBTM        | 1.5              | 1.25                                   | 3                        | 0.04              | 3        | -20              | 50              | 80:20 | >99:1 |        |
| 5      | HyperBTM        | 1.5              | 1.25                                   | 3                        | 0.04              | 1        | r.t.             | 73              | 79:21 | >99:1 | time   |
| 1      | HyperBTM        | 1.5              | 1.25                                   | 3                        | 0.04              | 3        | r.t.             | 71              | 79:21 | >99:1 | cat.L. |
| 10     | HyperBTM        | 1.5              | 1.25                                   | 3                        | 0.04              | 3        | r.t.             | 75              | 79:21 | 98:2  |        |

## 1. Synthesis of Homoanhydrides

### 1.1. 2-Phenylacetic Anhydride **S1**

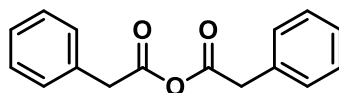

To a solution of 2-phenylacetic acid (6.81 g, 50.0 mmol) in toluene (167 ml, 0.3 M) was added *N,N'*-dicyclohexylcarbodiimide (5.16 g, 25.0 mmol) and the resulting mixture was stirred at room temperature for 15 minutes. The reaction mixture was filtered through Celite® and concentrated under reduced pressure to give the title compound as a white crystalline solid (4.30 g, 17.3 mmol, 68%) with data in accordance with the literature.<sup>[9]</sup> **mp** 68-71 °C (Et<sub>2</sub>O) {Lit.<sup>[10]</sup> 70-72 °C}; **<sup>1</sup>H NMR** (400 MHz, CDCl<sub>3</sub>) δ<sub>H</sub>: 3.72 (s, 4H, CH<sub>2</sub>), 7.23-7.19 (4H, m, PhC<sup>2,6</sup>H), 7.35-7.27 (6H, m, PhC<sup>3,4,5</sup>H).

### 1.2. 2-(α-Naphthyl)acetic Anhydride **S2**

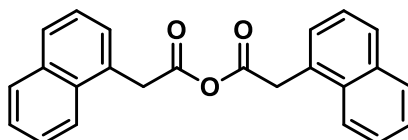

To a solution of 2-(α-naphthyl)acetic acid (2.00 g, 10.7 mmol) in toluene (36 ml, 0.3 M) was added *N,N'*-dicyclohexylcarbodiimide (1.22 g, 5.91 mmol) and the resulting mixture was stirred at room temperature for 15 minutes. The reaction mixture was filtered through Celite® and concentrated under reduced pressure to give the title compound as a white crystalline solid (1.13 g, 3.19 mmol, 59%) with data in accordance with the literature.<sup>[10]</sup> **mp** 116-118 °C (Et<sub>2</sub>O) {Lit.<sup>[11]</sup> 116-117 °C}; **<sup>1</sup>H NMR** (500 MHz, CDCl<sub>3</sub>) δ<sub>H</sub>: 4.10 (4H, s, CH<sub>2</sub>), 7.20-7.24 (2H, m, ArC<sup>2</sup>H), 7.31-7.37 (2H, m, ArC<sup>3</sup>H), 7.45-7.53 (4H, m, ArC<sup>6,7</sup>H), 7.76-7.84 (4H, m, ArC<sup>4,8</sup>H), 7.84-7.90 (2H, m, ArC<sup>5</sup>H).

### 1.3. 2-(*p*-Chlorophenyl)acetic Anhydride **S3**

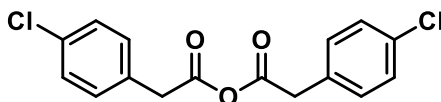

To a solution of 2-(*p*-chlorophenyl)acetic acid (853 mg, 5.00 mmol) in toluene (17 ml, 0.3 M) was added *N,N'*-dicyclohexylcarbodiimide (567 mg, 2.75 mmol) and the resulting mixture was stirred at room temperature for 15 minutes. The reaction mixture was filtered through Celite® and concentrated under reduced pressure to give the title compound as a white crystalline solid (407 mg, 1.26 mmol, 56%) with data in accordance with the literature.<sup>[9]</sup> **mp** 76-78 °C



(Et<sub>2</sub>O) {Lit.<sup>[10]</sup> 62-64 °C}; <sup>1</sup>H NMR (500 MHz, CDCl<sub>3</sub>) δ<sub>H</sub>: 3.70 (4H, s, CH<sub>2</sub>), 7.13 (4H, m, ArC<sup>2,6</sup>H), 7.29 (4H, m, ArC<sup>3,5</sup>H).

#### 1.4. 2-(*p*-Bromophenyl)acetic Anhydride **S4**

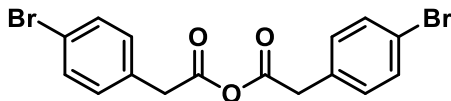

To a solution of 2-(*p*-bromophenyl)acetic acid (850 mg, 3.72 mmol) in toluene (12 ml, 0.3 M) was added *N,N'*-dicyclohexylcarbodiimide (422 mg, 2.05 mmol) and the resulting mixture was stirred at room temperature for 15 minutes. The reaction mixture was filtered through Celite® and concentrated under reduced pressure to give the title compound as a white crystalline solid (650 mg, 1.58 mmol, 85%) with data in accordance with the literature.<sup>[9]</sup> mp 92-94 °C (Et<sub>2</sub>O) {Lit.<sup>[10]</sup> 75-77 °C}; <sup>1</sup>H NMR (500 MHz, CDCl<sub>3</sub>) δ<sub>H</sub>: 3.68 (4H, s, CH<sub>2</sub>), 7.04-7.09 (4H, m, ArC<sup>2,6</sup>H), 7.42-7.48 (4H, m, ArC<sup>3,5</sup>H).

#### 1.5. 2-(*p*-Tolyl)acetic Anhydride **S5**

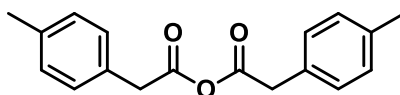

To a solution of 2-(*p*-tolyl)acetic acid (751 mg, 5.00 mmol) in toluene (17 ml, 0.3 M) was added *N,N'*-dicyclohexylcarbodiimide (567 mg, 2.75 mmol) and the resulting mixture was stirred at room temperature for 15 minutes. The reaction mixture was filtered through Celite® and concentrated under reduced pressure to give the title compound as a white crystalline solid (386 mg, 1.37 mmol, 55%) with data in accordance with the literature.<sup>[9]</sup> mp 52-55 °C (Et<sub>2</sub>O) {Lit.<sup>[12]</sup> 56-57 °C}; <sup>1</sup>H NMR (500 MHz, CDCl<sub>3</sub>) δ<sub>H</sub>: 2.34 (6H, s, CH<sub>3</sub>), 3.68 (4H, s, CH<sub>2</sub>), 7.07-7.11 (4H, m, ArC<sup>3,5</sup>H), 7.11-7.15 (4H, m, ArC<sup>2,6</sup>H).

#### 1.6. 2-(*p*-Anisyl)acetic Anhydride **S6**

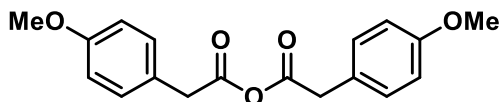

To a solution of 2-(*p*-anisyl)acetic acid (831 mg, 5.00 mmol) in toluene (17 ml, 0.3 M) was added *N,N'*-dicyclohexylcarbodiimide (516 mg, 2.50 mmol) and the resulting mixture was stirred at room temperature for 15 minutes. The reaction mixture was filtered through Celite® and concentrated under reduced pressure to give the title compound as a white crystalline solid (362 mg, 1.15 mmol, 46%) with data in accordance with the literature.<sup>[13]</sup> mp 74-76 °C

(Et<sub>2</sub>O) {Lit.<sup>[13]</sup> 77-78 °C}; <sup>1</sup>H NMR (400 MHz, CDCl<sub>3</sub>) δ<sub>H</sub>: 3.66 (4H, s, CH<sub>2</sub>), 3.80 (6H, s, OCH<sub>3</sub>), 6.81-6.89 (4H, m, ArC<sup>3,5</sup>H), 7.08-7.15 (4H, m, ArC<sup>2,6</sup>H).

#### 1.7. 2-(*m*-Bromophenyl)acetic Anhydride **S7**

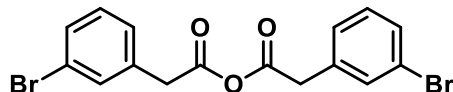

To a solution of 2-(*m*-bromophenyl)acetic acid (800 mg, 3.72 mmol) in toluene (12 ml, 0.3 M) was added *N,N'*-dicyclohexylcarbodiimide (422 mg, 2.05 mmol) and the resulting mixture was stirred at room temperature for 15 minutes. The reaction mixture was filtered through Celite<sup>®</sup> and concentrated under reduced pressure to give the title compound as a white solid (488 mg, 1.18 mmol, 64%) with data in accordance with the literature.<sup>[14]</sup> mp 44-46 °C <sup>1</sup>H NMR (500 MHz, CDCl<sub>3</sub>) δ<sub>H</sub>: 3.70 (4H, s, CH<sub>2</sub>), 7.12-7.17 (2H, m, ArC<sup>6</sup>H), 7.21 (2H, app t, <sup>3</sup>J<sub>HH</sub> = 7.8 Hz, ArC<sup>5</sup>H), 7.38 (2H, app t, <sup>4</sup>J<sub>HH</sub> = 1.9 Hz, ArC<sup>2</sup>H), 7.44 (2H, ddd, <sup>3</sup>J<sub>HH</sub> = 7.9 Hz, <sup>4</sup>J<sub>HH</sub> = 1.9 Hz, 1.1 Hz, ArC<sup>4</sup>H).

#### 1.8. 2-(*o*-Tolyl)acetic Anhydride **S8**

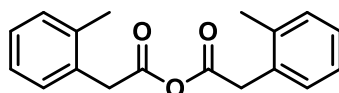

To a solution of 2-(*o*-tolyl)acetic acid (1.00 g, 6.66 mmol) in toluene (22 ml, 0.3 M) was added *N,N'*-dicyclohexylcarbodiimide (750 mg, 3.70 mmol) and the resulting mixture was stirred at room temperature for 15 minutes. The reaction mixture was filtered through Celite<sup>®</sup> and concentrated under reduced pressure to give the title compound as a colourless oil (365 mg, 1.37 mmol, 39%) with data in accordance with the literature.<sup>[10]</sup> <sup>1</sup>H NMR (500 MHz, CDCl<sub>3</sub>) δ<sub>H</sub>: 2.24 (6H, s, CH<sub>3</sub>), 3.72 (4H, s, CH<sub>2</sub>), 7.10 (2H, dd, <sup>3</sup>J<sub>HH</sub> = 7.6 Hz, <sup>4</sup>J<sub>HH</sub> = 1.5 Hz, ArCH), 7.12-7.24 (6H, m, ArCH).

#### 1.9. 2-(*N*-Methylindol-3-yl)acetic Anhydride **S9**

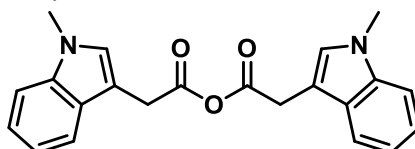

To a solution of 2-(*N*-methylindol-3-yl)acetic acid (1.00 g, 5.29 mmol) in toluene (18 ml, 0.3 M) was added *N,N'*-dicyclohexylcarbodiimide (600 mg, 2.90 mmol) and the resulting mixture was stirred at room temperature for 15 minutes. The reaction mixture was filtered through Celite<sup>®</sup> and concentrated under reduced pressure to give the title compound as a brown oil (810 mg,

2.22 mmol, 85%) with data in accordance with the literature.<sup>[15]</sup> **<sup>1</sup>H NMR** (500 MHz, CDCl<sub>3</sub>) δ<sub>H</sub>: 3.70 (6H, s, NCH<sub>3</sub>), 3.87 (4H, d, <sup>4</sup>J<sub>HH</sub> = 0.9 Hz, CH<sub>2</sub>), 6.93 (2H, d, <sup>4</sup>J<sub>HH</sub> = 0.9 Hz, ArC<sup>2</sup>H), 7.12 (2H, ddd, <sup>3</sup>J<sub>HH</sub> = 8.0 Hz, 6.8 Hz, <sup>4</sup>J<sub>HH</sub> = 1.2 Hz, ArH), 7.21-7.25 (2H, m, ArH), 7.28-7.30 (2H, m, ArH), 7.50 (2H, app dt, <sup>3</sup>J<sub>HH</sub> = 7.9 Hz, <sup>4</sup>J<sub>HH</sub> = 1.9 Hz, ArH).

1.10. 2-(Thiophen-3-yl)acetic Anhydride **S10**

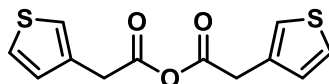

To a solution of 2-(thiophen-3-yl)acetic acid (1.00 g, 7.03 mmol) in toluene (23 ml, 0.3 M) was added *N,N'*-dicyclohexylcarbodiimide (798 mg, 3.90 mmol) and the resulting mixture was stirred at room temperature for 15 minutes. The reaction mixture was filtered through Celite® and concentrated under reduced pressure to give the title compound as a pale yellow crystalline solid (365 mg, 1.37 mmol, 39%) with data in accordance with the literature.<sup>[9]</sup> **mp** 39-40 °C {Lit.<sup>[9]</sup> 40-42 °C (PhMe)}; **<sup>1</sup>H NMR** (500 MHz, CDCl<sub>3</sub>) δ<sub>H</sub>: 3.79 (4H, s, CH<sub>2</sub>), 6.99 (2H, dd, <sup>3</sup>J<sub>HH</sub> = 5.0 Hz, <sup>4</sup>J<sub>HH</sub> = 1.3 Hz, ArC<sup>5</sup>H), 7.15 (2H, m, ArC<sup>2</sup>H), 7.31 (2H, dd, <sup>3</sup>J<sub>HH</sub> = 5.0 Hz, <sup>4</sup>J<sub>HH</sub> = 3.0 Hz, ArC<sup>4</sup>H).

1.11. (*E*)-5-Methylhex-3-enic Anhydride **S11**

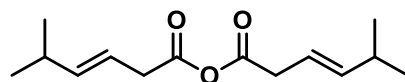

To a solution of (*E*)-5-methylhex-3-enoic acid (1.50 g, 11.70 mmol) in toluene (39 ml, 0.3 M) was added *N,N'*-dicyclohexylcarbodiimide (1.33 g, 6.44 mmol) and the resulting mixture was stirred at room temperature for 30 minutes. The reaction mixture was filtered through Celite® and concentrated under reduced pressure to give the title compound as a colourless oil as a 88:12 mixture of anhydride : acid (1.30 g, 5.46 mmol, 47%) with data in accordance with the literature.<sup>[10]</sup> **<sup>1</sup>H NMR** (400 MHz, CDCl<sub>3</sub>) δ<sub>H</sub>: 0.99 (12H, <sup>3</sup>J<sub>HH</sub> = 6.7 Hz, CH(CH<sub>3</sub>)<sub>2</sub>), 2.25 – 2.37 (2H, m, CH(CH<sub>3</sub>)<sub>2</sub>), 3.16 (4H, dt, <sup>3</sup>J<sub>HH</sub> = 6.7 Hz, <sup>4</sup>J<sub>HH</sub> = 1.3 Hz, CH<sub>2</sub>COO), 5.44 (2H, dtd, <sup>3</sup>J<sub>HH</sub> = 15.4 Hz, 6.7 Hz, <sup>4</sup>J<sub>HH</sub> = 1.3 Hz, CH=CH-CH<sub>2</sub>), 5.59 (2H, ddt, <sup>3</sup>J<sub>HH</sub> = 15.4 Hz, 6.5 Hz, CH=CH-CH(CH<sub>3</sub>)<sub>2</sub>); the compound was used without further purification.

## 2. Synthesis of Pyrazol-3-ones

### 2.1. 5-Methyl-2-phenyl-2,4-dihydro-3H-pyrazol-3-one **S12**

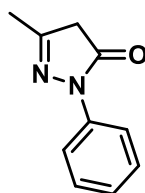

To ethyl acetoacetate (8.13 ml, 62.5 mmol) was slowly added phenylhydrazine (6.25 ml, 62.5 mmol). The mixture was stirred at 145 °C for 60 minutes to give the title compound as pale yellow solid (10.89 g, 62.5 mmol, 89%) with data in accordance with the literature.<sup>[16]</sup> **mp** 126-128 °C {Lit.<sup>[16]</sup> 125-128 °C}; **<sup>1</sup>H NMR** (400 MHz, CDCl<sub>3</sub>) δ<sub>H</sub>: 2.21 (1H, s, CH<sub>3</sub>), 3.44 (2H, q, <sup>4</sup>J<sub>HH</sub> = 0.7 Hz, CH<sub>2</sub>), 7.15-7.21 (1H, m, ArC<sup>4</sup>H), 7.36-7.41 (2H, m, ArC<sup>3,5</sup>H), 7.83-7.88 (2H, m, ArC<sup>2,6</sup>H).

### 2.2. 5-Isopropyl-2-phenyl-2,4-dihydro-3H-pyrazol-3-one **S13**

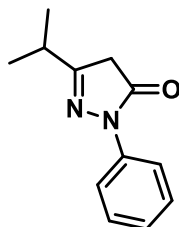

To ethyl 4-methyl-oxo-pentanoate (1.0 ml, 6.3 mmol) was slowly added phenylhydrazine (0.62 ml, 6.3 mmol). The mixture was heated at 145 °C for 60 minutes to give the title compound as yellow solid (797 mg, 3.9 mmol, 63%) with data in accordance with the literature.<sup>[17]</sup> **mp** 84-86 °C {Lit.<sup>[18]</sup> 87 °C}; **<sup>1</sup>H NMR** (500 MHz, CDCl<sub>3</sub>) δ<sub>H</sub>: 1.26 (6H, d, <sup>3</sup>J<sub>HH</sub> = 6.9 Hz, CH(CH<sub>3</sub>)<sub>2</sub>), 2.80 (1H, hept, <sup>3</sup>J<sub>HH</sub> = 6.9 Hz, CH(CH<sub>3</sub>)<sub>2</sub>), 3.43 (2H, s, CH<sub>2</sub>), 7.14-7.21 (1H, m, ArC<sup>4</sup>H), 7.35-7.43 (2H, m, ArC<sup>3,5</sup>H), 7.83-7.93 (2H, m, ArC<sup>2,6</sup>H).

### 2.3. 2,5-Diphenyl-2,4-dihydro-3H-pyrazol-3-one **S14**

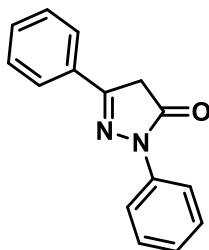

To ethyl 3-oxo-3-phenylpropanoate (0.9 ml, 5.2 mmol) was slowly added phenylhydrazine (0.51 ml, 5.2 mmol). The mixture was heated at 120 °C for 20 minutes to give the title compound as pale orange solid (985 mg, 4.2 mmol, 80%) with data in accordance with the

literature.<sup>[17]</sup> mp 134-136 °C {Lit.<sup>[17]</sup> 136-138 °C}; <sup>1</sup>H NMR (400 MHz, CDCl<sub>3</sub>) δ<sub>H</sub>: 3.87 (2H, s, CH<sub>2</sub>), 7.20-7.25 (1H, m, ArCH), 7.40-7.51 (5H, m, ArCH), 7.75-7.82 (2H, m, ArCH), 7.95-8.02 (2H, m, ArCH).

#### 2.4. 2-(*tert*-Butyl)-5-methyl-2,4-dihydro-3H-pyrazol-3-one S15

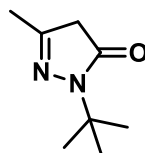

To a solution of ethyl acetoacetate (1.27 ml, 10.0 mmol) in EtOH (11.5 ml, 0.87 M), was added *tert*-butylhydrazine hydrochloride (2.49 g, 20.0 mmol) and sodium acetate (1.64 g, 20.0 mmol). The reaction mixture was refluxed overnight under a positive pressure of N<sub>2</sub>. After cooling to room temperature, the mixture was diluted with water and extracted with CH<sub>2</sub>Cl<sub>2</sub>. The combined organic layers were dried over MgSO<sub>4</sub>, filtered, and concentrated *in vacuo*. The resulting crude solid was suspended in Et<sub>2</sub>O at -20 °C and filtered to give the title compound as a white solid (1.19 g, 7.7 mmol, 77%) with data in accordance with the literature.<sup>[19]</sup> mp 127-128 °C {Lit.<sup>[19]</sup> 125-127 °C}; <sup>1</sup>H NMR (500 MHz, CDCl<sub>3</sub>) δ<sub>H</sub>: 1.49 (9H, s, C(CH<sub>3</sub>)<sub>3</sub>), 2.04 (3H, s, C<sup>5</sup>CH<sub>3</sub>), 3.17 (2H, s, CH<sub>2</sub>).

#### 2.5. 2-(*p*-Anisyl)-5-methyl-2,4-dihydro-3H-pyrazole-3-one S16

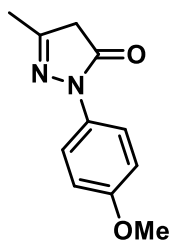

To *p*-anisylhydrazine hydrochloride (1.75 mg, 10.0 mmol) and triethylamine (2.1 ml, 15.0 mmol) in EtOH (30 ml, 0.5 M) was added ethyl acetoacetate (1.26 ml, 10.0 mmol). The mixture was heated at 60 °C overnight. The solvent was removed under reduced pressure. Further purification by column chromatography (petroleum ether : ethyl acetate 4:1 to 1:1) gave the title compound as pale yellow solid (1.34 g, 6.6 mmol, 66%) with data in accordance with the literature.<sup>[20]</sup> mp 130 °C (dec) (Hexane/EtOAc) {Lit.<sup>[21]</sup> 124-126 °C, 127-128 °C (Hexane:THF)}; IR ν<sub>max</sub> (film) 2930 (C-H), 2357, 1508 (C=O), 1248, 1032, 831, 775; <sup>1</sup>H NMR (500 MHz, CDCl<sub>3</sub>) δ<sub>H</sub>: 2.19 (3H, s, C<sup>5</sup>CH<sub>3</sub>), 3.41 (2H, s, CH<sub>2</sub>), 3.81 (3H, s, OCH<sub>3</sub>), 6.89-6.94 (2H, m, ArC<sup>3,5</sup>H), 7.69-7.75 (2H, m, ArC<sup>2,6</sup>H).

### 2.6. 5-Methyl-2-(4-(trifluoromethyl)phenyl)-2,4-dihydro-3H-pyrazol-3-one **S17**

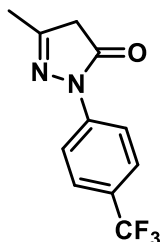

To *p*-(trifluoromethyl)phenylhydrazine hydrochloride (2.13 ml, 10.0 mmol) and triethylamine (2.1 ml, 15.0 mmol) in EtOH (30 ml, 0.5 M) was added ethyl acetoacetate (1.26 ml, 10.0 mmol). The mixture was heated at 60 °C overnight. The solvent was removed under reduced pressure. Further purification by column chromatography (petroleum ether : ethyl acetate 4:1 to 1:1) gave the title compound as pale yellow solid (871 mg, 3.6 mmol, 36%) with data in accordance with the literature.<sup>[22]</sup> **mp** 170 °C (dec) (Hexane:EtOAc) {Lit.<sup>[22]</sup> 183-185 °C}; **IR**  $\nu_{\max}$  (film) 2691 (O-H, enol), 2359, 1628 (C=O), 1607, 1327, 1109, 1072; **<sup>1</sup>H NMR** (500 MHz, CDCl<sub>3</sub>)  $\delta_{\text{H}}$ : 2.22 (3H, s, CH<sub>3</sub>), 3.47 (2H, s, CH<sub>2</sub>), 7.64 (2H, app d, <sup>3</sup>J<sub>HH</sub> = 8.6 Hz, ArC<sup>2,6</sup>H), 8.05 (2H, app d, <sup>3</sup>J<sub>HH</sub> = 8.6 Hz, ArC<sup>3,5</sup>H).

## 3. Synthesis of Pyrazol-3-one-derived ketimines

### 3.1. 5-Methyl-2-phenyl-4-(phenylimino)-2,4-dihydro-3H-pyrazol-3-one **S18**

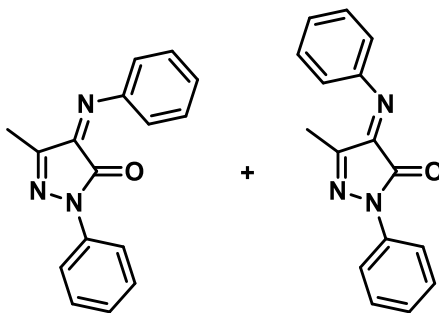

To a solution of 5-methyl-2-phenyl-2,4-dihydro-3H-pyrazol-3-one (8.50 g, 48.8 mmol) in MeOH (30 ml, 0.6 M) was added nitrosobenzene (5.22 g, 48.8 mmol) and K<sub>2</sub>CO<sub>3</sub> (1.35 g, 9.8 mmol) and the resulting mixture was heated at reflux for 3 h. After cooling to room temperature, the solvent was removed under reduced pressure. Purification by column chromatography (petroleum ether : diethyl ether 1:0 to 3:1) gave the title compound as inseparable mixture of isomers as red solid (3.79 g, 14.4 mmol, 30%, 83:17 d.r.) with data in accordance with the literature.<sup>[23]</sup> **mp** 101-103 °C {Lit.<sup>[23]</sup> 101-103 °C}; **<sup>1</sup>H NMR** (400 MHz, CDCl<sub>3</sub>) (*major diastereomer*)  $\delta_{\text{H}}$ : 2.35 (3H, s, CH<sub>3</sub>), 7.17-7.23 (1H, m, ArCH), 7.28-7.48 (7H, m, ArCH), 7.84-

7.89 (2H, m, ArCH);  $^1\text{H NMR}$  (400 MHz,  $\text{CDCl}_3$ ) (*minor diastereomer, selected*)  $\delta_{\text{H}}$ : 1.80 (3H, s,  $\text{CH}_3$ ), 6.94-6.99 (2H, m, ArCH), 7.92-7.96 (2H, m, ArCH).

### 3.2. 5-Isopropyl-2-phenyl-4-(phenylimino)-2,4-dihydro-3H-pyrazol-3-one **S19**

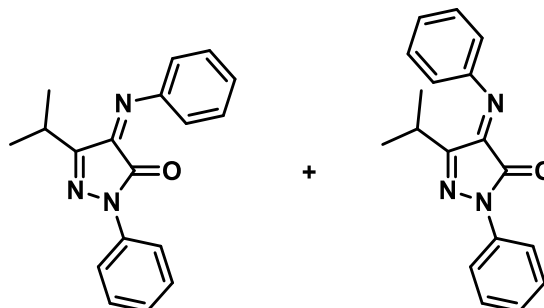

To a solution of 5-isopropyl-2-phenyl-2,4-dihydro-3H-pyrazol-3-one (2.50 g, 12.6 mmol) in MeOH (21 ml, 0.6 M) was added nitrosobenzene (1.35 g, 12.6 mmol) and  $\text{K}_2\text{CO}_3$  (348 mg, 2.5 mmol) and the resulting mixture was heated at reflux for 3 h. After cooling to room temperature, the solvent was removed under reduced pressure. Purification by column chromatography (petroleum ether : diethyl ether 1:0 to 3:1) gave the title compound as an inseparable mixture of isomers as red solid (1.68 g, 5.8 mmol, 46%, 95:5 d.r.) with data in accordance with the literature.<sup>[23]</sup> **mp** 79-81 °C {Lit.<sup>[23]</sup> 77-79 °C};  $^1\text{H NMR}$  (500 MHz,  $\text{CDCl}_3$ ) (*major diastereomer*)  $\delta_{\text{H}}$ : 1.41 (6H, d,  $^3J_{\text{HH}} = 6.9$  Hz,  $\text{CH}(\text{CH}_3)_2$ ), 3.19 (1H, hept,  $^3J_{\text{HH}} = 6.9$  Hz,  $\text{CH}(\text{CH}_3)_2$ ), 7.17-7.22 (1H, m, ArCH), 7.29-7.35 (3H, m, ArCH), 7.36-7.47 (4H, m, ArCH), 7.87-7.92 (2H, m, ArH);  $^1\text{H NMR}$  (500 MHz,  $\text{CDCl}_3$ ) (*minor diastereomer, selected*)  $\delta_{\text{H}}$ : 0.98 (6H, d,  $^3J_{\text{HH}} = 6.7$  Hz,  $\text{CH}(\text{CH}_3)_2$ ), 2.46 (1H, hept,  $^3J_{\text{HH}} = 6.7$  Hz,  $\text{CH}(\text{CH}_3)_2$ ), 7.95-8.00 (2H, d,  $J_{\text{HH}} 8.0$ , ArCH).

### 3.3. 2,5-Diphenyl-4-(phenylimino)-2,4-dihydro-3H-pyrazol-3-one **S20**

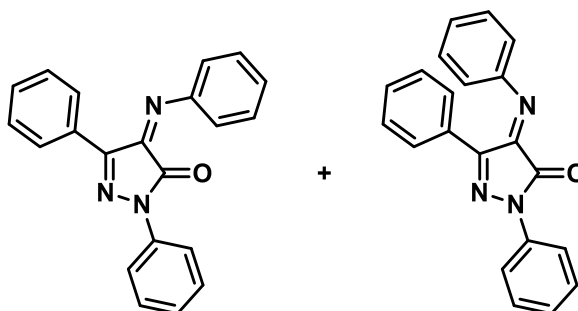

To a solution of 2,5-diphenyl-2,4-dihydro-3H-pyrazol-3-one (1.80 g, 7.6 mmol) in MeOH (4.5 ml, 0.6 M) was added nitrosobenzene (816 mg, 7.6 mmol) and  $\text{K}_2\text{CO}_3$  (211 mg, 1.5 mmol) and the resulting mixture was heated at reflux for 3 h. After cooling to room temperature, the solvent was removed under reduced pressure. Purification by column chromatography

(petroleum ether : diethyl ether 1:0 to 3:1) gave the title compound as red solid (726 mg, 2.2 mmol, 29%) with data in accordance with the literature.<sup>[23]</sup> **mp** 178-181 °C {Lit.<sup>[23]</sup> 176-178 °C}; **<sup>1</sup>H NMR** (500 MHz, CDCl<sub>3</sub>) δ<sub>H</sub>: 7.21-7.26 (1H, m, ArCH), 7.28-7.36 (3H, m, ArCH), 7.41-7.52 (7H, m, ArCH), 7.95-7.99 (2H, m, ArCH), 8.26-8.34 (2H, m, ArCH).

#### 3.4. 2-(*tert*-Butyl)-5-methyl-4-(phenylimino)-2,4-dihydro-3*H*-pyrazol-3-one **S21**

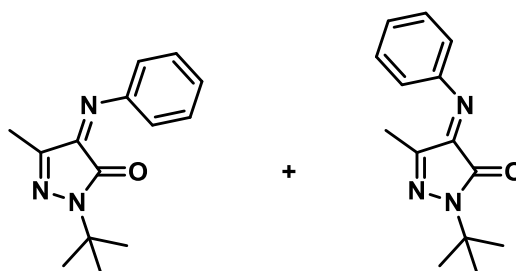

To a solution of 2-(*tert*-butyl)-5-methyl-2,4-dihydro-3*H*-pyrazol-3-one (1.00 g, 6.48 mmol) in MeOH (11 ml, 0.6 M) was added nitrosobenzene (695 g, 6.48 mmol) and K<sub>2</sub>CO<sub>3</sub> (179 mg, 1.3 mmol) and the resulting mixture was heated at reflux for 3 h. After cooling to room temperature, the solvent was removed under reduced pressure. Purification by column chromatography (petroleum ether : diethyl ether 1:0 to 3:1) gave the title compound as an inseparable mixture of isomers as red solid (697 mg, 2.9 mmol, 44%, 75:25 d.r.) with data in accordance with the literature.<sup>[23]</sup> **mp** 60-62 °C; **IR** ν<sub>max</sub> (film) 3062, 2978 (C-H), 2932 (C-H), 1703, 1699, 1364, 1279, 1217, 1099, 1022, 916, 795, 768; **HRMS** (ESI<sup>+</sup>) C<sub>14</sub>H<sub>18</sub>N<sub>3</sub>O [M+H]<sup>+</sup> found 244.1439, requires 244.1444 (−2.3 ppm). *Data for major diastereomer*: **<sup>1</sup>H NMR** (500 MHz, CDCl<sub>3</sub>) δ<sub>H</sub>: 1.49 (9H, s, C(CH<sub>3</sub>)<sub>3</sub>), 2.19 (3H, s, C<sup>5</sup>CH<sub>3</sub>), 7.20-7.28 (3H, m, ArC<sup>2,4,6</sup>H), 7.34-7.43 (2H, m, ArC<sup>3,5</sup>H); **<sup>13</sup>C{<sup>1</sup>H} NMR** (126 MHz, CDCl<sub>3</sub>) δ<sub>C</sub>: 12.2 (C<sup>5</sup>CH<sub>3</sub>), 28.2 (C(CH<sub>3</sub>)<sub>3</sub>), 58.3 (C(CH<sub>3</sub>)<sub>3</sub>), 120.9 (ArC<sup>2,6</sup>H), 127.7 (ArC<sup>4</sup>H), 128.6 (ArC<sup>3,5</sup>H), 146.7 (ArC<sup>1</sup>), 147.8 (C<sup>5</sup>CH<sub>3</sub>), 154.1 (C<sup>4</sup>=O), 154.7 (C<sup>3</sup>=O); *Data for minor diastereomer*: **<sup>1</sup>H NMR** (400 MHz, CDCl<sub>3</sub>) (*selected*) δ<sub>H</sub>: 1.56 (9H, s, C(CH<sub>3</sub>)<sub>3</sub>), 1.62 (3H, s, C<sup>5</sup>CH<sub>3</sub>), 6.93 (2H, d, <sup>3</sup>J<sub>HH</sub> = 7.4 Hz, ArC<sup>2,6</sup>H); **<sup>13</sup>C{<sup>1</sup>H} NMR** (126 MHz, CDCl<sub>3</sub>) δ<sub>C</sub>: 16.3 (C<sup>5</sup>CH<sub>3</sub>), 28.1 (C(CH<sub>3</sub>)<sub>3</sub>), 58.4 (C(CH<sub>3</sub>)<sub>3</sub>), 118.8 (ArC<sup>2,6</sup>H), 126.4 (ArC<sup>4</sup>H), 128.9 (ArC<sup>3,5</sup>H), 139.3 (C<sup>5</sup>CH<sub>3</sub>), 148.7 (ArC<sup>1</sup>), 152.8 (C<sup>4</sup>(NPh)), 159.1 (C<sup>3</sup>(O)N).



## 4. Synthesis of Pyrazole-4,5-diones

### 4.1. 3-Methyl-1-phenyl-1H-pyrazole-4,5-dione **S22**

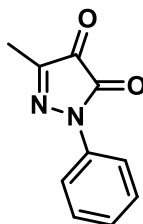

To a solution of 5-methyl-2-phenyl-4-(phenylimino)-2,4-dihydro-3H-pyrazol-3-one (3.56 g, 13.5 mmol) in THF (104 ml, 0.13 M) was added 2 M aq. HCl (13.5 ml, 27.0 mmol) and the resulting solution was stirred at room temperature until the reaction was complete by TLC. The reaction mixture was diluted with H<sub>2</sub>O and extracted with CH<sub>2</sub>Cl<sub>2</sub>. The combined organic layers were concentrated *in vacuo*. Purification by column chromatography (petroleum ether : ethyl acetate 1:1) gave the title compound as red solid (2.01 g, 10.7 mmol, 81%).<sup>[24]</sup> **mp** 121-123 °C {Lit.<sup>[24]</sup> 119-121 °C}; **<sup>1</sup>H NMR** (400 MHz, CDCl<sub>3</sub>) δ<sub>H</sub>: 2.24 (3H, s, CH<sub>3</sub>), 7.24-7.33 (1H, m, ArC<sup>4</sup>H), 7.41-7.51 (2H, m, ArC<sup>3,5</sup>H), 7.84-7.92 (2H, m, ArC<sup>2,6</sup>H).

### 4.2. 3-Isopropyl-1-phenyl-1H-pyrazole-4,5-dione **S23**

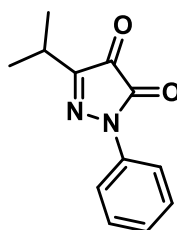

To a solution of 5-isopropyl-2-phenyl-4-(phenylimino)-2,4-dihydro-3H-pyrazol-3-one (1.65 g, 5.7 mmol) in THF (44 ml, 0.13 M) was added 2 M aq. HCl (5.7 ml, 11.4 mmol) and the resulting solution was stirred at room temperature until the reaction was complete by TLC. The reaction mixture was diluted with H<sub>2</sub>O and extracted with CH<sub>2</sub>Cl<sub>2</sub>. The combined organic layers were concentrated *in vacuo*. Purification by column chromatography (petroleum ether : ethyl acetate 1:1) gave the title compound as red solid (1.13 g, 5.2 mmol, 92%).<sup>[24]</sup> **mp** 50-52 °C {Lit.<sup>[24]</sup> 51-53 °C}; **<sup>1</sup>H NMR** (500 MHz, CDCl<sub>3</sub>) δ<sub>H</sub>: 1.34 (6H, d, <sup>3</sup>J<sub>HH</sub> = 6.9 Hz, CH(CH<sub>3</sub>)<sub>2</sub>), 2.96 (1H, hept, <sup>3</sup>J<sub>HH</sub> = 6.9 Hz, CH(CH<sub>3</sub>)<sub>2</sub>), 7.25-7.30 (1H, m, ArC<sup>4</sup>H), 7.43-7.49 (2H, m, ArC<sup>3,5</sup>H), 7.88-7.92 (2H, m, ArC<sup>2,6</sup>H).

#### 4.3. 1,3-Diphenyl-1*H*-pyrazole-4,5-dione **S24**

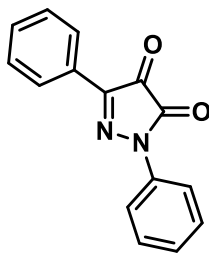

To a solution of 2,5-diphenyl-4-(phenylimino)-2,4-dihydro-3*H*-pyrazol-3-one (725 mg, 2.2 mmol) in THF (17 ml, 0.13 M) was added 2 M aq. HCl (2.2 ml, 4.4 mmol) and the resulting solution was stirred at room temperature until the reaction was complete by TLC. The reaction mixture was diluted with H<sub>2</sub>O and extracted with CH<sub>2</sub>Cl<sub>2</sub>. The combined organic layers were concentrated *in vacuo*. Purification by column chromatography (petroleum ether : ethyl acetate 1:1) gave the title compound as red solid (558 mg, 2.2 mmol, 100%).<sup>[24]</sup> **mp** 161-163 °C {Lit.<sup>[24]</sup> 165-166 °C}; **<sup>1</sup>H NMR** (500 MHz, CDCl<sub>3</sub>) δ<sub>H</sub>: 7.29-7.35 (1H, m, ArC<sup>4</sup>H), 7.47-7.57 (5H, m, ArCH), 7.97-8.02 (2H, m, ArCH), 8.17-8.23 (2H, m, ArCH).

#### 4.4. 1-(*tert*-Butyl)-3-methyl-1*H*-pyrazole-4,5-dione **S25**

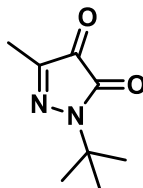

To a solution of 1-(*tert*-butyl)-5-methyl-4-(phenylimino)-2,4-dihydro-3*H*-pyrazol-3-one (600 mg, 2.4 mmol) in THF (19 ml, 0.13 M) was added 2 M aq. HCl (2.4 ml, 4.8 mmol) and the resulting solution was stirred at room temperature until the reaction was complete by TLC. The reaction mixture was diluted with H<sub>2</sub>O and extracted with CH<sub>2</sub>Cl<sub>2</sub>. The combined organic layers were concentrated *in vacuo*. Purification by column chromatography (petroleum ether : ethyl acetate 1:1) gave the title compound as red oil (386 g, 2.3 mmol, 93%).<sup>[25]</sup> **IR** ν<sub>max</sub> (film) 1306, 2980 (C-H), 2934 (C-H), 2359, 1757, 1724 (C=O), 1701, 1368, 1026; **<sup>1</sup>H NMR** (500 MHz, CDCl<sub>3</sub>) δ<sub>H</sub>: 1.52 (9H, s, C(CH<sub>3</sub>)<sub>3</sub>), 2.06 (3H, s, C<sup>3</sup>CH<sub>3</sub>); **<sup>13</sup>C{<sup>1</sup>H} NMR** (126 MHz, CDCl<sub>3</sub>) δ<sub>C</sub>: 11.1 (C<sup>3</sup>CH<sub>3</sub>), 27.9 (C(CH<sub>3</sub>)<sub>3</sub>), 59.3 (C(CH<sub>3</sub>)<sub>3</sub>), 142.0 (C<sup>3</sup>CH<sub>3</sub>), 150.9 (C<sup>5</sup>(O)N), 186.4 (C<sup>4</sup>(O)); **HRMS** (ESI<sup>+</sup>) C<sub>8</sub>H<sub>13</sub>N<sub>2</sub>O<sub>2</sub> [M+H]<sup>+</sup> found 169.0970, requires 169.0972 (-0.9 ppm).

#### 4.5. 1-(*p*-Anisyl)-3-methyl-1*H*-pyrazole-4,5-dione **S26**

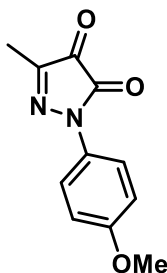

To a solution of 2-(*p*-anisyl)-5-methyl-2,4-dihydro-3*H*-pyrazol-3-one (1.40 g, 6.7 mmol) in MeOH (11 ml, 0.6 M) was added nitrosobenzene (735 mg, 6.7 mmol) and K<sub>2</sub>CO<sub>3</sub> (190 mg, 1.4 mmol) and the resulting mixture was heated at reflux for 3 h. After cooling to room temperature, the solvent was removed under reduced pressure. Purification by column chromatography (petroleum ether : diethyl ether 1:0 to 3:1) gave the title compound as red solid (275 mg, 0.9 mmol, 14%) which was used directly without further purification. <sup>1</sup>H NMR (500 MHz, CDCl<sub>3</sub>) δ<sub>H</sub>: 2.33 (3H, s, C<sup>5</sup>CH<sub>3</sub>), 3.81 (3H, s, OCH<sub>3</sub>), 6.90-6.93 (2H, m, N<sup>2</sup>ArC<sup>3,5</sup>H), 7.30-7.34 (1H, m, C<sup>4</sup>=NArC<sup>4</sup>H), 7.24-7.38 (2H, m, C<sup>4</sup>=NArC<sup>2,6</sup>H), 7.40-7.44 (2H, m, C<sup>4</sup>=NArC<sup>3,5</sup>H), 7.73-7.78 (2H, m, N<sup>2</sup>ArC<sup>2,6</sup>H).

To a solution of crude 2-(*p*-anisyl)-5-methyl-4-(phenylimino)-2,4-dihydro-3*H*-pyrazol-3-one (275 mg, 0.9 mmol) in THF (7 ml, 0.13 M) was added 2 M aq. HCl (0.9 ml, 1.8 mmol) and the resulting solution was stirred at room temperature until the reaction was complete by TLC. The reaction mixture was diluted with H<sub>2</sub>O and extracted with CH<sub>2</sub>Cl<sub>2</sub>. The combined organic layers were concentrated *in vacuo*. Purification by column chromatography (petroleum ether : ethyl acetate 1:1) gave the title compound as red solid (271 mg, 1.2 mmol, 76%). mp 121-123 °C; IR ν<sub>max</sub> (film) 3327, 1771, 1699 (C=O, amide), 1514 (C=O, ketone), 1250, 831; <sup>1</sup>H NMR (500 MHz, CDCl<sub>3</sub>) δ<sub>H</sub>: 2.21 (3H, s, C<sup>3</sup>CH<sub>3</sub>), 3.84 (3H, s, OCH<sub>3</sub>), 6.94-7.00 (2H, m, ArC<sup>3,5</sup>H), 7.73-7.79 (2H, m, ArC<sup>2,6</sup>H); <sup>13</sup>C{<sup>1</sup>H} NMR (126 MHz, CDCl<sub>3</sub>) δ<sub>C</sub>: 11.2 (C<sup>5</sup>CH<sub>3</sub>), 55.7 (OCH<sub>3</sub>), 114.4 (ArC<sup>3,5</sup>H), 119.8 (ArC<sup>2,6</sup>H), 130.3 (ArC<sup>1</sup>), 144.3 (C<sup>3</sup>CH<sub>3</sub>), 148.9 (C<sup>5</sup>=O), 158.0 (ArC<sup>4</sup>OCH<sub>3</sub>), 185.1 (C<sup>4</sup>=O); HRMS (ESI<sup>+</sup>) C<sub>11</sub>H<sub>11</sub>N<sub>2</sub>O<sub>3</sub> [M+H]<sup>+</sup> found 219.0765, requires 219.0764 (+0.3 ppm).

#### 4.6. 3-Methyl-1-(*p*-(trifluoromethyl)phenyl)-1*H*-pyrazole-4,5-dione **S27**

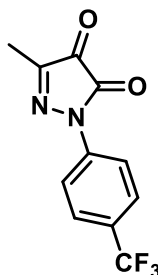

To a solution of 5-methyl-2-(*p*-trifluoromethyl)phenyl-2,4-dihydro-3*H*-pyrazol-3-one (712 mg, 2.9 mmol) in MeOH (5 ml, 0.6 M) was added nitrosobenzene (315 mg, 2.9 mmol) and K<sub>2</sub>CO<sub>3</sub> (81 mg, 0.6 mmol) and the resulting mixture was heated at reflux for 3 h. After cooling to room temperature, the solvent was removed under reduced pressure. Purification by column chromatography (petroleum ether : diethyl ether 1:0 to 3:1) gave the title compound as red solid (195 mg, 0.6 mmol, 20%) which was used directly without further purification. <sup>1</sup>H NMR (500 MHz, CDCl<sub>3</sub>) δ<sub>H</sub>: 2.37 (3H, s, CH<sub>3</sub>), 7.33-7.39 (3H, m, C<sup>4</sup>=NArC<sup>3,4,5</sup>H), 7.42-7.46 (2H, m, C<sup>4</sup>=NArC<sup>2,6</sup>H), 7.64 (2H, d, <sup>3</sup>J<sub>HH</sub> = 8.6 Hz, N<sup>2</sup>ArC<sup>2,6</sup>H), 8.05 (2H, d, <sup>3</sup>J<sub>HH</sub> = 8.6 Hz, N<sup>2</sup>ArC<sup>3,5</sup>H).

To a solution of crude 5-methyl-2-(*p*-trifluoromethyl)phenyl-4-(phenylimino)-2,4-dihydro-3*H*-pyrazol-3-one (195 mg, 0.6 mmol) in THF (4.5 ml, 0.13 M) was added 2 M aq. HCl (0.6 ml, 1.2 mmol) and the resulting solution was stirred at room temperature until the reaction was complete by TLC. The reaction mixture was diluted with H<sub>2</sub>O and extracted with CH<sub>2</sub>Cl<sub>2</sub>. The combined organic layers were concentrated *in vacuo*. Purification by column chromatography (petroleum ether : ethyl acetate 1:1) gave the title compound as red solid (90 mg, 0.35 mmol, 59%) with data in accordance with the literature.<sup>[25]</sup> mp 110 °C (dec) (Hexane:EtOAc); <sup>1</sup>H NMR (500 MHz, CDCl<sub>3</sub>) δ<sub>H</sub>: 2.27 (3H, s, CH<sub>3</sub>), 7.72 (2H, d, <sup>3</sup>J<sub>HH</sub> = 8.6 Hz, ArC<sup>2,6</sup>H), 8.06 (2H, d, <sup>3</sup>J<sub>HH</sub> = 8.6 Hz, ArC<sup>3,5</sup>H); <sup>19</sup>F{<sup>1</sup>H} NMR (377 MHz, CDCl<sub>3</sub>) δ<sub>F</sub>: -62.3 (CF<sub>3</sub>).

## 5. Isothiourea-catalysed formal [2+2] cycloaddition of homoanhydrides and pyrazole-4,5-diones

### 5.1. *N*-Benzyl (2'*R*,4*R*)-2-(4-hydroxy-3-methyl-5-oxo-1-phenyl-4,5-dihydro-1*H*-pyrazol-4-yl)-2-phenylacetamide **9**

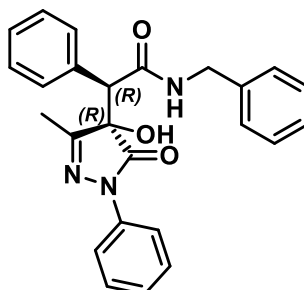

To a solution of 3-methyl-1-phenyl-1*H*-pyrazole-4,5-dione (47.1 mg, 0.25 mmol), 2-phenylacetic anhydride (95.4 mg, 0.375 mmol) and (2*R*,3*S*)-HyperBTM (3.9 mg, 0.125 mmol) were dissolved in ethyl acetate (6 ml, 0.04 M) at 0 °C. Diisopropylethylamine (54  $\mu$ l, 0.31 mmol) was added and the reaction mixture was stirred at 0 °C for 3 h. Benzylamine (82  $\mu$ l, 0.75 mmol) was added and the reaction mixture was stirred for 16 h at rt. The reaction mixture was diluted with ethyl acetate and washed sequentially with 1 M aq. HCl ( $\times 2$ ), sat. aq. NaHCO<sub>3</sub> ( $\times 2$ ), and brine ( $\times 1$ ). The organic layer was dried over MgSO<sub>4</sub>, filtered, and concentrated *in vacuo*. Purification by column chromatography (*n*-hexane : ethyl acetate 4:1 to 3:4) gave the title compound as single diastereomer as a white amorphous solid (62.2 mg, 0.15 mmol, 60%).  $[\alpha]_D^{20} +190.7$  (*c* 0.90, CHCl<sub>3</sub>); **HPLC analysis**: Chiralpak AD-H (90:10 hexane:isopropanol, flow rate 1 ml·min<sup>-1</sup>, 211 nm, 30 °C), *t<sub>R</sub>* (2'*R*,4*R*)-**XX**: 26.4 min, *t<sub>R</sub>* (2'*S*,4*S*)-**XX**: 31.2 min, >99:1 er; **IR**  $\nu_{\max}$  (film) 3316 (O-H), 3063 (C-H), 3032 (C-H), 2024 (C-H), 1717 (C=O, pyrazolone), 1645, 1595, 1499, 1362, 1265, 1128, 750; **<sup>1</sup>H NMR** (500 MHz, CDCl<sub>3</sub>)  $\delta$ <sub>H</sub>: 2.10 (3H, s, CH<sub>3</sub>), 4.05 (1H, s, CHCONHBn), 4.46 (1H, dd, <sup>2</sup>*J*<sub>HH</sub> = 17.8 Hz, <sup>3</sup>*J*<sub>HH</sub> = 6.0 Hz, NHCH<sub>A</sub>H<sub>B</sub>Ph), 4.49 (1H, dd, <sup>2</sup>*J*<sub>HH</sub> = 17.8 Hz, <sup>3</sup>*J*<sub>HH</sub> = 5.8 Hz, NHCH<sub>A</sub>H<sub>B</sub>Ph), 5.97 (1H, app t, <sup>3</sup>*J*<sub>HH</sub> = 5.9 Hz, NH), 7.04 (1H, s, OH), 7.11 (1H, app t, <sup>3</sup>*J*<sub>HH</sub> = 7.4 Hz, NArC<sup>4</sup>H), 7.21 (2H, app d, <sup>3</sup>*J*<sub>HH</sub> = 7.1 Hz, CH<sub>2</sub>ArC<sup>2,6</sup>H), 7.23-7.35 (10H, m, CHArC<sup>2,3,4,5,6</sup>H, NArC<sup>3,5</sup>H, CH<sub>2</sub>ArC<sup>3,4,5</sup>H), 7.49 (2H, d, <sup>3</sup>*J*<sub>HH</sub> = 8.0 Hz, NArC<sup>2,6</sup>H); **<sup>13</sup>C{<sup>1</sup>H} NMR** (126 MHz, CDCl<sub>3</sub>)  $\delta$ <sub>C</sub>: 15.4 (CH<sub>3</sub>), 43.9 (CH<sub>2</sub>Ph), 54.9 (CHCONHBn), 82.3 (C-OH), 119.3 (NArC<sup>2,6</sup>H), 125.5 (NArC<sup>4</sup>H), 127.8 (CH<sub>2</sub>ArC<sup>2,6</sup>H), 128.0 (ArC<sup>4</sup>H), 128.8 (NArC<sup>3,5</sup>H), 129.0 (ArC<sup>3,5</sup>H), 129.3 (ArC<sup>3,5</sup>H), 129.4 (ArC<sup>4</sup>H), 129.8 (CHArC<sup>2,6</sup>H), 131.4 (CHArC<sup>1</sup>), 137.1 (CH<sub>2</sub>ArC<sup>1</sup>), 137.2 (NArC<sup>1</sup>), 160.2 (C=N), 170.6 (C(OH)C=O), 172.6 (CONHBn); **HRMS** (ESI<sup>+</sup>) C<sub>25</sub>H<sub>22</sub>N<sub>3</sub>O<sub>3</sub>Na [M+Na]<sup>+</sup> found 436.16206, requires 436.16316 (-0.3 ppm).

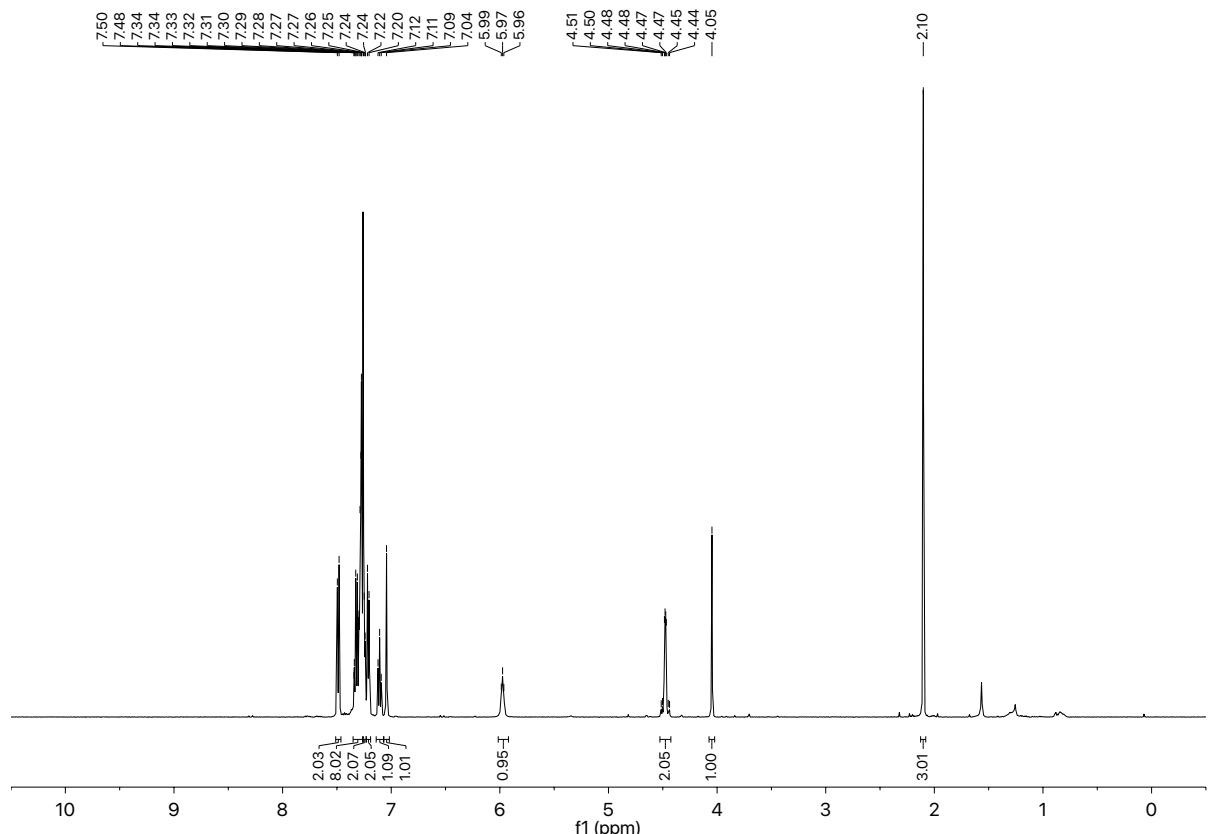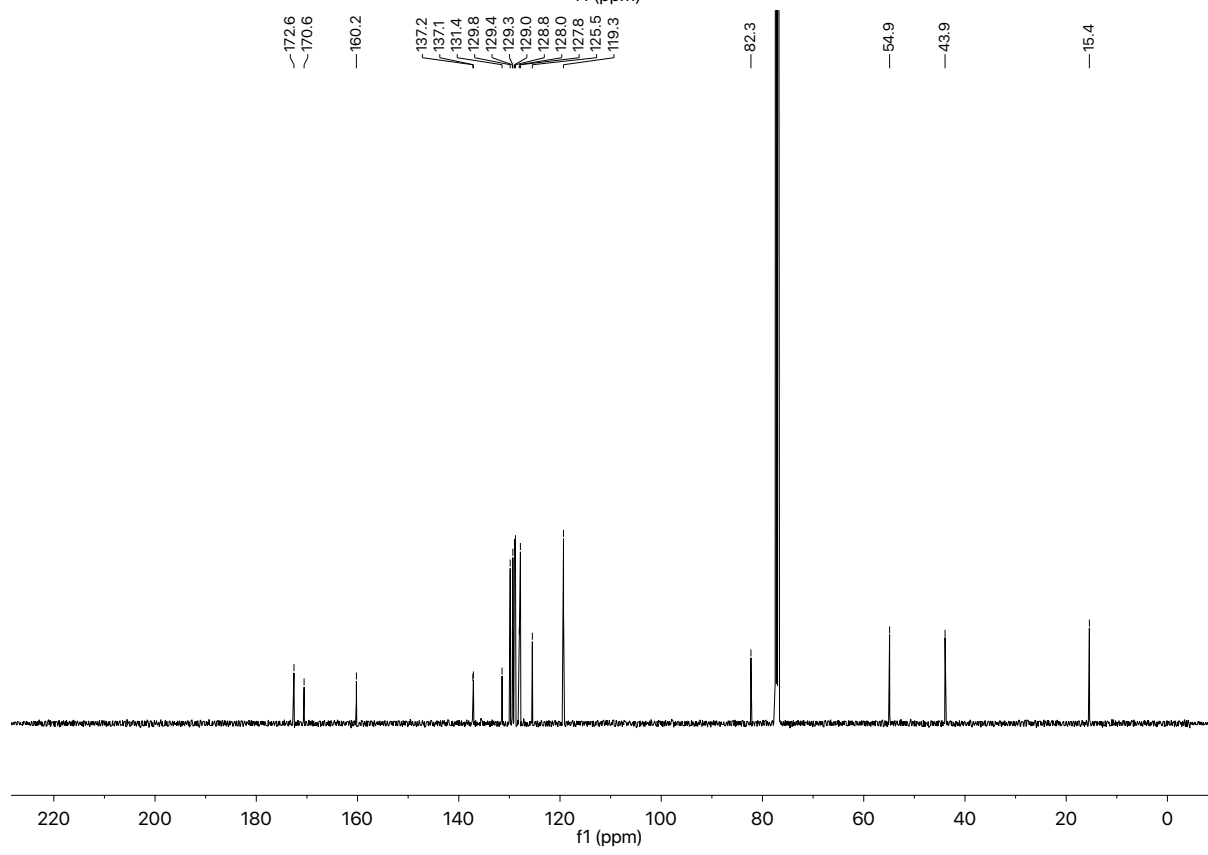

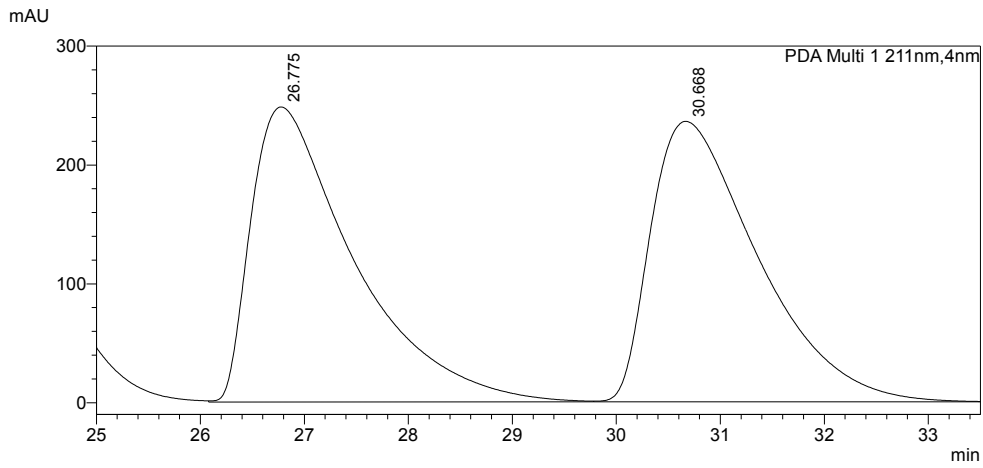

**<Peak Table>**

| PDA Ch1 211nm |           |         |
|---------------|-----------|---------|
| Peak#         | Ret. Time | Area%   |
| 1             | 26.775    | 50.225  |
| 2             | 30.668    | 49.775  |
| Total         |           | 100.000 |

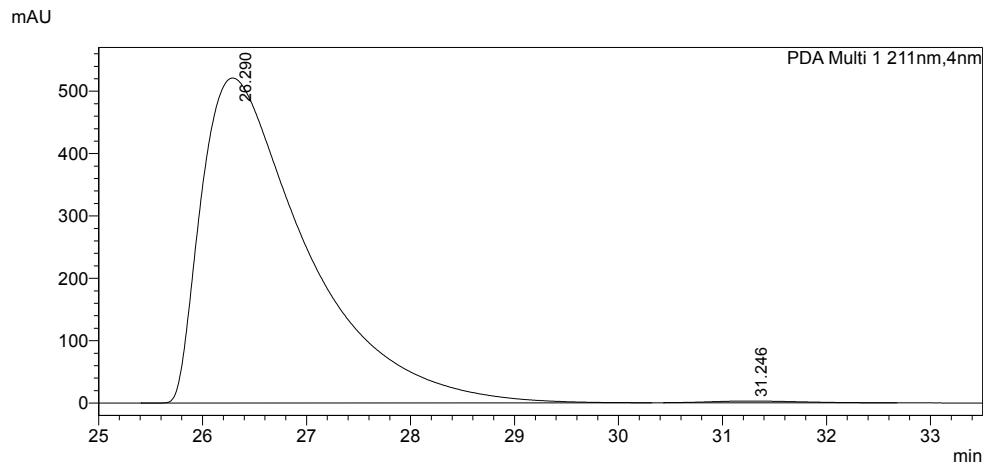

**<Peak Table>**

| PDA Ch1 211nm |           |         |
|---------------|-----------|---------|
| Peak#         | Ret. Time | Area%   |
| 1             | 26.290    | 99.545  |
| 2             | 31.246    | 0.455   |
| Total         |           | 100.000 |

5.2. (1'*R*,4*R*)- and (1'*S*,4*R*)-4-hydroxy-5-methyl-4-(2-oxo-1-phenyl-2-(pyrrolidine-1-yl)ethyl)-1-phenyl-2,4-dihydro-3*H*-pyrazol-3-one **10**

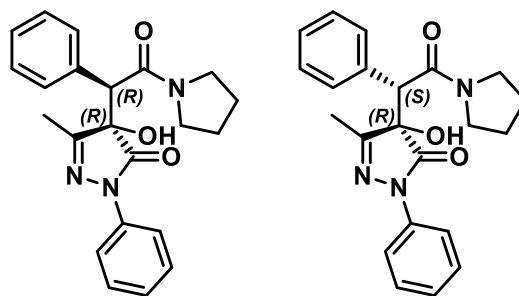

To a solution of 3-methyl-1-phenyl-1*H*-pyrazole-4,5-dione (47.1 mg, 0.25 mmol), 2-phenylacetic anhydride (95.4 mg, 0.375 mmol) and (2*R*,3*S*)-HyperBTM (3.9 mg, 0.125 mmol) were dissolved in ethyl acetate (6 ml, 0.04 M) at 0 °C. Diisopropylethylamine (54  $\mu$ l, 0.31 mmol) was added and the reaction mixture was stirred at 0 °C for 3 h. Pyrrolidine (63  $\mu$ l, 0.75 mmol) was added and the reaction mixture was stirred for 16 h at rt. The reaction mixture was diluted with ethyl acetate and washed sequentially with 1 M aq. HCl ( $\times$ 2), sat. aq. NaHCO<sub>3</sub> ( $\times$ 2), and brine ( $\times$ 1). The organic layer was dried over MgSO<sub>4</sub>, filtered, and concentrated *in vacuo*. Purification by column chromatography (*n*-hexane : ethyl acetate 4:1 to 3:4) gave the title compound as a mixture of diastereomer as a white amorphous solid (72.0 mg, 0.19 mmol, 76%, 89:11 d.r.).  $[\alpha]_D^{20} +254.3$  (c 1.02, CHCl<sub>3</sub>); **IR**  $\nu_{\max}$  (film) 3306 (O-H), 2974 (C-H), 2926 (C-H), 2878 (C-H), 1717 (C=O, pyrazolone), 1622, 1597, 1501, 1443, 1364, 912, 756; **HRMS** (ESI<sup>+</sup>) C<sub>22</sub>H<sub>23</sub>N<sub>3</sub>O<sub>3</sub> [M+H]<sup>+</sup> found 378.18122, requires 378.18020 (-2.7 ppm). *Data for major diastereomer*: **HPLC Analysis**: Chiralpak AD-H (95:5 hexane:isopropanol, flow rate 2 ml·min<sup>-1</sup>, 211 nm, 30 °C),  $t_R$  (1'*R*,4*R*)-**10**: 18.1 min,  $t_R$  (1'*S*,4*S*)-**10**: 21.3 min, >99:1 er; **<sup>1</sup>H NMR** (500 MHz, CDCl<sub>3</sub>)  $\delta_H$ : 1.74-1.91 (7H, m, CH<sub>3</sub>, N(CH<sub>2</sub>CH<sub>2</sub>)<sub>2</sub>), 2.99 (1H, app dt, <sup>2</sup>J<sub>HH</sub> = 10.3 Hz, <sup>3</sup>J<sub>HH</sub> = 6.3 Hz, NCH<sub>A</sub>H<sub>B</sub>CH<sub>2</sub>), 3.38 (1H, app dt, <sup>2</sup>J<sub>HH</sub> = 10.6 Hz, <sup>3</sup>J<sub>HH</sub> = 6.4 Hz, NCH<sub>A</sub>H<sub>B</sub>CH<sub>2</sub>), 3.45 (1H, app dt, <sup>2</sup>J<sub>HH</sub> = 12.9 Hz, <sup>3</sup>J<sub>HH</sub> = 6.6 Hz, NCH<sub>C</sub>H<sub>D</sub>CH<sub>2</sub>), 3.67 (1H, app dt, <sup>2</sup>J<sub>HH</sub> = 12.8 Hz, <sup>3</sup>J<sub>HH</sub> = 6.5 Hz, NCH<sub>C</sub>H<sub>D</sub>CH<sub>2</sub>), 3.99 (1H, s, CHCON(CH<sub>2</sub>CH<sub>2</sub>)<sub>2</sub>), 7.07 (1H, br s, OH), 7.17 (1H, app t, <sup>3</sup>J<sub>HH</sub> = 7.4 Hz, NArC<sup>4</sup>H), 7.30-7.39 (7H, m, NArC<sup>3,5</sup>H, CHArC<sup>2,3,4,5,6</sup>H), 7.74 (2H, app d, <sup>3</sup>J<sub>HH</sub> = 8.0 Hz, NArC<sup>2,6</sup>H); **<sup>13</sup>C{<sup>1</sup>H} NMR** (126 MHz, CDCl<sub>3</sub>)  $\delta_C$ : 15.4 (CH<sub>3</sub>), 24.1 (NCH<sub>2</sub>CH<sub>C</sub>H<sub>D</sub>), 26.0 (NCH<sub>2</sub>CH<sub>A</sub>H<sub>B</sub>), 46.4 (NCH<sub>C</sub>H<sub>D</sub>CH<sub>2</sub>), 46.9 (NCH<sub>A</sub>H<sub>B</sub>CH<sub>2</sub>), 53.2 (CHCON(CH<sub>2</sub>H<sub>2</sub>)<sub>2</sub>), 81.9 (C-OH), 119.1 (NArC<sup>2,6</sup>H), 125.3 (NArC<sup>4</sup>H), 128.8 (CHArC<sup>4</sup>H), 128.9 (ArCH), 129.2 (ArCH), 129.2 (ArCH), 132.2 (CHArC<sup>1</sup>), 137.7 (NArC<sup>1</sup>), 160.9 (C=N), 170.2 (CON(CH<sub>2</sub>CH<sub>2</sub>)<sub>2</sub>), 172.2 (CONAr); *Data for minor diastereomer*: **<sup>1</sup>H NMR** (500 MHz, CDCl<sub>3</sub>) (*selected*)  $\delta_H$ : 2.13 (3H, s, CH<sub>3</sub>), 3.54 (1H, app dt, <sup>2</sup>J<sub>HH</sub> = 12.7 Hz, <sup>3</sup>J<sub>HH</sub> = 6.4 Hz, NCH<sub>A</sub>H<sub>B</sub>CH<sub>2</sub>), 3.85 (1H, s, CHCON(CH<sub>2</sub>CH<sub>2</sub>)<sub>2</sub>); **<sup>13</sup>C{<sup>1</sup>H} NMR** (126 MHz, CDCl<sub>3</sub>) (*selected*)  $\delta_C$ : 14.7 (CH<sub>3</sub>), 53.0



(CH), 80.9 (C-OH), 118.9 (NArC<sup>2,6</sup>H), 125.0 (NArC<sup>4</sup>H), 128.6 (ArCH), 130.0 (ArCH), 137.9 (NArC<sup>1</sup>).

The minor diastereomer could not be resolved on HPLC.

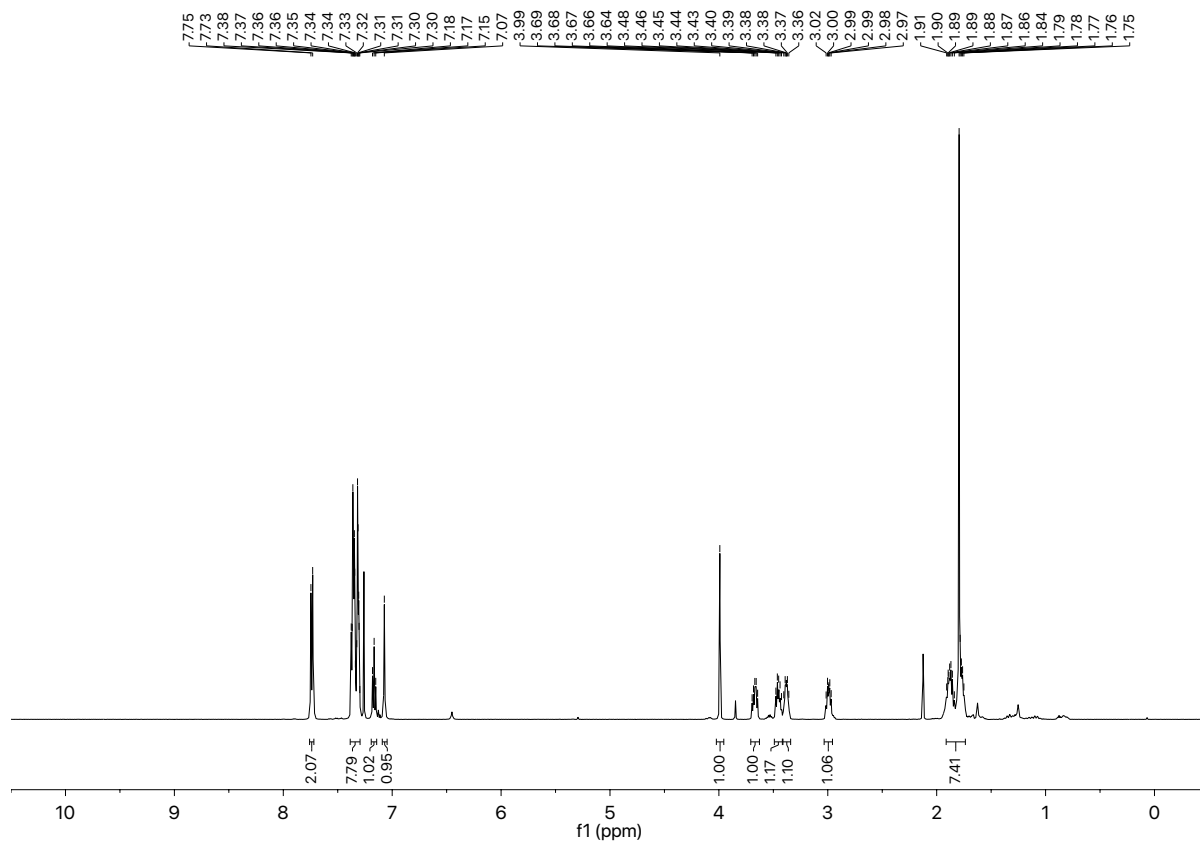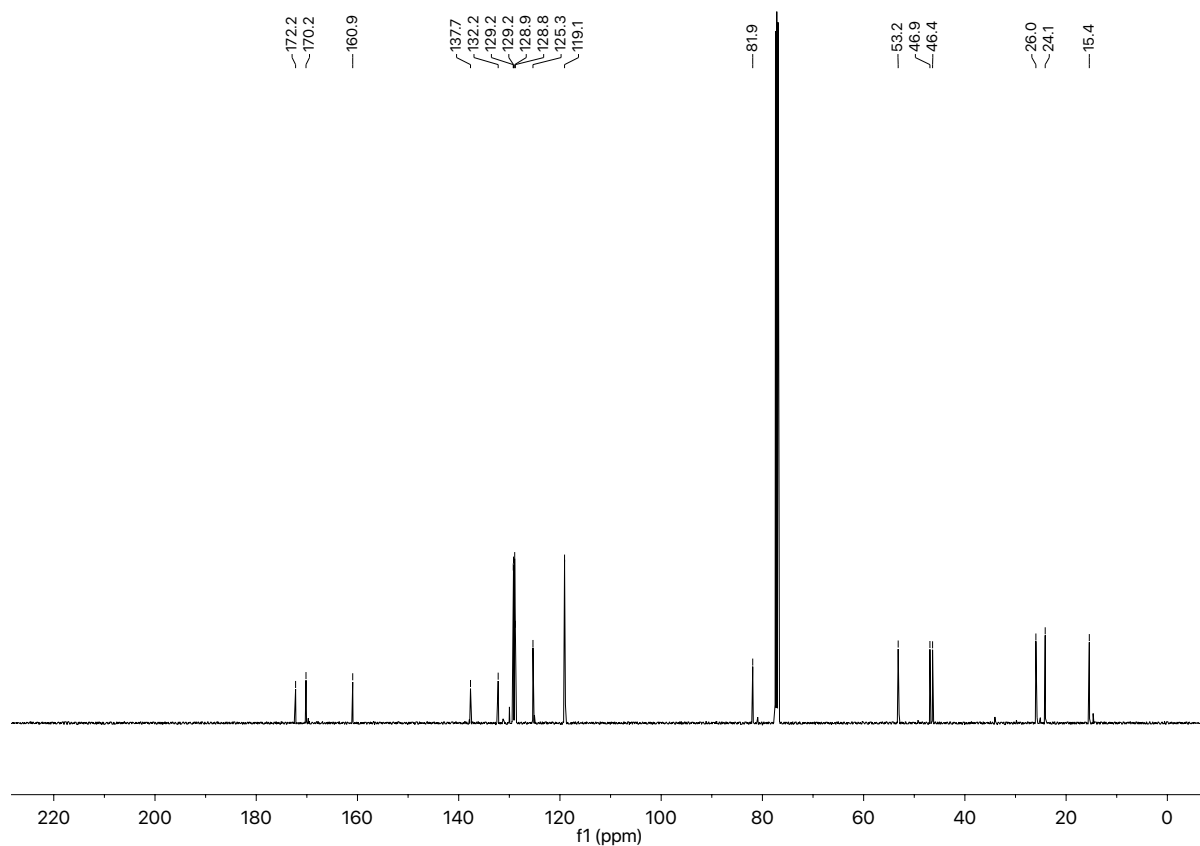

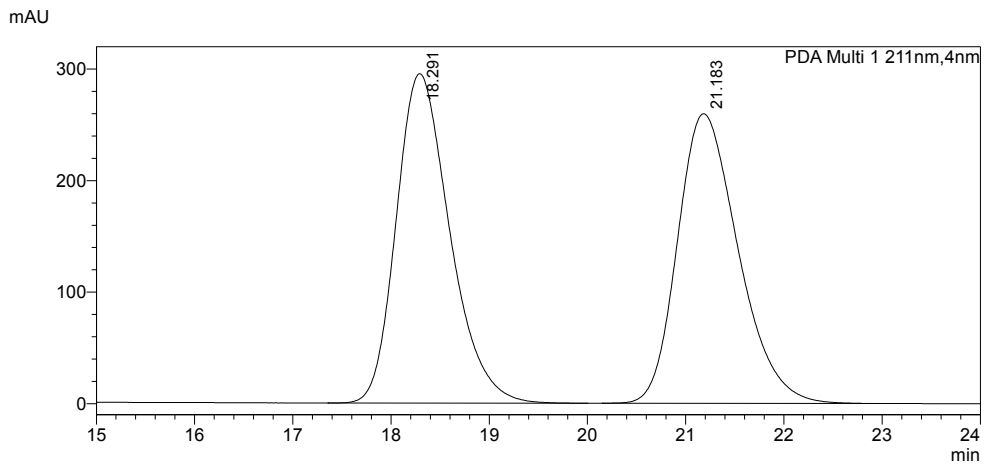

**<Peak Table>**

| PDA Ch1 211nm |           |         |
|---------------|-----------|---------|
| Peak#         | Ret. Time | Area%   |
| 1             | 18.291    | 50.084  |
| 2             | 21.183    | 49.916  |
| Total         |           | 100.000 |

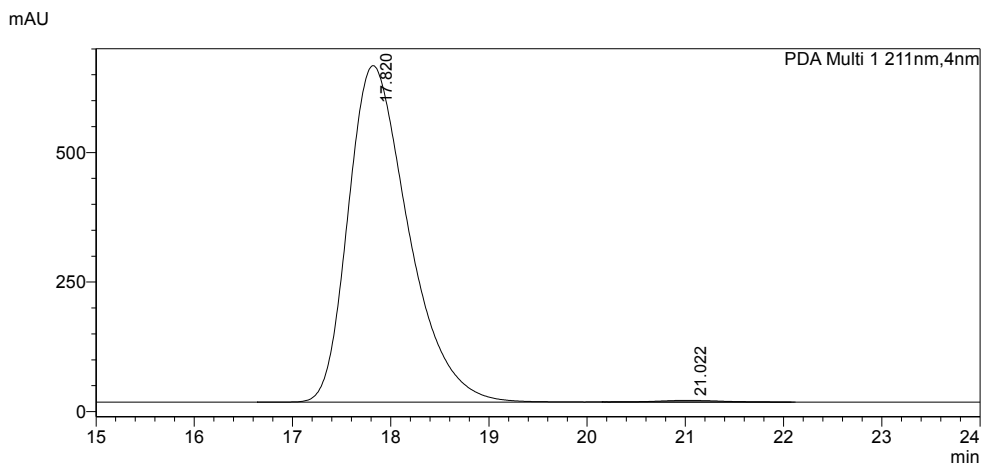

**<Peak Table>**

| PDA Ch1 211nm |           |         |
|---------------|-----------|---------|
| Peak#         | Ret. Time | Area%   |
| 1             | 17.820    | 99.486  |
| 2             | 21.022    | 0.514   |
| Total         |           | 100.000 |

5.3. (1'*R*,4*R*)- and (1'*S*,4*R*)-4-Hydroxy-5-methyl-4-(2-morpholino-2-oxo-1-phenylethyl)-2-phenyl-2,4-dihydro-3*H*-pyrazol-3-one **11**

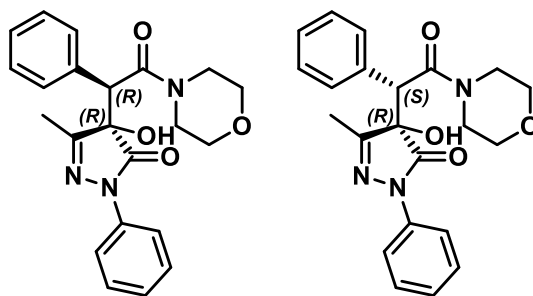

To a solution of 3-methyl-1-phenyl-1*H*-pyrazole-4,5-dione (47.1 mg, 0.25 mmol), 2-phenylacetic anhydride (95.4 mg, 0.375 mmol) and (2*R*,3*S*)-HyperBTM (3.9 mg, 0.125 mmol) were dissolved in ethyl acetate (6 ml, 0.04 M) at 0 °C. Diisopropylethylamine (54  $\mu$ l, 0.31 mmol) was added and the reaction mixture was stirred at 0 °C for 3 h. Morpholine (66  $\mu$ l, 0.75 mmol) was added and the reaction mixture was stirred for 16 h at rt. The reaction mixture was diluted with ethyl acetate and washed sequentially with 1 M aq. HCl ( $\times$ 2), sat. aq. NaHCO<sub>3</sub> ( $\times$ 2), and brine ( $\times$ 1). The organic layer was dried over MgSO<sub>4</sub>, filtered, and concentrated *in vacuo*. Purification by column chromatography (*n*-hexane : ethyl acetate 4:1 to 3:4) gave the title compound as a mixture of diastereomer as a white amorphous solid (78.1 mg, 0.20 mmol, 79%, 92:8 d.r.).  $[\alpha]_D^{20} +247.8$  (c 1.00, CDCl<sub>3</sub>); **IR**  $\nu_{\max}$  (film) 3356 (O-H), 2967 (C-H), 2924 (C-H), 2857 (C-H), 1717 (C=O, pyrazolone), 1639, 1622, 1597, 1501, 1115, 754; **HRMS** (ESI<sup>+</sup>) C<sub>22</sub>H<sub>23</sub>N<sub>3</sub>O<sub>4</sub> [M+H]<sup>+</sup> found 394.17540, requires 394.17613 (−0.2 ppm). *Data for major diastereomer: HPLC Analysis:* Chiralpak AD-H (85:15 hexane:isopropanol, flow rate 2.0 ml·min<sup>−1</sup>, 211 nm, 30 °C)  $t_R$  (1'*R*,4*R*)-**11**: 8.0 min,  $t_R$  (1'*S*,4*S*)-**11**: 9.6 min, >99:1 er; **<sup>1</sup>H NMR** (500 MHz, CDCl<sub>3</sub>)  $\delta_H$ : 1.95 (3H, s, CH<sub>3</sub>), 3.07-3.19 (2H, m, NCH<sub>A</sub>H<sub>B</sub>CH<sub>2</sub>, NCH<sub>2</sub>CH<sub>A</sub>H<sub>B</sub>), 3.33 (1H, ddd, <sup>2</sup> $J_{HH} = 14.7$  Hz, <sup>3</sup> $J_{HH} = 7.7$  Hz, 4.2 Hz, NCH<sub>A</sub>H<sub>B</sub>CH<sub>2</sub>), 3.45-3.51 (1H, m, NCH<sub>2</sub>CH<sub>A</sub>H<sub>B</sub>), 3.54-3.68 (2H, m, NCH<sub>C</sub>H<sub>D</sub>CH<sub>2</sub>, NCH<sub>2</sub>CH<sub>C</sub>H<sub>D</sub>), 3.69-3.78 (2H, m, NCH<sub>C</sub>H<sub>D</sub>CH<sub>2</sub>, NCH<sub>2</sub>CH<sub>C</sub>H<sub>D</sub>), 4.22 (1H, s, CHPh), 6.36 (1H, br s, OH), 7.17 (1H, app t, <sup>3</sup> $J_{HH} = 7.4$  Hz, NArC<sup>4</sup>H), 7.24-7.28 (2H, m, CHArC<sup>3,5</sup>H), 7.28-7.32 (3H, m, CHArC<sup>2,4,6</sup>H), 7.35 (2H, app t, <sup>3</sup> $J_{HH} = 7.9$  Hz, NArC<sup>3,5</sup>H), 7.70 (2H, app d, <sup>3</sup> $J_{HH} = 8.0$  Hz, NArC<sup>2,6</sup>H); **<sup>13</sup>C{<sup>1</sup>H} NMR** (126 MHz, CDCl<sub>3</sub>)  $\delta_C$ : 15.7 (CH<sub>3</sub>), 42.5 (NCH<sub>C</sub>H<sub>D</sub>CH<sub>2</sub>), 46.6 (NCH<sub>A</sub>H<sub>B</sub>CH<sub>2</sub>), 52.5 (CHPh), 66.1 (NCH<sub>2</sub>CH<sub>A</sub>H<sub>B</sub>), 66.6 (NCH<sub>2</sub>CH<sub>C</sub>H<sub>D</sub>), 81.7 (C-OH), 119.1 (NArC<sup>2,6</sup>H), 125.4 (NArC<sup>4</sup>H), 128.7 (CHArC<sup>3,5</sup>H), 128.9 (NArC<sup>3,5</sup>H), 129.0 (CHArC<sup>4</sup>H), 129.4 (CHArC<sup>2,6</sup>H), 132.0 (CHArC<sup>1</sup>), 137.5 (NArC<sup>1</sup>), 160.8 (C=N), 170.2 (CON(CH<sub>2</sub>CH<sub>2</sub>)<sub>2</sub>O), 171.7 (CONAr); *Data for minor diastereomer: HPLC Analysis:* Chiralpak AD-H (85:15 hexane:isopropanol, flow rate 2.0 ml·min<sup>−1</sup>, 211 nm, 30 °C)  $t_R$  (1'*S*,4*R*)-**11**: 6.9 min,  $t_R$  (1'*R*,4*S*)-**11**: 13.1 min, >99:1 er; **<sup>1</sup>H NMR** (500 MHz, CDCl<sub>3</sub>) (*selected*)  $\delta_H$ : 2.00 (3H, s, CH<sub>3</sub>), 3.02 (1H, ddd, <sup>2</sup> $J_{HH} = 10.5$  Hz, <sup>3</sup> $J_{HH} = 5.1$  Hz, 2.7 Hz, NCH<sub>2</sub>CH<sub>C</sub>H<sub>D</sub>), 4.16 (1H, s, CHPh), 5.36 (1H, br s, OH); **<sup>13</sup>C{<sup>1</sup>H} NMR** (126 MHz, CDCl<sub>3</sub>) (*selected*)

$\delta_c$ : 14.8 (CH<sub>3</sub>), 42.3 (NCH<sub>2</sub>CH<sub>2</sub>), 46.5 (NCH<sub>2</sub>CH<sub>2</sub>), 52.9 (CHPh), 80.3 (C-OH), 118.9 (NArC<sup>2,6</sup>H), 125.1 (NArC<sup>4</sup>H), 128.8 (ArCH), 129.7 (ArCH), 131.8 (CHArC<sup>1</sup>), 137.8 (NArC<sup>1</sup>), 160.3 (C=N), 169.2 (CON(CH<sub>2</sub>CH<sub>2</sub>)<sub>2</sub>O), 171.1 (CONAr).

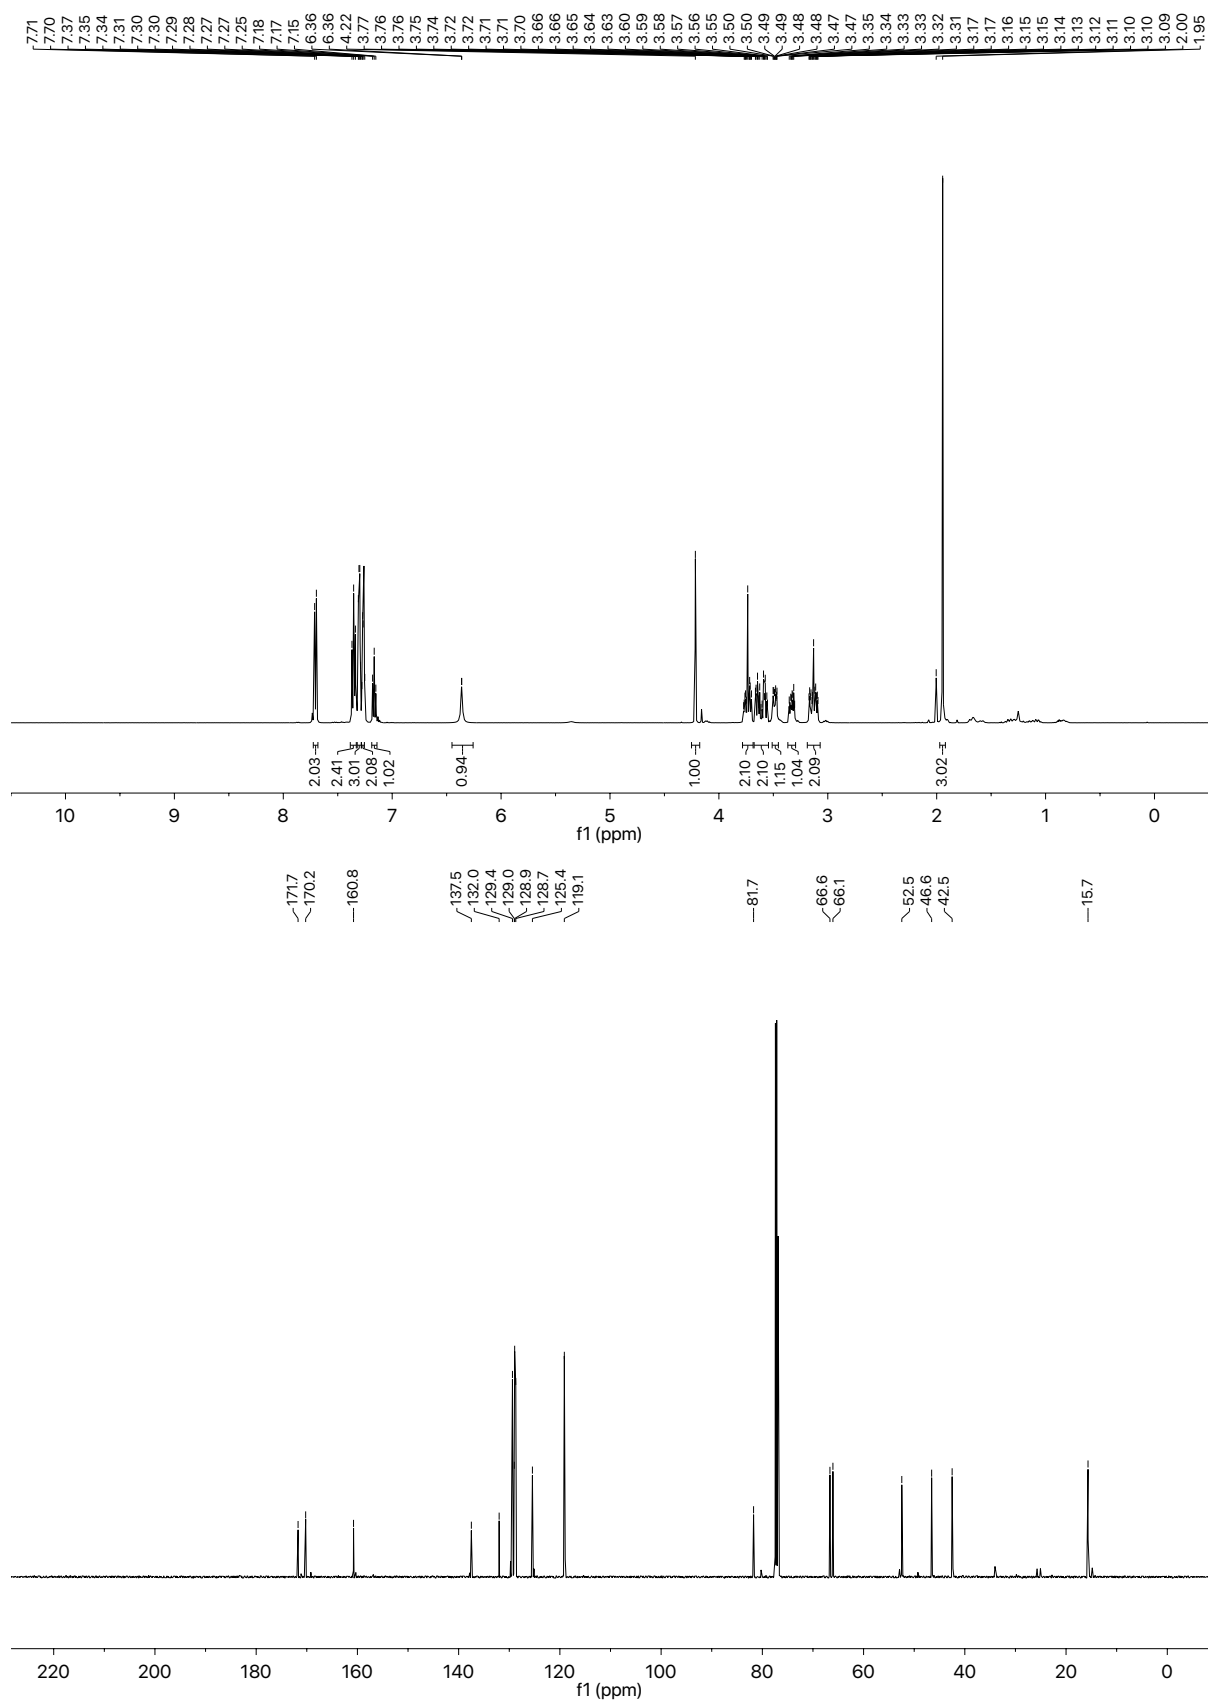

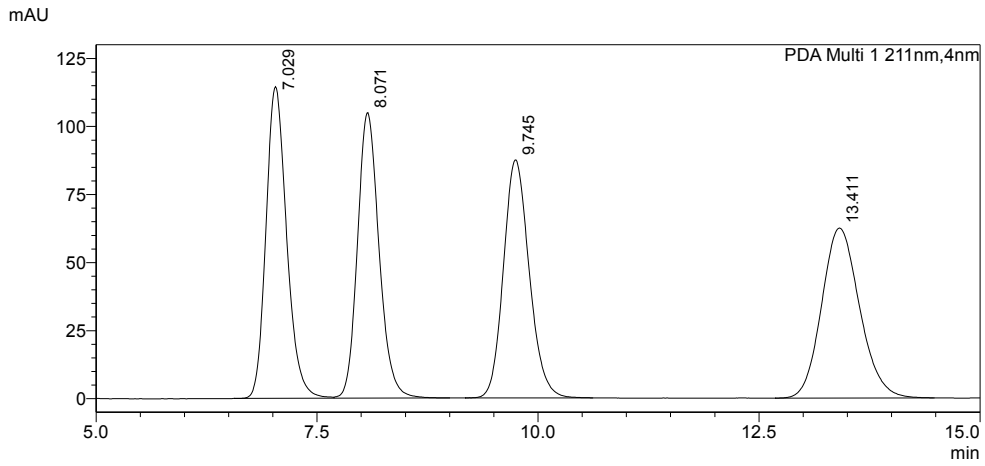

**<Peak Table>**

| PDA Ch1 211nm |           |         |
|---------------|-----------|---------|
| Peak#         | Ret. Time | Area%   |
| 1             | 7.029     | 25.601  |
| 2             | 8.071     | 24.455  |
| 3             | 9.745     | 24.356  |
| 4             | 13.411    | 25.587  |
| Total         |           | 100.000 |

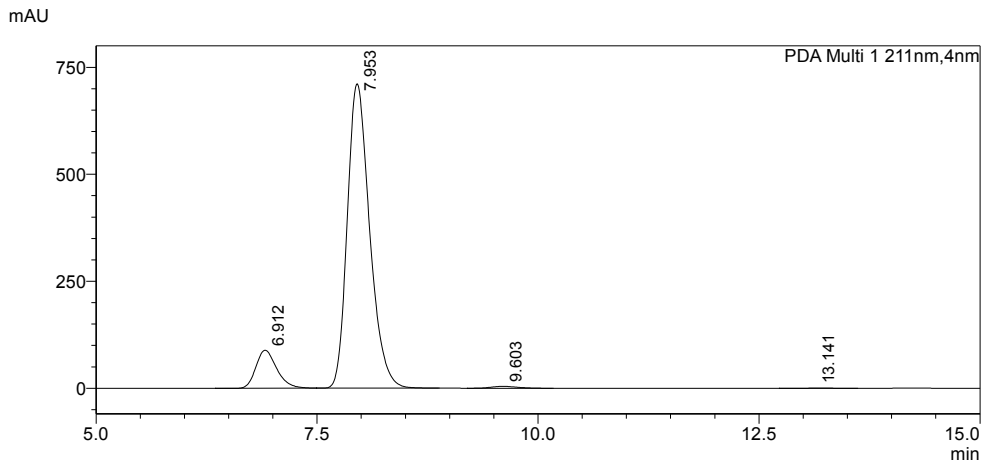

**<Peak Table>**

| PDA Ch1 211nm |           |         |
|---------------|-----------|---------|
| Peak#         | Ret. Time | Area%   |
| 1             | 6.912     | 10.344  |
| 2             | 7.953     | 88.922  |
| 3             | 9.603     | 0.661   |
| 4             | 13.141    | 0.073   |
| Total         |           | 100.000 |

5.4. (3'*R*,4*R*)-3-Methyl-3'-(naphth-1-yl)-1-phenyl-spiro[pyrazolin[5]one-4.2-oxetan[4]one] **12** and (3'*S*,4*R*)-3-Methyl-3'-(naphth-1-yl)-1-phenyl-spiro[pyrazolin[5]one-4.2-oxetan[4]one] **13**

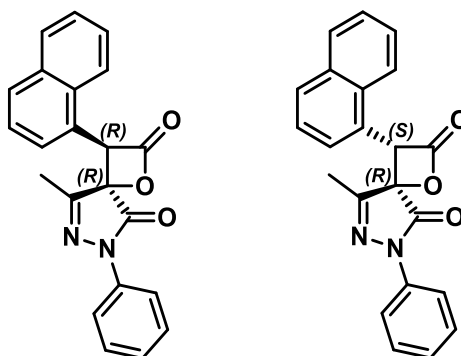

To a solution of 3-methyl-1-(naphth-1-yl)-1*H*-pyrazole-4,5-dione (47.1 mg, 0.25 mmol), 2-(naphth-1-yl)acetic anhydride (132.9 mg, 0.375 mmol) and (2*R*,3*S*)-HyperBTM (3.9 mg, 0.125 mmol) were dissolved in ethyl acetate (6 ml, 0.04 M) at 0 °C. Diisopropylethylamine (54  $\mu$ l, 0.31 mmol) was added and the reaction mixture was stirred at 0 °C for 3 h. The solvent was removed and the crude reaction mixture was purified by column chromatography (*n*-hexane : ethyl acetate 100:0 to 4:1) to give the title compounds in two fractions: The major diastereomer (40.9 mg, 46%, >95:5 dr) as a white amorphous solid, and a mixture of diastereomers (23.7 mg, 27%, 7:93 dr) as a yellow crystalline solid; combined (64.6 mg, 73%, 66:34 dr). *Data for major diastereomer*:  $[\alpha]_D^{20} +179.5$  (c 1.00, CHCl<sub>3</sub>); **HPLC Analysis**: Chiralpak AD-H (99:1 hexane:isopropanol, flow rate 2.00 ml·min<sup>-1</sup>, 211 nm, 30 °C)  $t_R$  (3'*R*,4*R*)-**12**: 22.6 min,  $t_R$  (3'*S*,4*S*)-**12**: 19.6 min, 99:1 er; **IR**  $\nu_{max}$  (film) 3063, 2359, 1854 (C=O, lactone), 1724 (C=O, pyrazolone), 1597, 1501, 1369, 1319, 1121, 930, 775, 758; **<sup>1</sup>H NMR** (500 MHz, CDCl<sub>3</sub>)  $\delta_H$ : 1.41 (3H, s, CH<sub>3</sub>), 6.01 (1H, s, CHCOO), 7.17 (1H, app d, <sup>3</sup> $J_{HH}$  = 8.4 Hz, CHArC<sup>8</sup>H), 7.30 (1H, app tt, <sup>3</sup> $J_{HH}$  = 7.3 Hz, <sup>4</sup> $J_{HH}$  = 1.2 Hz, NArC<sup>4</sup>H), 7.35 (1H, ddd, <sup>3</sup> $J_{HH}$  = 8.4 Hz, 6.9 Hz, <sup>4</sup> $J_{HH}$  = 1.2 Hz, CHArC<sup>7</sup>H), 7.45-7.57 (4H, m, CHArC<sup>3</sup>H + NArC<sup>3,5</sup>H + CHArC<sup>6</sup>H), 7.83 (1H, app dt, <sup>3</sup> $J_{HH}$  = 7.1 Hz, <sup>4</sup> $J_{HH}$  = 1.2 Hz, CHArC<sup>2</sup>H), 7.84-7.87 (2H, m, NArC<sup>2,6</sup>H), 7.91 (1H, app d, <sup>3</sup> $J_{HH}$  = 8.5 Hz, CHArC<sup>5</sup>H), 7.93(1H, app d, <sup>3</sup> $J_{HH}$  = 8.4 Hz, CHArC<sup>4</sup>H); **<sup>13</sup>C{<sup>1</sup>H} NMR** (126 MHz, CDCl<sub>3</sub>)  $\delta_C$ : 14.2 (CH<sub>3</sub>), 63.6 (CHCOO), 78.0 (CC(O)N), 119.2 (NArC<sup>2,6</sup>H), 121.4 (CHArC<sup>8</sup>H), 124.7 (CHArC<sup>1</sup>), 125.4 (CHArC<sup>2</sup>H), 125.5 (CHArC<sup>3</sup>H), 126.3 (NArC<sup>4</sup>H), 127.1 (CHArC<sup>6</sup>H), 127.7 (CHArC<sup>7</sup>H), 129.3 (NArC<sup>3,5</sup>H), 129.5 (CHArC<sup>5</sup>H), 130.1 (CHArC<sup>8a</sup>), 130.3 (CHArC<sup>4</sup>H), 133.9 (CHArC<sup>4a</sup>), 137.3 (NArC<sup>1</sup>), 155.6 (C=N), 165.5 (COO), 167.2 (C(O)N); **HRMS** (ESI<sup>+</sup>) C<sub>22</sub>H<sub>16</sub>N<sub>2</sub>O<sub>3</sub>Na [M+Na]<sup>+</sup> found 379.1045, requires 379.1053 (-2.2 ppm); *Data for minor diastereomer (characterised as a 90:10 dr mixture)*: mp 158-160 °C (*dec*);  $[\alpha]_D^{20} +448.5$  (c 0.36, CHCl<sub>3</sub>); Chiralpak AD-H (99:1 hexane:isopropanol, flow rate 2.00 ml·min<sup>-1</sup>, 211 nm, 30 °C)  $t_R$  (3'*S*,4*R*)-**13**: 58.9 min,  $t_R$  (3'*R*,4*S*)-**13**: 35.9 min, >99:1 er; **IR**  $\nu_{max}$  (film) 3063, 1850 (C=O, lactone), 1732 (C=O, pyrazolone), 1597, 1501, 1371, 1314, 1119,

932, 781, 756;  $^1\text{H NMR}$  (500 MHz,  $\text{CDCl}_3$ )  $\delta_{\text{H}}$ : 2.62 (3H, s,  $\text{CH}_3$ ), 5.95 (1H, s,  $\text{CHCOO}$ ), 7.08 (1H, t,  $^3J_{\text{HH}} = 7.4$  Hz,  $\text{NArC}^4\text{H}$ ), 7.13 (1H, d,  $^3J_{\text{HH}} = 8.2$  Hz,  $\text{CHArC}^8\text{H}$ ), 7.21 (2H, app t,  $^3J_{\text{HH}} = 8.0$  Hz,  $\text{NArC}^{3,5}\text{H}$ ), 7.29-7.33 (2H, m,  $\text{NArC}^{2,6}\text{H}$ ), 7.36-7.44 (2H, m,  $\text{CHArC}^7\text{H} + \text{CHArC}^6\text{H}$ ), 7.54 (1H, app t,  $^3J_{\text{HH}} = 7.7$  Hz,  $\text{CHArC}^3\text{H}$ ), 7.83-7.91 (3H, m,  $\text{CHArC}^2\text{H} + \text{CHArC}^4\text{H} + \text{CHArC}^5\text{H}$ );  $^{13}\text{C}\{^1\text{H}\}$   $\text{NMR}$  (126 MHz,  $\text{CDCl}_3$ )  $\delta_{\text{C}}$ : 13.2 ( $\text{CH}_3$ ), 61.6 ( $\text{CHCOO}$ ), 77.9 ( $\text{CC(O)N}$ ), 119.0 ( $\text{NArC}^{2,6}\text{H}$ ), 120.7 ( $\text{CHArC}^8\text{H}$ ), 123.7 ( $\text{CHArC}^1$ ), 125.6 ( $\text{CHArC}^3\text{H}$ ), 125.9 ( $\text{NArC}^4\text{H}$ ), 126.4 ( $\text{CHArC}^6\text{H}$ ), 127.4 ( $\text{CHArC}^7\text{H}$ ), 127.6 ( $\text{CHArC}^2\text{H}$ ), 128.9 ( $\text{NArC}^{3,5}\text{H}$ ), 129.6 ( $\text{CHArC}^5\text{H}$ ), 130.1 ( $\text{CHArC}^4\text{H}$ ), 130.2 ( $\text{CHArC}^{8\text{a}}$ ), 133.8 ( $\text{CHArC}^{4\text{a}}$ ), 136.9 ( $\text{NArC}^1$ ), 155.2 ( $\text{C=N}$ ), 164.8 ( $\text{COO}$ ), 165.3 ( $\text{CONAr}$ ).

**Note:** Upon storage of *syn*- and **12** under air at room temperature a gradual colour change from white to orange was observed. Following  $^1\text{H NMR}$  analysis of these compounds after approximately one month some decomposition of **12** was observed, whilst no decomposition of **13** was apparent.

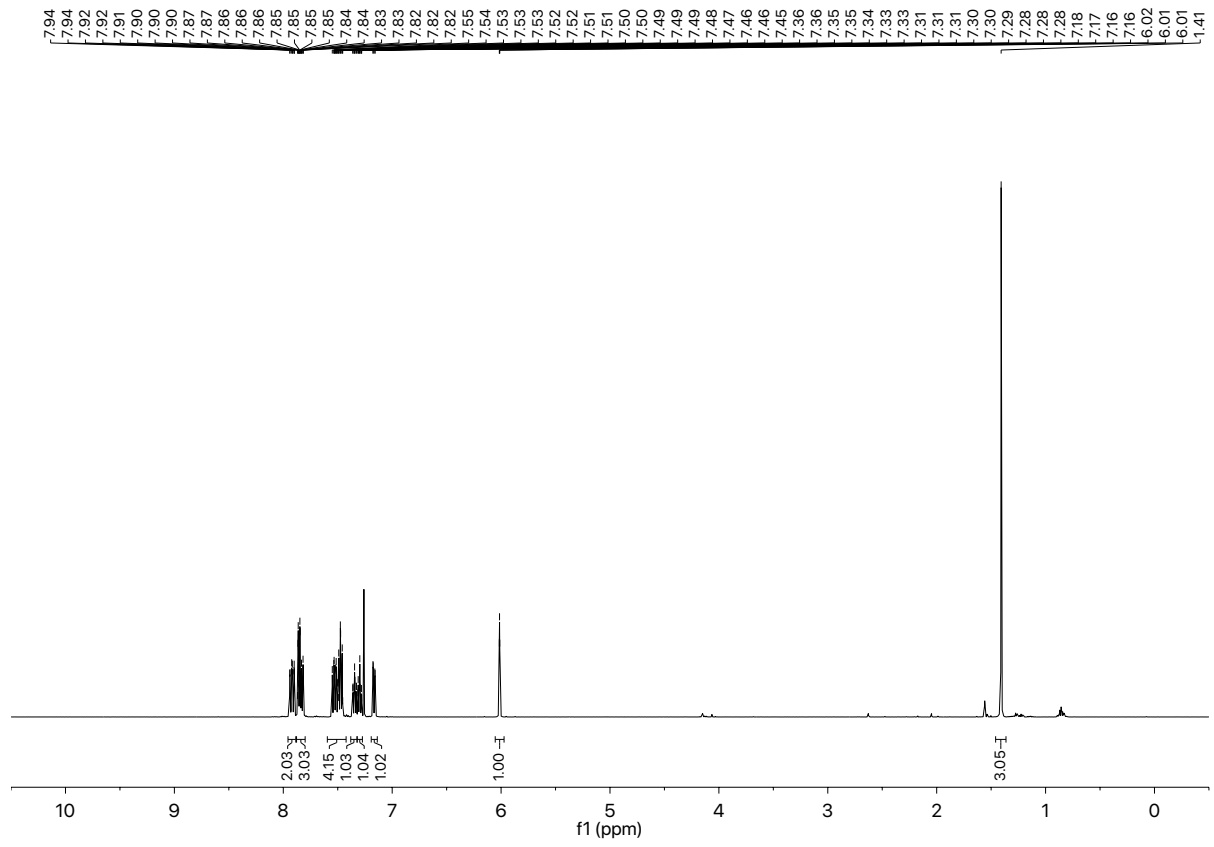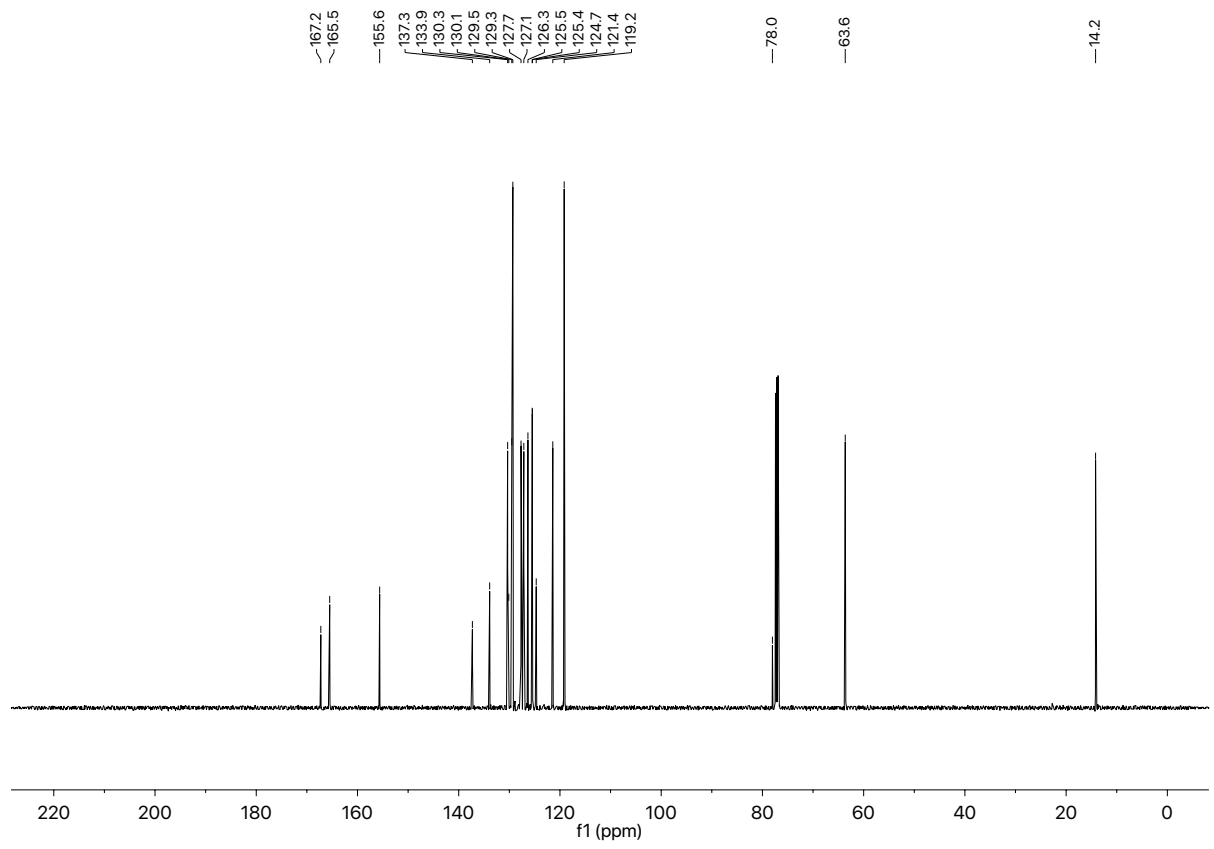



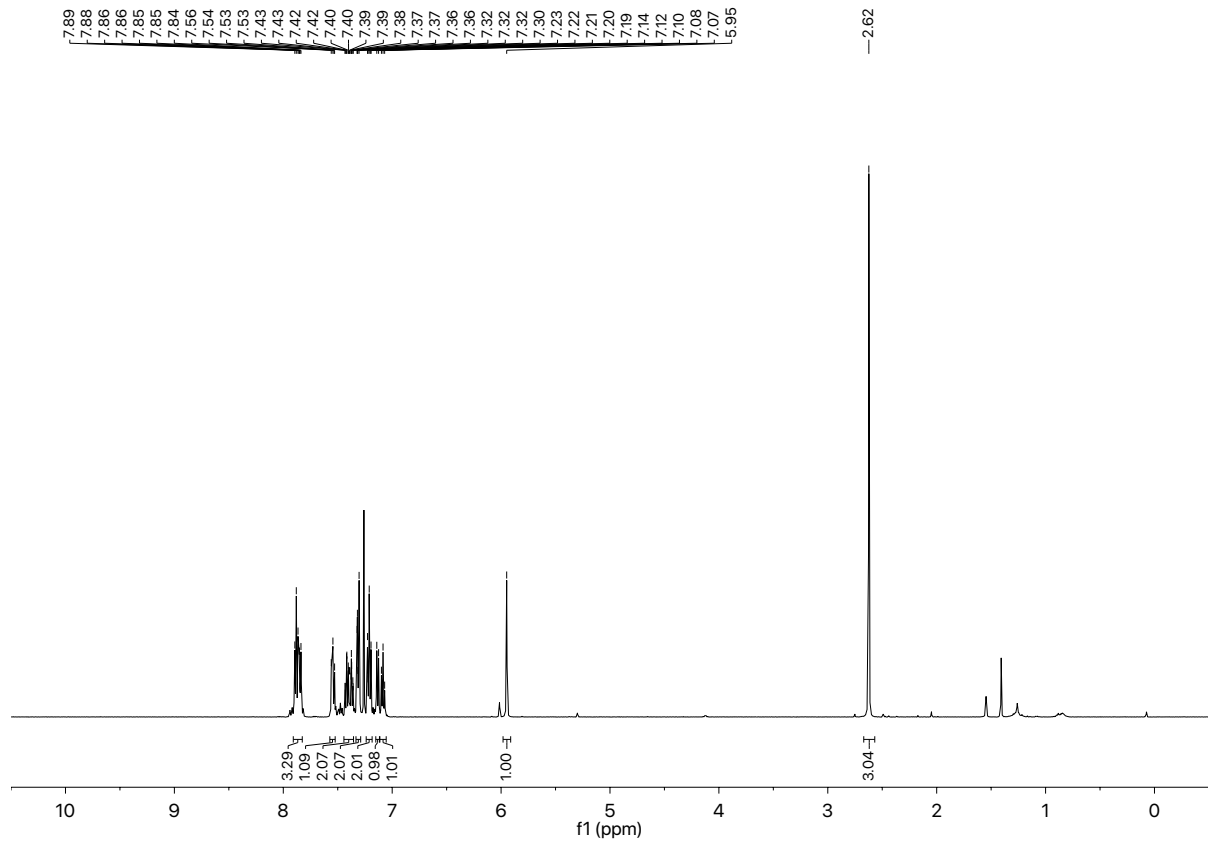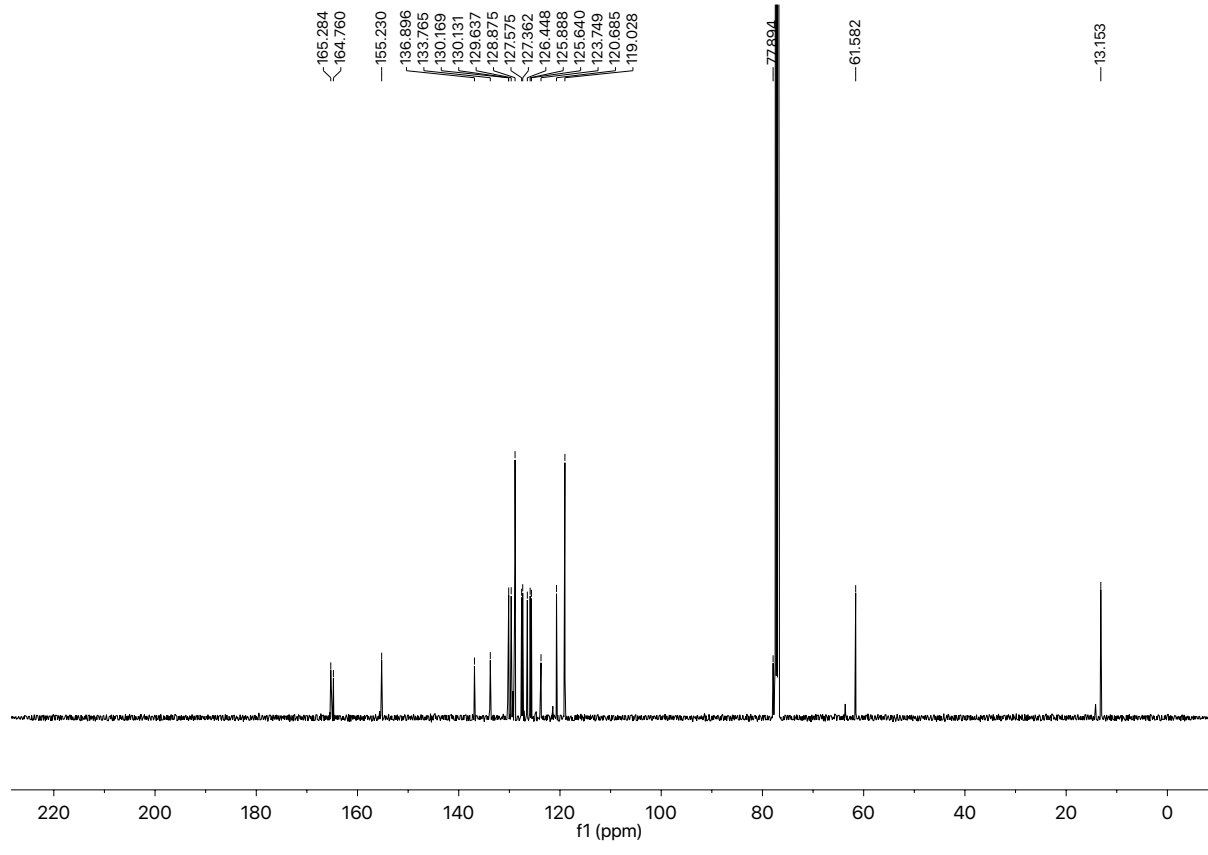

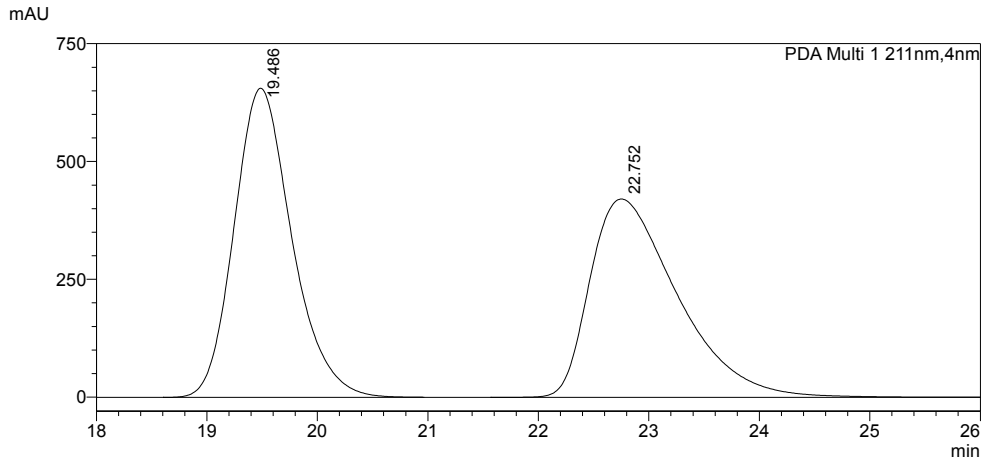

**<Peak Table>**

PDA Ch1 211nm

| Peak# | Ret. Time | Area%   |
|-------|-----------|---------|
| 1     | 19.486    | 50.611  |
| 2     | 22.752    | 49.389  |
| Total |           | 100.000 |

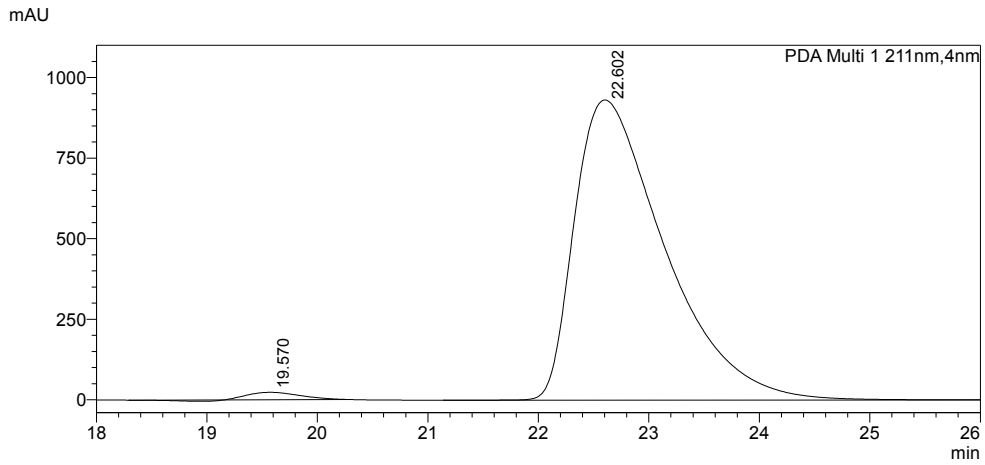

**<Peak Table>**

PDA Ch1 211nm

| Peak# | Ret. Time | Area%   |
|-------|-----------|---------|
| 1     | 19.570    | 1.199   |
| 2     | 22.602    | 98.801  |
| Total |           | 100.000 |

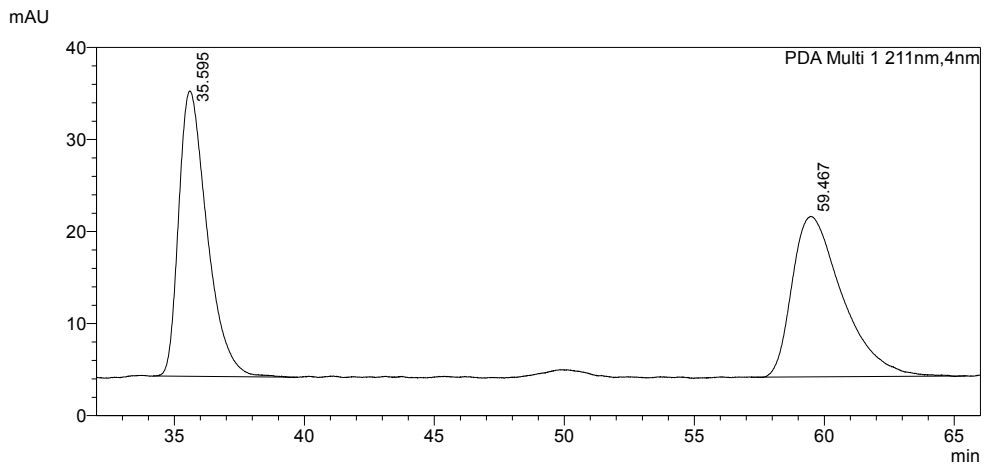

**<Peak Table>**

| PDA Ch1 211nm |           |         |
|---------------|-----------|---------|
| Peak#         | Ret. Time | Area%   |
| 1             | 35.595    | 50.197  |
| 2             | 59.467    | 49.803  |
| Total         |           | 100.000 |

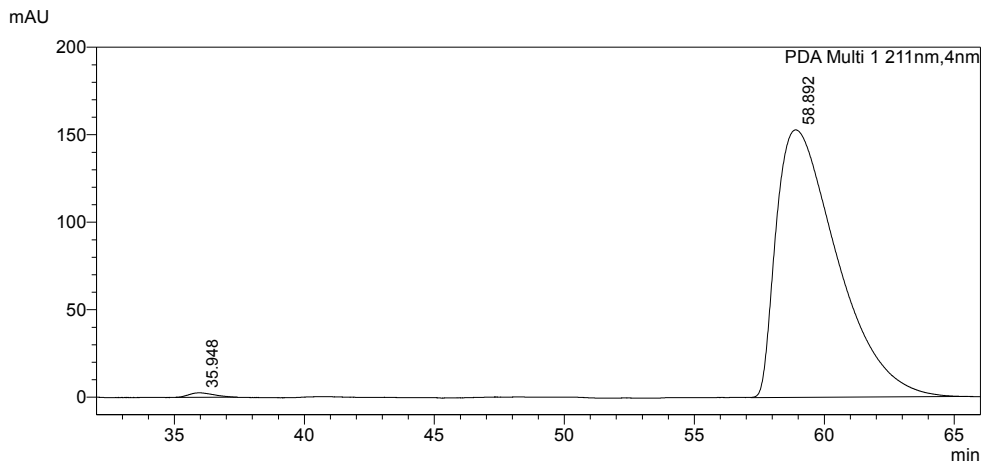

**<Peak Table>**

| PDA Ch1 211nm |           |         |
|---------------|-----------|---------|
| Peak#         | Ret. Time | Area%   |
| 1             | 35.948    | 0.684   |
| 2             | 58.892    | 99.316  |
| Total         |           | 100.000 |

5.5. (1'*R*,4*R*)- and (1'*S*,4*R*)-4-hydroxy-5-methyl-4-(2-morpholino-1-( $\alpha$ -naphthyl)-2-oxoethyl)-2-phenyl-2,4-dihydro-3*H*-pyrazol-3-one **14**

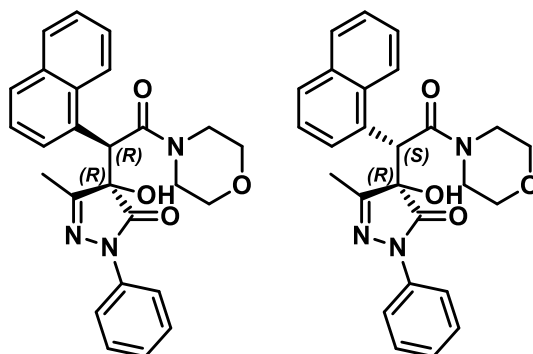

To a solution of 3-methyl-1-phenyl-1*H*-pyrazole-4,5-dione (47.1 mg, 0.25 mmol), 2-( $\alpha$ -naphthyl)acetic anhydride (132.9 mg, 0.375 mmol) and (2*R*,3*S*)-HyperBTM (3.9 mg, 0.125 mmol) were dissolved in ethyl acetate (6 ml, 0.04 M) at 0 °C. Diisopropylethylamine (54  $\mu$ l, 0.31 mmol) was added and the reaction mixture was stirred at 0 °C for 3 h. Morpholine (66  $\mu$ l, 0.75 mmol) was added and the reaction mixture was stirred for 16 h at rt. The reaction mixture was diluted with ethyl acetate and washed sequentially with 1 M aq. HCl ( $\times$ 2), sat. aq. NaHCO<sub>3</sub> ( $\times$ 2), and brine ( $\times$ 1). The organic layer was dried over MgSO<sub>4</sub>, filtered, and concentrated *in vacuo*. Purification by column chromatography (*n*-hexane : ethyl acetate 4:1 to 1:1) gave the title compound as a mixture of diastereomers as white amorphous solid (99.7 mg, 0.22 mmol, 90%, >95:5 d.r.).  $[\alpha]_D^{20} +336.4$  (c 0.50, CDCl<sub>3</sub>); **IR**  $\nu_{\max}$  (film) 3352 (O-H), 3059, 2922 (C-H), 2857 (C-H), 1717 (C=O, pyrazolone), 1639, 1620, 1595, 1501, 1360, 1113, 781; **HRMS** (ESI<sup>+</sup>) C<sub>26</sub>H<sub>25</sub>N<sub>3</sub>O<sub>4</sub> [M+H]<sup>+</sup> found 466.17231, requires 466.17373 (−3.0 ppm). *Data for major diastereomer: HPLC Analysis:* Chiralpak AD-H (95:5 hexane:isopropanol, flow rate 2.0 ml·min<sup>−1</sup>, 211 nm, 30 °C) *t<sub>R</sub>* (1'*R*,4*R*)-**14**: 31.9 min, *t<sub>R</sub>* (1'*S*,4*S*)-**14**: 42.4 min, >99:1 er; **<sup>1</sup>H NMR** (500 MHz, CDCl<sub>3</sub>)  $\delta$ <sub>H</sub>: 1.49 (3H, s, CH<sub>3</sub>), 2.76 (1H, ddd, <sup>2</sup>*J*<sub>HH</sub> = 10.5 Hz, <sup>3</sup>*J*<sub>HH</sub> = 7.2 Hz, 3.0 Hz, NCH<sub>2</sub>CH<sub>A</sub>H<sub>B</sub>), 2.96 (1H, ddd, <sup>2</sup>*J*<sub>HH</sub> = 13.5 Hz, <sup>3</sup>*J*<sub>HH</sub> = 6.0 Hz, 3.0 Hz, NCH<sub>A</sub>H<sub>B</sub>CH<sub>2</sub>), 3.21-3.33 (2H, m, NCH<sub>A</sub>H<sub>B</sub>CH<sub>2</sub>, NCH<sub>2</sub>CH<sub>A</sub>H<sub>B</sub>), 3.49 (1H, ddd, <sup>2</sup>*J*<sub>HH</sub> = 11.6 Hz, <sup>3</sup>*J*<sub>HH</sub> = 7.4 Hz, 3.0 Hz, NCH<sub>2</sub>CH<sub>C</sub>H<sub>D</sub>), 3.59 (1H, ddd, <sup>2</sup>*J*<sub>HH</sub> = 13.3 Hz, <sup>3</sup>*J*<sub>HH</sub> = 7.4 Hz, 3.0 Hz, NCH<sub>C</sub>H<sub>D</sub>CH<sub>2</sub>), 3.65-3.69 (1H, m, NCH<sub>2</sub>CH<sub>C</sub>H<sub>D</sub>), 3.81 (1H, ddd, <sup>2</sup>*J*<sub>HH</sub> = 13.3 Hz, <sup>3</sup>*J*<sub>HH</sub> = 5.8 Hz, 3.0 Hz, NCH<sub>C</sub>H<sub>D</sub>CH<sub>2</sub>), 4.91 (1H, s, CHAr), 7.13-7.17 (1H, m, NArC<sup>4</sup>H), 7.31-7.36 (2H, m, NArC<sup>3,5</sup>H), 7.48-7.55 (2H, m, CHArC<sup>3,7</sup>H), 7.55-7.59 (1H, m, CHArC<sup>6</sup>H) 7.66-7.72 (2H, m, NArC<sup>2,6</sup>H), 7.83 (1H, d, <sup>3</sup>*J*<sub>HH</sub> = 7.1 Hz, CHArC<sup>2</sup>H), 7.85-7.91 (2H, m, CHArC<sup>4,8</sup>H), 7.95 (1H, d, <sup>3</sup>*J*<sub>HH</sub> = 8.6 Hz, CHAr<sup>5</sup>H); **<sup>13</sup>C{<sup>1</sup>H} NMR** (126 MHz, CDCl<sub>3</sub>)  $\delta$ <sub>C</sub>: 14.9 (CH<sub>3</sub>), 42.8 (NCH<sub>C</sub>H<sub>D</sub>CH<sub>2</sub>), 44.5 (CHAr), 46.3 (NCH<sub>A</sub>H<sub>B</sub>CH<sub>2</sub>), 65.9 (NCH<sub>2</sub>CH<sub>A</sub>H<sub>B</sub>), 66.6 (NCH<sub>2</sub>CH<sub>C</sub>H<sub>D</sub>), 81.3 (C-OH), 119.0 (NArC<sup>2,6</sup>H), 121.3 (CHArC<sup>5</sup>H), 125.3 (NArC<sup>4</sup>H), 125.6 (CHArC<sup>3</sup>H), 126.3 (CHArC<sup>7</sup>H), 127.7 (CHArC<sup>1</sup>), 127.9 (CHArC<sup>6</sup>H), 128.0 (CHArC<sup>2</sup>H), 128.9 (NArC<sup>3,5</sup>H), 129.8 (CHArC<sup>4</sup>H), 129.9 (CHArC<sup>6</sup>H), 130.9 (CHArC<sup>8a</sup>), 134.0 (CHArC<sup>4a</sup>), 137.7 (NArC<sup>1</sup>), 160.6 (C=N), 171.0

(CON(CH<sub>2</sub>CH<sub>2</sub>)<sub>2</sub>O), 172.7 (CONAr); Data for minor diastereomer: <sup>1</sup>H NMR (500 MHz, CDCl<sub>3</sub>) (selected) δ<sub>H</sub>: 2.17 (3H, s, CH<sub>3</sub>), 2.67 (1H, ddd, <sup>2</sup>J<sub>HH</sub> = 10.6 Hz, <sup>3</sup>J<sub>HH</sub> = 7.3 Hz, 2.8 Hz, NCH<sub>2</sub>CH<sub>A</sub>H<sub>B</sub>), 4.87 (1H, s, CHAr).

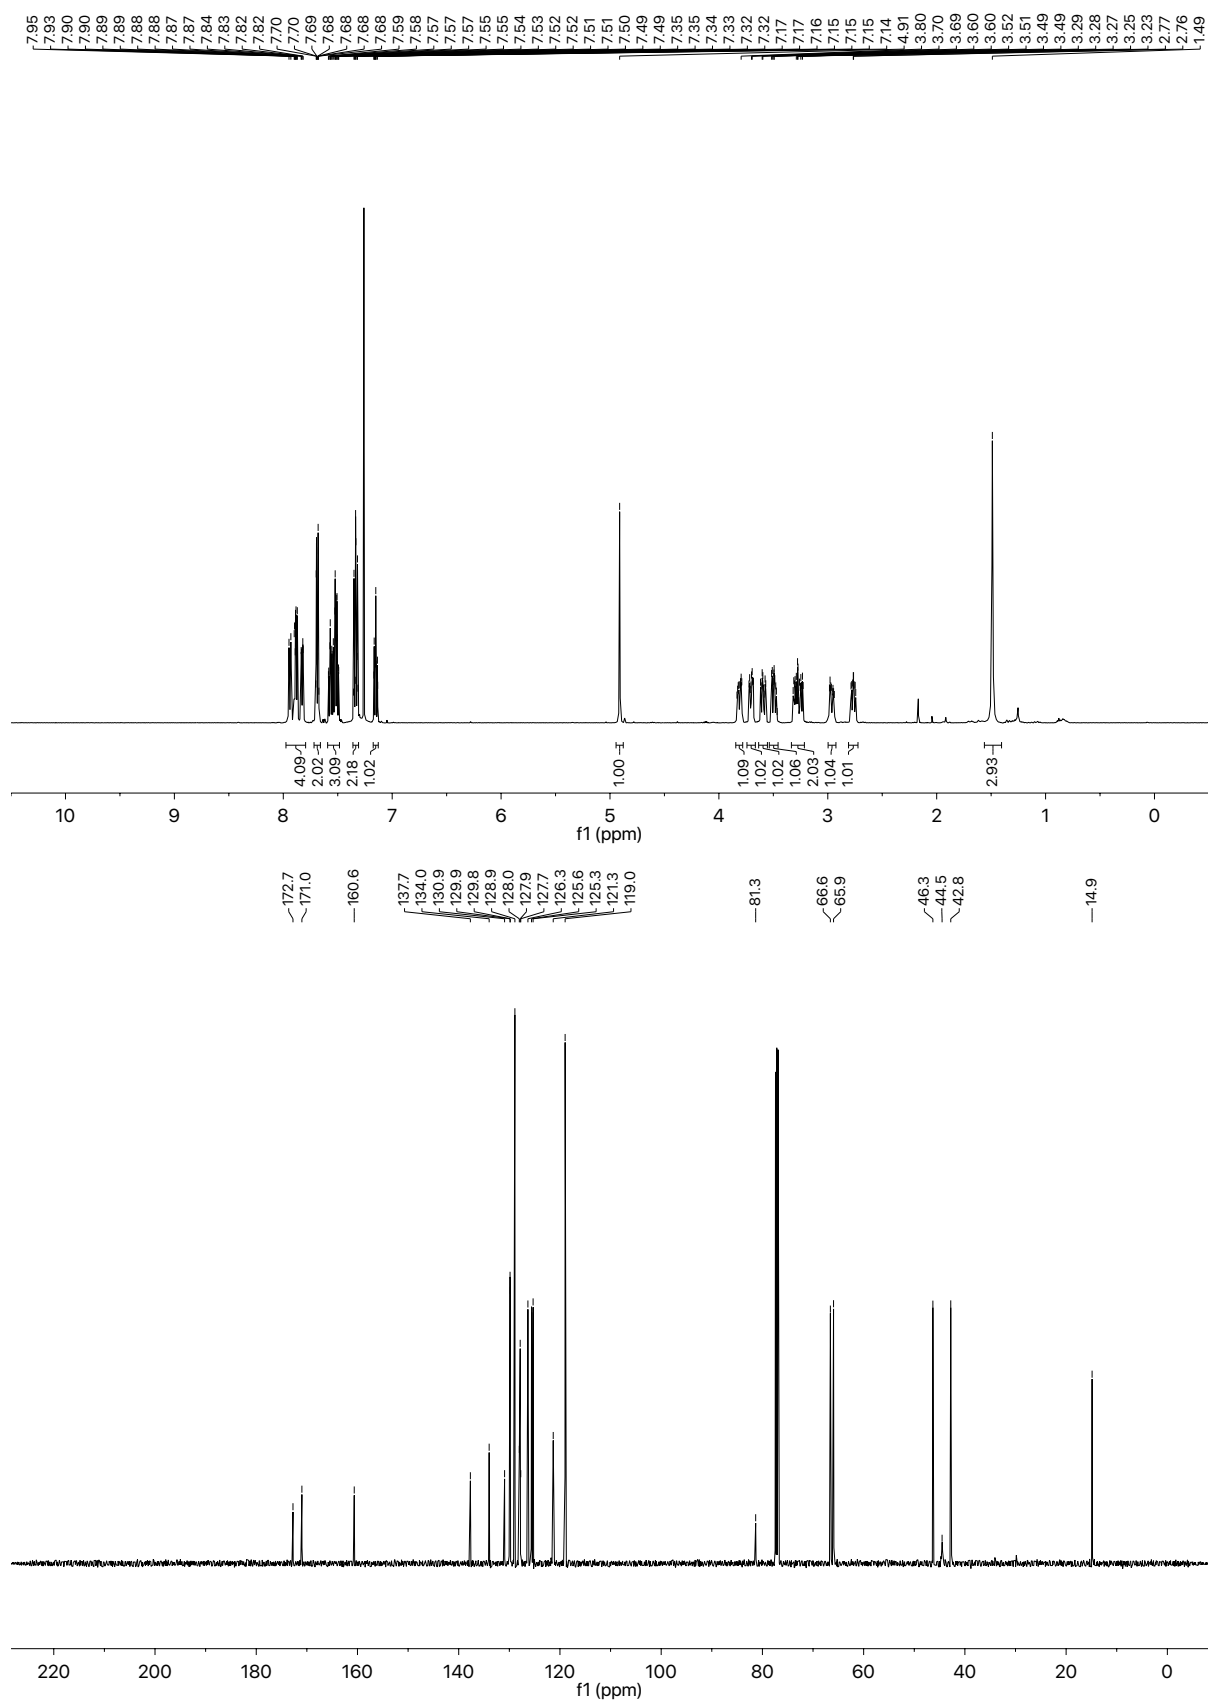

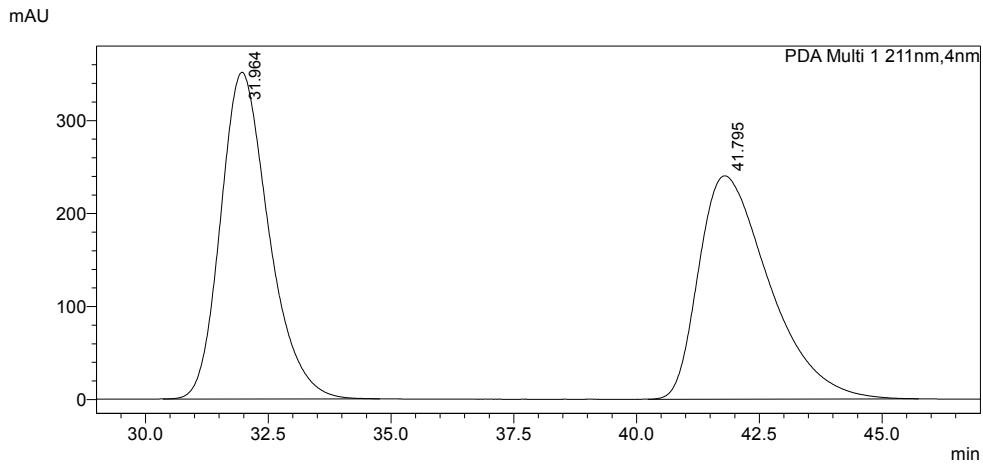

**<Peak Table>**

PDA Ch1 211nm

| Peak# | Ret. Time | Area%   |
|-------|-----------|---------|
| 1     | 31.964    | 50.040  |
| 2     | 41.795    | 49.960  |
| Total |           | 100.000 |

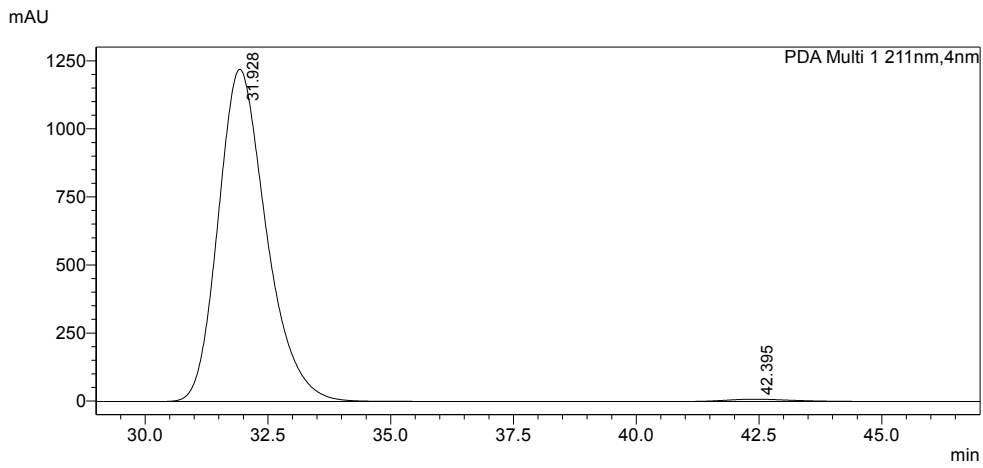

**<Peak Table>**

PDA Ch1 211nm

| Peak# | Ret. Time | Area%   |
|-------|-----------|---------|
| 1     | 31.928    | 99.084  |
| 2     | 42.395    | 0.916   |
| Total |           | 100.000 |

5.6. (1'*R*,4*R*)- and (1'*S*,4*R*)-4-(1-(*p*-chlorophenyl)2-morpholino-2-oxoethyl)-4-hydroxy-5-methyl-2-phenyl-2,4-dihydro-3H-pyrazol-3-one **21**

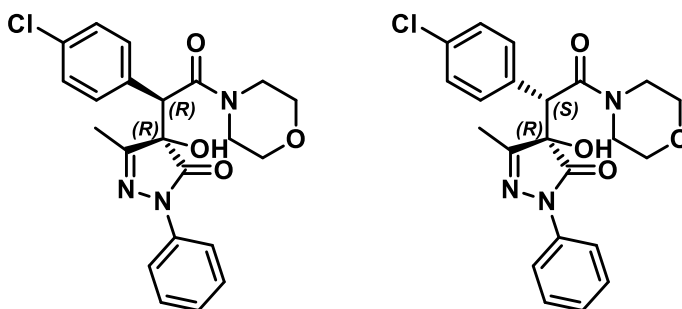

To a solution of 3-methyl-1-phenyl-1*H*-pyrazole-4,5-dione (47.1 mg, 0.25 mmol), 2-(*p*-chlorophenyl)acetic anhydride (121.2 mg, 0.375 mmol) and (2*R*,3*S*)-HyperBTM (3.9 mg, 0.125 mmol) were dissolved in ethyl acetate (6 ml, 0.04 M) at 0 °C. Diisopropylethylamine (54 µl, 0.31 mmol) was added and the reaction mixture was stirred at 0 °C for 3 h. Morpholine (66 µl, 0.75 mmol) was added and the reaction mixture was stirred for 16 h at rt. The reaction mixture was diluted with ethyl acetate and washed sequentially with 1 M aq. HCl (×2), sat. aq. NaHCO<sub>3</sub> (×2), and brine (×1). The organic layer was dried over MgSO<sub>4</sub>, filtered, and concentrated *in vacuo*. Purification by column chromatography (*n*-hexane : ethyl acetate 3:1 to 1:1) gave the title compound as a mixture of diastereomer as a white solid (56.0 mg, 0.13 mmol, 52%, >95:5 d.r.). **mp** 215-218 °C (*dec*); [α]<sub>D</sub><sup>20</sup> +188.5 (c 1.00, CDCl<sub>3</sub>); **IR** ν<sub>max</sub> (film) 3296 (O-H), 2920 (C-H), 2855 (C-H), 2361, 2342, 2330, 1717 (C=O, pyrazolone), 1622, 1595, 1489, 1111, 760; **HRMS** (ESI<sup>+</sup>) C<sub>22</sub>H<sub>21</sub>ClN<sub>3</sub>O<sub>4</sub>Na [M+Na]<sup>+</sup> found 450.11791, requires 450.11910 (−2.6 ppm). *Data for major diastereomer: HPLC Analysis:* Chiralpak AD-H (95:5 hexane:isopropanol, flow rate 2.00 ml·min<sup>−1</sup>, 211 nm, 30 °C) t<sub>R</sub> (1'*R*,4*R*)-**21**: 22.3 min, t<sub>R</sub> (1'*S*,4*S*)-**21**: 35.1 min, 98.5:1.5 er; **<sup>1</sup>H NMR** (500 MHz, CDCl<sub>3</sub>) δ<sub>H</sub>: 1.95 (3H, s, CH<sub>3</sub>), 3.06-3.25 (2H, m, NCH<sub>A</sub>H<sub>B</sub>CH<sub>2</sub>, NCH<sub>2</sub>CH<sub>A</sub>H<sub>B</sub>), 3.34 (1H, ddd, <sup>2</sup>J<sub>HH</sub> = 13.3 Hz, <sup>3</sup>J<sub>HH</sub> = 6.7 Hz, 3.0 Hz, NCH<sub>A</sub>H<sub>B</sub>CH<sub>2</sub>), 3.53 (1H, ddd, <sup>2</sup>J<sub>HH</sub> = 11.3 Hz, <sup>3</sup>J<sub>HH</sub> = 6.3 Hz, 3.0 Hz, NCH<sub>2</sub>CH<sub>A</sub>H<sub>B</sub>), 3.56-3.62 (1H, m, NCH<sub>2</sub>CH<sub>C</sub>H<sub>D</sub>), 3.65-3.77 (3H, m, NCH<sub>C</sub>H<sub>D</sub>CH<sub>2</sub>, NCH<sub>2</sub>CH<sub>C</sub>H<sub>D</sub>), 4.18 (1H, s, CHAr) 6.23 (1H, br s, OH), 7.19 (1H, app t, <sup>3</sup>J<sub>HH</sub> = 7.4 Hz, NArC<sup>4</sup>H), 7.23 (2H, app d, <sup>3</sup>J<sub>HH</sub> = 8.4 Hz, CHArC<sup>2,6</sup>H), 7.30 (2H, app d, <sup>3</sup>J<sub>HH</sub> = 8.4 Hz, CHArC<sup>3,5</sup>H), 7.35-7.41 (2H, m, NArC<sup>3,5</sup>H), 7.73 (2H, d, <sup>3</sup>J<sub>HH</sub> = 7.6 Hz, NArC<sup>2,6</sup>H); **<sup>13</sup>C{<sup>1</sup>H} NMR** (126 MHz, CDCl<sub>3</sub>) δ<sub>C</sub>: 15.7 (CH<sub>3</sub>), 42.6 (NCH<sub>C</sub>H<sub>D</sub>CH<sub>2</sub>), 46.6 (NCH<sub>A</sub>H<sub>B</sub>CH<sub>2</sub>), 51.5 (CHAr), 66.1 (NCH<sub>2</sub>CH<sub>A</sub>H<sub>B</sub>), 66.7 (NCH<sub>2</sub>CH<sub>C</sub>H<sub>D</sub>), 81.5 (C-OH), 119.0 (NArC<sup>2,6</sup>H), 125.6 (NArC<sup>4</sup>H), 129.0 (NArC<sup>3,5</sup>H), 129.6 (CHArC<sup>3,5</sup>H), 130.1 (CHArC<sup>2,6</sup>H), 130.6 (CHArC<sup>1</sup>), 135.2 (CHArC<sup>4</sup>Cl), 137.4 (NArC<sup>1</sup>), 160.4 (C=N), 169.8 (CON(CH<sub>2</sub>CH<sub>2</sub>)<sub>2</sub>O), 171.6 (CONAr); *Data for minor diastereomer: HPLC Analysis:* Chiralpak AD-H (95:5 hexane:isopropanol, flow rate 2.00 ml·min<sup>−1</sup>, 211 nm, 30 °C) t<sub>R</sub> (1'*S*,4*R*)-**21**: 27.9 min, t<sub>R</sub> (1'*R*,4*S*)-**21**: 76.3 min (not detected); **<sup>1</sup>H NMR** (500 MHz, CDCl<sub>3</sub>) (*selected*) δ<sub>H</sub>:

2.02 (3H, s, CH<sub>3</sub>), 4.07 (1H, s, CHAr), 5.34 (1H, br s, OH); <sup>13</sup>C{<sup>1</sup>H} NMR (126 MHz, CDCl<sub>3</sub>)

(selected) δ<sub>C</sub>: 15.0 (CH<sub>3</sub>), 118.9 (NArC<sup>2,6</sup>H), 125.3 (NArC<sup>4</sup>H), 129.2 (ArCH), 131.1 (ArCH).

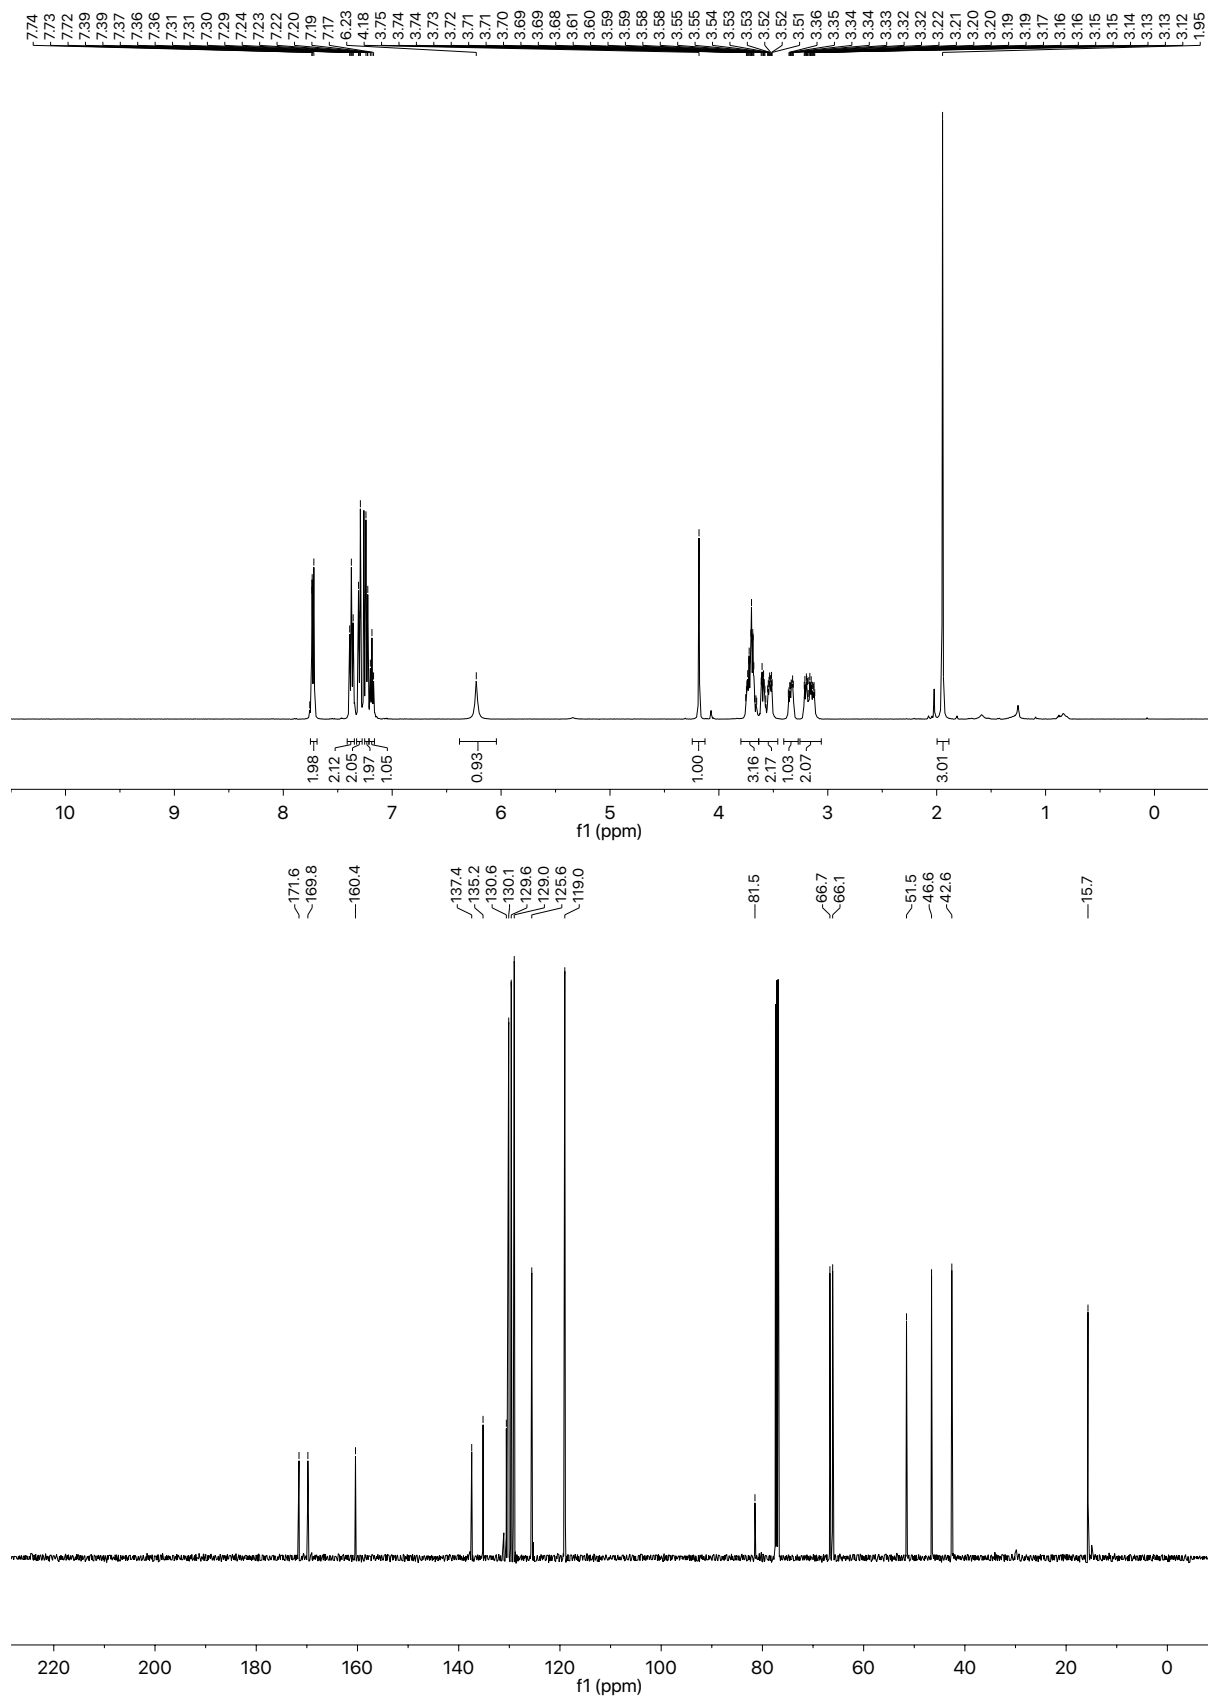



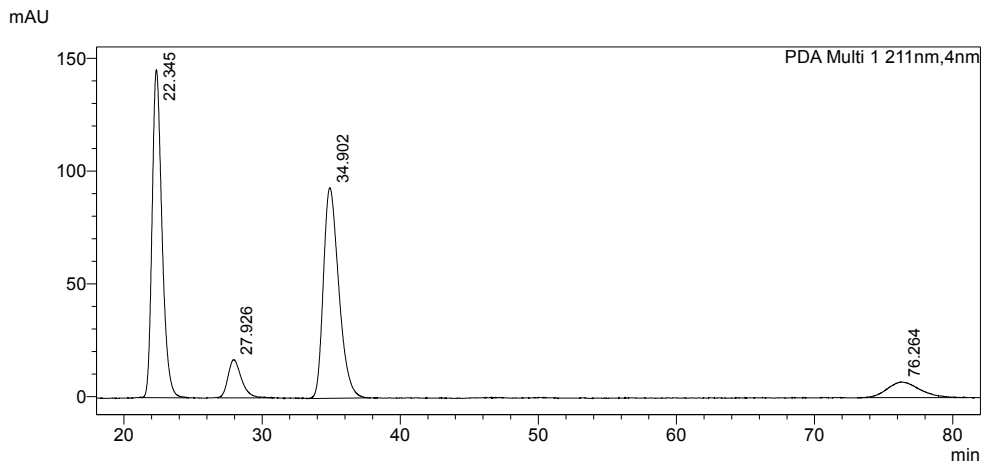

<Peak Table>

| Peak# | Ret. Time | Area%   |
|-------|-----------|---------|
| 1     | 22.345    | 43.118  |
| 2     | 27.926    | 6.825   |
| 3     | 34.902    | 43.312  |
| 4     | 76.264    | 6.746   |
| Total |           | 100.000 |

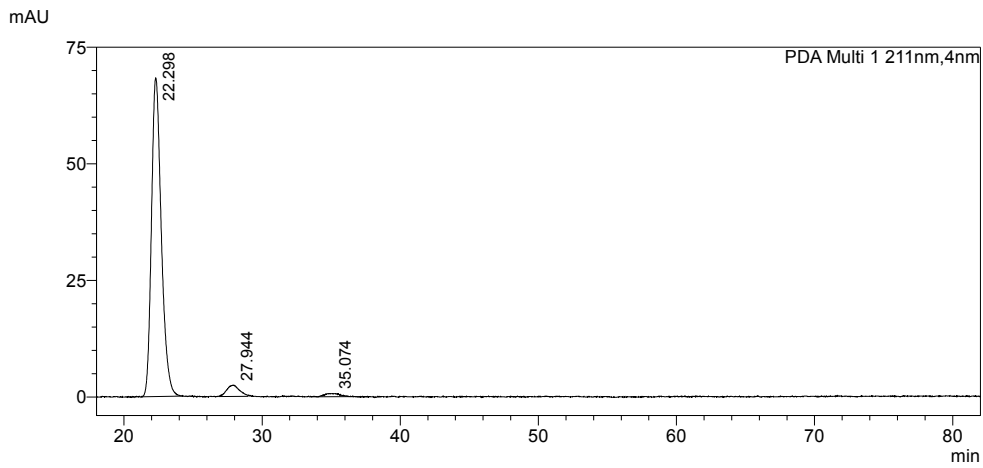

<Peak Table>

| Peak# | Ret. Time | Area%   |
|-------|-----------|---------|
| 1     | 22.298    | 94.076  |
| 2     | 27.944    | 4.398   |
| 3     | 35.074    | 1.526   |
| Total |           | 100.000 |

5.7. (1'*R*,4*R*)- and (1'*S*,4*R*)-4-(1-(4-bromophenyl)-2-morpholino-2-oxoethyl)-4-hydroxy-5-methyl-2-phenyl-2,4-dihydro-3*H*-pyrazole-3-one **22**

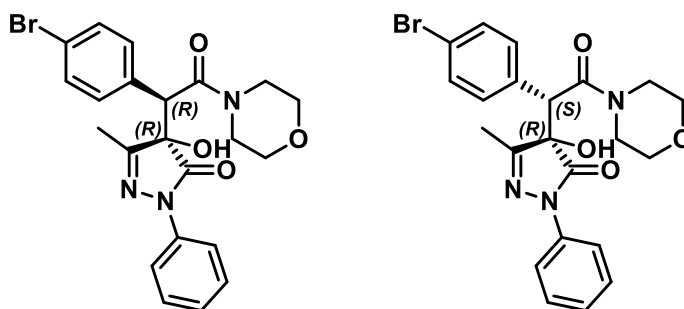

To a solution of 3-methyl-1-phenyl-1*H*-pyrazole-4,5-dione (47.1 mg, 0.25 mmol), 2-(*p*-bromophenyl)acetic anhydride (154.5 mg, 0.375 mmol) and (2*R*,3*S*)-HyperBTM (3.9 mg, 0.125 mmol) were dissolved in ethyl acetate (6 ml, 0.04 M) at 0 °C. Diisopropylethylamine (54  $\mu$ l, 0.31 mmol) was added and the reaction mixture was stirred at 0 °C for 3 h. Morpholine (66  $\mu$ l, 0.75 mmol) was added and the reaction mixture was stirred for 16 h at rt. The reaction mixture was diluted with ethyl acetate and washed sequentially with 1 M aq. HCl ( $\times$ 2), sat. aq. NaHCO<sub>3</sub> ( $\times$ 2), and brine ( $\times$ 1). The organic layer was dried over MgSO<sub>4</sub>, filtered, and concentrated *in vacuo*. Purification by column chromatography (*n*-hexane : ethyl acetate 4:1 to 3:4) gave the title compound as a mixture of diastereomer as a white solid (47.4 mg, 0.10 mmol, 40%, >95:5 d.r.). **mp** 230-232 °C (*dec*); [ $\alpha$ ]<sub>D</sub><sup>20</sup> +215.3 (*c* 1.00, CDCl<sub>3</sub>); **IR**  $\nu_{\max}$  (film) 3335 (O-H), 2968 (C-H), 2922 (C-H), 2859 (C-H), 1717 (C=O, pyrazolone), 1643, 1626, 1489, 1115, 758; **HRMS** (ESI<sup>+</sup>) C<sub>22</sub>H<sub>22</sub>BrN<sub>3</sub>O<sub>4</sub>Na [M(<sup>79</sup>Br)+Na]<sup>+</sup> found 494.0683, requires 494.0686 (-0.5 ppm). **Data for major diastereomer: HPLC Analysis:** Chiralpak AD-H (95:5 hexane:isopropanol, flow rate 2.00 ml·min<sup>-1</sup>, 211 nm, 30 °C) *t*<sub>R</sub> (1'*R*,4*R*)-**22**: 23.6 min, *t*<sub>R</sub> (1'*S*,4*S*)-**22**: 36.1 min, 98:2 er; **<sup>1</sup>H NMR** (500 MHz, CDCl<sub>3</sub>)  $\delta$ <sub>H</sub>: 1.94 (3H, s, CH<sub>3</sub>), 3.14 (1H, ddd, <sup>2</sup>*J*<sub>HH</sub> = 13.3 Hz, <sup>3</sup>*J*<sub>HH</sub> = 6.4 Hz, 3.0 Hz, NCH<sub>A</sub>H<sub>B</sub>CH<sub>2</sub>), 3.20 (1H, ddd, <sup>2</sup>*J*<sub>HH</sub> = 11.4 Hz, <sup>3</sup>*J*<sub>HH</sub> = 6.7 Hz, 3.0 Hz, NCH<sub>2</sub>CH<sub>A</sub>H<sub>B</sub>), 3.34 (1H, ddd, <sup>2</sup>*J*<sub>HH</sub> = 13.3 Hz, <sup>3</sup>*J*<sub>HH</sub> = 6.7 Hz, 3.1 Hz, NCH<sub>A</sub>H<sub>B</sub>CH<sub>2</sub>), 3.53 (1H, ddd, <sup>2</sup>*J*<sub>HH</sub> = 11.4 Hz, <sup>3</sup>*J*<sub>HH</sub> = 6.4 Hz, 3.1 Hz, NCH<sub>2</sub>CH<sub>A</sub>H<sub>B</sub>), 3.57-3.63 (1H, m, NCH<sub>2</sub>CH<sub>C</sub>H<sub>D</sub>), 3.67-3.76 (3H, m, NCH<sub>C</sub>H<sub>D</sub>CH<sub>2</sub>, NCH<sub>2</sub>CH<sub>C</sub>H<sub>D</sub>), 4.17 (1H, s, CHAr), 6.22 (1H, br s, OH), 7.14-7.21 (3H, m, CHAr<sup>2,4,6</sup>H), 7.38 (2H, app t, <sup>3</sup>*J*<sub>HH</sub> = 7.9 Hz, NArC<sup>3,5</sup>H), 7.45 (2H, d, <sup>3</sup>*J*<sub>HH</sub> = 8.4 Hz, CHArC<sup>3,5</sup>H), 7.73 (2H, app d, <sup>3</sup>*J*<sub>HH</sub> = 8.1 Hz, NArC<sup>2,6</sup>H); **<sup>13</sup>C{<sup>1</sup>H} NMR** (126 MHz, CDCl<sub>3</sub>)  $\delta$ <sub>C</sub>: 15.7 (CH<sub>3</sub>), 42.6 (NCH<sub>C</sub>H<sub>D</sub>CH<sub>2</sub>), 46.6 (NCH<sub>A</sub>H<sub>B</sub>CH<sub>2</sub>), 51.6 (CHAr), 66.1 (NCH<sub>2</sub>CH<sub>A</sub>H<sub>B</sub>), 66.7 (NCH<sub>2</sub>CH<sub>C</sub>H<sub>D</sub>), 81.4 (C-OH), 119.1 (NArC<sup>2,6</sup>H), 123.3 (CHArC<sup>4</sup>Br), 125.6 (NArC<sup>4</sup>H), 129.0 (NArC<sup>3,5</sup>H), 130.4 (CHArC<sup>2,6</sup>H), 131.1 (CHArC<sup>1</sup>), 132.6 (CHArC<sup>3,5</sup>H), 137.4 (NArC<sup>1</sup>), 160.4 (C=N), 169.7 (CON(CH<sub>2</sub>CH<sub>2</sub>)<sub>2</sub>O), 171.5 (CONAr); **Data for minor diastereomer: HPLC Analysis:** Chiralpak AD-H (95:5 hexane:isopropanol, flow rate 2.0 ml·min<sup>-1</sup>, 211 nm, 30 °C) *t*<sub>R</sub> (1'*S*,4*R*)-**22**: 28.6 min, *t*<sub>R</sub> (1'*R*,4*S*)-

**22:** 77.6 min (not detected); <sup>1</sup>H NMR (500 MHz, CDCl<sub>3</sub>) (*selected*) δ<sub>H</sub>: 2.02 (3H, s, CH<sub>3</sub>), 4.06 (1H, s, CHAr), 5.31 (1H, br s, OH).

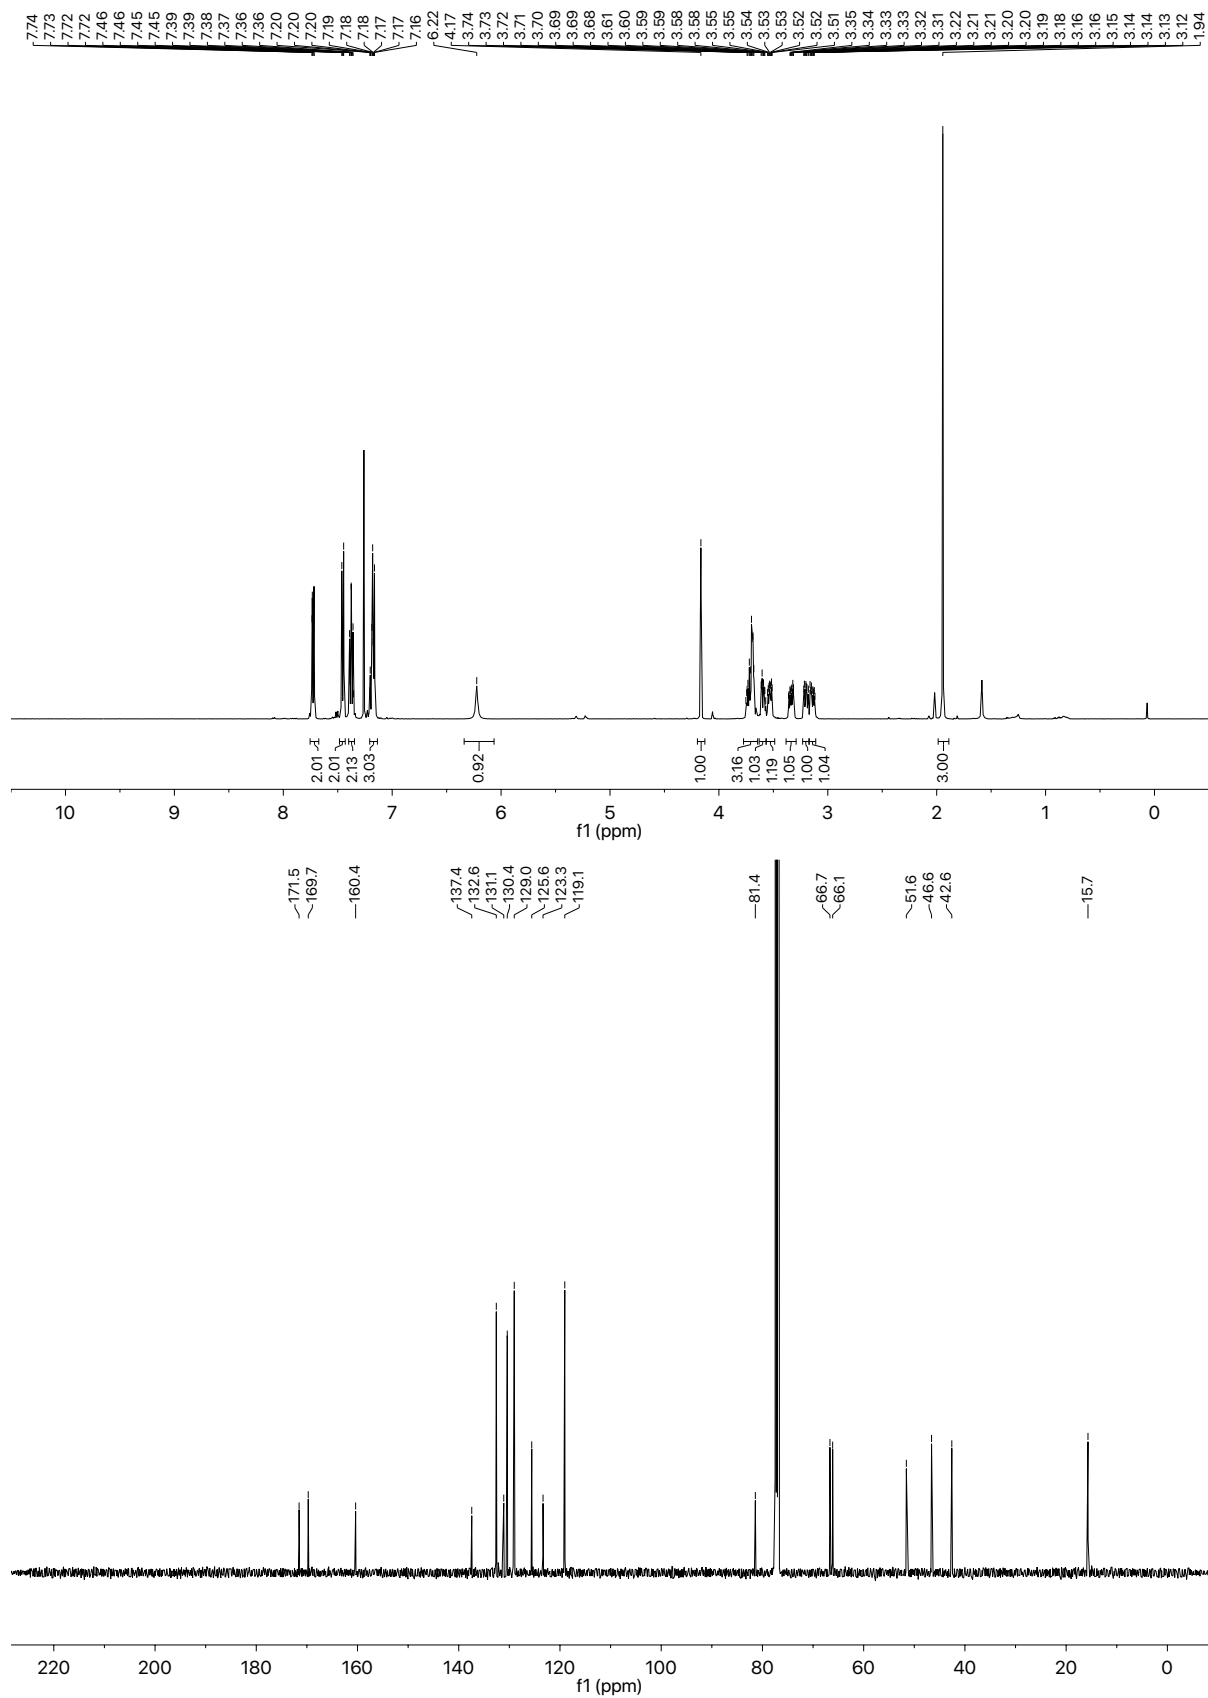

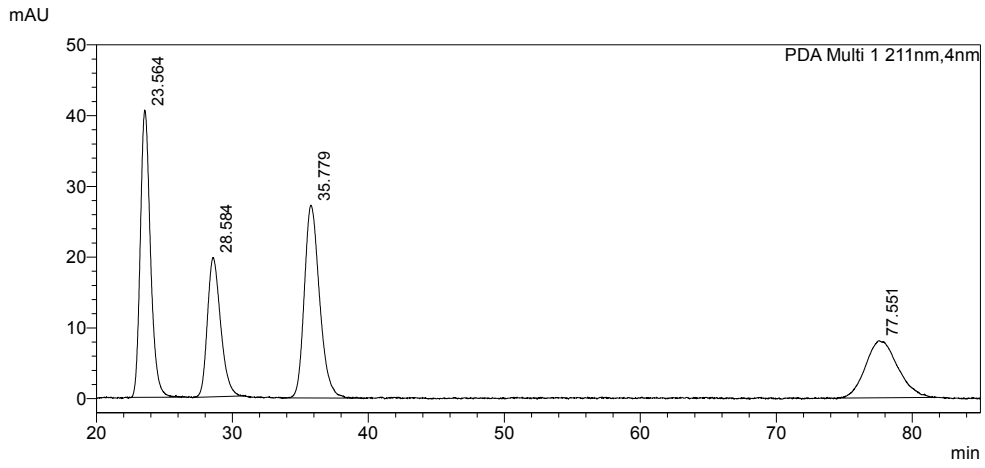

<Peak Table>

| PDA Ch1 211nm |           |         |
|---------------|-----------|---------|
| Peak#         | Ret. Time | Area%   |
| 1             | 23.564    | 30.578  |
| 2             | 28.584    | 19.299  |
| 3             | 35.779    | 30.803  |
| 4             | 77.551    | 19.320  |
| Total         |           | 100.000 |

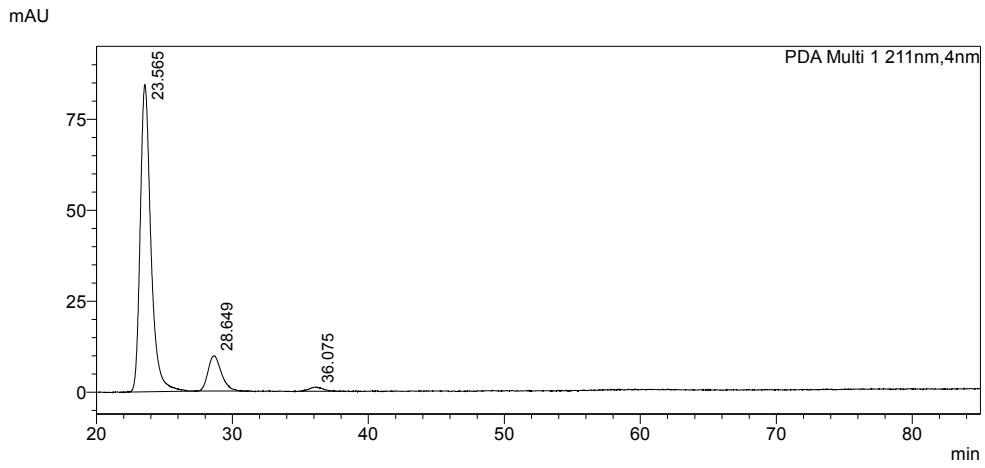

<Peak Table>

| PDA Ch1 211nm |           |         |
|---------------|-----------|---------|
| Peak#         | Ret. Time | Area%   |
| 1             | 23.565    | 86.104  |
| 2             | 28.649    | 12.345  |
| 3             | 36.075    | 1.551   |
| Total         |           | 100.000 |

5.8. (1'*R*,4*R*)- and (1'*S*,4*R*)-4-hydroxy-5-methyl-4-(2-morpholine-2-oxo-1-(*p*-tolyl)ethyl)-2-phenyl-2,4-dihydro-3*H*-pyrazol-3-one **23**

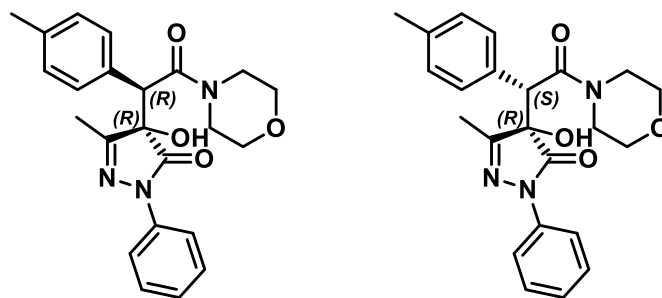

To a solution of 3-methyl-1-phenyl-1*H*-pyrazole-4,5-dione (47.1 mg, 0.25 mmol), 2-(*p*-tolyl)acetic anhydride (105.9 mg, 0.375 mmol) and (2*R*,3*S*)-HyperBTM (3.9 mg, 0.125 mmol) were dissolved in ethyl acetate (6 ml, 0.04 M) at 0 °C. Diisopropylethylamine (54 µl, 0.31 mmol) was added and the reaction mixture was stirred at 0 °C for 3 h. Morpholine (66 µl, 0.75 mmol) was added and the reaction mixture was stirred for 16 h at rt. The reaction mixture was diluted with ethyl acetate and washed sequentially with 1 M aq. HCl (×2), sat. aq. NaHCO<sub>3</sub> (×2), and brine (×1). The organic layer was dried over MgSO<sub>4</sub>, filtered, and concentrated *in vacuo*. Purification by column chromatography (*n*-hexane : ethyl acetate 4:1 to 1:1) gave the title compound as a mixture of diastereomers as white solid (61.7 mg, 0.15 mmol, 61%, 91:9 d.r.). **mp** 197-199 °C (*dec*); [ $\alpha$ ]<sub>D</sub><sup>20</sup> +253.9 (*c* 1.00, CDCl<sub>3</sub>); **IR**  $\nu_{\max}$  (film) 3368 (O-H), 2965 (C-H), 2922 (C-H), 2857 (C-H), 1719 (C=O, pyrazolone), 1622, 1597, 1501, 1115, 758; **HRMS** (ESI<sup>+</sup>) C<sub>23</sub>H<sub>24</sub>N<sub>3</sub>O<sub>4</sub>Na [M+Na]<sup>+</sup> found 450.11791, requires 450.11910 (-2.6 ppm). *Data for major diastereomer: HPLC Analysis:* Chiralpak AD-H (80:20 hexane:isopropanol, flow rate 1.0 ml·min<sup>-1</sup>, 211 nm, 30 °C) *t*<sub>R</sub> (1'*R*,4*R*)-**23**: 10.7 min, *t*<sub>R</sub> (1'*S*,4*S*)-**23**: 13.3 min, >99:1 er; **<sup>1</sup>H NMR** (500 MHz, CDCl<sub>3</sub>)  $\delta_{\text{H}}$ : 1.96 (3H, s, C<sup>5</sup>CH<sub>3</sub>), 2.30 (3H, s, ArC<sup>4</sup>CH<sub>3</sub>), 3.09-3.19 (2H, m, NCH<sub>A</sub>H<sub>B</sub>CH<sub>2</sub>, NCH<sub>2</sub>CH<sub>A</sub>H<sub>B</sub>), 3.32 (1H, ddd, <sup>2</sup>*J*<sub>HH</sub> = 14.0 Hz, <sup>3</sup>*J*<sub>HH</sub> = 7.3 Hz, 3.0 Hz, NCH<sub>A</sub>H<sub>B</sub>CH<sub>2</sub>), 3.48 (1H, ddd, <sup>2</sup>*J*<sub>HH</sub> = 11.4 Hz, <sup>3</sup>*J*<sub>HH</sub> = 6.3 Hz, 3.0 Hz, NCH<sub>2</sub>CH<sub>A</sub>H<sub>B</sub>), 3.54-3.67 (2H, m, NCH<sub>C</sub>H<sub>D</sub>CH<sub>2</sub>, NCH<sub>2</sub>CH<sub>C</sub>H<sub>D</sub>), 3.69-3.78 (2H, m, NCH<sub>C</sub>H<sub>D</sub>CH<sub>2</sub>, NCH<sub>2</sub>CH<sub>C</sub>H<sub>D</sub>), 4.19 (1H, s, CHAr), 6.33 (1H, br s, OH), 7.06-7.19 (5H, m, CHArC<sup>2,3,5,6</sup>H, NArC<sup>4</sup>H), 7.32-7.40 (2H, m, NArC<sup>3,5</sup>H), 7.72 (2H, d, <sup>3</sup>*J*<sub>HH</sub> = 7.4 Hz, NArC<sup>2,6</sup>H); **<sup>13</sup>C{<sup>1</sup>H} NMR** (126 MHz, CDCl<sub>3</sub>)  $\delta_{\text{C}}$ : 15.7 (C<sup>5</sup>CH<sub>3</sub>), 21.2 (ArC<sup>4</sup>CH<sub>3</sub>), 42.5 (NCH<sub>C</sub>H<sub>D</sub>CH<sub>2</sub>), 46.5 (NCH<sub>A</sub>H<sub>B</sub>CH<sub>2</sub>), 52.1 (CHAr), 66.1 (NCH<sub>2</sub>CH<sub>A</sub>H<sub>B</sub>), 66.6 (NCH<sub>2</sub>CH<sub>C</sub>H<sub>D</sub>), 81.7 (C-OH), 119.1 (NArC<sup>2,6</sup>H), 125.4 (NArC<sup>4</sup>H), 128.5 (CHArC<sup>2,6</sup>H), 128.8 (NArC<sup>1</sup>), 128.9 (NArC<sup>3,5</sup>H), 130.0 (CHArC<sup>3,5</sup>H), 137.5 (CHArC<sup>1</sup>), 138.9 (CHArC<sup>4</sup>CH<sub>3</sub>), 160.9 (C=N), 170.4 (CON(CH<sub>2</sub>CH<sub>2</sub>)<sub>2</sub>O), 171.8 (CONAr); *Data for minor diastereomer: HPLC Analysis:* Chiralpak AD-H (80:20 hexane:isopropanol, flow rate 1.0 ml·min<sup>-1</sup>, 211 nm, 30 °C) *t*<sub>R</sub> (1'*S*,4*R*)-**23**: 9.6 min, *t*<sub>R</sub> (1'*R*,4*S*)-**23**: 17.4 min, 99:1 er; **<sup>1</sup>H NMR** (500 MHz, CDCl<sub>3</sub>) (*selected*)  $\delta_{\text{H}}$ : 2.01 (3H, s, C<sup>5</sup>CH<sub>3</sub>), 2.32 (3H, s, ArC<sup>4</sup>CH<sub>3</sub>), 3.04 (1H, ddd, <sup>2</sup>*J*<sub>HH</sub> = 10.4 Hz, <sup>3</sup>*J*<sub>HH</sub> = 7.3 Hz, 2.5 Hz, NCH<sub>2</sub>CH<sub>A</sub>H<sub>B</sub>), 4.11 (1H, s, CHAr);

$^{13}\text{C}\{^1\text{H}\}$  NMR (126 MHz,  $\text{CDCl}_3$ ) (selected)  $\delta_{\text{C}}$ : 14.9 ( $\text{C}^5\text{CH}_3$ ), 42.3 ( $\text{NCH}_2\text{CH}_2$ ), 52.5 ( $\text{CHAr}$ ), 80.3 ( $\text{C-OH}$ ), 119.0 ( $\text{NArC}^{2,6}\text{H}$ ), 125.1 ( $\text{NArC}^4\text{H}$ ), 129.6 ( $\text{ArCH}$ ), 129.7 ( $\text{ArCH}$ ), 137.8 ( $\text{CHArC}^1$ ), 138.6 ( $\text{CHArC}^4\text{CH}_3$ ), 160.5 ( $\text{C=N}$ ), 169.4 ( $\text{CON}(\text{CH}_2\text{CH}_2)_2\text{O}$ ), 171.1 ( $\text{CONAr}$ ).

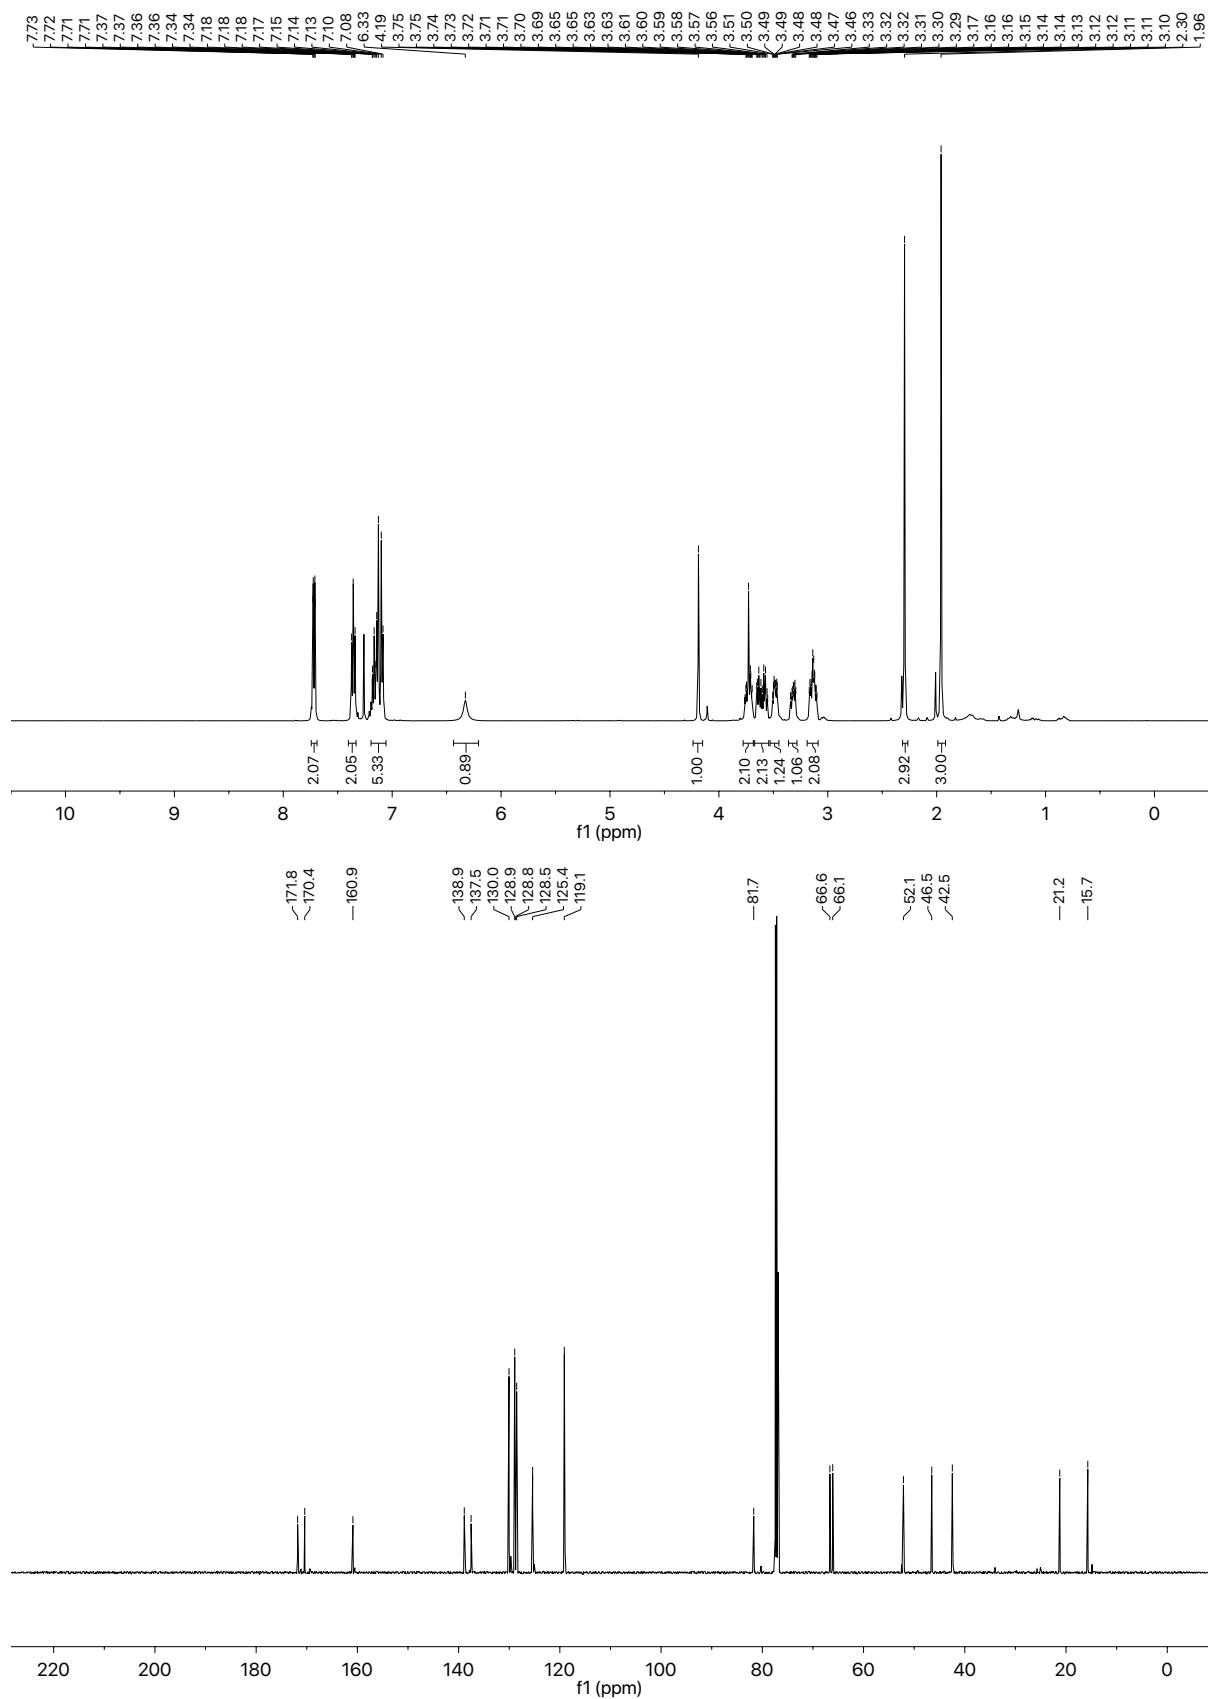

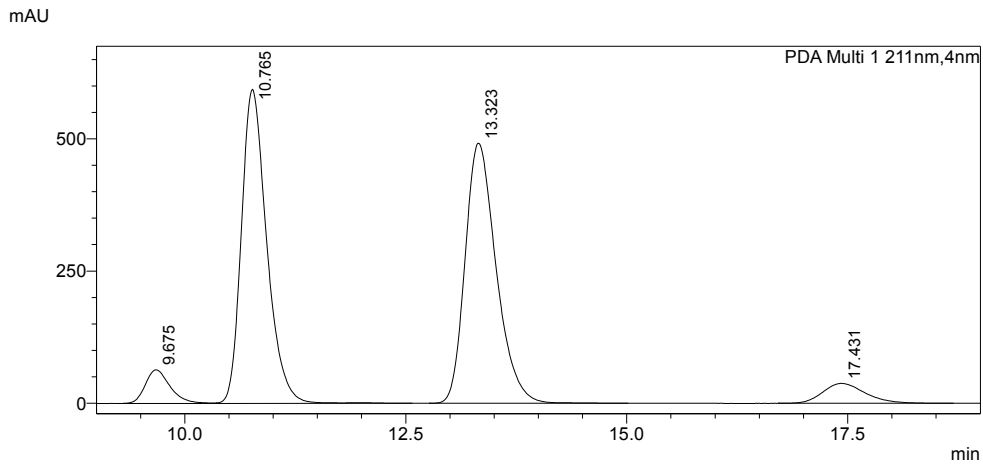

**<Peak Table>**

| PDA Ch1 211nm |           |         |
|---------------|-----------|---------|
| Peak#         | Ret. Time | Area%   |
| 1             | 9.675     | 4.696   |
| 2             | 10.765    | 44.883  |
| 3             | 13.323    | 45.642  |
| 4             | 17.431    | 4.778   |
| Total         |           | 100.000 |

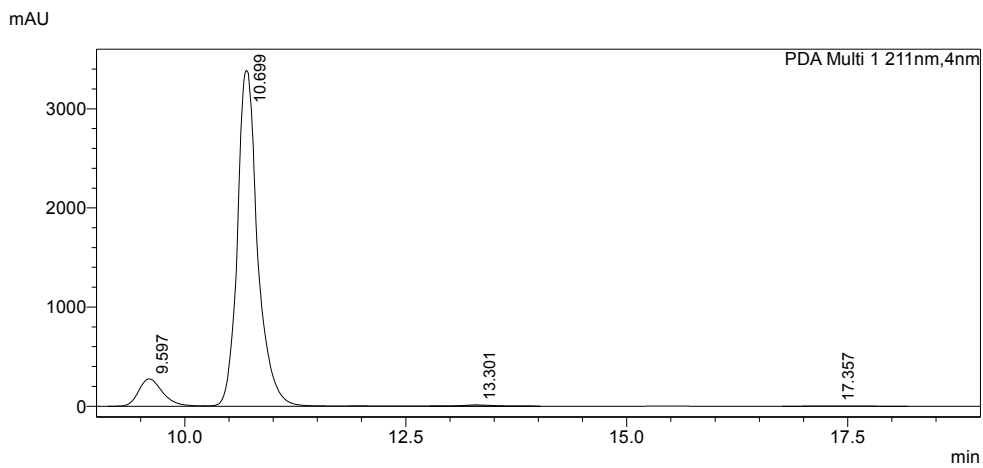

**<Peak Table>**

| PDA Ch1 211nm |           |         |
|---------------|-----------|---------|
| Peak#         | Ret. Time | Area%   |
| 1             | 9.597     | 8.744   |
| 2             | 10.699    | 90.677  |
| 3             | 13.301    | 0.477   |
| 4             | 17.357    | 0.102   |
| Total         |           | 100.000 |

5.9. (1'*R*,4*R*)-4-(1-(*p*-anisyl)-2-morpholine-2-oxoethyl)-4-hydroxy-5-methyl-2-phenyl-2,4-dihydro-3*H*-pyrazol-3-one **24**

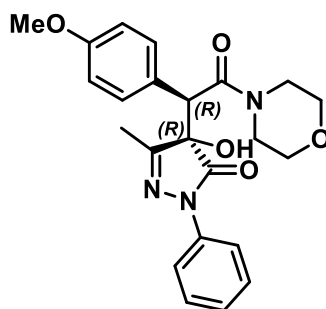

To a solution of 3-methyl-1-phenyl-1*H*-pyrazole-4,5-dione (47.1 mg, 0.25 mmol), 2-(*p*-anisyl)acetic anhydride (117.9 mg, 0.375 mmol) and (2*R*,3*S*)-HyperBTM (3.9 mg, 0.125 mmol) were dissolved in ethyl acetate (6 ml, 0.04 M) at 0 °C. Diisopropylethylamine (54  $\mu$ l, 0.31 mmol) was added and the reaction mixture was stirred at 0 °C for 3 h. Morpholine (66  $\mu$ l, 0.75 mmol) was added and the reaction mixture was stirred for 16 h at rt. The reaction mixture was diluted with ethyl acetate and washed sequentially with 1 M aq. HCl ( $\times$ 2), sat. aq. NaHCO<sub>3</sub> ( $\times$ 2), and brine ( $\times$ 1). The organic layer was dried over MgSO<sub>4</sub>, filtered, and concentrated *in vacuo*. Purification by column chromatography (*n*-hexane : ethyl acetate 4:1 to 1:1) gave the title compound as a white solid (60.7 mg, 0.14 mmol, 57%). **mp** 193-195 °C (*dec*);  $[\alpha]_D^{20}$  +147.0 (*c* 0.50, CDCl<sub>3</sub>); **HPLC Analysis**: Chiralpak AD-H (85:15 hexane:isopropanol, flow rate 2.0 ml·min<sup>-1</sup>, 211 nm, 30 °C)  $t_R$  (1'*R*,4*R*)-**24**: 9.8 min,  $t_R$  (1'*S*,4*S*)-**24**: 13.5 min, >99:1 *er*; **IR**  $\nu_{max}$  (film) 3372 (O-H), 2963 (C-H), 2924 (C-H), 2855 (C-H), 2363, 1717 (C=O, pyrazolone), 1612, 1512, 1501, 1252, 1115, 758; **<sup>1</sup>H NMR** (500 MHz, CDCl<sub>3</sub>)  $\delta_H$ : 1.96 (3H, s, CCH<sub>3</sub>), 3.10-3.21 (2H, m, NCH<sub>A</sub>H<sub>B</sub>CH<sub>2</sub>, NCH<sub>2</sub>CH<sub>A</sub>H<sub>B</sub>), 3.33 (1H, ddd, <sup>2</sup>*J*<sub>HH</sub> = 14.0 Hz, <sup>3</sup>*J*<sub>HH</sub> = 7.4 Hz, 3.0 Hz, NCH<sub>A</sub>H<sub>B</sub>CH<sub>2</sub>), 3.50 (1H, ddd, <sup>2</sup>*J*<sub>HH</sub> = 11.3 Hz, <sup>3</sup>*J*<sub>HH</sub> = 6.3 Hz, 3.0 Hz, NCH<sub>2</sub>CH<sub>A</sub>H<sub>B</sub>), 3.55-3.67 (2H, m, NCH<sub>C</sub>H<sub>D</sub>CH<sub>2</sub>, NCH<sub>2</sub>CH<sub>C</sub>H<sub>D</sub>), 3.69-3.80 (5H, m, NCH<sub>C</sub>H<sub>D</sub>CH<sub>2</sub>, NCH<sub>2</sub>CH<sub>C</sub>H<sub>D</sub>, OCH<sub>3</sub>), 4.17 (1H, s, CHAr), 6.30 (1H, br s, OH), 6.81 (2H, app d, <sup>3</sup>*J*<sub>HH</sub> = 8.7 Hz, CHArC<sup>3,5</sup>H), 7.13-7.22 (3H, m, NArC<sup>4</sup>H, CHArC<sup>2,6</sup>H), 7.36 (3H, app t, <sup>3</sup>*J*<sub>HH</sub> = 7.9 Hz, NArC<sup>3,5</sup>H), 7.73 (2H, app d, <sup>3</sup>*J*<sub>HH</sub> = 7.9 Hz, NArC<sup>2,6</sup>H); **<sup>13</sup>C{<sup>1</sup>H} NMR** (126 MHz, CDCl<sub>3</sub>)  $\delta_C$ : 15.7 (CCH<sub>3</sub>), 42.5 (NCH<sub>C</sub>H<sub>D</sub>CH<sub>2</sub>), 46.6 (NCH<sub>A</sub>H<sub>B</sub>CH<sub>2</sub>), 51.6 (CHAr), 55.4 (OCH<sub>3</sub>), 66.1 (NCH<sub>2</sub>CH<sub>A</sub>H<sub>B</sub>), 66.7 (NCH<sub>2</sub>CH<sub>C</sub>H<sub>D</sub>), 81.7 (C-OH), 114.7 (CHArC<sup>3,5</sup>H), 119.1 (NArC<sup>2,6</sup>H), 123.7 (CHArC<sup>1</sup>), 125.4 (NArC<sup>4</sup>H), 128.9 (NArC<sup>3,5</sup>H), 129.9 (CHArC<sup>2,6</sup>H), 137.6 (NArC<sup>1</sup>), 159.9 (CHArC<sup>4</sup>OCH<sub>3</sub>), 160.9 (C=N), 170.5 (CON(CH<sub>2</sub>CH<sub>2</sub>)<sub>2</sub>O), 171.8 (CONAr); **HRMS** (ESI<sup>+</sup>) C<sub>23</sub>H<sub>24</sub>N<sub>3</sub>O<sub>5</sub>Na [M+Na]<sup>+</sup> found 446.16763, requires 446.16864 (-2.3 ppm).



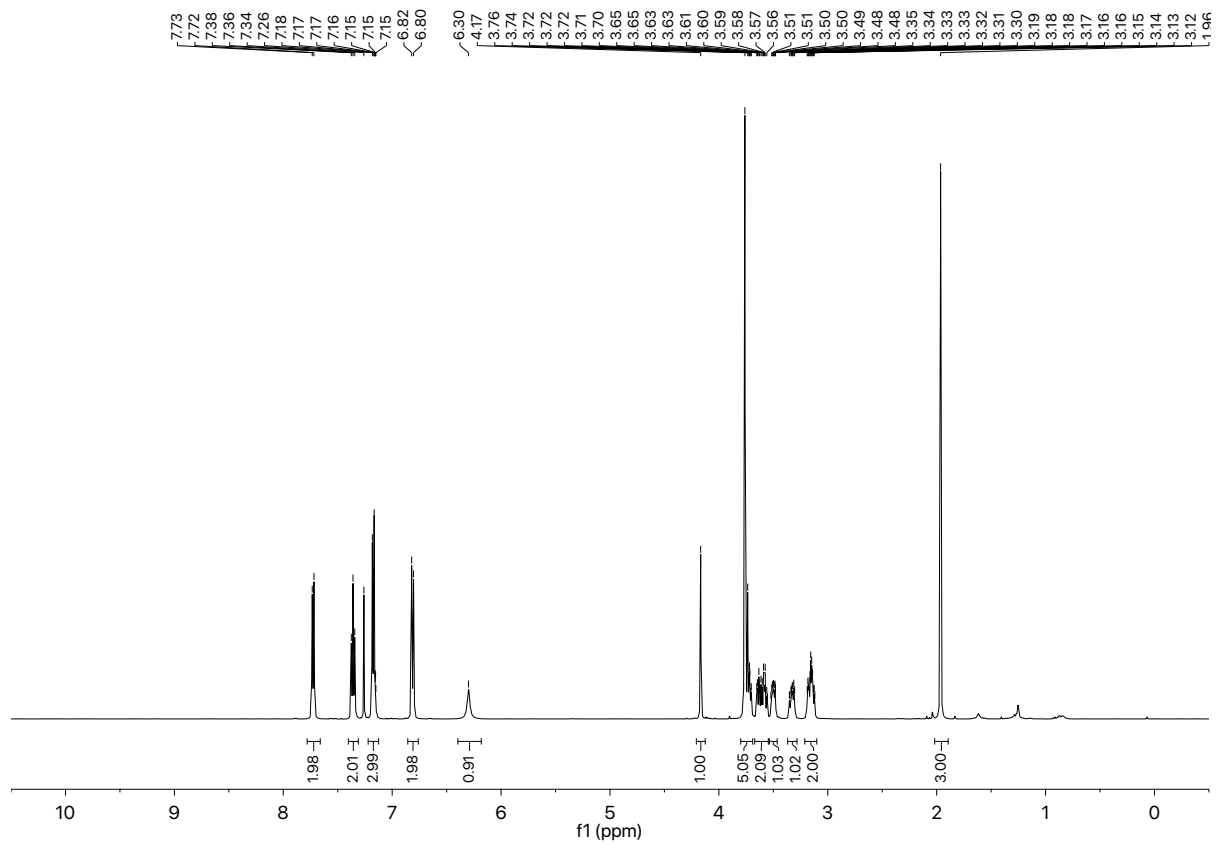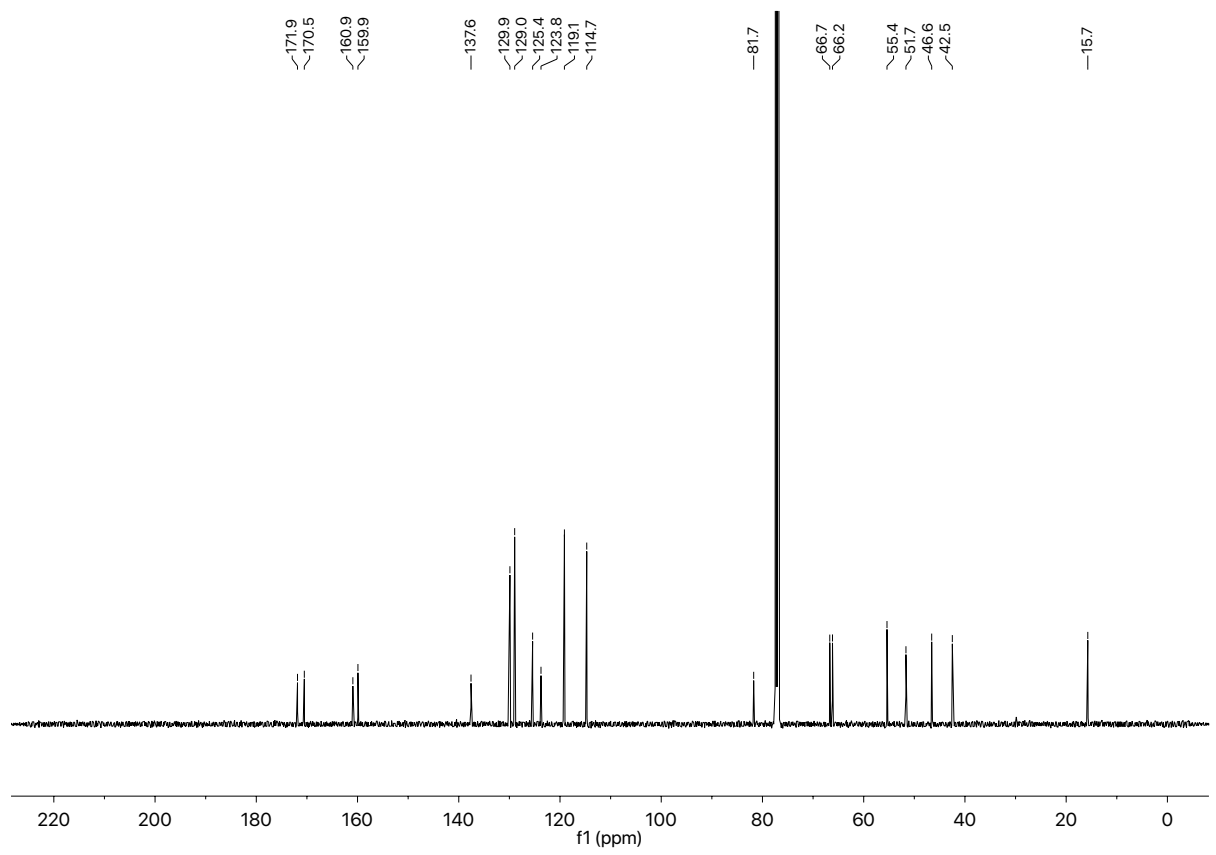

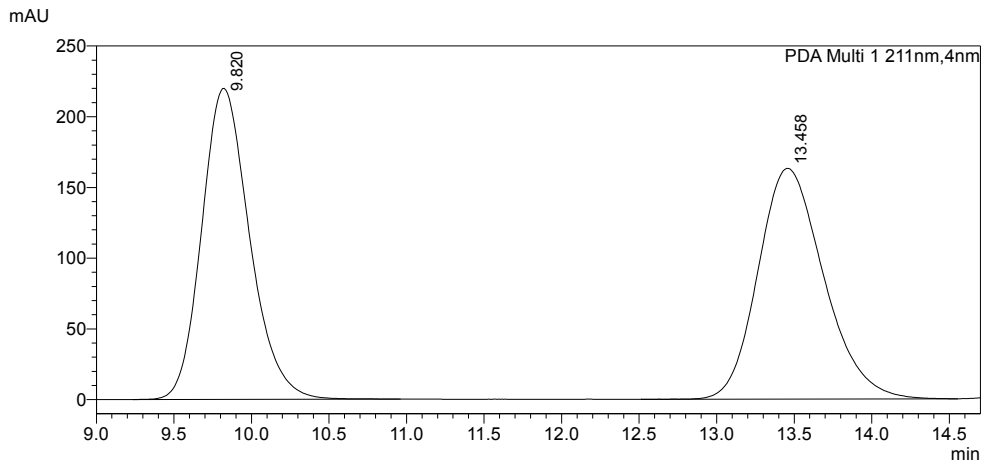

<Peak Table>

| PDA Ch1 211nm |           |         |
|---------------|-----------|---------|
| Peak#         | Ret. Time | Area%   |
| 1             | 9.820     | 49.597  |
| 2             | 13.458    | 50.403  |
| Total         |           | 100.000 |

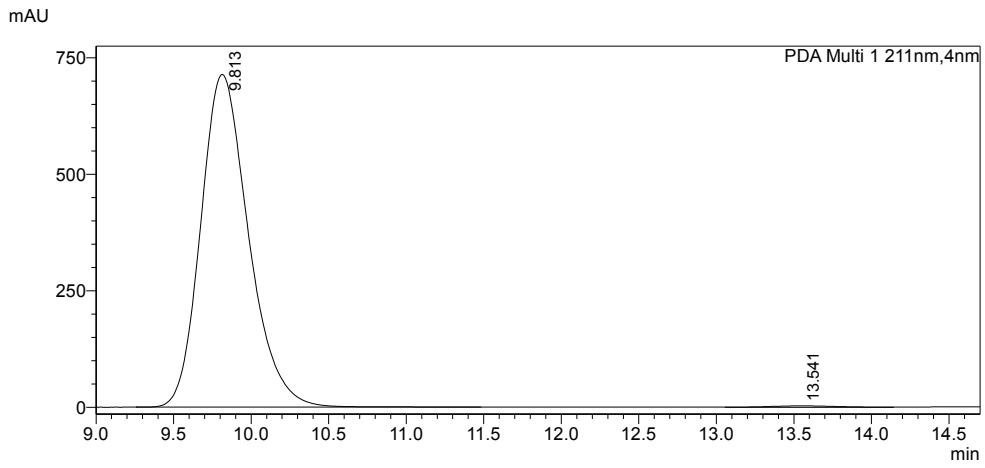

<Peak Table>

| PDA Ch1 211nm |           |         |
|---------------|-----------|---------|
| Peak#         | Ret. Time | Area%   |
| 1             | 9.813     | 99.462  |
| 2             | 13.541    | 0.538   |
| Total         |           | 100.000 |

5.10. (1'*R*,4*R*)- and (1'*S*,4*R*)-4-(1-(*m*-bromophenyl)-2-morpholine-2-oxoethyl)-4-hydroxy-5-methyl-2-phenyl-2,4-dihydro-3*H*-pyrazol-3-one **25**

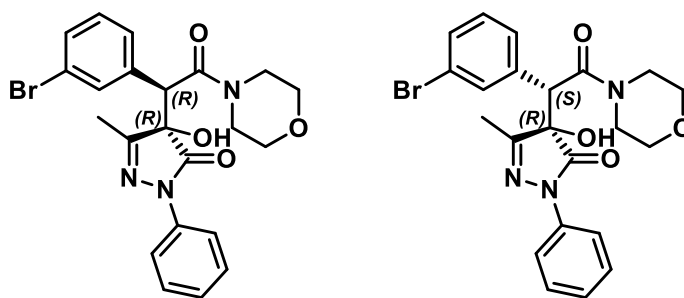

To a solution of 3-methyl-1-phenyl-1*H*-pyrazole-4,5-dione (47.1 mg, 0.25 mmol), 2-(*m*-bromophenyl)acetic anhydride (154.5 mg, 0.375 mmol) and (2*R*,3*S*)-HyperBTM (3.9 mg, 0.125 mmol) were dissolved in ethyl acetate (6 ml, 0.04 M) at 0 °C. Diisopropylethylamine (54  $\mu$ l, 0.31 mmol) was added and the reaction mixture was stirred at 0 °C for 3 h. Morpholine (66  $\mu$ l, 0.75 mmol) was added and the reaction mixture was stirred for 16 h at rt. The reaction mixture was diluted with ethyl acetate and washed sequentially with 1 M aq. HCl ( $\times 2$ ), sat. aq. NaHCO<sub>3</sub> ( $\times 2$ ), and brine ( $\times 1$ ). The organic layer was dried over MgSO<sub>4</sub>, filtered, and concentrated *in vacuo*. Purification by column chromatography (*n*-hexane : ethyl acetate 4:1 to 1:1) gave the title compound as a mixture of diastereomer as a white amorphous solid (44.2 mg, 0.09 mmol, 37%, 89:11 d.r.).  $[\alpha]_D^{20} +153.3$  (c 0.50, CDCl<sub>3</sub>); IR  $\nu_{\max}$  (film) 3323 (O-H), 3057 (C-H), 2970 (C-H), 2922 (C-H), 2857 (C-H), 1715 (C=O, pyrazolone), 1622, 1595, 1364, 1113, 758; HRMS (ESI<sup>+</sup>) C<sub>22</sub>H<sub>21</sub>BrN<sub>3</sub>O<sub>4</sub>Na [M(<sup>81</sup>Br)+Na]<sup>+</sup> found 496.06554, requires 496.06684 (−2.6 ppm). *Data for major diastereomer: HPLC Analysis:* Chiralpak AD-H (85:15 hexane:isopropanol, flow rate 2.0 ml·min<sup>−1</sup>, 211 nm, 30 °C)  $t_R$  (1'*R*,4*R*)-**25**: 7.1 min,  $t_R$  (1'*S*,4*S*)-**25**: 11.8 min, 98.5:1.5 er; <sup>1</sup>H NMR (500 MHz, CDCl<sub>3</sub>)  $\delta_H$ : 1.93 (3H, s, CH<sub>3</sub>), 3.16 (1H, ddd, <sup>2</sup>J<sub>HH</sub> = 13.3 Hz, <sup>3</sup>J<sub>HH</sub> = 6.4 Hz, 3.0 Hz, NCH<sub>A</sub>H<sub>B</sub>CH<sub>2</sub>), 3.22 (1H, ddd, <sup>2</sup>J<sub>HH</sub> = 11.5 Hz, <sup>3</sup>J<sub>HH</sub> = 6.6 Hz, 3.0 Hz, NCH<sub>2</sub>CH<sub>A</sub>H<sub>B</sub>), 3.35 (1H, ddd, <sup>2</sup>J<sub>HH</sub> = 13.3 Hz, <sup>3</sup>J<sub>HH</sub> = 6.6 Hz, 3.0 Hz, NCH<sub>A</sub>H<sub>B</sub>CH<sub>2</sub>), 3.54 (1H, ddd, <sup>2</sup>J<sub>HH</sub> = 11.5 Hz, <sup>3</sup>J<sub>HH</sub> = 6.4 Hz, 3.0 Hz, NCH<sub>2</sub>CH<sub>A</sub>H<sub>B</sub>), 3.61 (1H, ddd, <sup>2</sup>J<sub>HH</sub> = 11.1 Hz, <sup>3</sup>J<sub>HH</sub> = 5.6 Hz, 3.6 Hz, NCH<sub>2</sub>CH<sub>C</sub>H<sub>D</sub>), 3.68-3.77 (3H, m, NCH<sub>C</sub>H<sub>D</sub>CH<sub>2</sub>, NCH<sub>2</sub>CH<sub>C</sub>H<sub>D</sub>), 4.16 (1H, s, CHAr), 6.29 (1H, br s, OH), 7.16-7.25 (3H, m, NArC<sup>4</sup>H, 2 $\times$ CHArCH), 7.35-7.40 (2H, m, NArC<sup>3,5</sup>H), 7.44-7.49 (2H, m, 2 $\times$ CHArCH), 7.70-7.75 (2H, m, NArC<sup>2,6</sup>H); <sup>13</sup>C{<sup>1</sup>H} NMR (126 MHz, CDCl<sub>3</sub>)  $\delta_C$ : 15.6 (CH<sub>3</sub>), 42.6 (NCH<sub>C</sub>H<sub>D</sub>CH<sub>2</sub>), 46.6 (NCH<sub>A</sub>H<sub>B</sub>CH<sub>2</sub>), 51.6 (CHAr), 66.1 (NCH<sub>2</sub>CH<sub>A</sub>H<sub>B</sub>), 66.7 (NCH<sub>2</sub>CH<sub>C</sub>H<sub>D</sub>), 81.5 (C-OH), 119.2 (NArC<sup>2,6</sup>H), 123.3 (CHArC<sup>3</sup>Br), 125.6 (NArC<sup>4</sup>H), 127.4 (CHArCH), 129.0 (NArC<sup>3,5</sup>H), 130.8 (CHArCH), 131.8 (CHArCH), 132.2 (CHArCH), 134.3 (CHArC<sup>1</sup>), 137.3 (NArC<sup>1</sup>), 160.3 (C=N), 169.5 (CON(CH<sub>2</sub>CH<sub>2</sub>)<sub>2</sub>O), 171.5 (CONAr); *Data for minor diastereomer: HPLC Analysis:* Chiralpak AD-H (85:15 hexane:isopropanol, flow rate 2.0 ml·min<sup>−1</sup>, 211 nm, 30 °C)  $t_R$  (1'*S*,4*R*)-**25**: 6.3 min,  $t_R$  (1'*R*,4*S*)-**25**: 15.7 min, 97.5:2.5 er; <sup>1</sup>H NMR (500 MHz, CDCl<sub>3</sub>) (selected)  $\delta_H$ : 1.96

(3H, s, CH<sub>3</sub>), 4.14 (1H, s, CHAr), 7.54 (1H, m, ArCH), 7.74-7.78 (1H, m, NArC<sup>2,6</sup>H); <sup>13</sup>C{<sup>1</sup>H} NMR (126 MHz, CDCl<sub>3</sub>) (selected) δ<sub>c</sub>: 15.0 (CH<sub>3</sub>), 42.4 (NCH<sub>2</sub>CH<sub>2</sub>), 46.5 (NCH<sub>2</sub>CH<sub>2</sub>), 52.4 (CHAr), 80.0 (C-OH), 118.9 (NArC<sup>2,6</sup>H), 122.9 (CHArC<sup>3</sup>Br), 125.3 (NArC<sup>4</sup>H), 128.5 (ArCH), 128.9 (NArC<sup>3,5</sup>H), 130.3 (ArCH), 131.9 (ArCH), 132.8 (ArCH), 134.2 (CHArC<sup>1</sup>), 137.7 (NArC<sup>1</sup>), 168.5 (CON(CH<sub>2</sub>CH<sub>2</sub>)<sub>2</sub>O), 171.0 (CONAr).

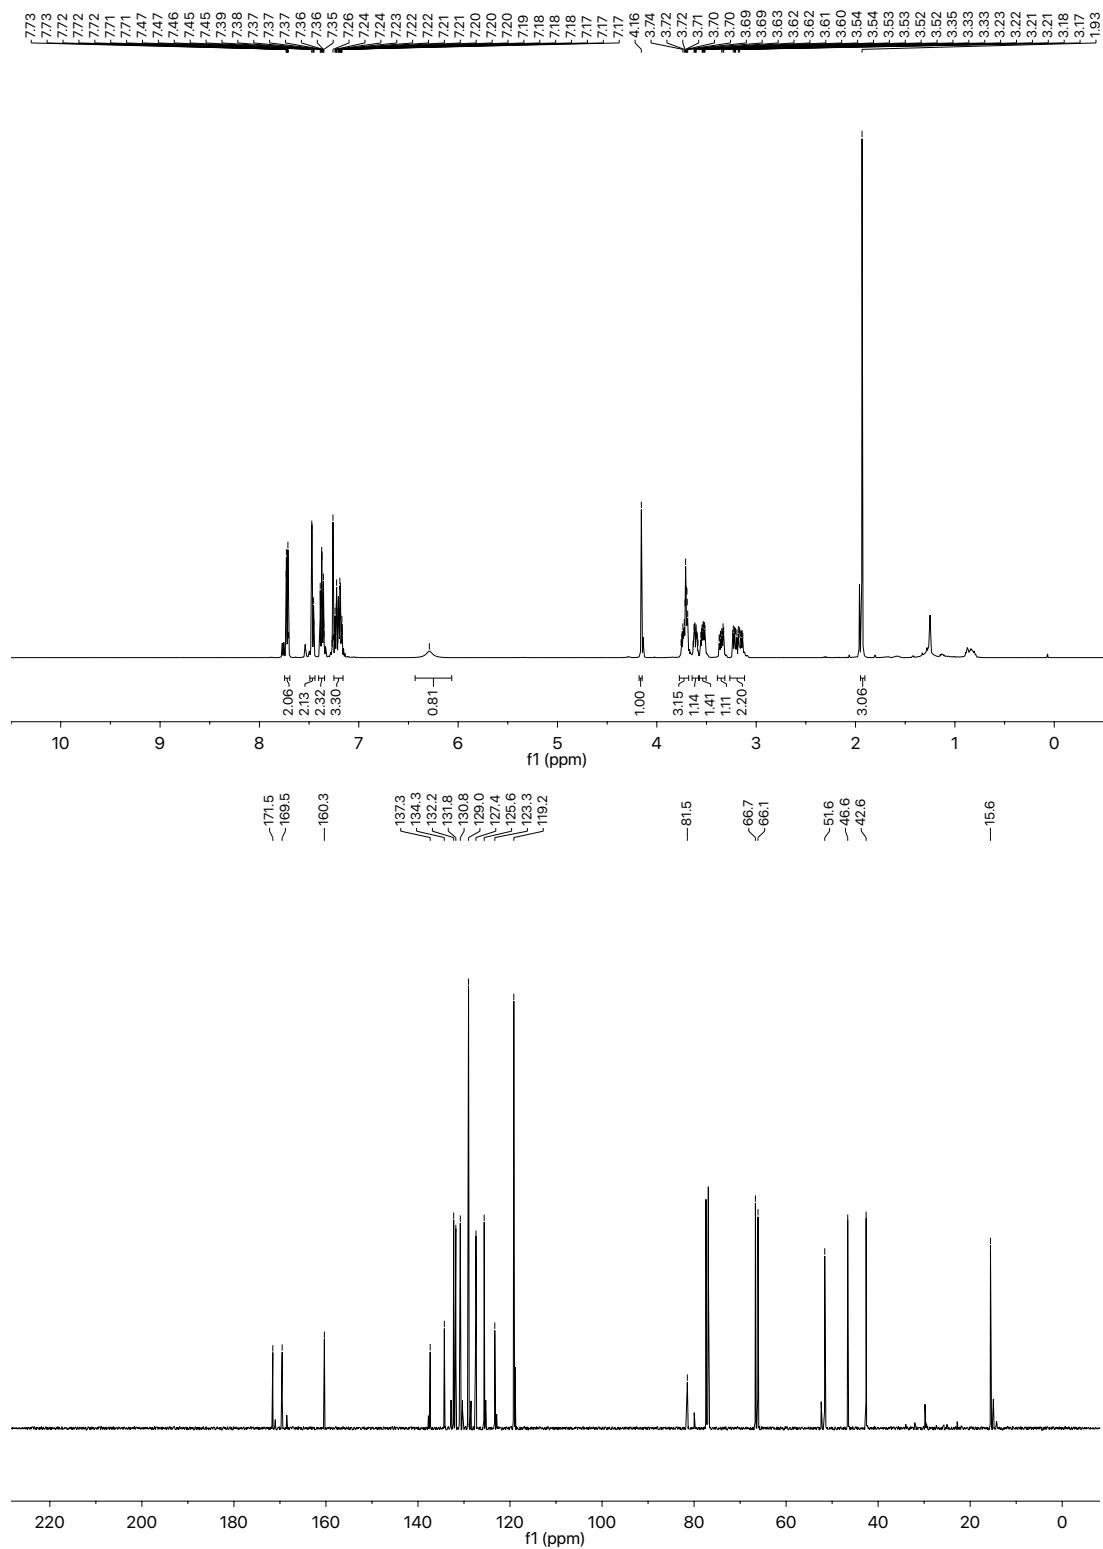

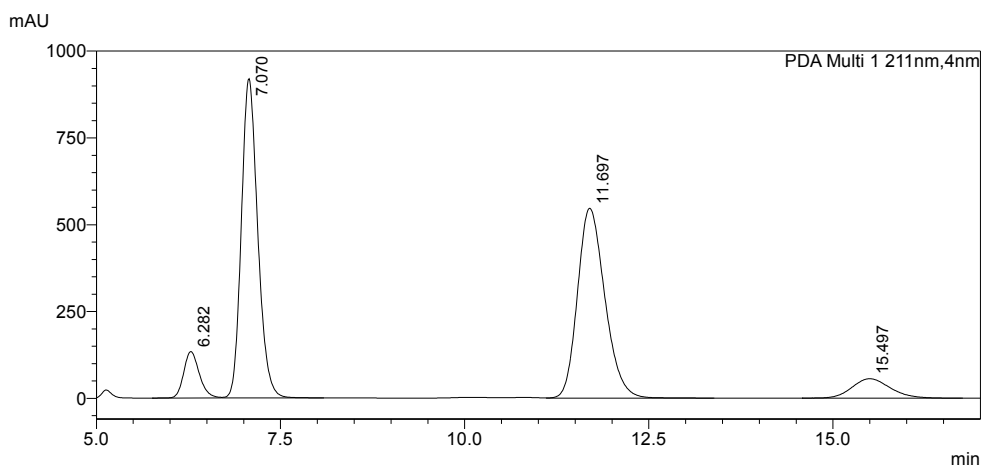

**<Peak Table>**

PDA Ch1 211nm

| Peak# | Ret. Time | Area%   |
|-------|-----------|---------|
| 1     | 6.282     | 6.111   |
| 2     | 7.070     | 43.961  |
| 3     | 11.697    | 43.693  |
| 4     | 15.497    | 6.235   |
| Total |           | 100.000 |

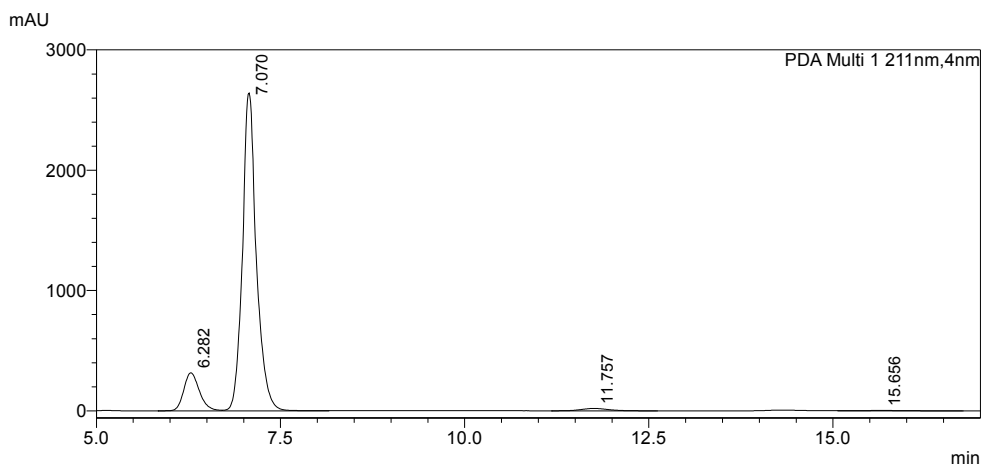

**<Peak Table>**

PDA Ch1 211nm

| Peak# | Ret. Time | Area%   |
|-------|-----------|---------|
| 1     | 6.282     | 11.638  |
| 2     | 7.070     | 86.773  |
| 3     | 11.757    | 1.262   |
| 4     | 15.656    | 0.327   |
| Total |           | 100.000 |

5.11. (1'*R*,4*R*)- and (1'*S*,4*R*)-4-hydroxy-5-methyl-4-(2-morpholino-2-oxo-1-(*o*-tolyl)ethyl)-2-phenyl-2,4-dihydro-3*H*-pyrazol-3-one **26**

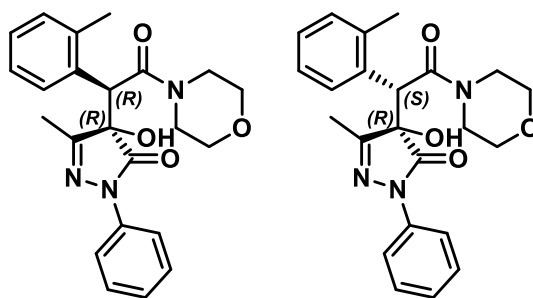

To a solution of 3-methyl-1-phenyl-1*H*-pyrazole-4,5-dione (47.1 mg, 0.25 mmol), 2-(*o*-tolyl)acetic anhydride (105.9 mg, 0.375 mmol) and (2*R*,3*S*)-HyperBTM (3.9 mg, 0.125 mmol) were dissolved in ethyl acetate (6 ml, 0.04 M) at 0 °C. Diisopropylethylamine (54  $\mu$ l, 0.31 mmol) was added and the reaction mixture was stirred at 0 °C for 3 h. Morpholine (66  $\mu$ l, 0.75 mmol) was added and the reaction mixture was stirred for 16 h at rt. The reaction mixture was diluted with ethyl acetate and washed sequentially with 1 M aq. HCl ( $\times$ 2), sat. aq. NaHCO<sub>3</sub> ( $\times$ 2), and brine ( $\times$ 1). The organic layer was dried over MgSO<sub>4</sub>, filtered, and concentrated *in vacuo*. Purification by column chromatography (*n*-hexane : ethyl acetate 4:1 to 1:1) gave the title compound as a mixture of diastereomers as white amorphous solid (98.0 mg, 0.24 mmol, 96%, >95:5 d.r.).  $[\alpha]_D^{20} +238.7$  (c 0.82, CHCl<sub>3</sub>); IR  $\nu_{\max}$  (film) 3312 (O-H), 2965 (C-H), 2922 (C-H), 2857 (C-H), 2249, 1717 (C=O, pyrazolone), 1639, 1620, 1597, 1499, 1435, 1360, 1225, 1113, 908, 754; HRMS (ESI<sup>+</sup>) C<sub>23</sub>H<sub>26</sub>N<sub>3</sub>O<sub>4</sub> [M+H]<sup>+</sup> found 408.1910, requires 408.19178 (−1.9 ppm). **Data for major diastereomer: HPLC Analysis:** Chiralpak AD-H (95:5 hexane:isopropanol, flow rate 2.0 ml·min<sup>−1</sup>, 211 nm, 30 °C)  $t_R$  (1'*R*,4*R*)-**26**: 16.9 min,  $t_R$  (1'*S*,4*S*)-**26**: 36.0 min, >99:1 er; **<sup>1</sup>H NMR** (500 MHz, CDCl<sub>3</sub>)  $\delta_H$ : 1.61 (3H, s, C<sup>5</sup>CH<sub>3</sub>), 2.30 (3H, s, ArC<sup>2</sup>CH<sub>3</sub>), 2.98 (1H, ddd, <sup>2</sup> $J_{HH} = 10.9$  Hz, <sup>3</sup> $J_{HH} = 7.4$  Hz, 2.9 Hz, NCH<sub>2</sub>CH<sub>A</sub>H<sub>B</sub>), 3.08 (1H, ddd, <sup>2</sup> $J_{HH} = 13.5$  Hz, <sup>3</sup> $J_{HH} = 5.8$  Hz, 2.9 Hz, NCH<sub>A</sub>H<sub>B</sub>CH<sub>2</sub>), 3.31 (1H, ddd, <sup>2</sup> $J_{HH} = 13.5$  Hz, <sup>3</sup> $J_{HH} = 7.4$  Hz, 3.0 Hz, NCH<sub>A</sub>H<sub>B</sub>CH<sub>2</sub>), 3.45-3.54 (2H, m, NCH<sub>2</sub>CH<sub>A</sub>H<sub>B</sub>, NCH<sub>2</sub>CH<sub>C</sub>H<sub>D</sub>), 3.59 (1H, ddd, <sup>2</sup> $J_{HH} = 13.2$  Hz, <sup>3</sup> $J_{HH} = 7.5$  Hz, 2.9 Hz, NCH<sub>C</sub>H<sub>D</sub>CH<sub>2</sub>), 3.72 (1H, ddd, <sup>2</sup> $J_{HH} = 11.6$  Hz, <sup>3</sup> $J_{HH} = 5.8$  Hz, 2.9 Hz, NCH<sub>2</sub>CH<sub>C</sub>H<sub>D</sub>), 3.79 (1H, ddd, <sup>2</sup> $J_{HH} = 13.2$  Hz, <sup>3</sup> $J_{HH} = 5.8$  Hz, 2.8 Hz, NCH<sub>C</sub>H<sub>D</sub>CH<sub>2</sub>), 4.21 (1H, s, CHAr), 7.16-7.21 (2H, m, NArC<sup>4</sup>H, CHArC<sup>3</sup>H), 7.26-7.30 (2H, m, CHArC<sup>4,5</sup>H), 7.36-7.44 (3H, m, OH, NArC<sup>3,5</sup>H), 7.61-7.68 (1H, m, CHArC<sup>6</sup>H), 7.80-7.87 (2H, m, NArC<sup>2,6</sup>H); **<sup>13</sup>C{<sup>1</sup>H} NMR** (126 MHz, CDCl<sub>3</sub>)  $\delta_C$ : 14.5 (C<sup>5</sup>CH<sub>3</sub>), 20.0 (ArC<sup>2</sup>CH<sub>3</sub>), 42.8 (NCH<sub>C</sub>H<sub>D</sub>CH<sub>2</sub>), 44.8 (CHAr), 46.2 (NCH<sub>A</sub>H<sub>B</sub>CH<sub>2</sub>), 66.0 (NCH<sub>2</sub>CH<sub>A</sub>H<sub>B</sub>), 66.6 (NCH<sub>C</sub>H<sub>D</sub>CH<sub>2</sub>), 81.0 (C-OH), 118.8 (NArC<sup>2,6</sup>H), 125.2 (NArC<sup>4</sup>H), 127.2 (CHArC<sup>5</sup>H), 129.0 (NArC<sup>3,5</sup>H, CHArC<sup>4</sup>H), 129.6 (CHArC<sup>6</sup>H), 130.5 (CHArC<sup>1</sup>), 131.2 (CHArC<sup>3</sup>H), 135.6 (CHArC<sup>2</sup>CH<sub>3</sub>), 137.9 (NArC<sup>1</sup>), 160.7 (C=N), 170.8 (CON(CH<sub>2</sub>CH<sub>2</sub>)<sub>2</sub>O), 173.0 (CONAr); **Data for minor diastereomer: HPLC Analysis:** Chiralpak AD-H (95:5 hexane:isopropanol, flow rate

2.0 ml·min<sup>-1</sup>, 211 nm, 30 °C) t<sub>R</sub> (1'S,4R)-**26**: 24.2 min, t<sub>R</sub> (1'R,4S)-**26**: 41.0 min (not detected);  
<sup>1</sup>H NMR (500 MHz, CDCl<sub>3</sub>) (*selected*) δ<sub>H</sub>: 2.15 (3H, s, C<sup>5</sup>CH<sub>3</sub>), 2.25 (3H, s, ArC<sup>2</sup>CH<sub>3</sub>), 2.79 (1H, ddd, <sup>2</sup>J<sub>HH</sub> = 11.2 Hz, <sup>3</sup>J<sub>HH</sub> = 7.9 Hz, 2.8 Hz, NCH<sub>2</sub>CH<sub>2</sub>), 3.23 (1H, ddd, <sup>2</sup>J<sub>HH</sub> = 11.9 Hz, <sup>3</sup>J<sub>HH</sub> = 7.8 Hz, 3.0 Hz, NCH<sub>2</sub>CH<sub>2</sub>), 4.12 (1H, s, CHAr); <sup>13</sup>C{<sup>1</sup>H} NMR (126 MHz, CDCl<sub>3</sub>) (*selected*) δ<sub>C</sub>: 15.4 (C<sup>5</sup>CH<sub>3</sub>), 42.6 (NCH<sub>2</sub>CH<sub>2</sub>), 46.0 (NCH<sub>2</sub>CH<sub>2</sub>), 47.0 (CHAr), 80.9 (C-OH), 118.6 (NArC<sup>2,6</sup>H), 125.1 (NArC<sup>4</sup>H), 126.9 (ArCH), 128.8 (ArCH).

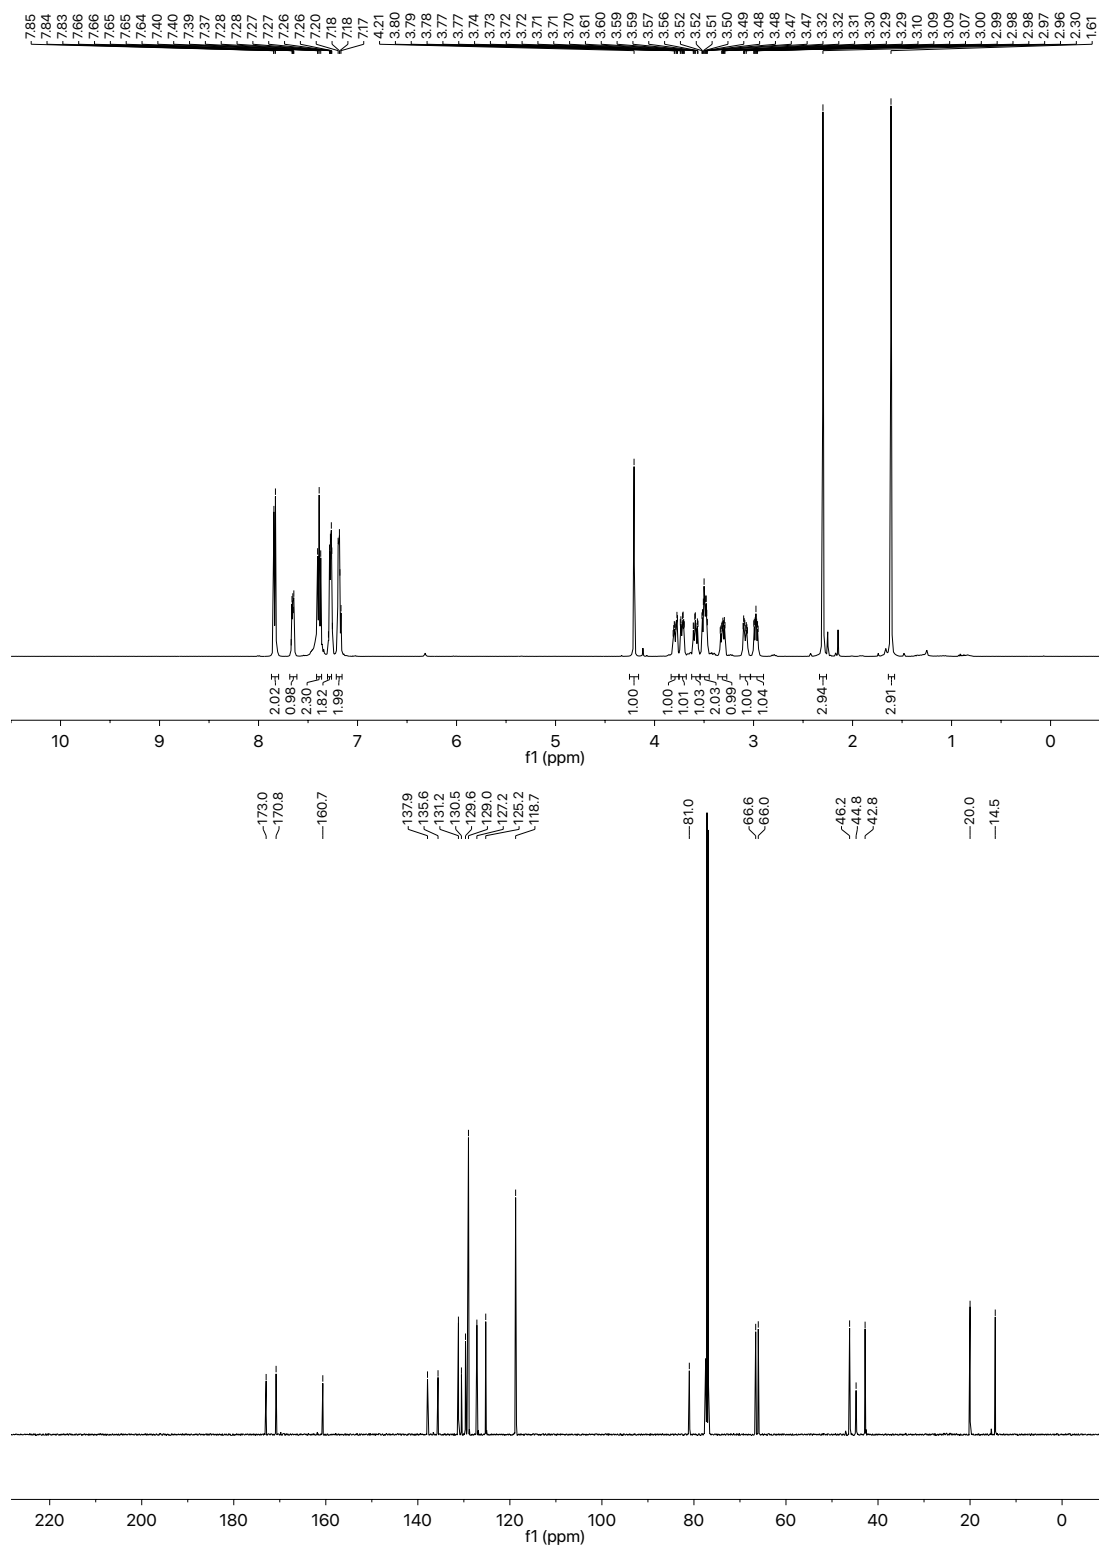

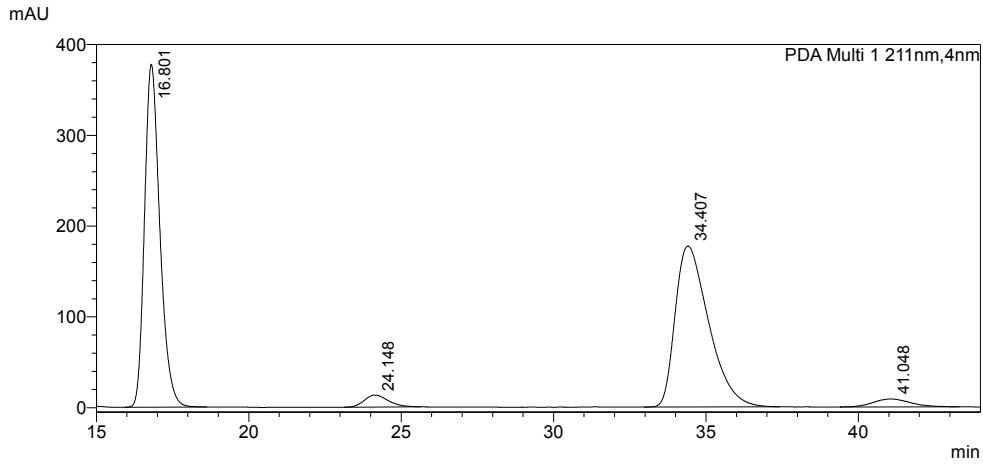

**<Peak Table>**

| PDA Ch1 211nm |           |         |
|---------------|-----------|---------|
| Peak#         | Ret. Time | Area%   |
| 1             | 16.801    | 46.799  |
| 2             | 24.148    | 2.575   |
| 3             | 34.407    | 47.943  |
| 4             | 41.048    | 2.683   |
| Total         |           | 100.000 |

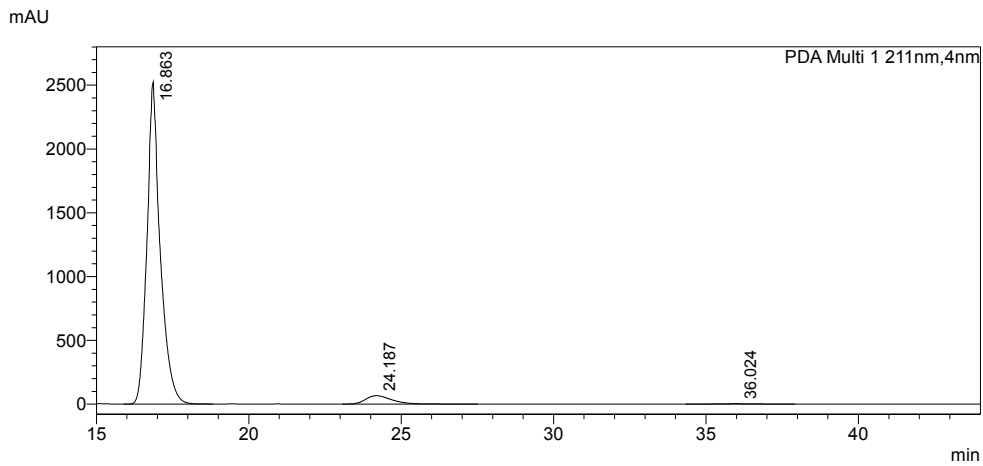

**<Peak Table>**

| PDA Ch1 211nm |           |         |
|---------------|-----------|---------|
| Peak#         | Ret. Time | Area%   |
| 1             | 16.863    | 94.867  |
| 2             | 24.187    | 4.897   |
| 3             | 36.024    | 0.236   |
| Total         |           | 100.000 |



5.12. (1'*R*,4*R*)-4-hydroxy-5-methyl-4-(1-(1-methyl-1*H*-indol-3-yl)-2-morpholino-2-oxoethyl)-2-phenyl-2,4-dihydro-3*H*-pyrazol-3-one **27**

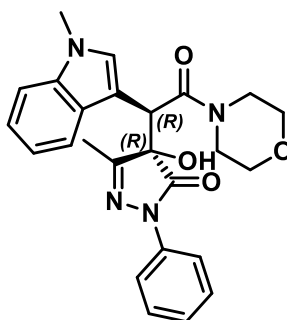

To a solution of 3-methyl-1-phenyl-1*H*-pyrazole-4,5-dione (47.1 mg, 0.25 mmol), 2-(1-methyl-1*H*-indol-3-yl)acetic anhydride (135.2 mg, 0.375 mmol) and (2*R*,3*S*)-HyperBTM (3.9 mg, 0.125 mmol) were dissolved in ethyl acetate (6 ml, 0.04 M) at 0 °C. Diisopropylethylamine (54 µl, 0.31 mmol) was added and the reaction mixture was stirred at 0 °C for 3 h. Morpholine (66 µl, 0.75 mmol) was added and the reaction mixture was stirred for 16 h at rt. The reaction mixture was diluted with ethyl acetate and washed sequentially with 1 M aq. HCl (×2), sat. aq. NaHCO<sub>3</sub> (×2), and brine (×1). The organic layer was dried over MgSO<sub>4</sub>, filtered, and concentrated *in vacuo*. Purification by column chromatography (*n*-hexane : ethyl acetate 4:1 to 1:1) gave the title compound as white amorphous solid (80.6 mg, 0.18 mmol, 72%).  $[\alpha]_{\text{D}}^{20} +262.9$  (c 0.48, CHCl<sub>3</sub>); **HPLC Analysis**: Chiralpak AD-H (85:15 hexane:isopropanol, flow rate 2.0 ml·min<sup>-1</sup>, 211 nm, 30 °C)  $t_{\text{R}}$  (1'*R*,4*R*)-**27**: 7.1 min,  $t_{\text{R}}$  (1'*S*,4*S*)-**27**: 22.9 min, 96:4 er; **IR**  $\nu_{\text{max}}$  (film) 3354 (O-H), 3059, 2922 (C-H), 2859 (C-H), 2247, 1717 (C=O, pyrazolone), 1620, 1595, 1501, 1362, 1115, 908; **<sup>1</sup>H NMR** (500 MHz, CDCl<sub>3</sub>)  $\delta_{\text{H}}$ : 1.81 (3H, s, C<sup>5</sup>CH<sub>3</sub>), 3.11 (1H, ddd, <sup>2</sup> $J_{\text{HH}} = 11.4$  Hz, <sup>3</sup> $J_{\text{HH}} = 6.5$  Hz, 3.0 Hz, NCH<sub>2</sub>CH<sub>A</sub>H<sub>B</sub>), 3.19 (1H, ddd, <sup>2</sup> $J_{\text{HH}} = 13.4$  Hz, <sup>3</sup> $J_{\text{HH}} = 6.6$  Hz, 3.0 Hz, NCH<sub>A</sub>H<sub>B</sub>CH<sub>2</sub>), 3.40 (1H, ddd, <sup>2</sup> $J_{\text{HH}} = 13.4$  Hz, <sup>3</sup> $J_{\text{HH}} = 6.5$  Hz, 3.0 Hz, NCH<sub>A</sub>H<sub>B</sub>CH<sub>2</sub>), 3.46 (1H, ddd, <sup>2</sup> $J_{\text{HH}} = 11.4$  Hz, <sup>3</sup> $J_{\text{HH}} = 6.6$  Hz, 3.0 Hz, NCH<sub>2</sub>CH<sub>A</sub>H<sub>B</sub>), 3.56-3.63 (1H, m, NCH<sub>2</sub>CH<sub>C</sub>H<sub>D</sub>), 3.64-3.77 (6H, m, NCH<sub>C</sub>H<sub>D</sub>CH<sub>2</sub>, NCH<sub>2</sub>CH<sub>C</sub>H<sub>D</sub>, NCH<sub>3</sub>), 4.48 (1H, s, CHAr), 6.61 (1H, br s, OH), 7.12 (1H, t, <sup>3</sup> $J_{\text{HH}} = 7.5$  Hz, CHArC<sup>5</sup>H), 7.14-7.20 (2H, m, NArC<sup>4</sup>H, CHArC<sup>2</sup>H), 7.24 (1H, t, <sup>3</sup> $J_{\text{HH}} = 7.5$  Hz, CHArC<sup>6</sup>H), 7.31 (1H, d, <sup>3</sup> $J_{\text{HH}} = 8.2$  Hz, CHArC<sup>7</sup>H), 7.36 (2H, app t, <sup>3</sup> $J_{\text{HH}} = 8.0$  Hz, NArC<sup>3,5</sup>H), 7.50 (1H, d, <sup>3</sup> $J_{\text{HH}} = 8.0$  Hz, CHArC<sup>4</sup>H), 7.74 (2H, d, <sup>3</sup> $J_{\text{HH}} = 7.9$  Hz, NArC<sup>2,6</sup>H); **<sup>13</sup>C{<sup>1</sup>H} NMR** (126 MHz, CDCl<sub>3</sub>)  $\delta_{\text{C}}$ : 15.3 (C<sup>5</sup>CH<sub>3</sub>), 33.2 (NCH<sub>3</sub>), 42.5 (NCH<sub>C</sub>H<sub>D</sub>CH<sub>2</sub>), 42.6 (CHAr), 46.6 (NCH<sub>A</sub>H<sub>B</sub>CH<sub>2</sub>), 66.2 (NCH<sub>2</sub>CH<sub>A</sub>H<sub>B</sub>), 66.6 (NCH<sub>2</sub>CH<sub>C</sub>H<sub>D</sub>), 81.3 (C-OH), 104.3 (CHArC<sup>3</sup>), 110.0 (CHArC<sup>7</sup>H), 117.8 (CHArC<sup>4</sup>H), 119.0 (NArC<sup>2,6</sup>H), 120.3 (CHArC<sup>5</sup>H), 122.5 (CHArC<sup>6</sup>H), 125.3 (NArC<sup>4</sup>H), 126.6 (CHArC<sup>3a</sup>), 128.9 (CHArC<sup>2</sup>H), 129.1 (NArC<sup>3,5</sup>H), 136.5 (CHArC<sup>7a</sup>), 137.7 (NArC<sup>1</sup>), 161.3 (C=N), 171.2 (CON(CH<sub>2</sub>CH<sub>2</sub>)<sub>2</sub>O), 172.6 (CONAr); **HRMS** (ESI<sup>+</sup>) C<sub>25</sub>H<sub>27</sub>N<sub>4</sub>O<sub>4</sub> [M+H]<sup>+</sup> found 447.2018, requires 447.20275 (-1.9 ppm).

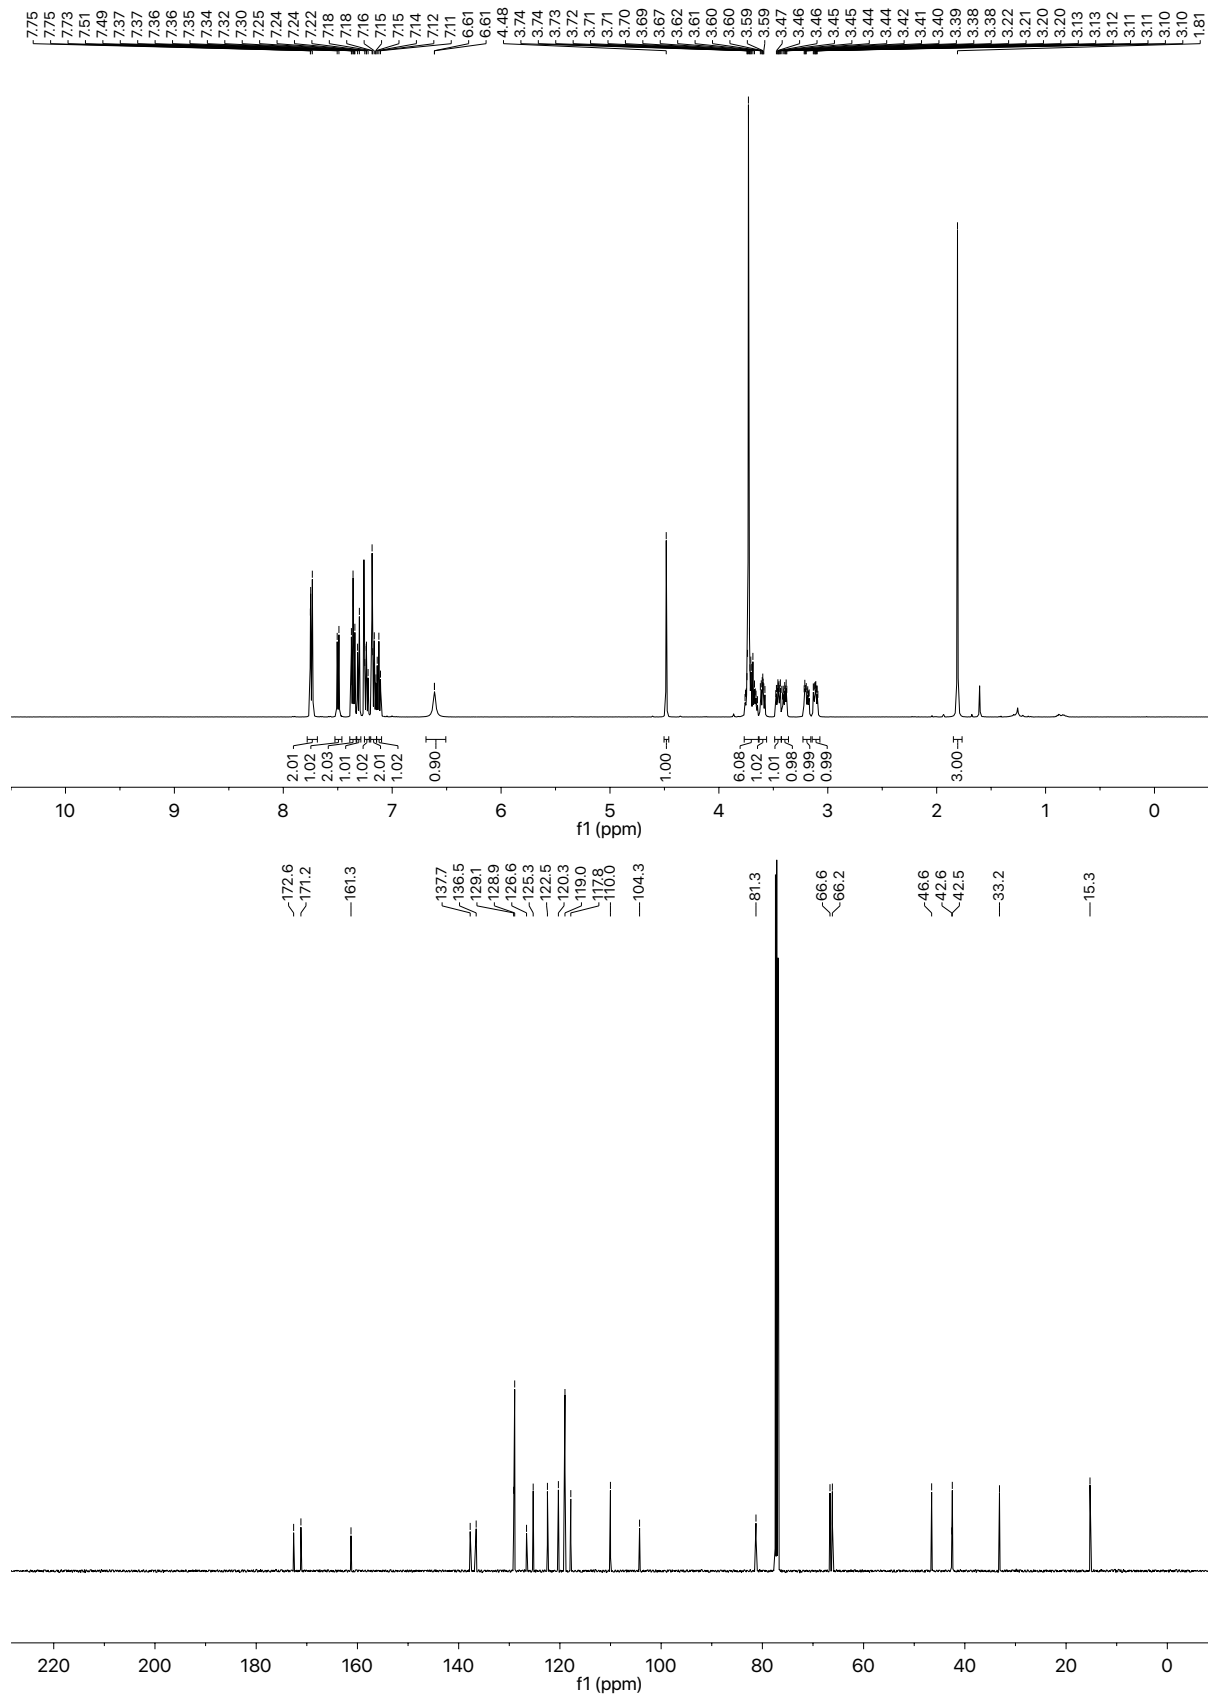

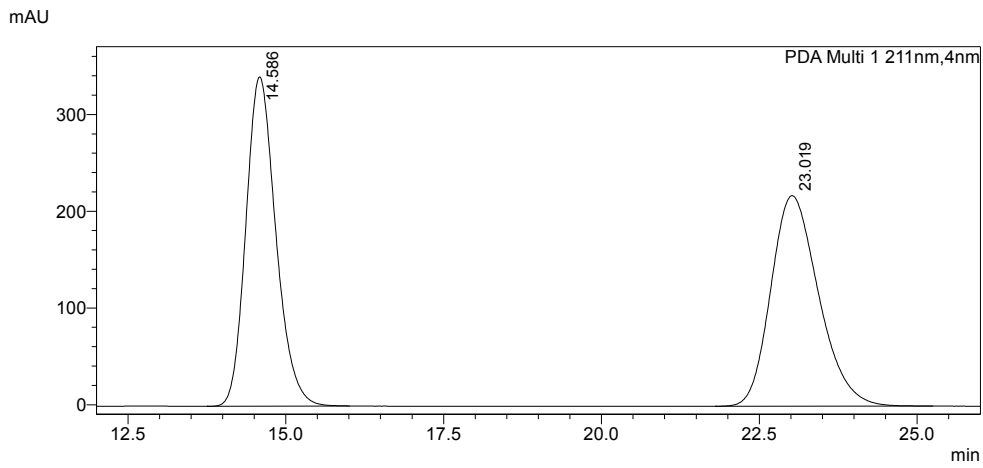

**<Peak Table>**

| PDA Ch1 211nm |           |         |
|---------------|-----------|---------|
| Peak#         | Ret. Time | Area%   |
| 1             | 14.586    | 49.523  |
| 2             | 23.019    | 50.477  |
| Total         |           | 100.000 |

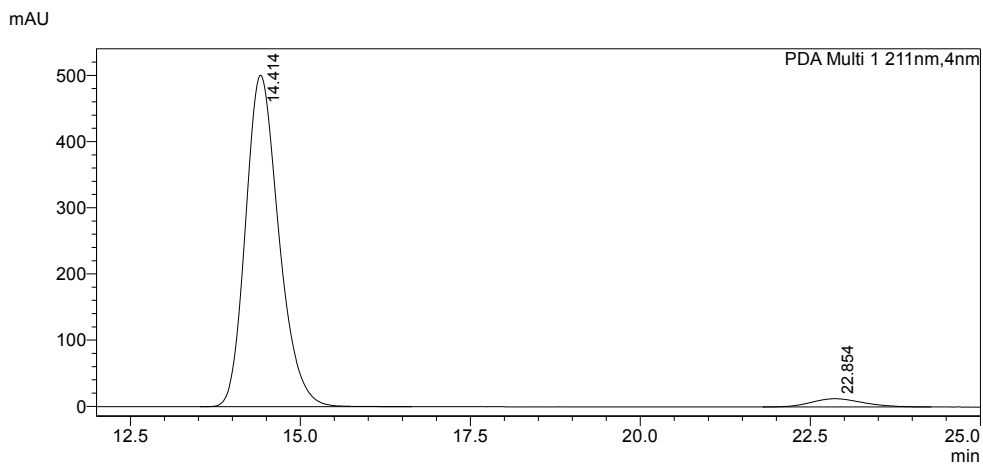

**<Peak Table>**

| PDA Ch1 211nm |           |         |
|---------------|-----------|---------|
| Peak#         | Ret. Time | Area%   |
| 1             | 14.414    | 96.239  |
| 2             | 22.854    | 3.761   |
| Total         |           | 100.000 |

5.13. (1'*R*,4*R*)- and (1'*S*,4*R*)-4-hydroxy-5-methyl-4-(2-morpholino-2-oxo-1-thiophen-2-ylethyl)-2-phenyl-2,4-dihydro-3*H*-pyrazol-3-one **28**

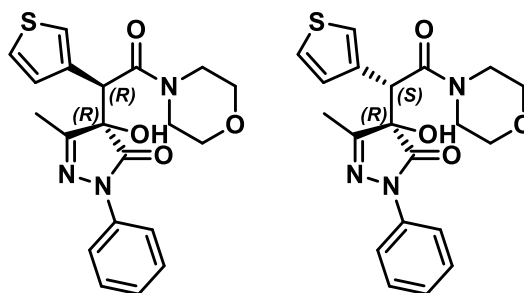

To a solution of 3-methyl-1-phenyl-1*H*-pyrazole-4,5-dione (47.1 mg, 0.25 mmol), 2-(thiophen-3-yl)acetic anhydride (99.9 mg, 0.375 mmol) and (2*R*,3*S*)-HyperBTM (3.9 mg, 0.125 mmol) were dissolved in ethyl acetate (6 ml, 0.04 M) at 0 °C. Diisopropylethylamine (54  $\mu$ l, 0.31 mmol) was added and the reaction mixture was stirred at 0 °C for 3 h. Morpholine (66  $\mu$ l, 0.75 mmol) was added and the reaction mixture was stirred for 16 h at rt. The reaction mixture was diluted with ethyl acetate and washed sequentially with 1 M aq. HCl ( $\times 2$ ), sat. aq. NaHCO<sub>3</sub> ( $\times 2$ ), and brine ( $\times 1$ ). The organic layer was dried over MgSO<sub>4</sub>, filtered, and concentrated *in vacuo*. Purification by column chromatography (*n*-hexane : ethyl acetate 4:1 to 1:1) gave the title compound as a mixture of diastereomers as white amorphous solid (49.9 mg, 0.125 mmol, 50%, 83:17 d.r.). [ $\alpha$ ]<sub>D</sub><sup>20</sup> +193.1 (c 1.00, CHCl<sub>3</sub>); IR  $\nu_{\max}$  (film) 3347 (O-H), 2967 (C-H), 2922 (C-H), 2857 (C-H), 1715 (C=O, pyrazolone), 1639, 1622, 1595, 1501, 1364, 1233, 1115, 756; HRMS (ESI<sup>+</sup>) C<sub>20</sub>H<sub>20</sub>N<sub>3</sub>O<sub>4</sub>Na [M+Na]<sup>+</sup> found 422.11337, requires 422.11450 (−2.7 ppm). *Data for major diastereomer: HPLC Analysis:* Chiralpak AD-H (98:2 hexane:isopropanol, flow rate 2.0 ml·min<sup>−1</sup>, 211 nm, 30 °C) *t*<sub>R</sub> (1'*R*,4*R*)-**28**: 25.6 min, *t*<sub>R</sub> (1'*S*,4*S*)-**28**: 43.6 min, >99:1 er; <sup>1</sup>H NMR (500 MHz, CDCl<sub>3</sub>)  $\delta$ <sub>H</sub>: 1.95 (3H, s, CH<sub>3</sub>), 3.20-3.26 (2H, m, NCH<sub>A</sub>H<sub>B</sub>CH<sub>2</sub>, NCH<sub>2</sub>CH<sub>A</sub>H<sub>B</sub>), 3.36 (1H, ddd, <sup>2</sup>J<sub>HH</sub> = 12.3 Hz, <sup>3</sup>J<sub>HH</sub> = 6.6 Hz, 3.0 Hz, NCH<sub>A</sub>H<sub>B</sub>CH<sub>2</sub>), 3.51-3.76 (5H, m, NCH<sub>C</sub>H<sub>D</sub>CH<sub>2</sub>, NCH<sub>2</sub>CH<sub>A</sub>H<sub>B</sub>, NCH<sub>2</sub>CH<sub>C</sub>H<sub>D</sub>), 4.36 (1H, s, CHAr), 6.36 (1H, br s, OH), 7.01 (1H, dd, <sup>3</sup>J<sub>HH</sub> = 5.0 Hz, <sup>4</sup>J<sub>HH</sub> = 1.4 Hz, CHAr<sup>C4</sup>H), 7.18 (1H, tt, <sup>3</sup>J<sub>HH</sub> 7.4, <sup>4</sup>J<sub>HH</sub> = 1.2, NArC<sup>4</sup>H), 7.21 (1H, dd, <sup>4</sup>J<sub>HH</sub> = 3.0 Hz, 1.4 Hz, CHAr<sup>C2</sup>H), 7.31 (1H, dd, <sup>3</sup>J<sub>HH</sub> 5.0 Hz, <sup>4</sup>J<sub>HH</sub> = 3.0 Hz, CHAr<sup>C5</sup>H), 7.35-7.40 (2H, m, NArC<sup>3,5</sup>H), 7.74-7.77 (2H, m, NArC<sup>2,6</sup>H); <sup>13</sup>C{<sup>1</sup>H} NMR (126 MHz, CDCl<sub>3</sub>)  $\delta$ <sub>C</sub>: 15.4 (CH<sub>3</sub>), 42.6 (NCH<sub>C</sub>H<sub>D</sub>CH<sub>2</sub>), 46.6 (NCH<sub>A</sub>H<sub>B</sub>CH<sub>2</sub>), 47.2 (CHAr), 66.2 (NCH<sub>2</sub>CH<sub>A</sub>H<sub>B</sub>), 66.7 (NCH<sub>2</sub>CH<sub>C</sub>H<sub>D</sub>), 81.3 (C-OH), 119.0 (NArC<sup>2,6</sup>H), 124.5 (CHAr<sup>C2</sup>H), 125.5 (NArC<sup>4</sup>H), 127.3 (CHAr<sup>C5</sup>H), 127.4 (CHAr<sup>C4</sup>H), 129.0 (NArC<sup>3,5</sup>H), 132.0 (CHAr<sup>C3</sup>), 137.6 (NArC<sup>1</sup>), 160.8 (C=N), 170.0 (CON(CH<sub>2</sub>CH<sub>2</sub>)<sub>2</sub>O), 171.8 (CONAr); *Data for minor diastereomer: HPLC Analysis:* Chiralpak AD-H (98:2 hexane:isopropanol, flow rate 2.0 ml·min<sup>−1</sup>, 211 nm, 30 °C) *t*<sub>R</sub> (1'*S*,4*R*)-**28**: 29.4 min, *t*<sub>R</sub> (1'*R*,4*S*)-**28**: 89.2 min, >99:1 er; <sup>1</sup>H NMR (500 MHz, CDCl<sub>3</sub>) (*selected*)  $\delta$ <sub>H</sub>: 1.97 (3H, s, CH<sub>3</sub>), 4.35 (1H, s CHAr), 4.93 (1H, br s, OH), 7.10 (1H, dd, <sup>3</sup>J<sub>HH</sub> = 5.0, <sup>4</sup>J<sub>HH</sub> = 1.4 Hz, CHAr<sup>C4</sup>H), 7.27-7.29 (1H, m, ArCH); <sup>13</sup>C{<sup>1</sup>H} NMR (126 MHz, CDCl<sub>3</sub>)

(selected)  $\delta_c$ : 14.6 (CH<sub>3</sub>), 42.2 (NCH<sub>2</sub>CH<sub>2</sub>), 48.4 (CHAR), 66.3 (NCH<sub>2</sub>CH<sub>2</sub>), 79.8 (C-OH), 118.9 (NArC<sup>2,6</sup>H), 125.2 (ArCH), 126.6 (ArCH), 128.5 (ArCH), 128.9 (NArC<sup>3,5</sup>H), 131.9 (CHARC<sup>3</sup>H), 137.8 (NArC<sup>1</sup>), 160.4 (C=N), 168.8 (CON(CH<sub>2</sub>CH<sub>2</sub>)<sub>2</sub>O), 171.2 (CONAr).

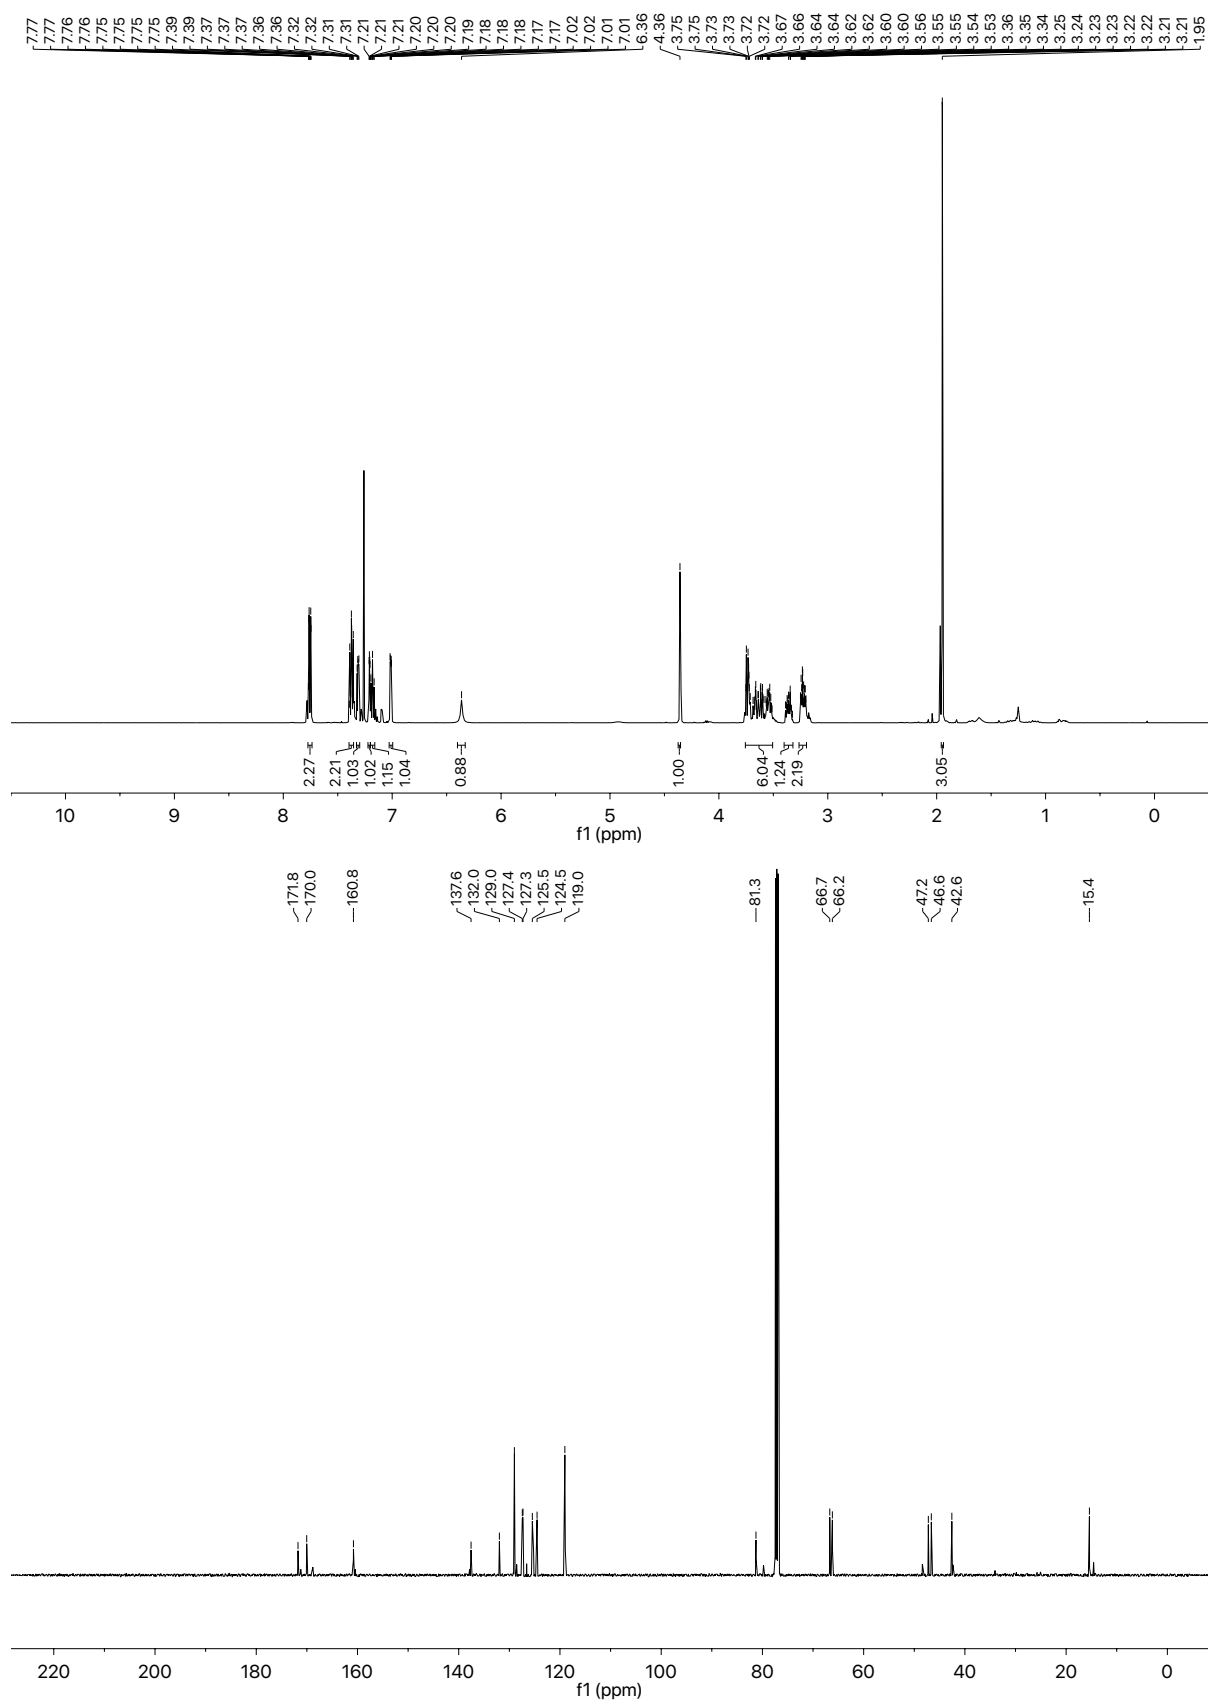

5.14. (2'*R*,4*R*)- and (2'*S*,4*R*)-(*E*)-4-hydroxy-5-methyl-4-(5-methyl-1-morpholino-1-oxohex-3-en-2-yl)-2-phenyl-2,4-dihydro-3*H*-pyrazol-3-one **29**

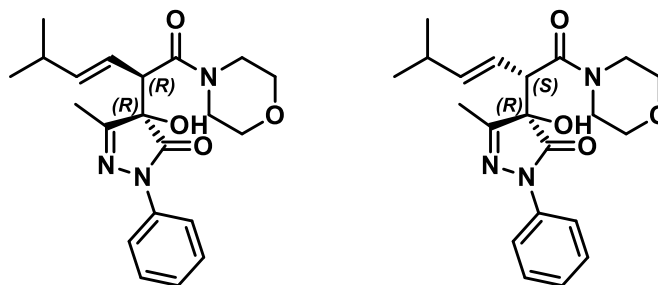

To a solution of 3-methyl-1-phenyl-1*H*-pyrazole-4,5-dione (47.1 mg, 0.25 mmol), (*E*)-5-methylhex-3-enoic anhydride (89.4 mg, 0.375 mmol) and (2*R*,3*S*)-HyperBTM (3.9 mg, 0.125 mmol) were dissolved in ethyl acetate (6 ml, 0.04 M) at 0 °C. Diisopropylethylamine (54 µl, 0.31 mmol) was added and the reaction mixture was stirred at 0 °C for 3 h. Morpholine (66 µl, 0.75 mmol) was added and the reaction mixture was stirred for 16 h at rt. The reaction mixture was diluted with ethyl acetate and washed sequentially with 1 M aq. HCl (×2), sat. aq. NaHCO<sub>3</sub> (×2), and brine (×1). The organic layer was dried over MgSO<sub>4</sub>, filtered, and concentrated *in vacuo*. Purification by column chromatography (*n*-hexane : ethyl acetate 4:1 to 1:1) gave the title compound as white amorphous solid (23.9 mg, 0.06 mmol, 25%, 89:11 d.r.). [ $\alpha$ ]<sub>D</sub><sup>20</sup> +183.8 (c 0.25, CHCl<sub>3</sub>); IR  $\nu_{\max}$  (film) 3296 (O-H), 2961 (C-H), 2926 (C-H), 2866 (C-H), 1719 (C=O, pyrazolone), 1616, 1501, 1366, 1227, 1117, 756; **HRMS** (ESI<sup>+</sup>) C<sub>21</sub>H<sub>27</sub>N<sub>3</sub>O<sub>4</sub>Na [M+Na]<sup>+</sup> found 408.1889, requires 408.1894 (−1.2 ppm). **Data for major diastereomer: HPLC Analysis:** Chiralpak AD-H (85:15 hexane:isopropanol, flow rate 2.0 ml·min<sup>−1</sup>, 211 nm, 30 °C)  $t_R$  (2'*R*,4*R*)-**29**: 4.4 min,  $t_R$  (2'*S*,4*S*)-**29**: 8.7 min, 98:2 er; **<sup>1</sup>H NMR** (500 MHz, CDCl<sub>3</sub>)  $\delta_H$ : 0.87 (3H, d, <sup>3</sup>J<sub>HH</sub> = 6.7 Hz, CH(CH<sub>3</sub>)<sub>A</sub>(CH<sub>3</sub>)<sub>B</sub>), 0.91 (3H, d, <sup>3</sup>J<sub>HH</sub> = 6.7 Hz, CH(CH<sub>3</sub>)<sub>A</sub>(CH<sub>3</sub>)<sub>B</sub>), 2.20-2.30 (4H, m, C<sup>5</sup>CH<sub>3</sub>, CH(CH<sub>3</sub>)<sub>2</sub>), 3.38-3.51 (2H, m, NCH<sub>A</sub>H<sub>B</sub>CH<sub>2</sub>), 3.51-3.79 (7H, m, CHCONR<sub>2</sub>, NCH<sub>C</sub>H<sub>D</sub>CH<sub>2</sub>, N(CH<sub>2</sub>CH<sub>2</sub>)<sub>2</sub>), 5.40 (1H, ddd, <sup>3</sup>J<sub>HH</sub> = 15.5 Hz, 9.2 Hz, <sup>4</sup>J<sub>HH</sub> = 1.3 Hz, HC=CHCH(CH<sub>3</sub>)<sub>2</sub>), 5.63 (1H, dd, <sup>3</sup>J<sub>HH</sub> = 15.5 Hz, 6.7 Hz, HC=CHCH(CH<sub>3</sub>)<sub>2</sub>), 5.69 (1H, br s, OH), 7.17 (1H, t, <sup>3</sup>J<sub>HH</sub> = 7.4 Hz, NArC<sup>4</sup>H), 7.33-7.43 (2H, m, NArC<sup>3,5</sup>H), 7.86 (2H, d, <sup>3</sup>J<sub>HH</sub> = 7.8 Hz, NArC<sup>2,6</sup>H); **<sup>13</sup>C{<sup>1</sup>H} NMR** (126 MHz, CDCl<sub>3</sub>)  $\delta_C$ : 16.0 (C<sup>5</sup>CH<sub>3</sub>), 21.9 (CH(CH<sub>3</sub>)<sub>A</sub>(CH<sub>3</sub>)<sub>B</sub>), 22.2 (CH(CH<sub>3</sub>)<sub>A</sub>(CH<sub>3</sub>)<sub>B</sub>), 31.4 (CH(CH<sub>3</sub>)<sub>2</sub>), 42.5 (NCH<sub>C</sub>H<sub>D</sub>CH<sub>2</sub>), 46.6 (NCH<sub>A</sub>H<sub>B</sub>CH<sub>2</sub>), 49.8 (CHCONR<sub>2</sub>), 66.5 (NCH<sub>2</sub>CH<sub>A</sub>H<sub>B</sub>), 66.9 (NCH<sub>2</sub>CH<sub>C</sub>H<sub>D</sub>), 81.0 (C-OH), 118.3 (HC=CHCH(CH<sub>3</sub>)<sub>2</sub>), 118.8 (NArC<sup>2,6</sup>H), 125.3 (NArC<sup>4</sup>H), 129.0 (NArC<sup>3,5</sup>H), 137.8 (NArC<sup>1</sup>), 146.0 (HC=CHCH(CH<sub>3</sub>)<sub>2</sub>), 160.7 (C=N), 170.1 (CON(CH<sub>2</sub>CH<sub>2</sub>)<sub>2</sub>O), 171.8 (CONAr); **Data for minor diastereomer: HPLC Analysis:** Chiralpak AD-H (85:15 hexane:isopropanol, flow rate 2.0 ml·min<sup>−1</sup>, 211 nm, 30 °C)  $t_R$  (2'*S*,4*R*)-**29**: 4.0 min,  $t_R$  (2'*R*,4*S*)-**29**: 5.8 min, 94.5:5.5 er **<sup>1</sup>H NMR** (500 MHz, CDCl<sub>3</sub>) (*selected*)  $\delta_H$ : 2.18 (3H, s, C<sup>5</sup>CH<sub>3</sub>), 2.35-3.43 (1H, m, CH(CH<sub>3</sub>)<sub>2</sub>).

**Note:** As the dr could not be determined from the crude reaction mixture, the two diastereomers were initially isolated together by column chromatography to yield a crude mixture with 75:25 dr. This was further purified by column chromatography to give the pure product in 89:11 dr.

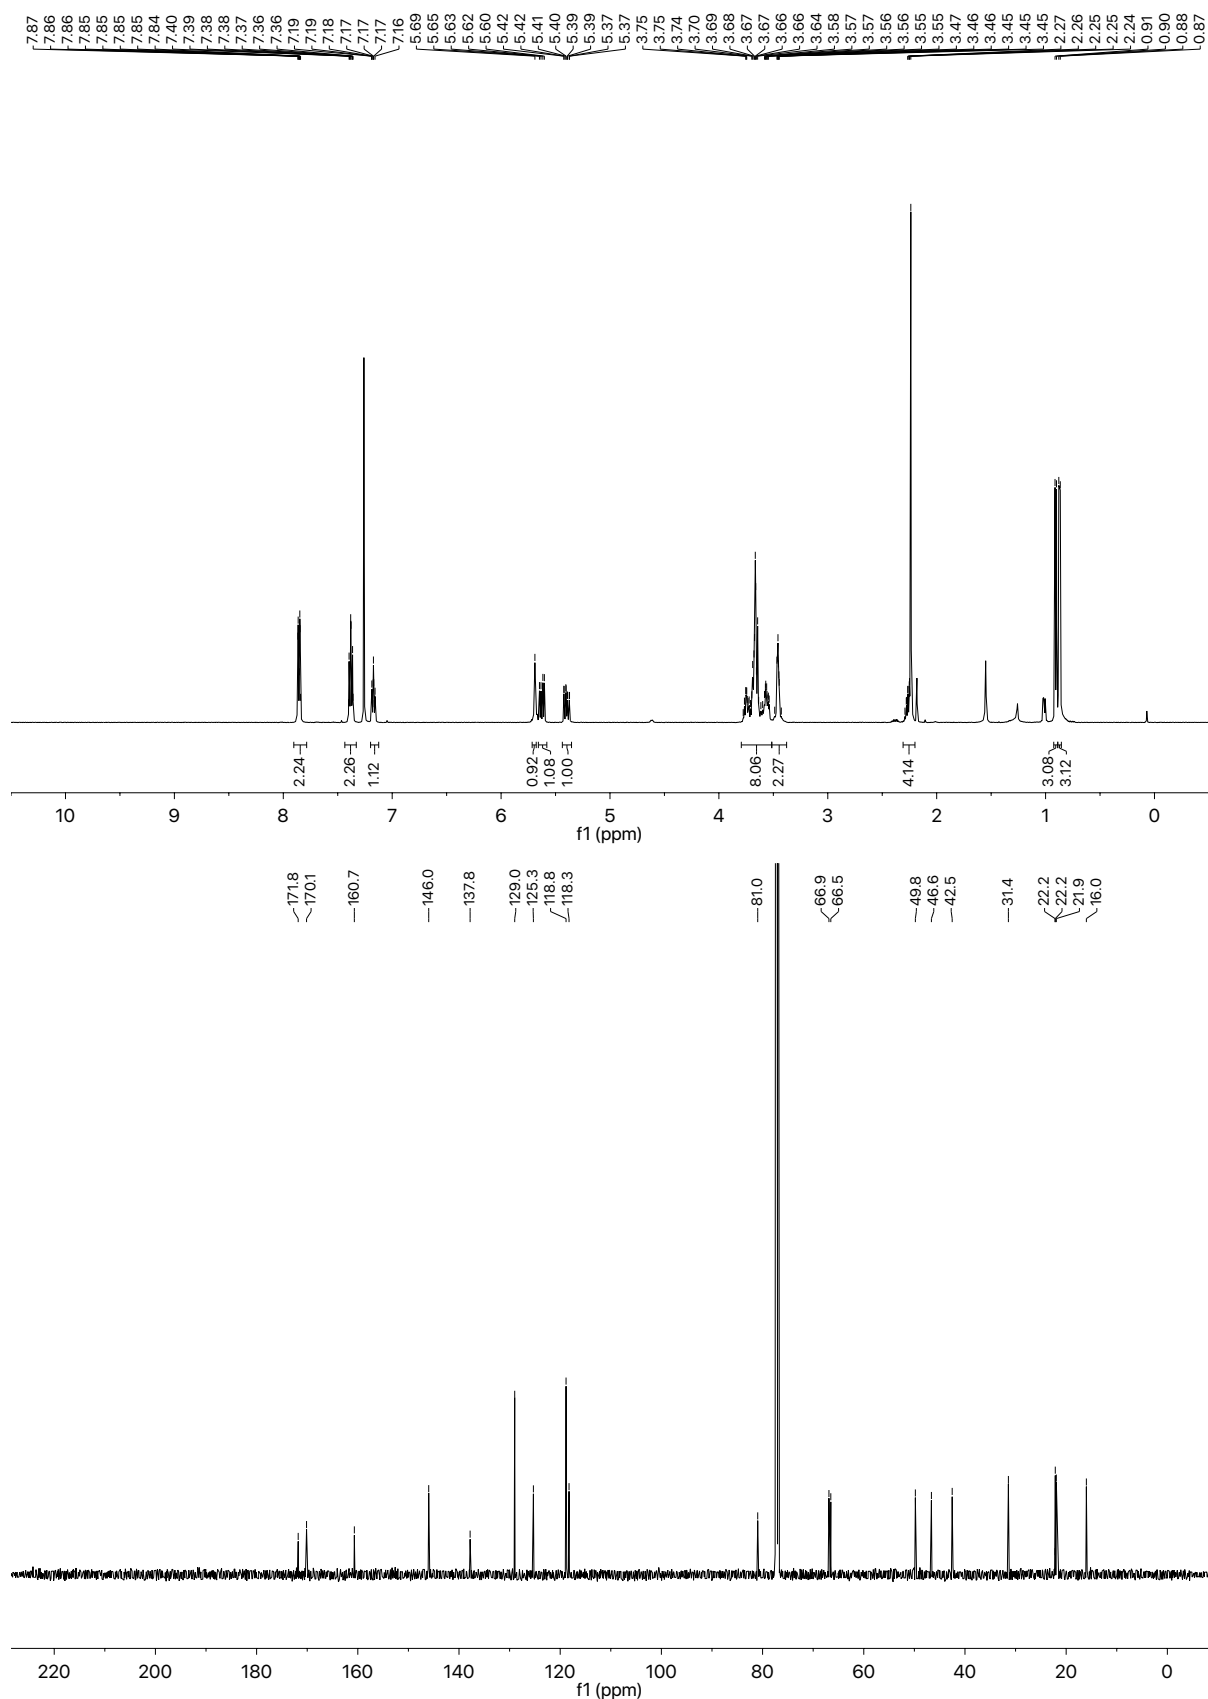

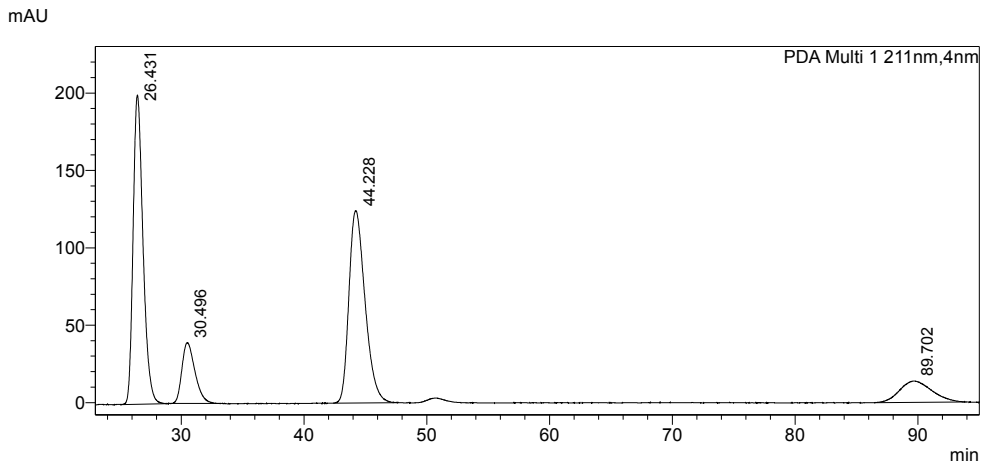

**<Peak Table>**

| PDA Ch1 211nm |           |         |
|---------------|-----------|---------|
| Peak#         | Ret. Time | Area%   |
| 1             | 26.431    | 40.023  |
| 2             | 30.496    | 10.429  |
| 3             | 44.228    | 40.521  |
| 4             | 89.702    | 9.027   |
| Total         |           | 100.000 |

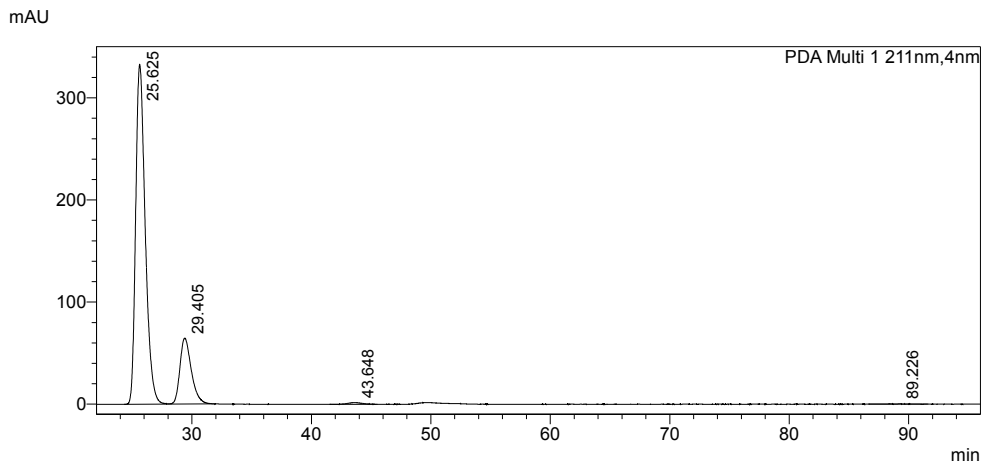

**<Peak Table>**

| PDA Ch1 211nm |           |         |
|---------------|-----------|---------|
| Peak#         | Ret. Time | Area%   |
| 1             | 25.625    | 80.628  |
| 2             | 29.405    | 18.687  |
| 3             | 43.648    | 0.595   |
| 4             | 89.226    | 0.090   |
| Total         |           | 100.000 |



5.15. (1'*R*,4*R*)- and (1'*S*,4*R*)-4-Hydroxy-5-isopropyl-4-(2-morpholino-2-oxo-1-phenylethyl)-2-phenyl-2,4-dihydro-3*H*-pyrazol-3-one **30**

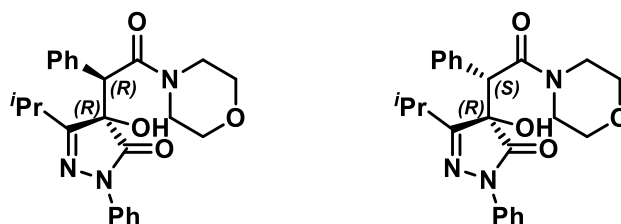

To a solution of 3-isopropyl-1-phenyl-1*H*-pyrazole-4,5-dione (54.1 mg, 0.25 mmol), 2-phenylacetic anhydride (95.4 mg, 0.375 mmol) and (2*R*,3*S*)-HyperBTM (3.9 mg, 0.125 mmol) were dissolved in ethyl acetate (6 ml, 0.04 M) at 0 °C. Diisopropylethylamine (54 μl, 0.31 mmol) was added and the reaction mixture was stirred at 0 °C for 3 h. Morpholine (66 μl, 0.75 mmol) was added and the reaction mixture was stirred for 16 h at rt. The reaction mixture was diluted with ethyl acetate and washed sequentially with 1 M aq. HCl (×2), sat. aq. NaHCO<sub>3</sub> (×2), and brine (×1). The organic layer was dried over MgSO<sub>4</sub>, filtered, and concentrated *in vacuo*. Purification by column chromatography (*n*-hexane : ethyl acetate 4:1 to 1:1) gave the major and minor diastereomer (94.9 mg, 90%, 94:6 dr) as an inseparable mixture as a white amorphous solid.  $[\alpha]_D^{20} +226.6$  (c 1.00, CHCl<sub>3</sub>); **IR**  $\nu_{\max}$  (film) 3360 (O-H), 3063, 2970 (C-H), 2928 (C-H), 2859 (C-H), 1717 (C=O, pyrazolone), 1643, 1622, 1597, 1493, 1348, 1225, 1113, 972, 864, 756; **HRMS** (ESI<sup>+</sup>) C<sub>24</sub>H<sub>27</sub>N<sub>3</sub>O<sub>4</sub>Na [M+Na]<sup>+</sup> found 444.1883, requires 444.1894 (−2.4 ppm). *Data for major diastereomer: HPLC Analysis:* Chiralpak AD-H (95:5 hexane:isopropanol, flow rate 2.00 ml·min<sup>−1</sup>, 211 nm, 30 °C)  $t_R$  (1'*R*,4*R*)-**30**: 16.3 min,  $t_R$  (1'*S*,4*S*)-**30**: 31.3 min, >99:1 er; **<sup>1</sup>H NMR** (500 MHz, CDCl<sub>3</sub>)  $\delta_H$ : 1.04 (3H, d, <sup>3</sup> $J_{HH}$  = 6.8 Hz, CH(CH<sub>3</sub>)<sub>A</sub>(CH<sub>3</sub>)<sub>B</sub>), 1.26 (3H, d, <sup>3</sup> $J_{HH}$  = 6.8 Hz, CH(CH<sub>3</sub>)<sub>A</sub>(CH<sub>3</sub>)<sub>B</sub>), 2.67 (1H, hept, <sup>3</sup> $J_{HH}$  = 6.8 Hz, CH(CH<sub>3</sub>)<sub>2</sub>), 3.07-3.22 (2H, m, NCH<sub>A</sub>H<sub>B</sub>CH<sub>2</sub> + NCH<sub>2</sub>CH<sub>A</sub>H<sub>B</sub>), 3.34 (1H, ddd, <sup>2</sup> $J_{HH}$  = 14.5 Hz, <sup>3</sup> $J_{HH}$  = 7.6 Hz, 3.0 Hz, NCH<sub>A</sub>H<sub>B</sub>CH<sub>2</sub>), 3.50 (1H, ddd, <sup>2</sup> $J_{HH}$  = 11.5 Hz, <sup>3</sup> $J_{HH}$  = 6.6 Hz, 3.0 Hz, NCH<sub>2</sub>CH<sub>A</sub>H<sub>B</sub>), 3.59 (1H, ddd, <sup>2</sup> $J_{HH}$  = 11.2 Hz, <sup>3</sup> $J_{HH}$  = 6.9 Hz, 2.5 Hz, NCH<sub>2</sub>CH<sub>C</sub>H<sub>D</sub>), 3.66 (1H, ddd, <sup>2</sup> $J_{HH}$  = 12.1 Hz, <sup>3</sup> $J_{HH}$  = 6.9 Hz, 2.3 Hz, NCH<sub>C</sub>H<sub>D</sub>CH<sub>2</sub>), 3.70-3.81 (2H, m, NCH<sub>C</sub>H<sub>D</sub>CH<sub>2</sub> + NCH<sub>2</sub>CH<sub>C</sub>H<sub>D</sub>), 4.22 (1H, s, CHAr), 6.21 (1H, br s, OH), 7.19 (1H, tt, <sup>3</sup> $J_{HH}$  = 7.5 Hz, <sup>4</sup> $J_{HH}$  = 1.2 Hz, NArC<sup>4</sup>H), 7.26-7.36 (5H, m, CHArC<sup>2,3,4,5,6</sup>H), 7.38 (2H, app t, <sup>3</sup> $J_{HH}$  = 7.9 Hz, NArC<sup>3,5</sup>H), 7.78 (2H, d, <sup>3</sup> $J_{HH}$  = 7.9 Hz, NArC<sup>2,6</sup>H); **<sup>13</sup>C{<sup>1</sup>H} NMR** (126 MHz, CDCl<sub>3</sub>)  $\delta_C$ : 19.1 (CH(CH<sub>3</sub>)<sub>A</sub>(CH<sub>3</sub>)<sub>B</sub>), 22.9 (CH(CH<sub>3</sub>)<sub>A</sub>(CH<sub>3</sub>)<sub>B</sub>), 29.5 (CH(CH<sub>3</sub>)<sub>2</sub>), 42.5 (NCH<sub>C</sub>H<sub>D</sub>CH<sub>2</sub>), 46.5 (NCH<sub>A</sub>H<sub>B</sub>CH<sub>2</sub>), 53.0 (CHAr), 66.0 (NCH<sub>2</sub>CH<sub>A</sub>H<sub>B</sub>), 66.6 (NCH<sub>2</sub>CH<sub>C</sub>H<sub>D</sub>), 82.6 (C(4)-OH), 119.1 (NArC<sup>2,6</sup>H), 125.2 (NArC<sup>4</sup>H), 128.8 (CHArC<sup>2,6</sup>H), 128.9 (NArC<sup>3,5</sup>H), 129.0 (CHArC<sup>4</sup>H), 129.2 (CHArC<sup>3,5</sup>H), 132.1 (CHArC<sup>1</sup>), 137.8 (NArC<sup>1</sup>), 167.5 (C=N), 170.3 (COO), 171.8 (CONAr); *Data for minor diastereomer: HPLC Analysis:* Chiralpak AD-H (95:5 hexane:isopropanol, flow rate 2.00 ml·min<sup>−1</sup>, 211 nm, 30 °C)  $t_R$  (1'*S*,4*R*)-**30**: 21.6 min,  $t_R$  (1'*R*,4*S*)-**30**: 43.7 min (not detected); **<sup>1</sup>H**

**NMR** (500 MHz, CDCl<sub>3</sub>) (*selected*)  $\delta_{\text{H}}$ : 1.12 (3H, d,  $^3J_{\text{HH}} = 6.9$  Hz, CH(CH<sub>3</sub>)<sub>A</sub>(CH<sub>3</sub>)<sub>B</sub>), 1.35 (3H, d,  $^3J_{\text{HH}} = 6.9$  Hz, CH(CH<sub>3</sub>)<sub>A</sub>(CH<sub>3</sub>)<sub>B</sub>), 3.04 (1H, ddd,  $^2J_{\text{HH}} = 10.8$  Hz,  $^3J_{\text{HH}} = 7.2$  Hz, 2.6 Hz, NCH<sub>2</sub>CH<sub>A</sub>H<sub>B</sub>), 4.18 (1H, s, CHAr), 5.42 (1H, br s, OH), 7.14 (1H, t,  $^3J_{\text{HH}} = 7.5$  Hz,  $^4J_{\text{HH}} = 1.1$  Hz, NArC(4)H), 7.74 (2H, d,  $^3J_{\text{HH}} = 7.8$  Hz, NArC<sup>2,6</sup>H); **<sup>13</sup>C{<sup>1</sup>H}** **NMR** (126 MHz, CDCl<sub>3</sub>) (*selected*)  $\delta_{\text{C}}$ : 19.8 CH(CH<sub>3</sub>)<sub>A</sub>(CH<sub>3</sub>)<sub>B</sub>, 21.8 CH(CH<sub>3</sub>)<sub>A</sub>(CH<sub>3</sub>)<sub>B</sub>, 29.0 CH(CH<sub>3</sub>)<sub>2</sub>, 42.3 (NCH<sub>2</sub>CH<sub>2</sub>), 53.1 (CHAr), 81.5 (C-OH), 118.9 (NArC<sup>2,6</sup>H), 125.0 (NArC<sup>4</sup>H), 129.6 (ArCH), 132.0 (CHArC<sup>1</sup>), 137.9 (NArC<sup>1</sup>), 166.7 (C=N), 169.3 (COO), 171.3 (CONAr).

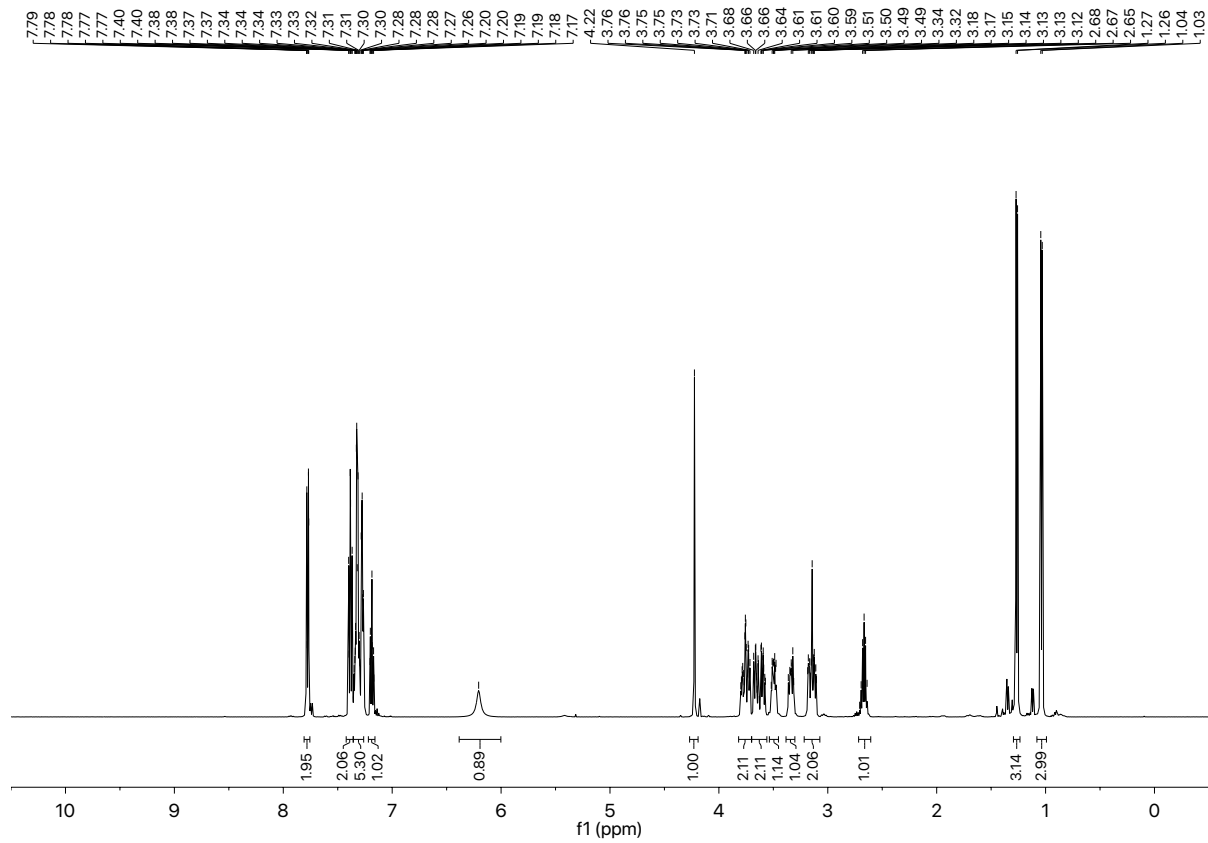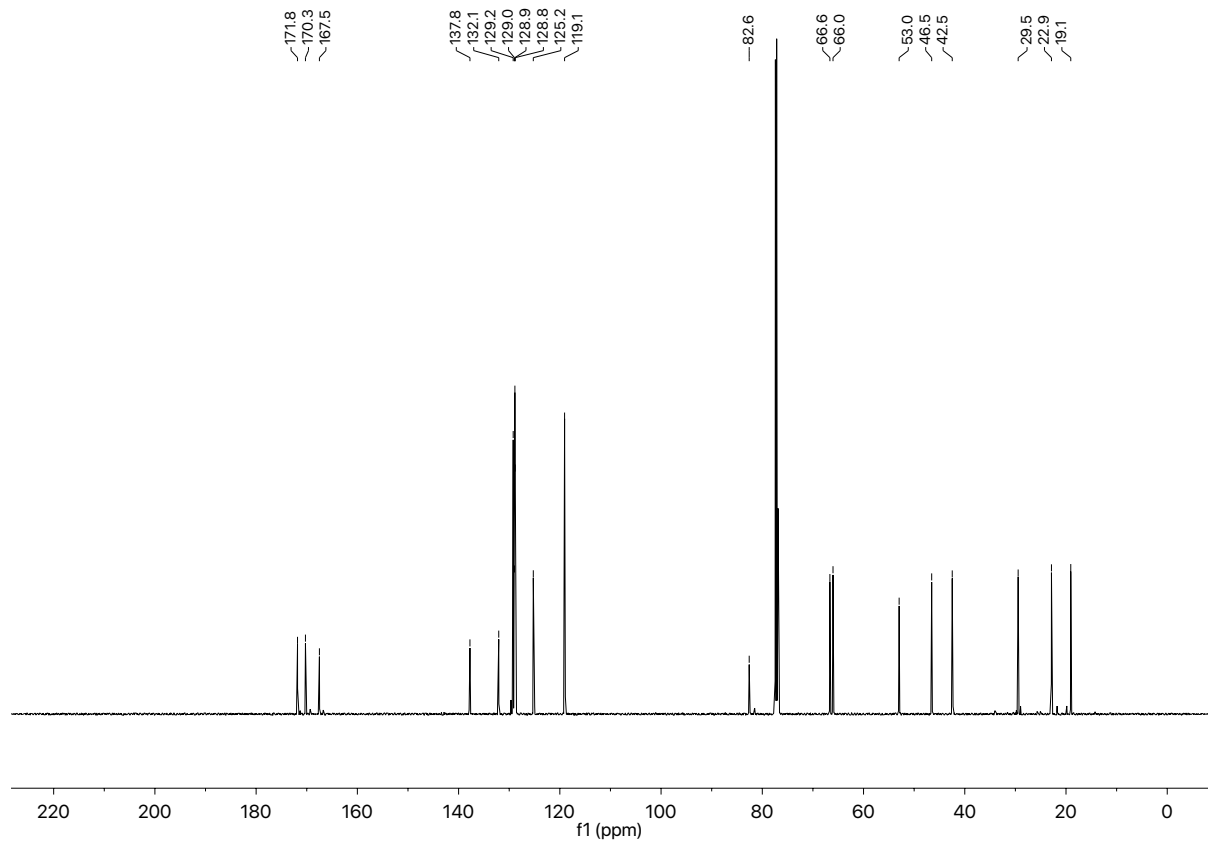

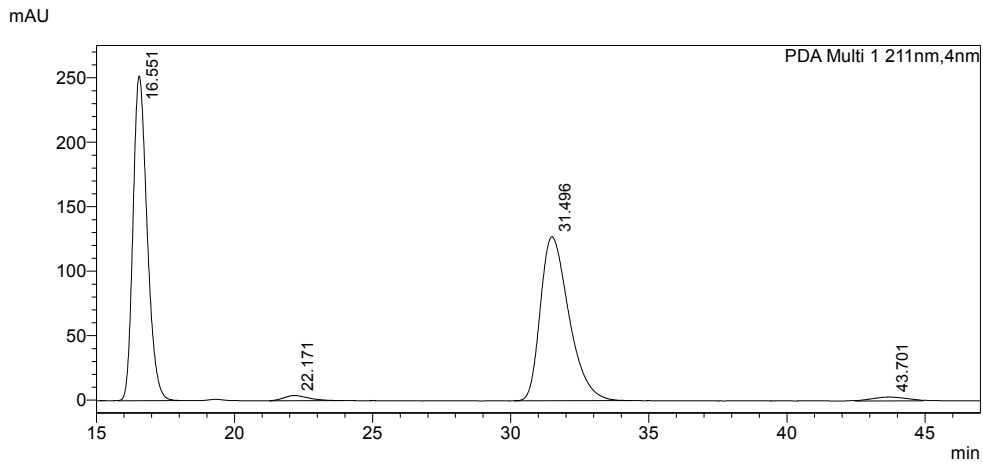

**<Peak Table>**

| PDA Ch1 211nm |           |         |
|---------------|-----------|---------|
| Peak#         | Ret. Time | Area%   |
| 1             | 16.551    | 48.026  |
| 2             | 22.171    | 1.345   |
| 3             | 31.496    | 49.196  |
| 4             | 43.701    | 1.434   |
| Total         |           | 100.000 |

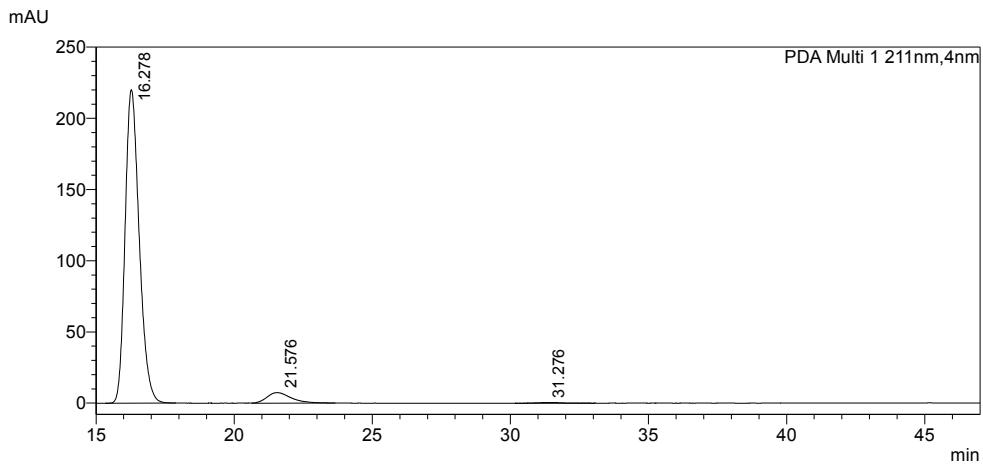

**<Peak Table>**

| PDA Ch1 211nm |           |         |
|---------------|-----------|---------|
| Peak#         | Ret. Time | Area%   |
| 1             | 16.278    | 94.138  |
| 2             | 21.576    | 5.461   |
| 3             | 31.276    | 0.401   |
| Total         |           | 100.000 |

5.16. (1'*R*,4*R*)- and (1'*S*,4*R*)-4-Hydroxy-5-isopropyl-4-(2-morpholino-1-(naphth-1-yl)-2-oxoethyl)-2-phenyl-2,4-dihydro-3*H*-pyrazol-3-one **31**

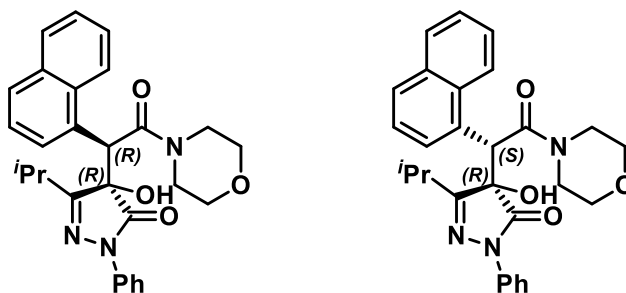

To a solution of 3-isopropyl-1-phenyl-1*H*-pyrazole-4,5-dione (54.1 mg, 0.25 mmol), 2-(naphtha-1-yl)acetic anhydride (132.9 mg, 0.375 mmol) and (2*R*,3*S*)-HyperBTM (3.9 mg, 0.125 mmol) were dissolved in ethyl acetate (6 ml, 0.04 M) at 0 °C. Diisopropylethylamine (54 µl, 0.31 mmol) was added and the reaction mixture was stirred at 0 °C for 3 h. Morpholine (66 µl, 0.75 mmol) was added and the reaction mixture was stirred for 16 h at rt. The reaction mixture was diluted with ethyl acetate and washed sequentially with 1 M aq. HCl (×2), sat. aq. NaHCO<sub>3</sub> (×2), and brine (×1). The organic layer was dried over MgSO<sub>4</sub>, filtered, and concentrated *in vacuo*. Purification by column chromatography (*n*-hexane : ethyl acetate 4:1 to 1:1) gave the major and minor diastereomer (112.5 mg, 96%, >95:5 dr) as an inseparable mixture as a white amorphous solid.  $[\alpha]_D^{20} +286.5$  (c 1.00, CHCl<sub>3</sub>); IR  $\nu_{\max}$  (film) 3319 (O-H), 3061, 2970, 2928, 2859, 1717 (C=O, pyrazolone), 1645, 1628, 1597, 1491, 1435, 1346, 1223, 1113, 791, 781; HRMS (ESI<sup>+</sup>) C<sub>28</sub>H<sub>30</sub>N<sub>3</sub>O<sub>4</sub> [M+H]<sup>+</sup> found 472.2219, requires 472.22309 (−2.5 ppm). *Data for major diastereomer anti-31*: HPLC Analysis: Chiralpak AD-H (85:15 hexane:isoproanol, flow rate 2.00 ml·min<sup>−1</sup>, 211 nm, 30 °C)  $t_R$  (1'*R*,4*R*)-**31**: 6.5 min,  $t_R$  (1'*S*,4*S*)-**31**: 31.5 min, >99:1 er; <sup>1</sup>H NMR (500 MHz, CDCl<sub>3</sub>)  $\delta_H$ : 0.65 (3H, d,  $J_{HH}$  6.6, C(5)CH(CH<sub>3</sub>)<sup>A</sup>(CH<sub>3</sub>)<sup>B</sup>), 1.11 (3H, d,  $J_{HH}$  6.8, C(5)CH(CH<sub>3</sub>)<sup>A</sup>(CH<sub>3</sub>)<sup>B</sup>), 1.97 (1H, app br s, C(5)CH(CH<sub>3</sub>)<sub>2</sub>), 2.76 (1H, ddd,  $J_{HH}$  10.6, 7.2, 3.0, NCH<sub>2</sub>CH<sup>A</sup>H<sup>B</sup>), 2.94 (1H, ddd,  $J_{HH}$  13.5, 5.8, 3.0, NCH<sup>A</sup>H<sup>B</sup>CH<sub>2</sub>), 3.18-3.32 (2H, m, NCH<sup>A</sup>H<sup>B</sup>CH<sub>2</sub> + NCH<sub>2</sub>CH<sup>A</sup>H<sup>B</sup>), 3.48 (1H, ddd,  $J_{HH}$  11.5, 7.4, 3.0, NCH<sub>2</sub>CH<sup>C</sup>H<sup>D</sup>), 3.57 (1H, ddd,  $J_{HH}$  13.3, 7.4, 3.0, NCH<sup>C</sup>H<sup>D</sup>CH<sub>2</sub>), 3.67 (1H, ddd,  $J_{HH}$  11.5, 5.8, 3.0, NCH<sub>2</sub>CH<sup>C</sup>H<sup>D</sup>), 3.79 (1H, ddd,  $J_{HH}$  13.3, 5.8, 3.0, NCH<sup>C</sup>H<sup>D</sup>CH<sub>2</sub>), 4.95 (1H, s, C(1')H), 6.88 (1H, br s, OH), 7.14 (1H, t,  $J_{HH}$  7.4, NArC(4)H), 7.34 (2H, app t,  $J_{HH}$  8.0, NArC(3,5)H), 7.45-7.58 (3H, m, C(1')HArC(3)H + C(1')HArC(7)H + C(1')HArC(6)H), 7.74 (2H, d,  $J_{HH}$  7.8, NArC(2,6)H), 7.81 (1H, d,  $J_{HH}$  7.3, C(1')HArC(2)H), 7.88 (2H, app d,  $J_{HH}$  8.1, C(1')HArC(4)H + C(1')HArC(8)H), 7.95 (1H, d,  $J_{HH}$  8.6, C(1')HArC(5)H); <sup>13</sup>C{<sup>1</sup>H} NMR (126 MHz, CDCl<sub>3</sub>)  $\delta_C$ : 18.7 (C(5)CH(CH<sub>3</sub>)<sup>A</sup>(CH<sub>3</sub>)<sup>B</sup>), 22.9 (C(5)CH(CH<sub>3</sub>)<sup>A</sup>(CH<sub>3</sub>)<sup>B</sup>), 29.5 (C(5)CH(CH<sub>3</sub>)<sub>2</sub>), 42.7 (NCH<sup>C</sup>H<sup>D</sup>CH<sub>2</sub>), 45.5 (C(1')H), 46.2 (NCH<sup>A</sup>H<sup>B</sup>CH<sub>2</sub>), 65.9 (NCH<sub>2</sub>CH<sup>A</sup>H<sup>B</sup>), 66.5 (NCH<sub>2</sub>CH<sup>C</sup>H<sup>D</sup>), 82.1 (C(4)-OH), 118.9 (NArC(2,6)H), 121.2

(C(1')HArC(5)H), 125.1 (NArC(4)H), 126.3 (C(1')HArC(7)H), 127.6 (C(1')HArC(3)H), 127.8 (C(1')HArC(6)H), 128.1 (C(1')HArC(2)H), 128.8 (NArC(3,5)H), 129.7 (C(1')HArC(4)H), 129.8 (C(1')HArC(8)H), 130.8 (ArC), 134.0 (ArC), 138.0 (NArC(1)), 167.4 (C(5)=N), 170.9 (C(2')=O), 172.9 (C(3)=O); *Data for minor diastereomer syn-31: HPLC Analysis:* Chiralpak AD-H (85:15 hexane:isopropanol, flow rate 2.00 ml·min<sup>-1</sup>, 211 nm, 30 °C) t<sub>R</sub> (1'S,4R)-**31**: 9.4 min, t<sub>R</sub> (1'R,4S)-**103**: 14.5 min (not detected); **<sup>1</sup>H NMR** (500 MHz, CDCl<sub>3</sub>) (*selected*) δ<sub>H</sub>: 1.20 (3H, d, J<sub>HH</sub> 6.9, C(5)CH(CH<sub>3</sub>)<sup>A</sup>(CH<sub>3</sub>)<sup>B</sup>), 1.36 (3H, d, J<sub>HH</sub> 6.7, C(5)CH(CH<sub>3</sub>)<sup>A</sup>(CH<sub>3</sub>)<sup>B</sup>), 2.86 (1H, ddd, J<sub>HH</sub> 12.9, 5.2, 2.2, NCH<sub>2</sub>CH<sub>2</sub>), 4.81 (1H, s, C(1')H), 6.27 (1H, br s, OH); **<sup>13</sup>C{<sup>1</sup>H} NMR** (126 MHz, CDCl<sub>3</sub>) (*selected*) δ<sub>C</sub>: 20.4 (C(5)CH(CH<sub>3</sub>)<sup>A</sup>(CH<sub>3</sub>)<sup>B</sup>), 22.2 (C(5)CH(CH<sub>3</sub>)<sup>A</sup>(CH<sub>3</sub>)<sup>B</sup>).

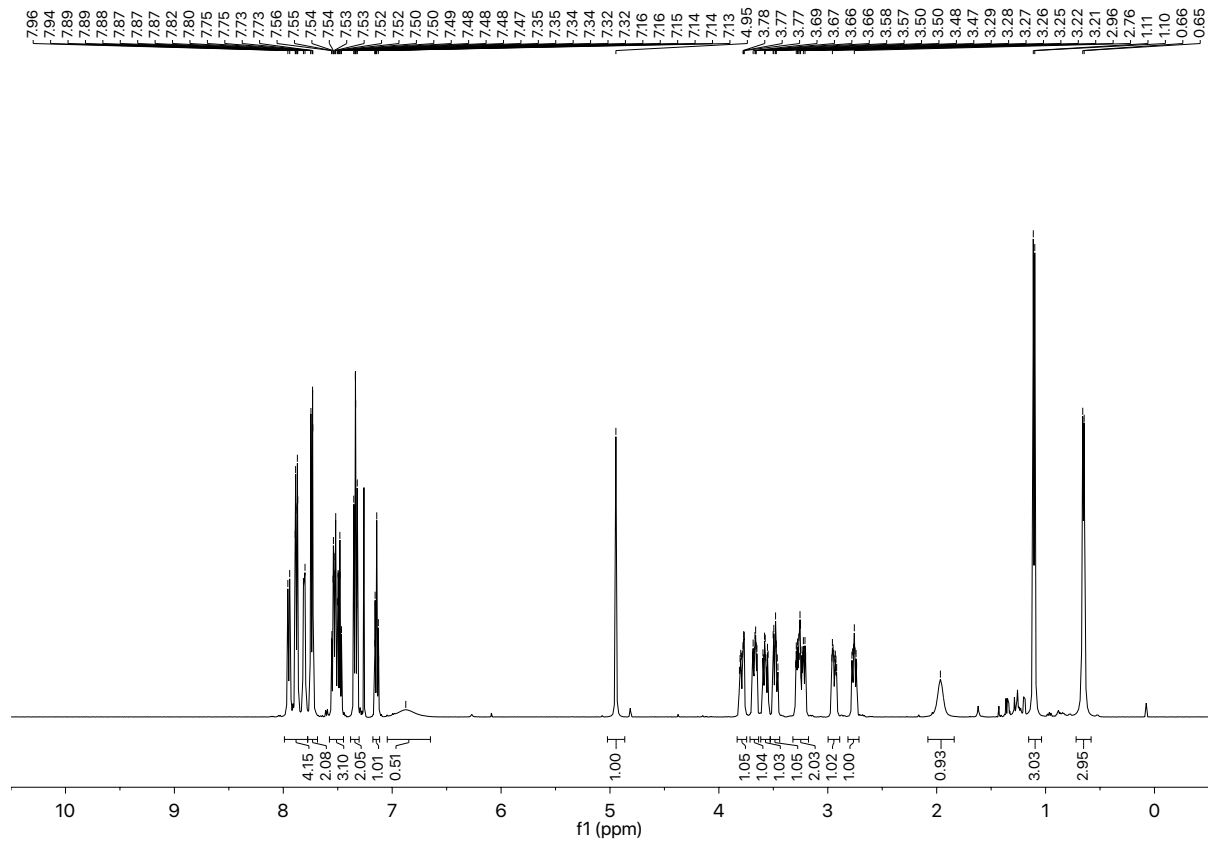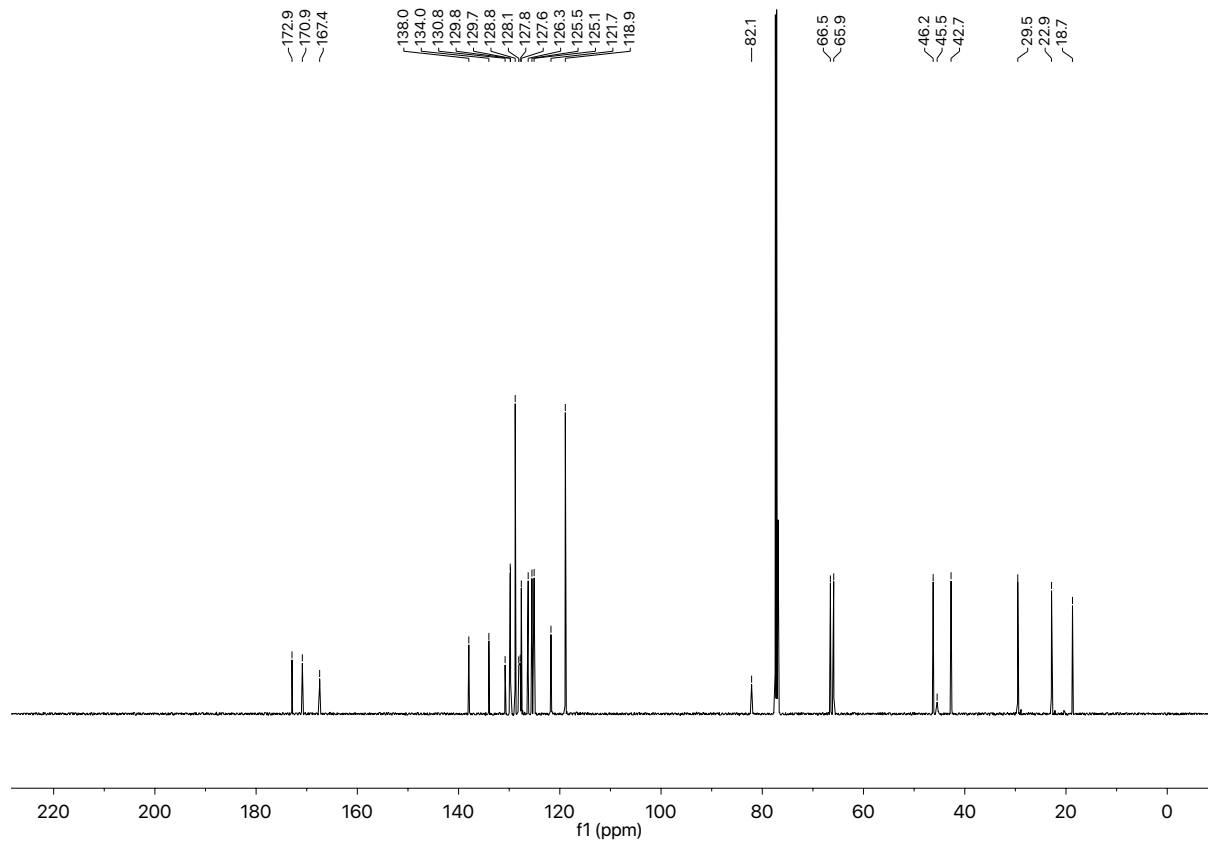

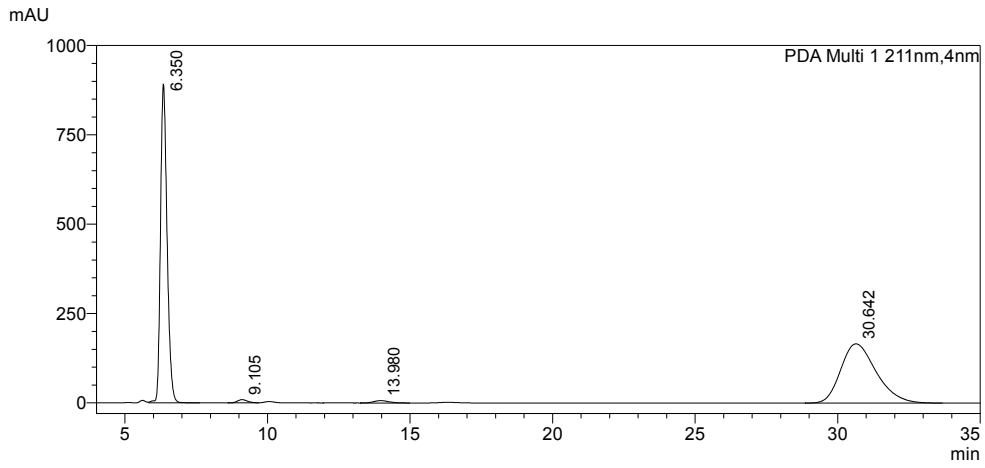

**<Peak Table>**

PDA Ch1 211nm

| Peak# | Ret. Time | Area%   |
|-------|-----------|---------|
| 1     | 6.350     | 49.030  |
| 2     | 9.105     | 0.790   |
| 3     | 13.980    | 0.824   |
| 4     | 30.642    | 49.356  |
| Total |           | 100.000 |

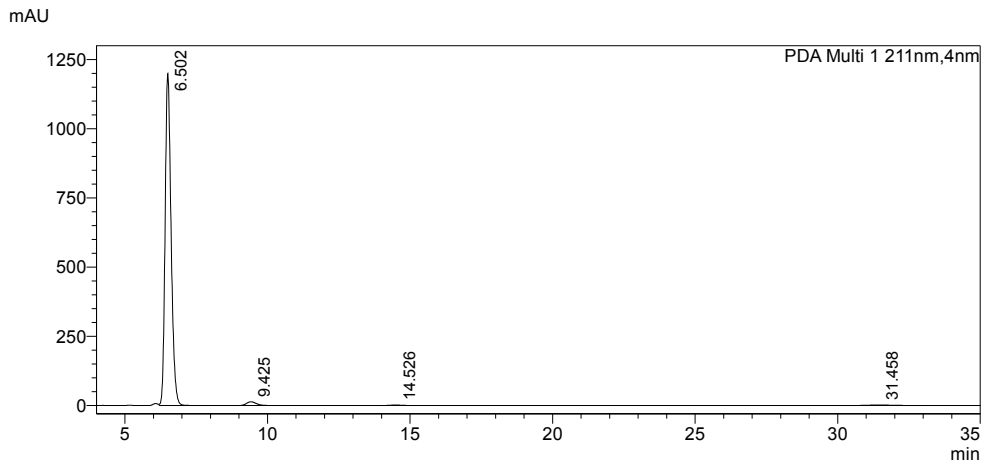

**<Peak Table>**

PDA Ch1 211nm

| Peak# | Ret. Time | Area%   |
|-------|-----------|---------|
| 1     | 6.502     | 97.071  |
| 2     | 9.425     | 1.847   |
| 3     | 14.526    | 0.328   |
| 4     | 31.458    | 0.754   |
| Total |           | 100.000 |



5.17. (1'*R*,4*R*)- and (1'*S*,4*R*)-4-Hydroxy-4-(2-morpholino-2-oxo-1-phenylethyl)-2,5-diphenyl-2,4-dihydro-3*H*-pyrazol-3-one **32**

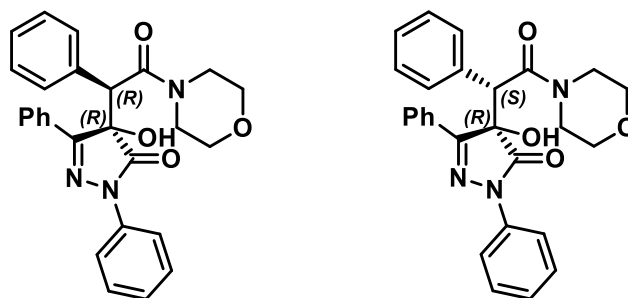

To a solution of 1,3-diphenyl-1*H*-pyrazole-4,5-dione (62.6 mg, 0.25 mmol), 2-phenylacetic anhydride (95.4 mg, 0.375 mmol) and (2*R*,3*S*)-HyperBTM (3.9 mg, 0.125 mmol) were dissolved in ethyl acetate (6 ml, 0.04 M) at 0 °C. Diisopropylethylamine (54  $\mu$ l, 0.31 mmol) was added and the reaction mixture was stirred at 0 °C for 3 h. Morpholine (66  $\mu$ l, 0.75 mmol) was added and the reaction mixture was stirred for 16 h at rt. The reaction mixture was diluted with ethyl acetate and washed sequentially with 1 M aq. HCl ( $\times$ 2), sat. aq. NaHCO<sub>3</sub> ( $\times$ 2), and brine ( $\times$ 1). The organic layer was dried over MgSO<sub>4</sub>, filtered, and concentrated *in vacuo*. Purification by column chromatography (*n*-hexane : ethyl acetate 4:1 to 1:1) gave the major and minor diastereomer (83.0 mg, 73%, 88:12 dr) as an inseparable mixture as a pale yellow amorphous solid.  $[\alpha]_D^{20} +205.1$  (c 0.75, CHCl<sub>3</sub>); IR  $\nu_{\max}$  (film) 3316 (O-H), 3061, 2967 (C-H), 2922 (C-H), 2857 (C-H), 1724 (C=O, pyrazolone), 1639, 1597, 1493, 1111, 752; HRMS (ESI<sup>+</sup>) C<sub>27</sub>H<sub>24</sub>N<sub>3</sub>O<sub>4</sub>Na [M+Na]<sup>+</sup> found 478.17267, requires 478.17373 (−2.2 ppm). **Data for major diastereomer anti-32: HPLC Analysis:** Chiralpak AD-H (95:5 hexane:isopropanol, flow rate 2.00 ml·min<sup>−1</sup>, 211 nm, 30 °C)  $t_R$  (1'*R*,4*R*)-**32**: 17.7 min,  $t_R$  (1'*S*,4*S*)-**32**: 19.2 min, 96.5:3.5 er; <sup>1</sup>H NMR (500 MHz, CDCl<sub>3</sub>)  $\delta_H$ : 2.97-3.03 (1H, m, NCH<sub>2</sub>CH<sup>A</sup>H<sup>B</sup>), 3.06 (1H, ddd,  $J_{HH}$  13.9, 6.4, 2.8, NCH<sup>A</sup>H<sup>B</sup>CH<sub>2</sub>), 3.10-3.20 (2H, m, NCH<sup>A</sup>H<sup>B</sup>CH<sub>2</sub> + NCH<sub>2</sub>CH<sup>A</sup>H<sup>B</sup>), 3.44-3.51 (1H, m, NCH<sup>C</sup>H<sup>D</sup>CH<sub>2</sub>), 3.51-3.61 (3H, m, NCH<sup>C</sup>H<sup>D</sup>CH<sub>2</sub> + NCH<sub>2</sub>CH<sup>C</sup>H<sup>D</sup> + NCH<sub>2</sub>CH<sup>C</sup>H<sup>D</sup>), 4.17 (1H, s, C(1')H), 5.82 (1H, br s, OH), 7.17-7.25 (6H, m, C(5)ArC(3,5)H + C(5)ArC(4)H + C(1')HArC(2,6)H + NArC(4)H), 7.27-7.34 (3H, m, C(1')HArC(3,5)H + C(1')HArC(4)H), 7.43 (2H, app t,  $J_{HH}$  7.8, NArC(3,5)H), 7.77 (2H, d,  $J_{HH}$  7.4, C(5)ArC(2,6)H), 8.0 (2H, d,  $J_{HH}$  8.0, NArC(2,6)H); <sup>13</sup>C{<sup>1</sup>H} NMR (126 MHz, CDCl<sub>3</sub>)  $\delta_C$ : 42.5 (NCH<sup>C</sup>H<sup>D</sup>CH<sub>2</sub>), 46.4 (NCH<sup>A</sup>H<sup>B</sup>CH<sub>2</sub>), 52.8 (C(1')H), 66.1 (NCH<sub>2</sub>CH<sup>A</sup>H<sup>B</sup>), 66.6 (NCH<sub>2</sub>CH<sup>C</sup>H<sup>D</sup>), 80.5 (C(4)-OH), 119.1 (NArC(2,6)H), 125.4 (C(1')HArC(2,6)H), 127.2 (C(5)ArC(2,6)H), 128.3 (ArCH), 128.6 (ArCH), 128.8 (ArCH), 129.0 (NArC(3,5)H), 130.0 (C(1')HArC(4)H), 130.4 (C(1')HArC(2,5)H), 131.0 (ArC), 131.0 (ArC), 138.1 (NArC(1)), 156.7 (C(5)=N), 168.8 (C(2')=O) 172.7 (C(3)=O); **Data for minor diastereomer syn-32: HPLC Analysis:** Chiralpak AD-H (95:5 hexane:isopropanol, flow rate 2.00 ml·min<sup>−1</sup>, 211 nm, 30 °C)  $t_R$  (1'*S*,4*R*)-**32**: 41.3 min,  $t_R$  (1'*R*,4*S*)-**32**: 46.8 min, 97:3 er; <sup>1</sup>H NMR (500 MHz, CDCl<sub>3</sub>) (selected)  $\delta_H$ : 2.87 (1H, ddd,  $J_{HH}$  10.8, 7.6, 2.8, NCH<sub>2</sub>CH<sub>2</sub>), 2.91-2.91 (1H, m,

NCH<sub>2</sub>CH<sub>2</sub>), 3.28 (1H, ddd, *J*<sub>HH</sub> 11.6, 5.6, 3.1, NCH<sub>2</sub>CH<sub>2</sub>), 3.75-3.85 (2H, m, NCH<sub>2</sub>CH<sub>2</sub>), 4.33 (1H, s, C(1')H), 6.34 (1H, br s, OH), 7.02-7.06 (2H, m, ArH), 7.57 (2H, d, *J*<sub>HH</sub> 8.1, C(5)ArC(2,6)H); <sup>13</sup>C{<sup>1</sup>H} NMR (126 MHz, CDCl<sub>3</sub>) (selected) δ<sub>C</sub>: 42.34 (NCH<sub>2</sub>CH<sub>2</sub>), 53.7 (C(1')H), 65.7 (NCH<sub>2</sub>CH<sub>2</sub>), 82.0 (C(4)-OH), 119.4 (NArC(2,6)H), 127.4 (ArCH), 129.4 (ArCH), 131.8 (ArC), 137.4 (NArC(1)), 155.7 (C(5)=N), 169.3 (C(2')=O), 171.8 (C(3)=O).

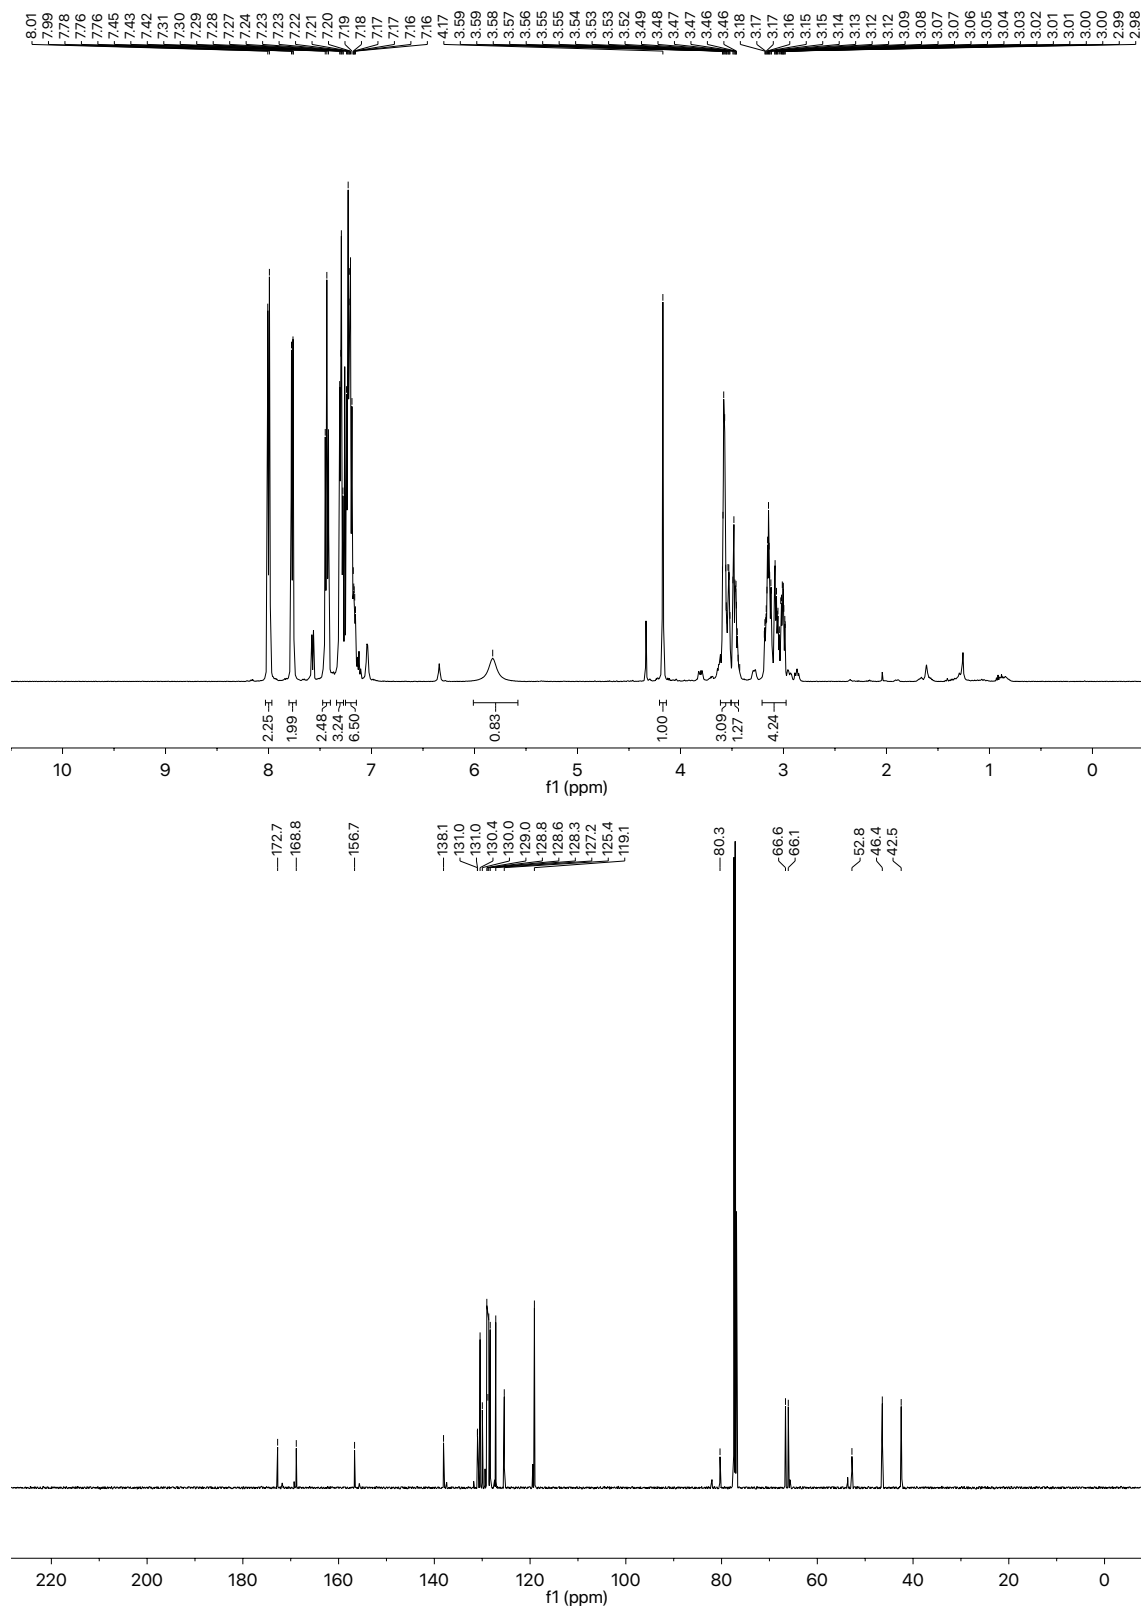

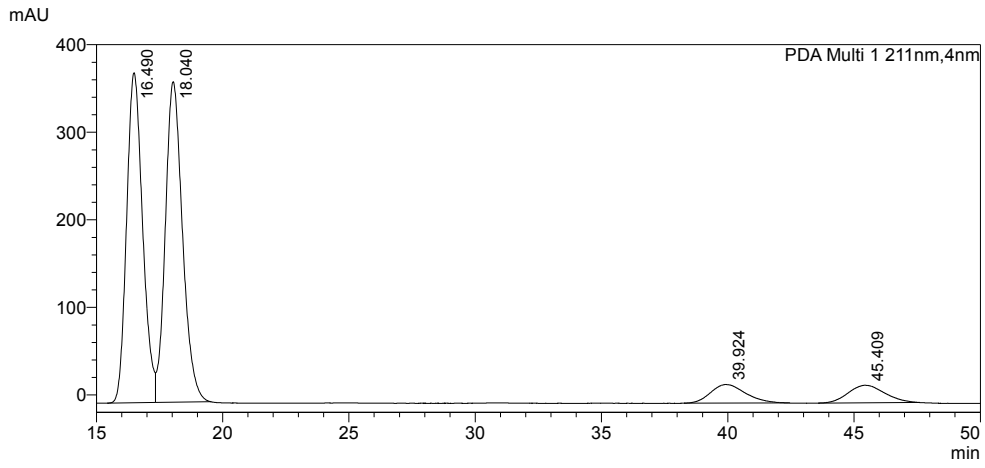

**<Peak Table>**

| PDA Ch1 211nm |           |         |
|---------------|-----------|---------|
| Peak#         | Ret. Time | Area%   |
| 1             | 16.490    | 43.738  |
| 2             | 18.040    | 45.586  |
| 3             | 39.924    | 5.385   |
| 4             | 45.409    | 5.291   |
| Total         |           | 100.000 |

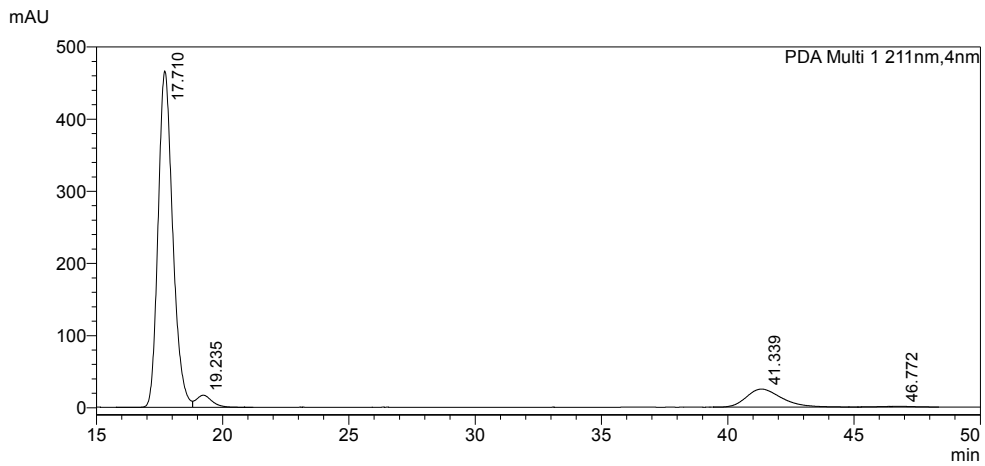

**<Peak Table>**

| PDA Ch1 211nm |           |         |
|---------------|-----------|---------|
| Peak#         | Ret. Time | Area%   |
| 1             | 17.710    | 85.275  |
| 2             | 19.235    | 3.350   |
| 3             | 41.339    | 11.008  |
| 4             | 46.772    | 0.368   |
| Total         |           | 100.000 |

5.18. (1'*R*,4*R*)- and (1'*S*,4*R*)-4-Hydroxy-4-(2-morpholino-1-(naphtha-1-yl)-2-oxoethyl)-2,5-diphenyl-2,4-dihydro-3*H*-pyrazol-3-one **33**

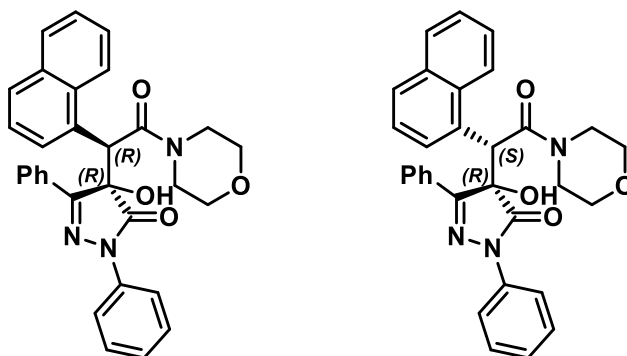

To a solution of 1,3-diphenyl-1*H*-pyrazole-4,5-dione (62.6 mg, 0.25 mmol), 2-(naphth-1-yl)acetic anhydride (132.9 mg, 0.375 mmol) and (2*R*,3*S*)-HyperBTM (3.9 mg, 0.125 mmol) were dissolved in ethyl acetate (6 ml, 0.04 M) at 0 °C. Diisopropylethylamine (54  $\mu$ l, 0.31 mmol) was added and the reaction mixture was stirred at 0 °C for 3 h. Morpholine (66  $\mu$ l, 0.75 mmol) was added and the reaction mixture was stirred for 16 h at rt. The reaction mixture was diluted with ethyl acetate and washed sequentially with 1 M aq. HCl ( $\times$ 2), sat. aq. NaHCO<sub>3</sub> ( $\times$ 2), and brine ( $\times$ 1). The organic layer was dried over MgSO<sub>4</sub>, filtered, and concentrated *in vacuo*. Purification by column chromatography (*n*-hexane : ethyl acetate 4:1 to 1:1) gave the major and minor diastereomer (123.6 mg, 98%, >95:5 dr) as an inseparable mixture as a pale yellow amorphous solid.  $[\alpha]_D^{20} +325.2$  (*c* 1.00, CHCl<sub>3</sub>); IR  $\nu_{\max}$  (film) 3271 (O-H), 3057, 2967 (C-H), 2920 (C-H), 2857 (C-H), 1721 (C=O, pyrazolone), 1639, 1595, 1491, 1111, 793, 779; **HRMS** (ESI<sup>+</sup>) C<sub>31</sub>H<sub>26</sub>N<sub>3</sub>O<sub>4</sub>Na [M+Na]<sup>+</sup> found 528.18787, requires 528.18938 (−2.9 ppm). *Data for major diastereomer anti-33: HPLC Analysis:* Chiralpak IB (90:10 hexane:isopropanol, flow rate 1.00 ml·min<sup>−1</sup>, 211 nm, 30 °C) *t*<sub>R</sub> (2'*R*,4*R*): 18.4 min, *t*<sub>R</sub> (2'*S*,4*S*): 10.9 min, 98:2 er; **<sup>1</sup>H NMR** (500 MHz, CDCl<sub>3</sub>)  $\delta$ <sub>H</sub>: 2.75 (1H, ddd, *J*<sub>HH</sub> 10.9, 7.6, 3.0, NCH<sub>2</sub>CH<sup>A</sup>H<sup>B</sup>), 2.88 (1H, ddd, *J*<sub>HH</sub> 14.2, 6.5, 3.0, NCH<sup>A</sup>H<sup>B</sup>CH<sub>2</sub>), 3.05-3.19 (2H, m, NCH<sup>A</sup>H<sup>B</sup>CH<sub>2</sub> + NCH<sub>2</sub>CH<sup>A</sup>H<sup>B</sup>), 3.41-3.52 (1H, m, NCH<sub>2</sub>CH<sup>C</sup>H<sup>D</sup>), 3.53-3.66 (2H, m, NCH<sup>C</sup>H<sup>D</sup>CH<sub>2</sub> + NCH<sub>2</sub>CH<sup>C</sup>H<sup>D</sup>), 3.66-3.80 (1H, m, NCH<sup>C</sup>H<sup>D</sup>CH<sub>2</sub>), 4.94 (1H, s, C(1')*H*), 6.87 (2H, app t, *J*<sub>HH</sub> 7.8, C(5)ArC(3,5)*H*), 6.99 (1H, t, *J*<sub>HH</sub> 7.4, C(5)ArC(4)*H*), 7.23-7.27 (1H, m, NArC(4)*H*), 7.36 (1H, t, *J*<sub>HH</sub> 7.4, C(1')HArC(6)*H*), 7.41-7.51 (6H, m, C(5)ArC(2,6)*H* + C(1')HArC(3)*H* + NArC(3,5)*H* + C(1')HArC(7)*H*), 7.59-7.67 (2H, m, C(1')HArC(4)*H* + C(1')HArC(5)*H*), 7.81 (1H, d, *J*<sub>HH</sub> 8.6, C(1')HArC(8)*H*), 7.88 (1H, d, *J*<sub>HH</sub> 7.2, C(1')HArC(2)*H*), 8.05 (2H, d, *J*<sub>HH</sub> 7.8, NArC(2,6)*H*); **<sup>13</sup>C{<sup>1</sup>H} NMR** (126 MHz, CDCl<sub>3</sub>)  $\delta$ <sub>C</sub>: 42.7 (NCH<sup>D</sup>H<sup>D</sup>CH<sub>2</sub>), 44.6 (C(1')*H*), 46.2 (NCH<sup>A</sup>H<sup>B</sup>CH<sub>2</sub>), 65.9 (NCH<sub>2</sub>CH<sup>A</sup>H<sup>B</sup>), 66.6 (NCH<sub>2</sub>CH<sup>C</sup>H<sup>D</sup>), 81.7 (C(4)-OH), 119.1 (NArC(2,6)*H*), 121.5 (C(1')HArC(8)*H*), 125.3 (ArCH), 125.4 (NArC(4)*H*), 125.6 (C(1')HArC(6)*H*), 126.5 (C(5)ArC(3,5)*H*), 127.2 (C(5)ArC(2,6)*H*), 128.9 (C(1')HArC(2)*H*), 129.1 (NArC(3,5)*H*), 129.4

(C(5)ArC(4)H), 129.5 (C(1')HArC(5)H), 129.6 (C(1')HArC(4)H), 130.6 (C(5)ArC(1)), 131.4 (ArC), 133.9 (C(1')HArC(4a)), 138.2 (NArC(1)), 157.1 (C(5)=N), 170.2 (C(2')=O), 173.3 (C(3)=O); *Data for minor diastereomer syn-33*: **HPLC Analysis**: Chiralpak IB (90:10 hexane:isopropanol, flow rate 1.00 ml·min<sup>-1</sup>, 211 nm, 30 °C) *t<sub>R</sub>* (2'*S*,4*R*): 9.6 min, *t<sub>R</sub>* (2'*R*,4*S*): 14.3 min, 61:39 er; **<sup>1</sup>H NMR** (500 MHz, CDCl<sub>3</sub>) (selected)  $\delta_{\text{H}}$ : 5.20 (1H, s, C(1')H), 7.70 (1H, d, *J*<sub>HH</sub> 8.1, ArH); **<sup>13</sup>C{<sup>1</sup>H} NMR** (126 MHz, CDCl<sub>3</sub>) (selected)  $\delta_{\text{C}}$ : 119.3 (NArC(2,6)H), 128.6 (ArCH), 128.7 (ArCH).

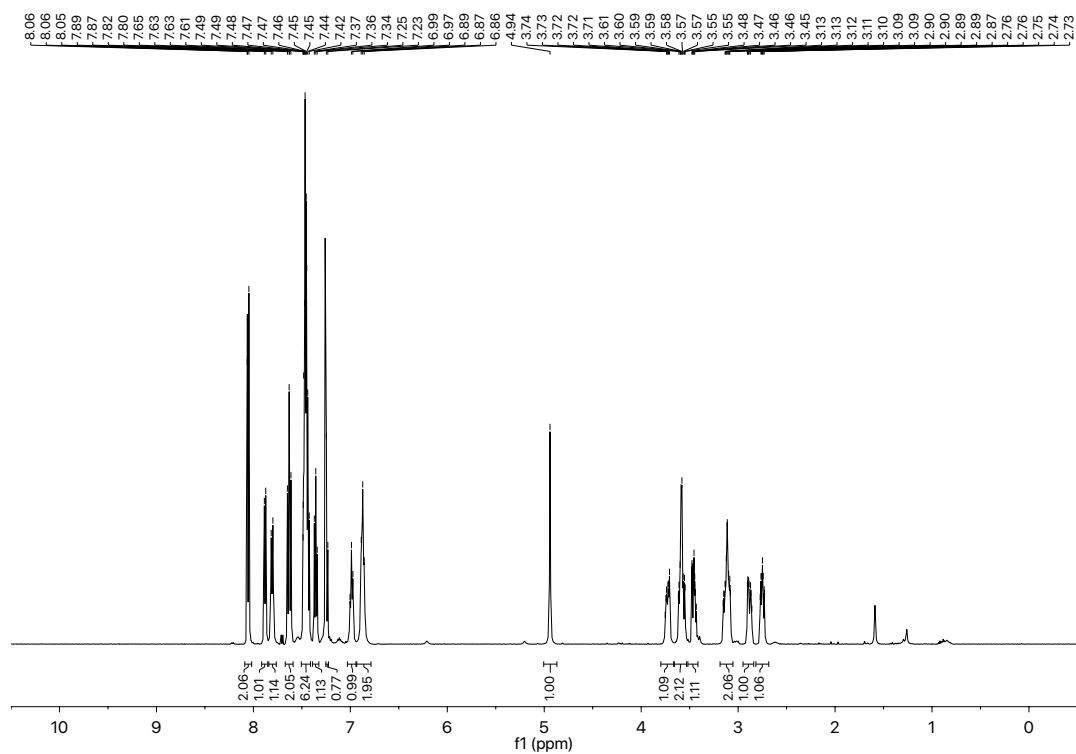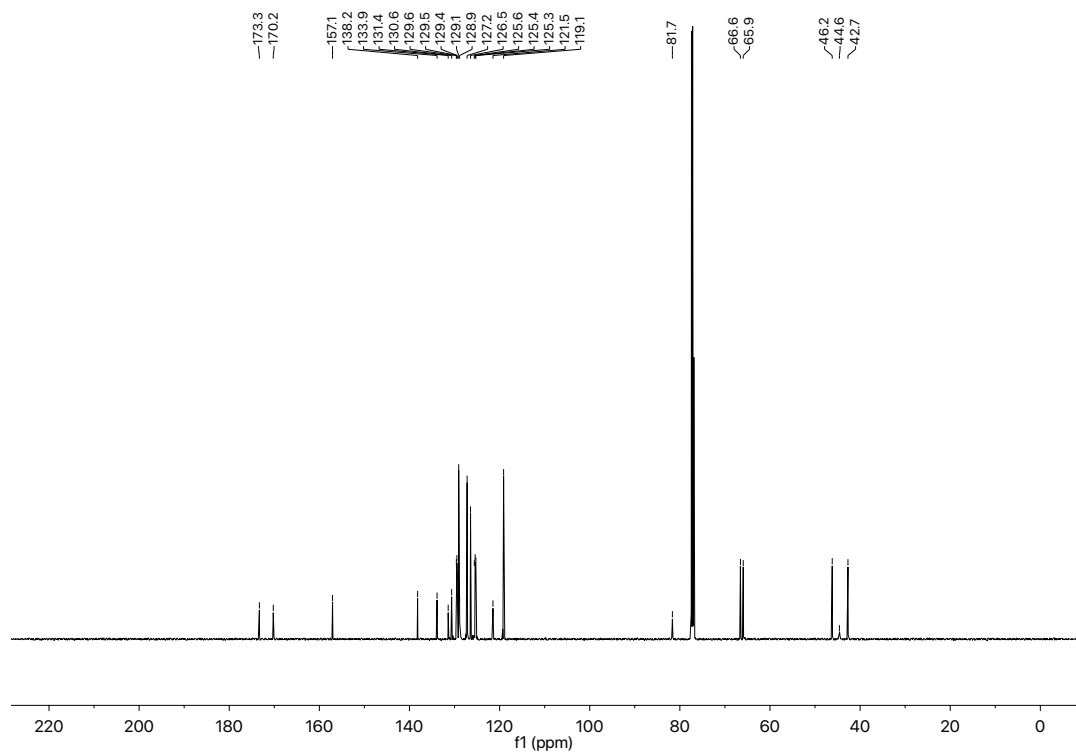

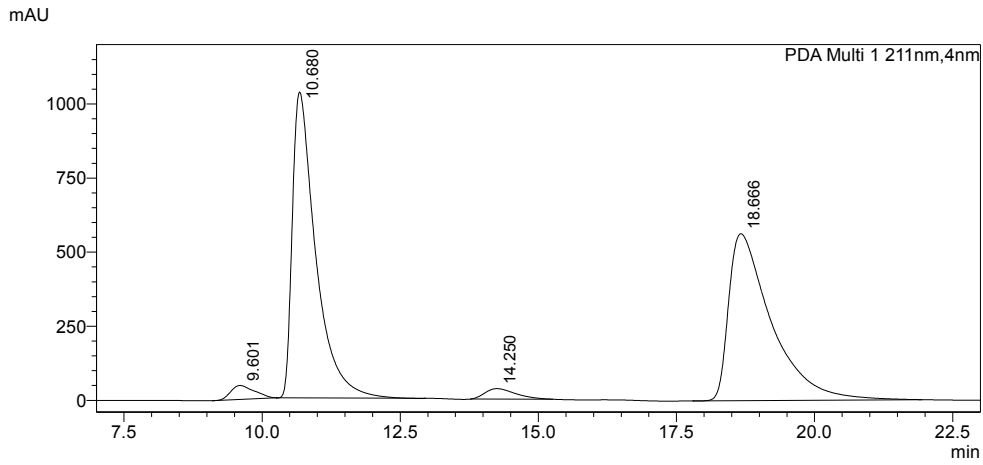

**<Peak Table>**

| PDA Ch1 211nm |           |         |
|---------------|-----------|---------|
| Peak#         | Ret. Time | Area%   |
| 1             | 9.601     | 2.207   |
| 2             | 10.680    | 47.929  |
| 3             | 14.250    | 2.143   |
| 4             | 18.666    | 47.721  |
| Total         |           | 100.000 |

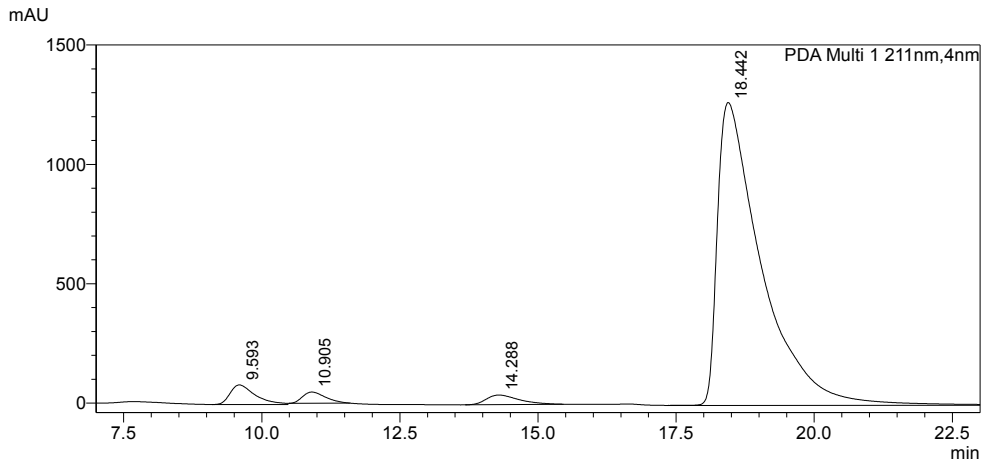

**<Peak Table>**

| PDA Ch1 211nm |           |         |
|---------------|-----------|---------|
| Peak#         | Ret. Time | Area%   |
| 1             | 9.593     | 3.410   |
| 2             | 10.905    | 1.766   |
| 3             | 14.288    | 2.166   |
| 4             | 18.442    | 92.658  |
| Total         |           | 100.000 |

5.19. (1'*R*,4*R*)- and (1'*S*,4*R*)-2-(*tert*-Butyl)-4-hydroxy-5-methyl-4-(2-morpholino-2-oxo-1-phenylethyl)-2,4-dihydro-3*H*-pyrazol-3-one **34**

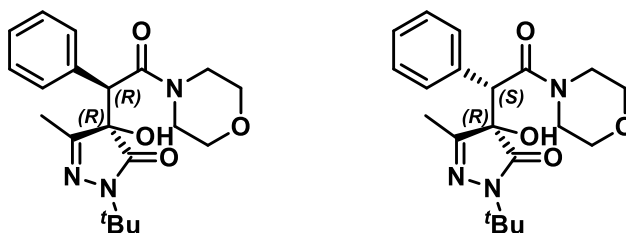

To a solution of 1-(*tert*-butyl)-3-methyl-1*H*-pyrazole-4,5-dione (42.1 mg, 0.25 mmol), 2-phenylacetic anhydride (95.4 mg, 0.375 mmol) and (2*R*,3*S*)-HyperBTM (3.9 mg, 0.125 mmol) were dissolved in ethyl acetate (6 ml, 0.04 M) at 0 °C. Diisopropylethylamine (54  $\mu$ l, 0.31 mmol) was added and the reaction mixture was stirred at 0 °C for 3 h. Morpholine (66  $\mu$ l, 0.75 mmol) was added and the reaction mixture was stirred for 16 h at rt. The reaction mixture was diluted with ethyl acetate and washed sequentially with 1 M aq. HCl ( $\times$ 2), sat. aq. NaHCO<sub>3</sub> ( $\times$ 2), and brine ( $\times$ 1). The organic layer was dried over MgSO<sub>4</sub>, filtered, and concentrated *in vacuo*. Purification by column chromatography (*n*-hexane : ethyl acetate 4:1 to 1:1) gave the product as a single diastereomer (48.5 mg, 52%) as a colourless semi-solid.  $[\alpha]_D^{20} +180.1$  (*c* 0.49, CHCl<sub>3</sub>); **HPLC Analysis:** Chiralpak AD-H (85:15 hexane:isopropanol, flow rate 2.00 ml·min<sup>-1</sup>, 211 nm, 30 °C) *t<sub>R</sub>* (1'*R*,4*R*)-**34**: 4.6 min, *t<sub>R</sub>* (1'*S*,4*S*)-**34**: 3.8 min, >99:1 er; **IR**  $\nu_{\max}$  (film) 3366 (O-H), 2974 (C-H), 2926 (C-H), 2859 (C-H), 1705 (C=O, pyrazolone), 1624, 1435, 1366, 1225, 1217, 1113; **<sup>1</sup>H NMR** (500 MHz, CDCl<sub>3</sub>)  $\delta_H$ : 1.32 (9H, s, NC(CH<sub>3</sub>)<sub>3</sub>), 1.95 (3H, s, C(5)CH<sub>3</sub>), 3.05-3.16 (2H, m, NCH<sup>A</sup>H<sup>B</sup>CH<sub>2</sub> + NCH<sub>2</sub>CH<sup>A</sup>H<sup>B</sup>), 3.30 (1H, ddd, *J<sub>HH</sub>* 14.0, 7.2, 3.1, NCH<sup>A</sup>H<sup>B</sup>CH<sub>2</sub>), 3.46 (1H, ddd, *J<sub>HH</sub>* 11.3, 6.4, 3.1, NCH<sub>2</sub>CH<sup>A</sup>H<sup>B</sup>), 3.52-3.66 (2H, m, NCH<sup>C</sup>H<sup>D</sup>CH<sub>2</sub> + NCH<sub>2</sub>CH<sup>C</sup>H<sup>D</sup>), 3.66-3.75 (2H, m, NCH<sup>C</sup>H<sup>D</sup>CH<sub>2</sub> + NCH<sub>2</sub>CH<sup>C</sup>H<sup>D</sup>), 4.16 (1H, s, C(1')H), 5.67 (1H, br s, OH), 7.23 (2H, dd, *J<sub>HH</sub>* 6.7, 3.0, C(1')HArC(2,6)H), 7.28-7.34 (3H, m, C(1')HArC(3,4,5)H); **<sup>13</sup>C{<sup>1</sup>H} NMR** (126 MHz, CDCl<sub>3</sub>)  $\delta_C$ : 16.0 (C(5)CH<sub>3</sub>), 28.0 (NC(CH<sub>3</sub>)<sub>3</sub>), 42.4 (NCH<sup>C</sup>H<sup>D</sup>CH<sub>2</sub>), 46.5 (NCH<sup>A</sup>H<sup>B</sup>CH<sub>2</sub>), 53.4 (C(1')H), 57.4 (NC(CH<sub>3</sub>)<sub>3</sub>), 66.0 (NCH<sub>2</sub>CH<sup>A</sup>H<sup>B</sup>), 66.7 (NCH<sub>2</sub>CH<sup>C</sup>H<sup>D</sup>), 81.6 (C(4)-OH), 128.7 (C(1')HArC(4)H), 128.9 (C(1')HArC(2,6)H), 129.1 (C(1')HArC(3,5)H), 132.3 (C(1')HArC(1)), 158.2 (C(5)=N), 170.4 (C(2')=O), 172.9 (C(3)=O); **HRMS** (ESI<sup>+</sup>) C<sub>20</sub>H<sub>28</sub>N<sub>3</sub>O<sub>4</sub> [M+H]<sup>+</sup> found 374.2064, requires 374.20733 (-2.8 ppm).

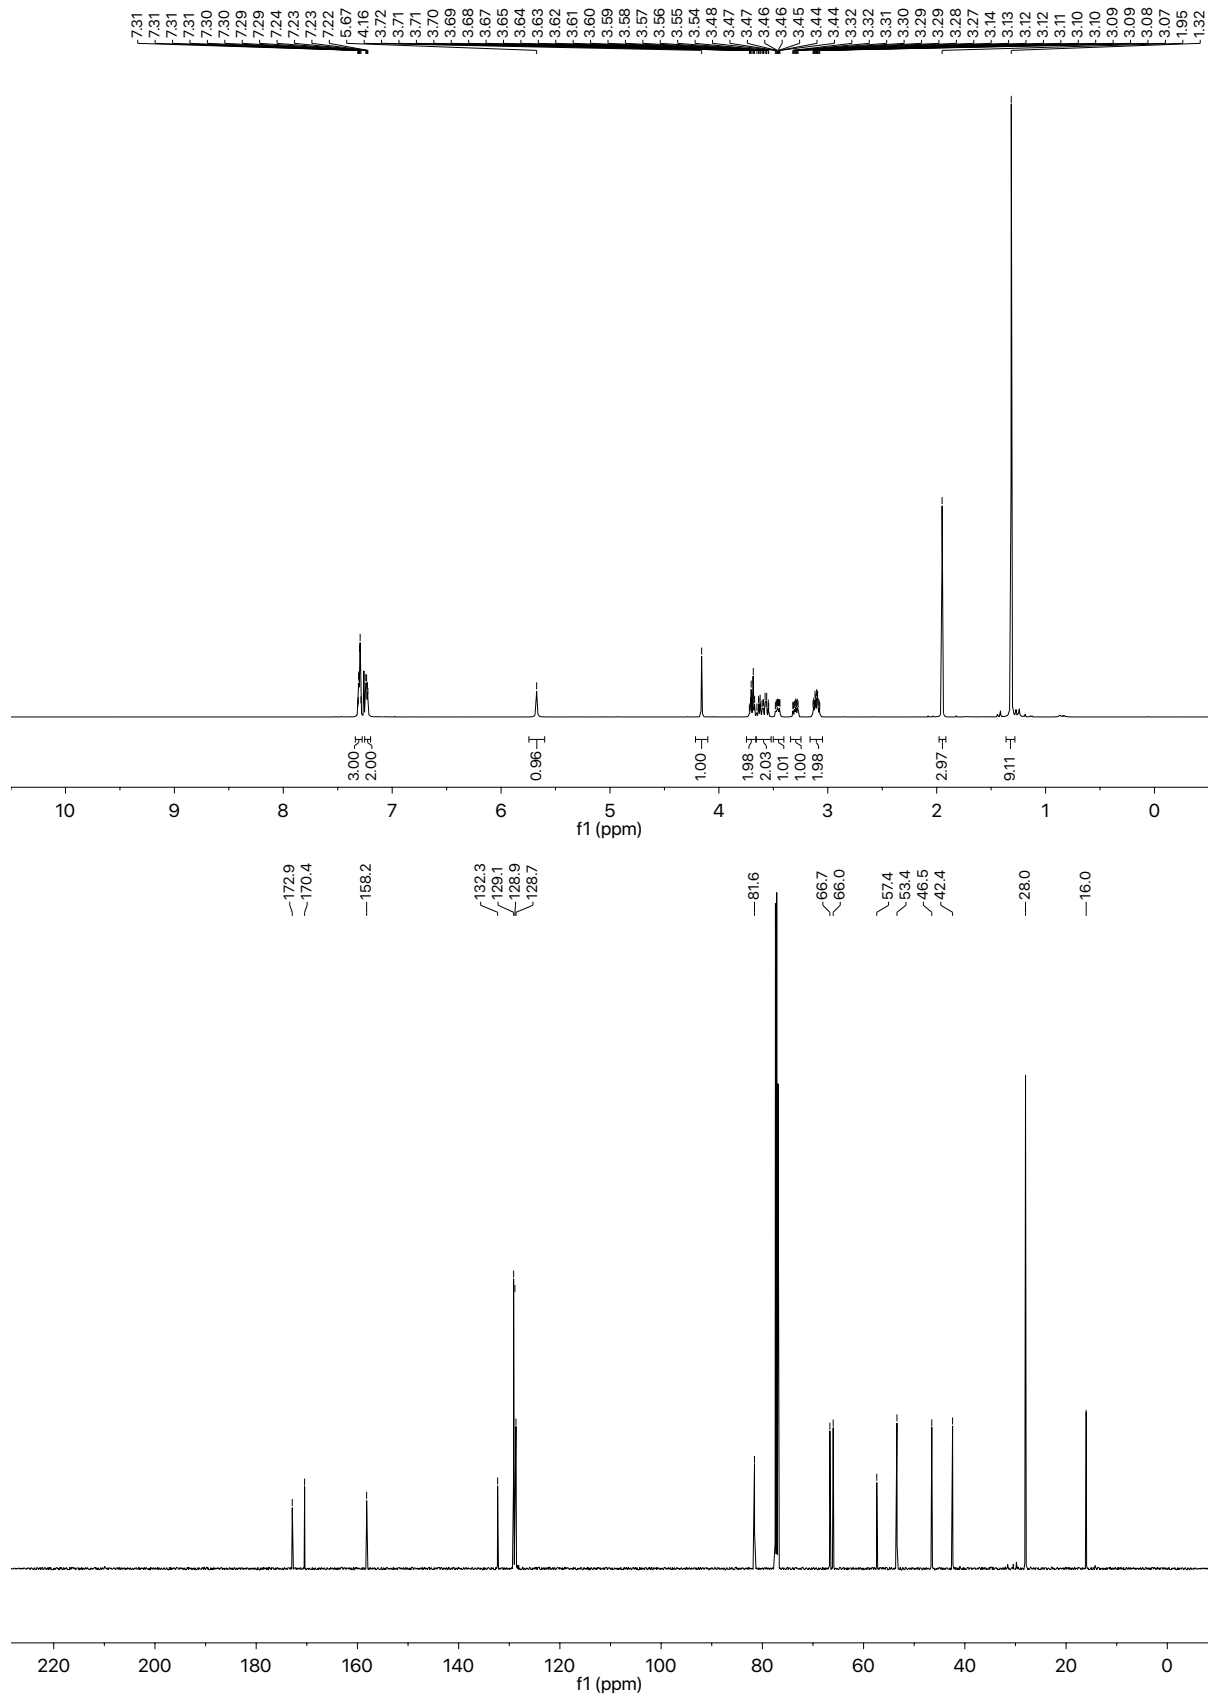



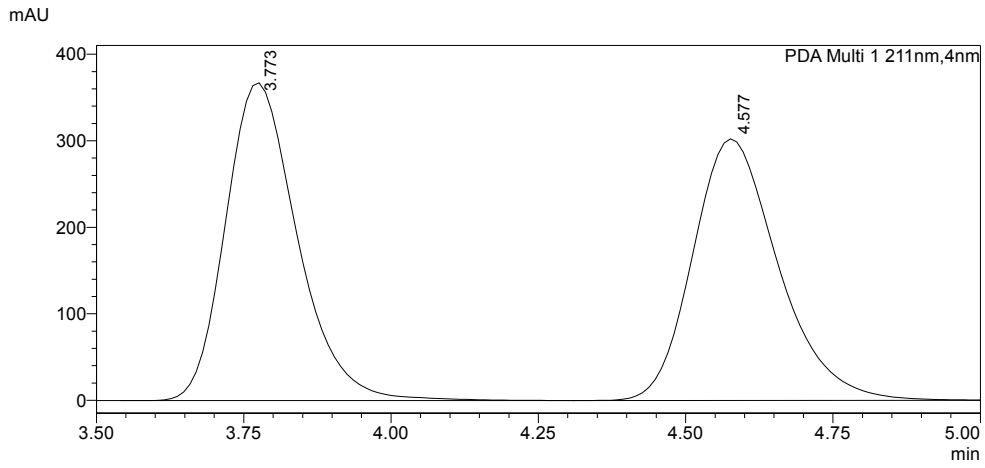

**<Peak Table>**

| PDA Ch1 211nm |           |         |
|---------------|-----------|---------|
| Peak#         | Ret. Time | Area%   |
| 1             | 3.773     | 50.489  |
| 2             | 4.577     | 49.511  |
| Total         |           | 100.000 |

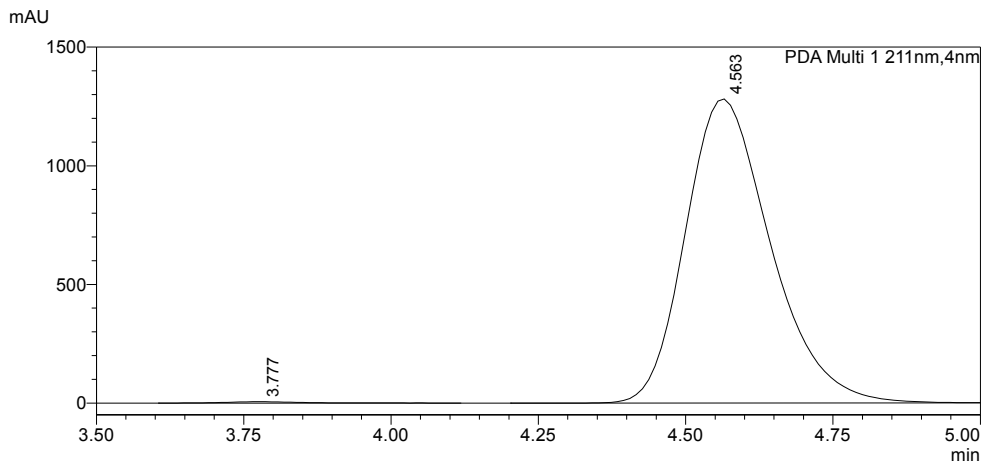

**<Peak Table>**

| PDA Ch1 211nm |           |         |
|---------------|-----------|---------|
| Peak#         | Ret. Time | Area%   |
| 1             | 3.777     | 0.349   |
| 2             | 4.563     | 99.651  |
| Total         |           | 100.000 |

5.20. (1'*R*,4*R*)- and (1'*S*,4*R*)-2-(*tert*-Butyl)-4-hydroxy-5-methyl-4-(2-morpholino-1-(naphth-1-yl)-2-oxoethyl)-2,4-dihydro-3*H*-pyrazol-3-one **35**

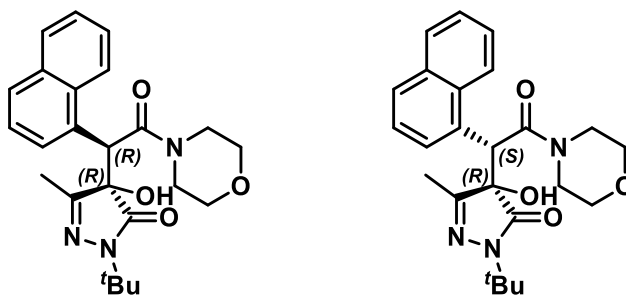

To a solution of 1-(*tert*-butyl)-3-methyl-1*H*-pyrazole-4,5-dione (42.1 mg, 0.25 mmol), 2-(naphth-1-yl)acetic anhydride (132.9 mg, 0.375 mmol) and (2*R*,3*S*)-HyperBTM (3.9 mg, 0.125 mmol) were dissolved in ethyl acetate (6 ml, 0.04 M) at 0 °C. Diisopropylethylamine (54  $\mu$ l, 0.31 mmol) was added and the reaction mixture was stirred at 0 °C for 3 h. Morpholine (66  $\mu$ l, 0.75 mmol) was added and the reaction mixture was stirred for 16 h at rt. The reaction mixture was diluted with ethyl acetate and washed sequentially with 1 M aq. HCl ( $\times$ 2), sat. aq. NaHCO<sub>3</sub> ( $\times$ 2), and brine ( $\times$ 1). The organic layer was dried over MgSO<sub>4</sub>, filtered, and concentrated *in vacuo*. Purification by column chromatography (*n*-hexane : ethyl acetate 4:1 to 1:1) gave the major and minor diastereomer (95.7 mg, 90%, >95:5 dr) as an inseparable mixture as a white amorphous solid.  $[\alpha]_D^{20} +233.4$  (*c* 1.00, CHCl<sub>3</sub>) IR  $\nu_{\max}$  (film) 3387 (O-H), 3051, 2974 (C-H), 2926 (C-H), 2857 (C-H), 1707 (C=O, pyrazolone), 1626, 1435, 1366, 1223, 1215, 1113, 783; HRMS (ESI<sup>+</sup>) C<sub>24</sub>H<sub>30</sub>N<sub>3</sub>O<sub>4</sub> [M+H]<sup>+</sup> found 424.2220, requires 424.2231 (–2.7 ppm). *Data for major diastereomer anti-106: HPLC Analysis:* Chiralpak AD-H (85:15 hexane:isopropanol, flow rate 2.00 ml·min<sup>-1</sup>, 211 nm, 30 °C) *t<sub>R</sub>* (1'*R*,4*R*)-**35**: 6.3 min, *t<sub>R</sub>* (1'*S*,4*S*)-**35**: 4.9 min, >99:1 er; <sup>1</sup>H NMR (500 MHz, CDCl<sub>3</sub>)  $\delta$ <sub>H</sub>: 1.02 (9H, s, NC(CH<sub>3</sub>)<sub>3</sub>), 1.84 (3H, s, C(5)CH<sub>3</sub>), 2.77 (1H, ddd, *J*<sub>HH</sub> 11.5, 7.2, 3.0, NCH<sub>2</sub>CH<sup>A</sup>H<sup>B</sup>), 2.91 (1H, ddd, *J*<sub>HH</sub> 13.5, 6.1, 3.0, NCH<sup>A</sup>H<sup>B</sup>CH<sub>2</sub>), 3.20 (1H, ddd, *J*<sub>HH</sub> 13.5, 7.2, 3.1, NCH<sup>A</sup>H<sup>B</sup>CH<sub>2</sub>), 3.27 (1H, ddd, *J*<sub>HH</sub> 11.5, 6.1, 3.1, NCH<sub>2</sub>CH<sup>A</sup>H<sup>B</sup>), 3.50 (1H, ddd, *J*<sub>HH</sub> 11.3, 7.1, 2.9, NCH<sub>2</sub>CH<sup>C</sup>H<sup>D</sup>), 3.59 (1H, ddd, *J*<sub>HH</sub> 13.0, 7.1, 2.8, NCH<sup>C</sup>H<sup>D</sup>CH<sub>2</sub>), 3.67 (1H, ddd, *J*<sub>HH</sub> 11.3, 5.9, 2.8, NCH<sub>2</sub>CH<sup>C</sup>H<sup>D</sup>), 3.73 (1H, ddd, *J*<sub>HH</sub> 13.0, 5.9, 2.9, NCH<sup>C</sup>H<sup>D</sup>CH<sub>2</sub>), 4.94 (1H, s, C(1')H), 6.13 (1H, br s, OH), 7.45 (1H, app t, *J*<sub>HH</sub> 7.7, C(1')HArC(3)H), 7.51 (1H, app t, *J*<sub>HH</sub> 7.3, C(1')HArC(7)H), 7.55-7.62 (2H, m, C(1')HArC(2)H + ArC(6)H), 7.83 (1H, d, *J*<sub>HH</sub> 8.2, C(1')HArC(4)H), 7.86 (1H, d, *J*<sub>HH</sub> 8.0, C(1')HArC(8)H), 8.07 (1H, d, *J*<sub>HH</sub> 8.6, C(1')HArC(5)H); <sup>13</sup>C{<sup>1</sup>H} NMR (126 MHz, CDCl<sub>3</sub>)  $\delta$ <sub>C</sub>: 15.9 (C(5)CH<sub>3</sub>), 27.7 (NC(CH<sub>3</sub>)<sub>3</sub>), 42.6 (NCH<sup>C</sup>H<sup>D</sup>CH<sub>2</sub>), 46.3 (NCH<sup>A</sup>H<sup>B</sup>CH<sub>2</sub>), 47.4 (C(1')H), 57.1 (NC(CH<sub>3</sub>)<sub>3</sub>), 65.8 (NCH<sub>2</sub>CH<sup>A</sup>H<sup>B</sup>), 66.6 (NCH<sub>2</sub>CH<sup>C</sup>H<sup>D</sup>), 81.6 (C(4)=O), 122.1 (C(1')HArC(5)H), 125.3 (C(1')HArC(3)H), 126.3 (C(1')HArC(7)H), 127.2 (C(1')HArC(6)H), 127.6 (C(1')HArC(2)H), 128.3 (C(1')HArC(1)), 129.5 (C(1')HArC(8)H), 129.5

(C(1')HArC(4)H), 130.9 (C(1')HArC(8a)), 133.9 (C(1')HArC(4a)), 158.4 (C(5)=N), 171.3 (C(2')=O), 173.3 (C(3)=O); Data for minor diastereomer *syn*-106: HPLC Analysis: Chiralpak AD-H (85:15 hexane:isopropanol, flow rate 2.00 ml·min<sup>-1</sup>, 211 nm, 30 °C) t<sub>R</sub> (1'*S*,4*R*)-**35**: 3.9 min, t<sub>R</sub> (1'*R*,4*S*)-**35**: 3.6 min (not detected); <sup>1</sup>H NMR (500 MHz, CDCl<sub>3</sub>) (selected) δ<sub>H</sub>: 1.31 (9H, s, NC(CH<sub>3</sub>)<sub>3</sub>), 2.03 (3H, s, C(5)CH<sub>3</sub>), 4.72 (1H, s, C(1')H).

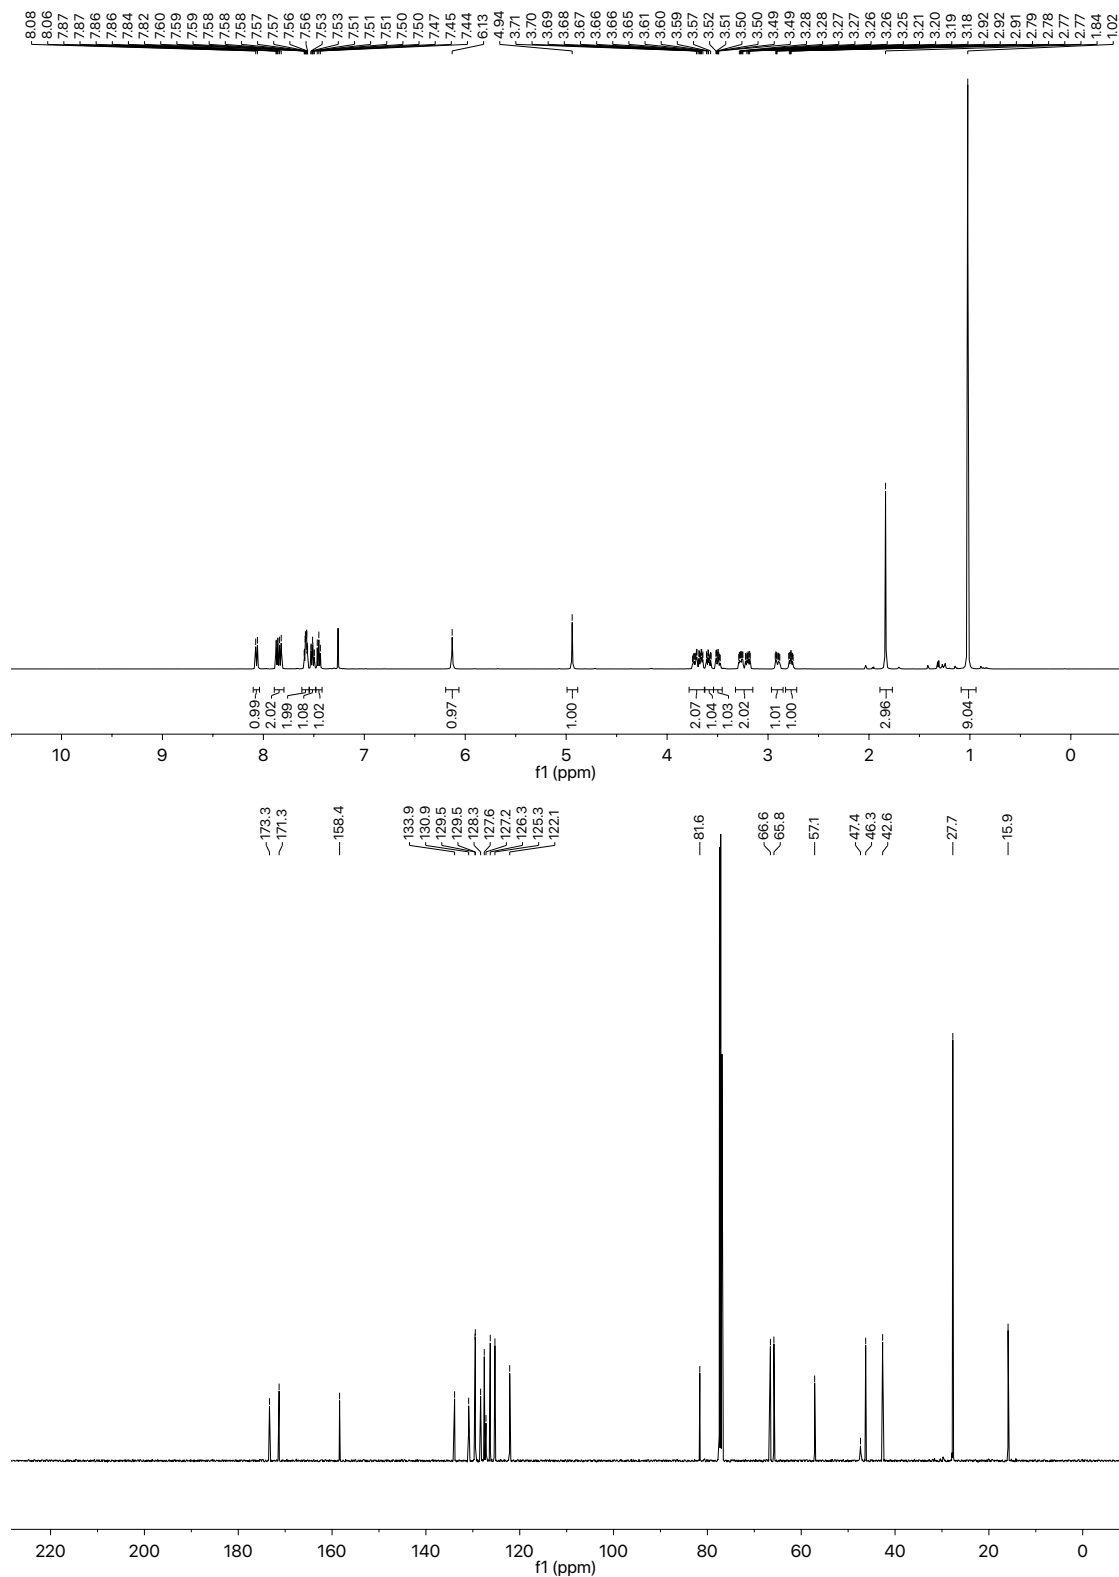

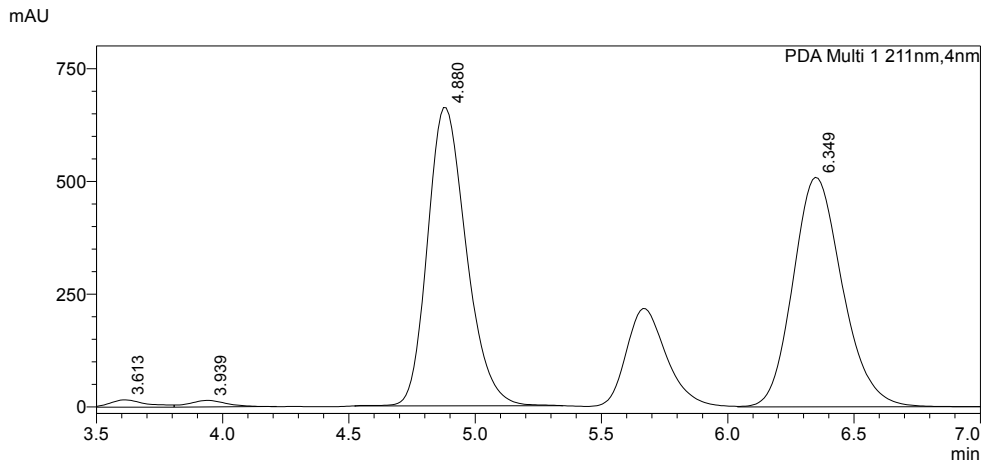

<Peak Table>

| PDA Ch1 211nm |           |         |
|---------------|-----------|---------|
| Peak#         | Ret. Time | Area%   |
| 1             | 3.613     | 1.148   |
| 2             | 3.939     | 0.996   |
| 3             | 4.880     | 49.382  |
| 4             | 6.349     | 48.475  |
| Total         |           | 100.000 |

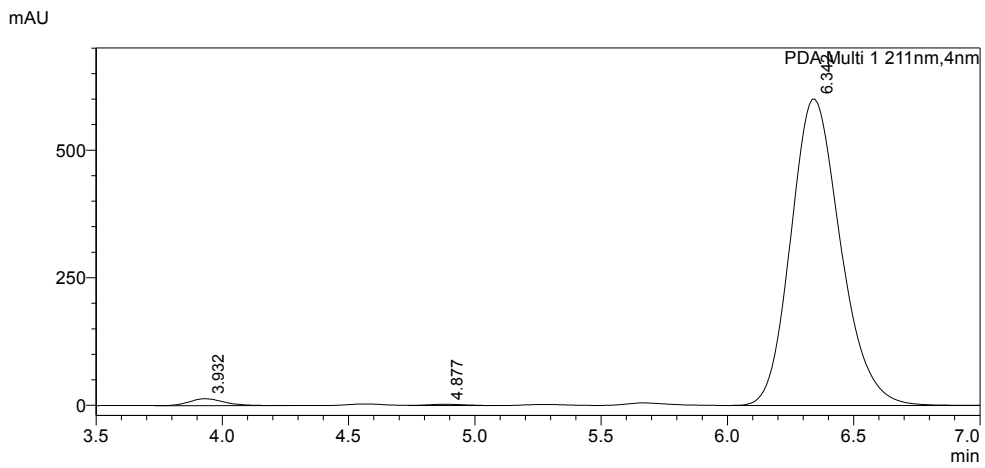

<Peak Table>

| PDA Ch1 211nm |           |         |
|---------------|-----------|---------|
| Peak#         | Ret. Time | Area%   |
| 1             | 3.932     | 1.552   |
| 2             | 4.877     | 0.321   |
| 3             | 6.342     | 98.127  |
| Total         |           | 100.000 |

5.21. (1'*R*,4*R*)- and (1'*S*,4*R*)-2-(*p*-Anisyl)-4-hydroxy-5-methyl-4-(2-morpholino-1-(naphtha-1-yl)-2-oxoethyl)-2,4-dihydro-3*H*-pyrazol-3-one **36**

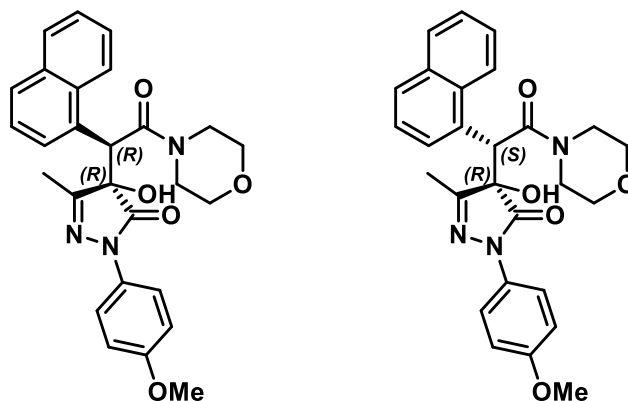

To a solution of 1-(*p*-anisyl)-3-methyl-1*H*-pyrazole-4,5-dione (54.6 mg, 0.25 mmol), 2-(naphth-1-yl)acetic anhydride (132.9 mg, 0.375 mmol) and (2*R*,3*S*)-HyperBTM (3.9 mg, 0.125 mmol) were dissolved in ethyl acetate (6 ml, 0.04 M) at 0 °C. Diisopropylethylamine (54  $\mu$ l, 0.31 mmol) was added and the reaction mixture was stirred at 0 °C for 3 h. Morpholine (66  $\mu$ l, 0.75 mmol) was added and the reaction mixture was stirred for 16 h at rt. The reaction mixture was diluted with ethyl acetate and washed sequentially with 1 M aq. HCl ( $\times 2$ ), sat. aq. NaHCO<sub>3</sub> ( $\times 2$ ), and brine ( $\times 1$ ). The organic layer was dried over MgSO<sub>4</sub>, filtered, and concentrated *in vacuo*. Purification by column chromatography (*n*-hexane : ethyl acetate 4:1 to 1:1) gave the major and minor diastereomer (115.3 mg, 97%, >95:5 dr) as an inseparable mixture as a white amorphous solid.  $[\alpha]_D^{20} +319.9$  (c 1.00, CHCl<sub>3</sub>); **IR**  $\nu_{\max}$  (film) 3333 (O-H), 3053, 2963 (C-H), 2918 (C-H), 2857 (C-H), 1713 (C=O, pyrazolone), 1639, 1628, 1508, 1439, 1244, 1113, 1032, 831, 783; **HRMS** (ESI<sup>+</sup>) C<sub>27</sub>H<sub>26</sub>N<sub>3</sub>O<sub>5</sub>Na [M+Na]<sup>+</sup> found 496.18299, requires 496.18429 (−2.6 ppm). **Data for major diastereomer anti-36: HPLC Analysis:** Chiralpak AD-H (85:15 hexane:isopropanol, flow rate 2.00 ml·min<sup>−1</sup>, 211 nm, 30 °C)  $t_R$  (1'*R*,4*R*)-**36**: 18.1 min,  $t_R$  (1'*S*,4*S*)-**36**: 30.0 min, >99:1 er; **<sup>1</sup>H NMR** (500 MHz, CDCl<sub>3</sub>)  $\delta_H$ : 1.52 (3H, s, C(5)CH<sub>3</sub>), 2.76 (1H, ddd,  $J_{HH}$  10.7, 7.3, 2.9, NCH<sub>2</sub>CH<sup>A</sup>H<sup>B</sup>), 2.96 (1H, ddd,  $J_{HH}$  13.6, 5.8, 2.9, NCH<sup>A</sup>H<sup>B</sup>CH<sub>2</sub>), 3.21-3.34 (2H, m, NCH<sup>A</sup>H<sup>B</sup>CH<sub>2</sub> + NCH<sub>2</sub>CH<sup>A</sup>H<sup>B</sup>), 3.49 (1H, ddd,  $J_{HH}$  11.5, 7.4, 3.0, NCH<sub>2</sub>CH<sup>C</sup>H<sup>D</sup>), 3.59 (1H, ddd,  $J_{HH}$  13.3, 7.4, 3.0, NCH<sup>C</sup>H<sup>D</sup>CH<sub>2</sub>), 3.70 (1H, ddd,  $J_{HH}$  11.5, 5.8, 3.0, NCH<sub>2</sub>CH<sup>C</sup>H<sup>D</sup>), 3.76-3.85 (2H, m, OCH<sub>3</sub> + NCH<sup>C</sup>H<sup>D</sup>CH<sub>2</sub>), 4.92 (1H, s, C(1')H), 6.81-6.88 (2H, m, NAr(3,5)H), 7.18 (1H, br s, OH), 7.46-7.54 (4H, m, NAr(2,6)H + C(1')HArC(3)H + C(1')HArC(7)H), 7.57 (1H, app t,  $J_{HH}$  7.2, C(1')HArC(6)H), 7.80 (1H, d,  $J_{HH}$  7.3, C(1')HArC(2)H), 7.88 (2H, app t,  $J_{HH}$  7.9, C(1')HArC(4)H + C(1')HArC(8)H), 7.96 (1H, d,  $J_{HH}$  8.5, C(1')HArC(5)H); **<sup>13</sup>C{<sup>1</sup>H} NMR** (126 MHz, CDCl<sub>3</sub>)  $\delta_C$ : 15.0 (C(5)CH<sub>3</sub>), 42.8 (NCH<sup>C</sup>H<sup>D</sup>), 44.9 (C(1')H), 46.3 (NCH<sup>A</sup>H<sup>B</sup>), 55.6 (OCH<sub>3</sub>), 65.9 (NCH<sub>2</sub>CH<sup>A</sup>H<sup>B</sup>), 66.6 (NCH<sub>2</sub>CH<sup>C</sup>H<sup>D</sup>), 81.3 (C(4)-OH), 114.0 (NArC(3,5)H), 120.9 (NArC(2,6)H), 121.4 (C(1')HArC(5)H),

125.6 (C(1')HArC(3)H), 126.3 (C(1')HArC(7)H), 127.8 (C(1')HArC(6)H), 127.9 (C(1')HArC(2)H), 129.8 (C(1')HArC(4)H), 129.8 (C(1')HArC(8)H), 130.9 (C(1')HArC), 130.9 (NArC(1)), 134.0 (C(1')HArC(4a)), 157.2 (NArC(4)), 160.5 (C(5)=N), 171.1 (C(2')=O), 172.3 (C(3)=O); Data for minor diastereomer *syn*-**36**: HPLC Analysis: Chiralpak AD-H (85:15 hexane:IPA, flow rate 2.00 ml·min<sup>-1</sup>, 211 nm, 30 °C) t<sub>R</sub> (1'*S*,4*R*)-**36**: 13.5 min, t<sub>R</sub> (1'*R*,4*S*)-**36**: 15.1 min (not detected); <sup>1</sup>H NMR (500 MHz, CDCl<sub>3</sub>) (selected) δ<sub>H</sub>: 2.15 (3H, s, CH<sub>3</sub>), 4.86 (1H, s, C(1')H).

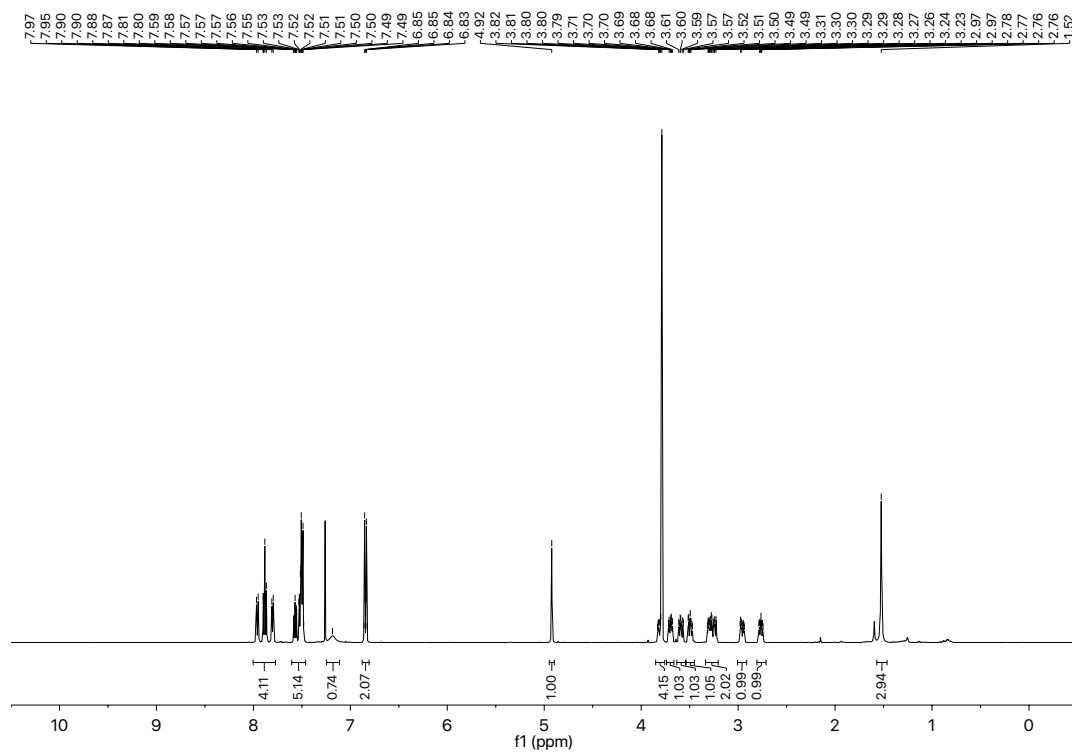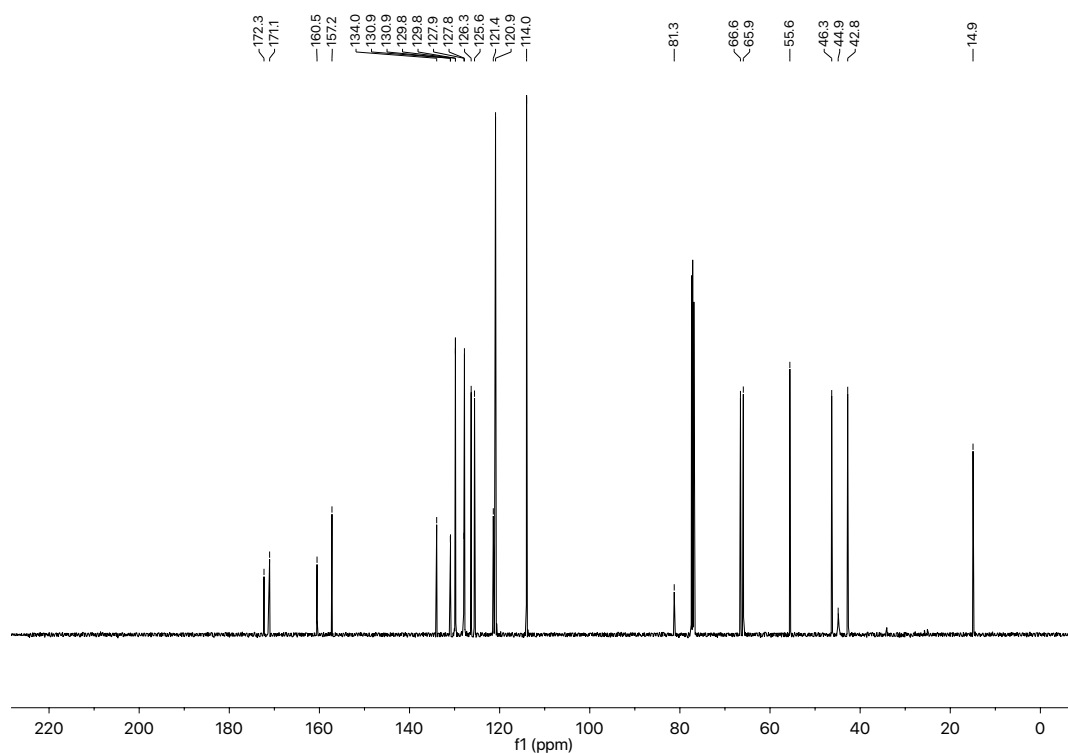

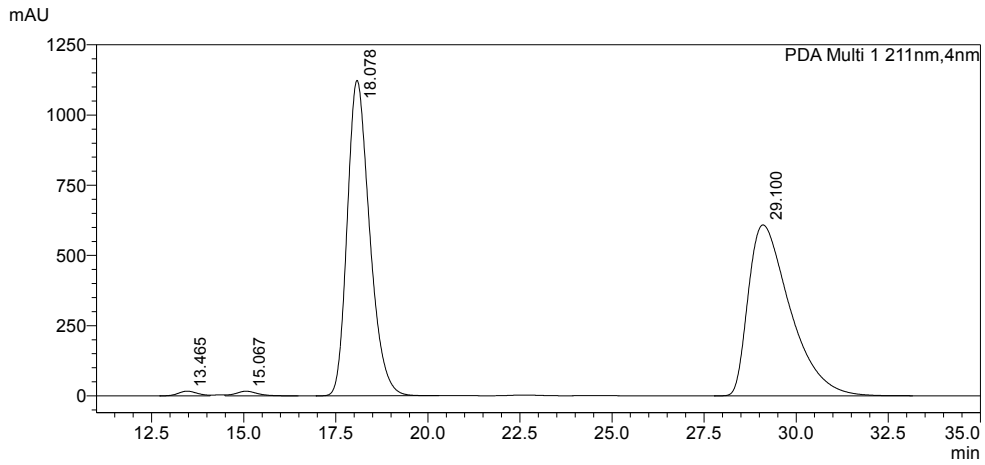

**<Peak Table>**

| PDA Ch1 211nm |           |         |
|---------------|-----------|---------|
| Peak#         | Ret. Time | Area%   |
| 1             | 13.465    | 0.622   |
| 2             | 15.067    | 0.692   |
| 3             | 18.078    | 49.068  |
| 4             | 29.100    | 49.618  |
| Total         |           | 100.000 |

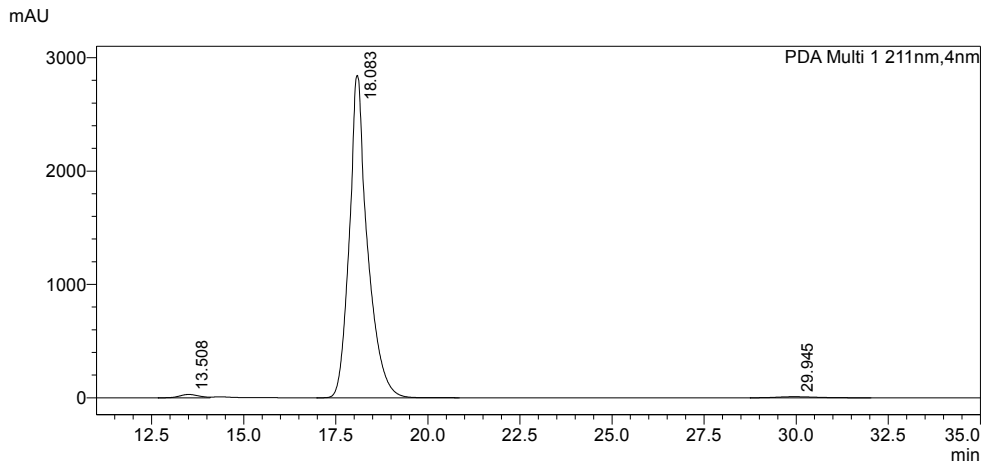

**<Peak Table>**

| PDA Ch1 211nm |           |         |
|---------------|-----------|---------|
| Peak#         | Ret. Time | Area%   |
| 1             | 13.508    | 1.054   |
| 2             | 18.083    | 98.232  |
| 3             | 29.945    | 0.714   |
| Total         |           | 100.000 |

5.22. (1'*R*,4*R*)- and (1'*S*,4*R*)-2-(*p*-Anisyl)-4-hydroxy-5-methyl-4-(2-morpholino-2-oxo-1-phenylethyl)-2,4-dihydro-3*H*-pyrazol-3-one **37**

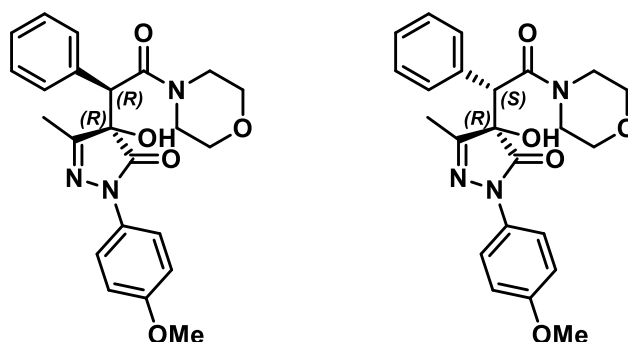

To a solution of 1-(*p*-anisyl)-3-methyl-1*H*-pyrazole-4,5-dione (54.6 mg, 0.25 mmol), 2-phenylacetic anhydride (95.4 mg, 0.375 mmol) and (2*R*,3*S*)-HyperBTM (3.9 mg, 0.125 mmol) were dissolved in ethyl acetate (6 ml, 0.04 M) at 0 °C. Diisopropylethylamine (54 μl, 0.31 mmol) was added and the reaction mixture was stirred at 0 °C for 3 h. Morpholine (66 μl, 0.75 mmol) was added and the reaction mixture was stirred for 16 h at rt. The reaction mixture was diluted with ethyl acetate and washed sequentially with 1 M aq. HCl (×2), sat. aq. NaHCO<sub>3</sub> (×2), and brine (×1). The organic layer was dried over MgSO<sub>4</sub>, filtered, and concentrated *in vacuo*. Purification by column chromatography (*n*-hexane : ethyl acetate 4:1 to 1:1) gave the product as a single diastereomer (76.8 mg, 73%) as a white amorphous solid.  $[\alpha]_D^{20} +278.3$  (*c* 1.00, CHCl<sub>3</sub>); **HPLC Analysis**: Chiralpak AD-H (95:5 hexane:isopropanol, flow rate 2.00 ml·min<sup>-1</sup>, 211 nm, 30 °C) *t<sub>R</sub>* (1'*R*,4*R*)-**37**: 57.5 min, *t<sub>R</sub>* (1'*S*,4*S*)-**37**: 45.7 min, >99:1 er; **IR** *v*<sub>max</sub> (film) 3370 (O-H), 2963 (C-H), 2920 (C-H), 2857 (C-H), 1711 (C=O, pyrazolone), 1622, 1510, 1441, 1244, 1113, 1032, 831; **<sup>1</sup>H NMR** (500 MHz, CDCl<sub>3</sub>)  $\delta$ <sub>H</sub>: 1.96 (3H, s, C(5)CH<sub>3</sub>), 3.08-3.19 (2H, m, NCH<sup>A</sup>H<sup>B</sup>CH<sub>2</sub> + NCH<sub>2</sub>CH<sup>A</sup>H<sup>B</sup>), 3.33 (1H, ddd, *J*<sub>HH</sub> 14.0, 7.3, 3.1, NCH<sup>A</sup>H<sup>B</sup>CH<sub>2</sub>), 3.49 (1H, ddd, *J*<sub>HH</sub> 11.4, 6.3, 3.1, NCH<sub>2</sub>CH<sup>A</sup>H<sup>B</sup>), 3.54-3.68 (2H, m, NCH<sup>C</sup>H<sup>D</sup>CH<sub>2</sub> + NCH<sub>2</sub>CH<sup>C</sup>H<sup>D</sup>), 3.69-3.79 (2H, m, NCH<sup>C</sup>H<sup>D</sup>CH<sub>2</sub> + NCH<sub>2</sub>CH<sup>C</sup>H<sup>D</sup>), 3.80 (3H, s, OCH<sub>3</sub>), 4.23 (1H, s, C(1')H), 6.27 (1H, br s, OH), 6.85-6.92 (2H, m, NArC(3,5)H), 7.24-7.27 (2H, m, C(1')HArC(2,6)H), 7.29-7.34 (3H, m, C(1')HArC(3,4,5)H), 7.53-7.59 (2H, m, NArC(2,6)H); **<sup>13</sup>C{<sup>1</sup>H} NMR** (126 MHz, CDCl<sub>3</sub>)  $\delta$ <sub>C</sub>: 15.7 (C(5)CH<sub>3</sub>), 42.5 (NCH<sup>C</sup>H<sup>D</sup>CH<sub>2</sub>), 46.6 (NCH<sup>A</sup>H<sup>B</sup>CH<sub>2</sub>), 52.7 (C(1')H), 55.6 (OCH<sub>3</sub>), 66.1 (NCH<sub>2</sub>CH<sup>A</sup>H<sup>B</sup>), 66.7 (NCH<sub>2</sub>CH<sup>C</sup>H<sup>D</sup>), 81.7 (C(4)-OH), 114.1 (NArC(3,5)H), 121.1 (NArC(2,6)H), 128.7 (C(1')HArC(2,6)H), 129.0 (C(1')HArC(4)H), 129.4 (C(1')HArC(3,5)H), 130.8 (C(1')HArC(1)), 132.1 (NArC(1)), 157.3 (NArC(4)), 160.7 (C(5)=N), 170.3 (C(2')=O), 171.3 (C(3)=O); **HRMS** (ESI<sup>+</sup>) C<sub>23</sub>H<sub>25</sub>N<sub>3</sub>O<sub>5</sub> [M+H]<sup>+</sup> found 446.16743, requires 446.16864 (-2.6 ppm).



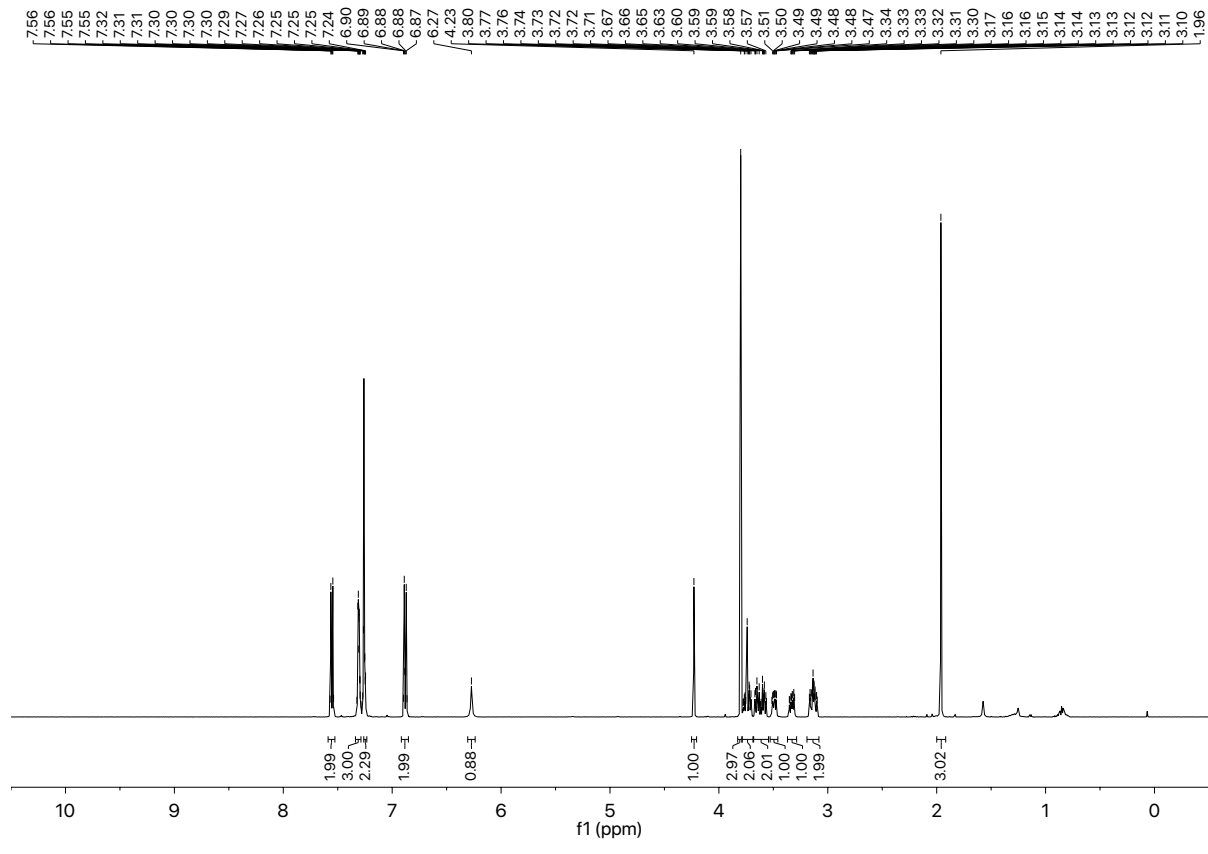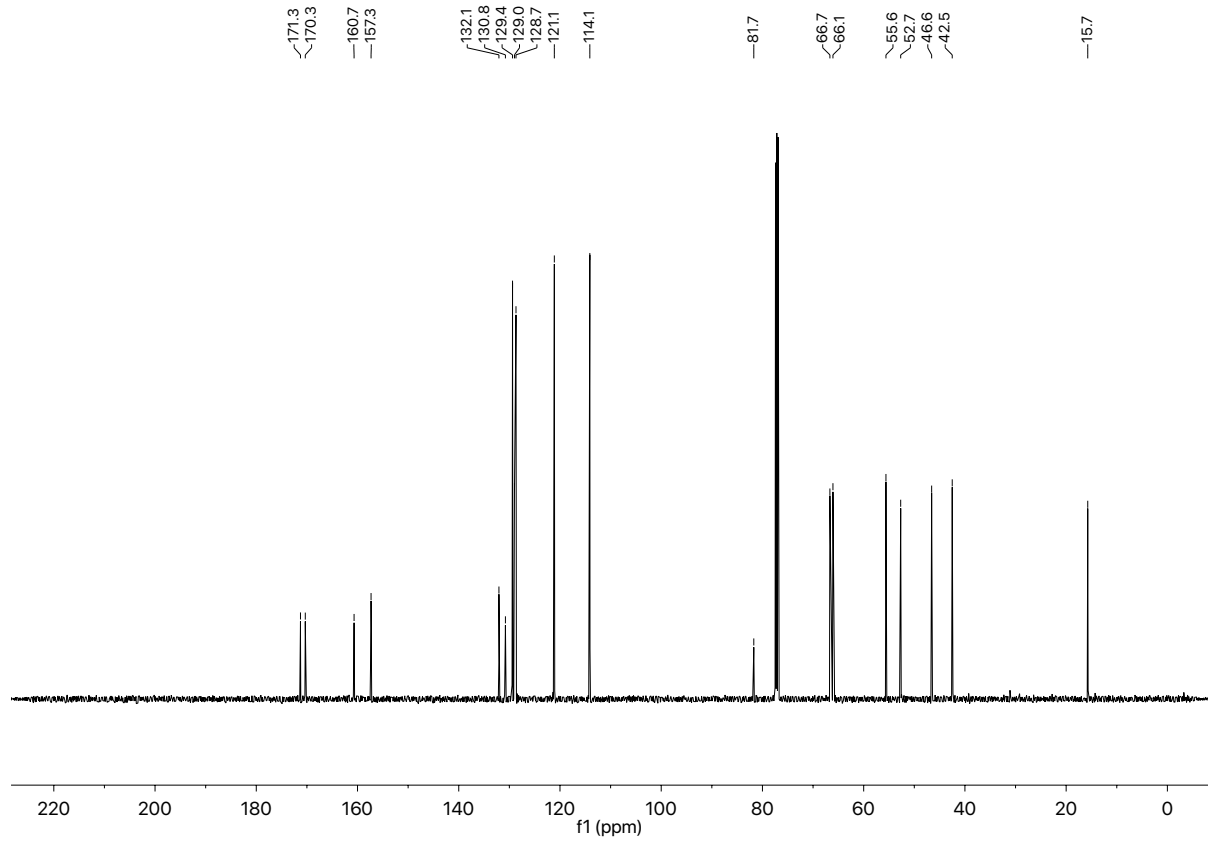

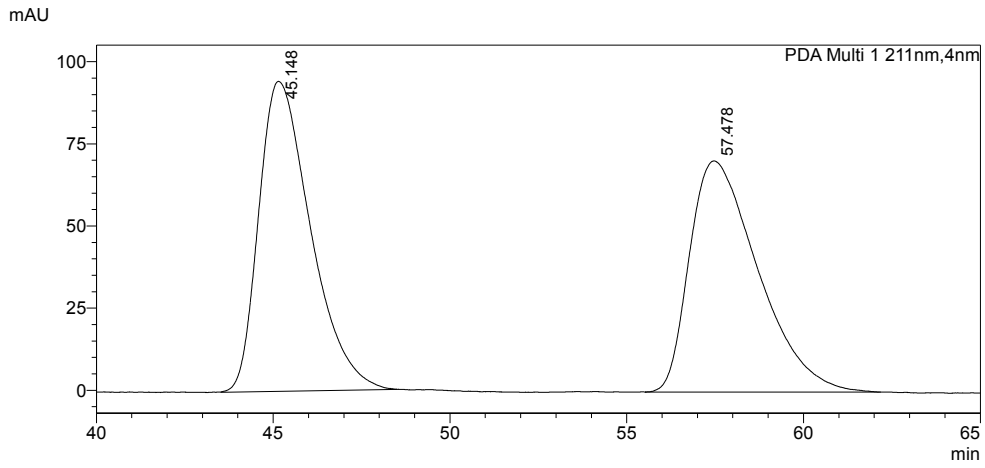

**<Peak Table>**

| PDA Ch1 211nm |           |         |
|---------------|-----------|---------|
| Peak#         | Ret. Time | Area%   |
| 1             | 45.148    | 50.363  |
| 2             | 57.478    | 49.637  |
| Total         |           | 100.000 |

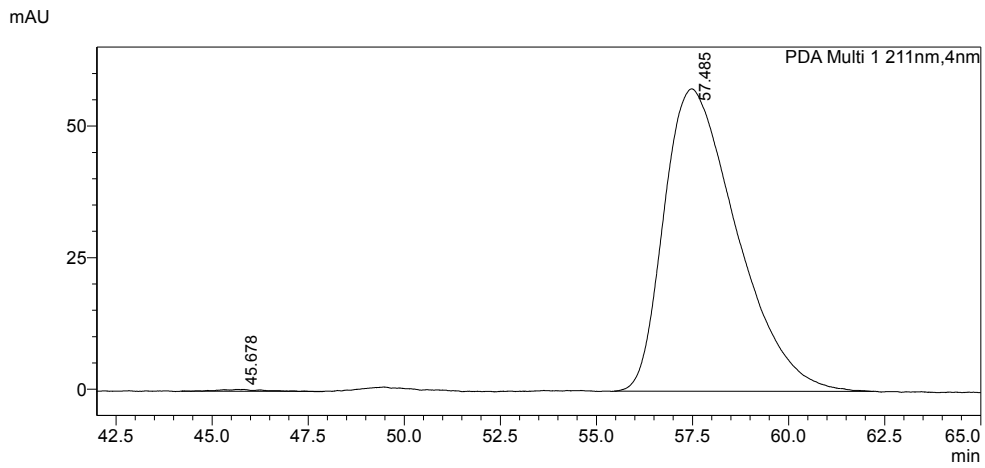

**<Peak Table>**

| PDA Ch1 211nm |           |         |
|---------------|-----------|---------|
| Peak#         | Ret. Time | Area%   |
| 1             | 45.678    | 0.385   |
| 2             | 57.485    | 99.615  |
| Total         |           | 100.000 |

5.23. (1'*R*,4*R*)- and (1'*S*,4*R*)-4-hydroxy-5-methyl-4-(2-morpholino-1-(naphtha-1-yl)-2-oxoethyl)-2-(*p*-trifluoromethylphenyl)-2,4-dihydro-3*H*-pyrazol-3-one **38**

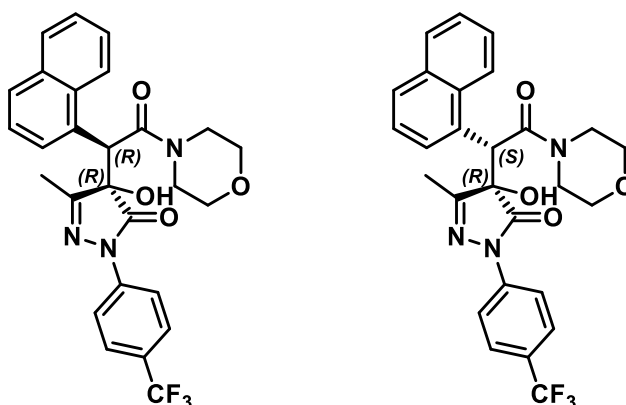

To a solution of 3-methyl-1-(*p*-trifluoromethylphenyl)-1*H*-pyrazole-4,5-dione (54.6 mg, 0.25 mmol), 2-(naphth-1-yl)acetic anhydride (132.9 mg, 0.375 mmol) and (2*R*,3*S*)-HyperBTM (3.9 mg, 0.125 mmol) were dissolved in ethyl acetate (6 ml, 0.04 M) at 0 °C. Diisopropylethylamine (54  $\mu$ l, 0.31 mmol) was added and the reaction mixture was stirred at 0 °C for 3 h. Morpholine (66  $\mu$ l, 0.75 mmol) was added and the reaction mixture was stirred for 16 h at rt. The reaction mixture was diluted with ethyl acetate and washed sequentially with 1 M aq. HCl ( $\times 2$ ), sat. aq. NaHCO<sub>3</sub> ( $\times 2$ ), and brine ( $\times 1$ ). The organic layer was dried over MgSO<sub>4</sub>, filtered, and concentrated *in vacuo*. Purification by column chromatography (*n*-hexane : ethyl acetate 4:1 to 1:1) gave the major and minor diastereomer (116.7 mg, 91%, >95:5 dr) as an inseparable mixture as a white amorphous solid.  $[\alpha]_D^{20} +268.7$  (c 1.00, CHCl<sub>3</sub>); **IR**  $\nu_{\max}$  (film) 3323 (O-H), 2967 (C-H), 2924 (C-H), 2859 (C-H), 1724 (C=O, pyrazolone), 1639, 1634, 1612, 1520, 1435 1323, 1163, 1115, 1065, 908, 841, 781; **HRMS** (ESI<sup>+</sup>) C<sub>27</sub>H<sub>25</sub>N<sub>3</sub>O<sub>4</sub>F<sub>3</sub> [M+H]<sup>+</sup> found 512.1779, requires 512.17917 (-2.4 ppm). **Data for major diastereomer anti-38: HPLC Analysis:** Chiralpak AD-H (92.5:7.5 hexane:isopropanol, flow rate 2.00 ml·min<sup>-1</sup>, 211 nm, 30 °C)  $t_R$  (1'*R*,4*R*)-**38**: 13.7 min,  $t_R$  (1'*S*,4*S*)-**38**: 31.1 min, 98.5:1.5 er; **<sup>1</sup>H NMR** (500 MHz, CDCl<sub>3</sub>)  $\delta_H$ : 1.61 (1H, s, CH<sub>3</sub>), 2.72 (1H, ddd,  $J_{HH}$  10.2, 7.0, 2.9, NCH<sub>2</sub>CH<sup>A</sup>H<sup>B</sup>), 2.92 (1H, ddd,  $J_{HH}$  13.4, 5.5, 2.9, NCH<sup>A</sup>H<sup>B</sup>CH<sub>2</sub>), 2.17-3.29 (2H, m, NCH<sup>A</sup>H<sup>B</sup>CH<sub>2</sub> + NCH<sub>2</sub>CH<sup>A</sup>H<sup>B</sup>), 3.47 (1H, ddd,  $J_{HH}$  11.5, 7.5, 3.0, NCH<sub>2</sub>CH<sup>C</sup>H<sup>D</sup>), 3.55 (1H, ddd,  $J_{HH}$  13.3, 7.5, 3.0, NCH<sup>C</sup>H<sup>D</sup>CH<sub>2</sub>), 3.66 (1H, ddd,  $J_{HH}$  11.5, 5.7, 3.0, NCH<sub>2</sub>CH<sup>C</sup>H<sup>D</sup>), 3.79 (1H, ddd,  $J_{HH}$  13.3, 5.7, 3.0, NCH<sup>C</sup>H<sup>D</sup>CH<sub>2</sub>), 4.94 (1H, s, C(1'*H*)), 6.96 (1H, br s, OH), 7.46-7.61 (5H, m, C(1'*H*)HArC(3)*H* + NArC(3,5)*H* + C(1'*H*)HArC(6)*H* + C(1'*H*)HArC(7)*H*), 7.77 (1H, d,  $J_{HH}$  7.2, C(1'*H*)HArC(2)*H*), 7.83-7.90 (4H, m, NArC(2,6)*H* + C(1'*H*)HArC(4)*H* + C(1'*H*)HArC(8)*H*), 7.94 (1H, d,  $J_{HH}$  8.6, C(1'*H*)HArC(5)*H*); **<sup>13</sup>C{<sup>1</sup>H} NMR** (126 MHz, CDCl<sub>3</sub>)  $\delta_C$ : 14.8 (CH<sub>3</sub>), 42.7 (NCH<sup>C</sup>H<sup>D</sup>CH<sub>2</sub>), 45.2 (C(1'*H*)), 46.2 (NCH<sup>A</sup>H<sup>B</sup>CH<sub>2</sub>), 65.8 (NCH<sub>2</sub>CH<sup>A</sup>H<sup>B</sup>), 66.5 (NCH<sub>2</sub>CH<sup>C</sup>H<sup>D</sup>), 81.1 (C(4)-OH), 118.2 (NArC(2,6)), 121.3 (C(1'*H*)HArC(5)*H*), 124.2 (q,  $^1J_{CF}$  272.2, ArCF<sub>3</sub>) 125.5 (C(1'*H*)HArC(3)*H*), 126.1 (q,

$^3J_{CF}$  3.8, NArC(3,5)H), 126.3 (C(1')HArC(7)H), 126.6 (q,  $^2J_{CF}$  32.5, NArC(4)CF<sub>3</sub>), 127.3 (C(1')HArC), 127.8 (C(1')HArC(6)H), 128.1 (C(1')HArC(2)H), 129.8 (C(1')HArC(4)H), 129.9 (C(1')HArC(8)), 130.9 (NArC(1)), 134.0 (C(1')HArC), 140.4 (NArC(1)), 161.2 (C(5)=N), 170.6 (C(2')=O), 172.9 (C(3)=O);  $^{19}F\{^1H\}$  NMR (377 MHz, CDCl<sub>3</sub>)  $\delta_F$ : -62.12 (CF<sub>3</sub>); *Data for minor diastereomer syn-38*: **HPLC Analysis**: Chiralpak AD-H (92.5:7.5 hexane:isopropanol, flow rate 2.00 ml·min<sup>-1</sup>, 211 nm, 30 °C)  $t_R$  (1'S,4R)-**38**: 15.7 min,  $t_R$  (1'R,4S)-**38**: 16.4 min (not detected);  $^1H$  NMR (500 MHz, CDCl<sub>3</sub>) (*selected*)  $\delta_H$ : 2.12 (3H, s, CH<sub>3</sub>), 4.91 (1H, s, C(1')H), 5.93 (1H, br s, OH);  $^{13}C\{^1H\}$  NMR (126 MHz, CDCl<sub>3</sub>) (*selected*)  $\delta_C$ : 15.3 (CH<sub>3</sub>), 120.9 (ArCH), 127.0 (ArCH);  $^{19}F$  NMR (377 MHz, CDCl<sub>3</sub>)  $\delta_F$ : -62.07 (CF<sub>3</sub>).

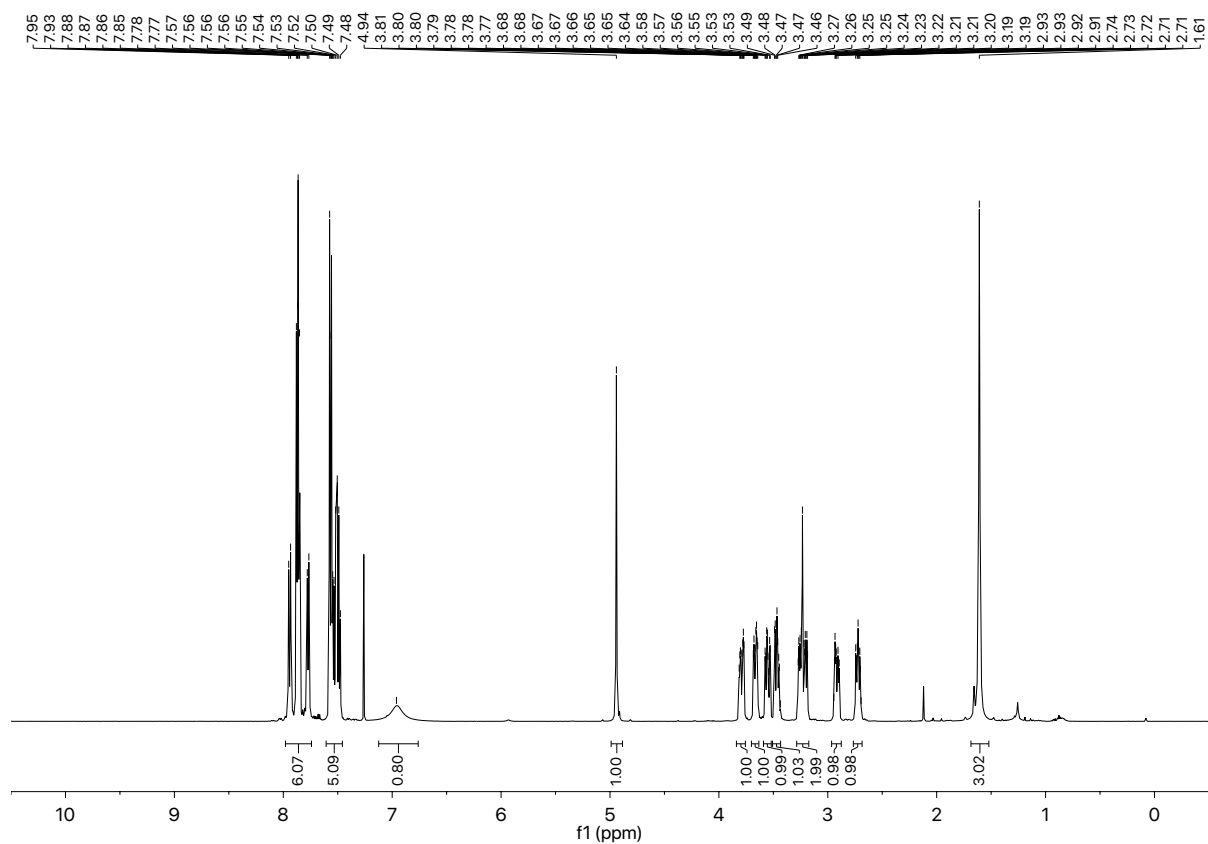

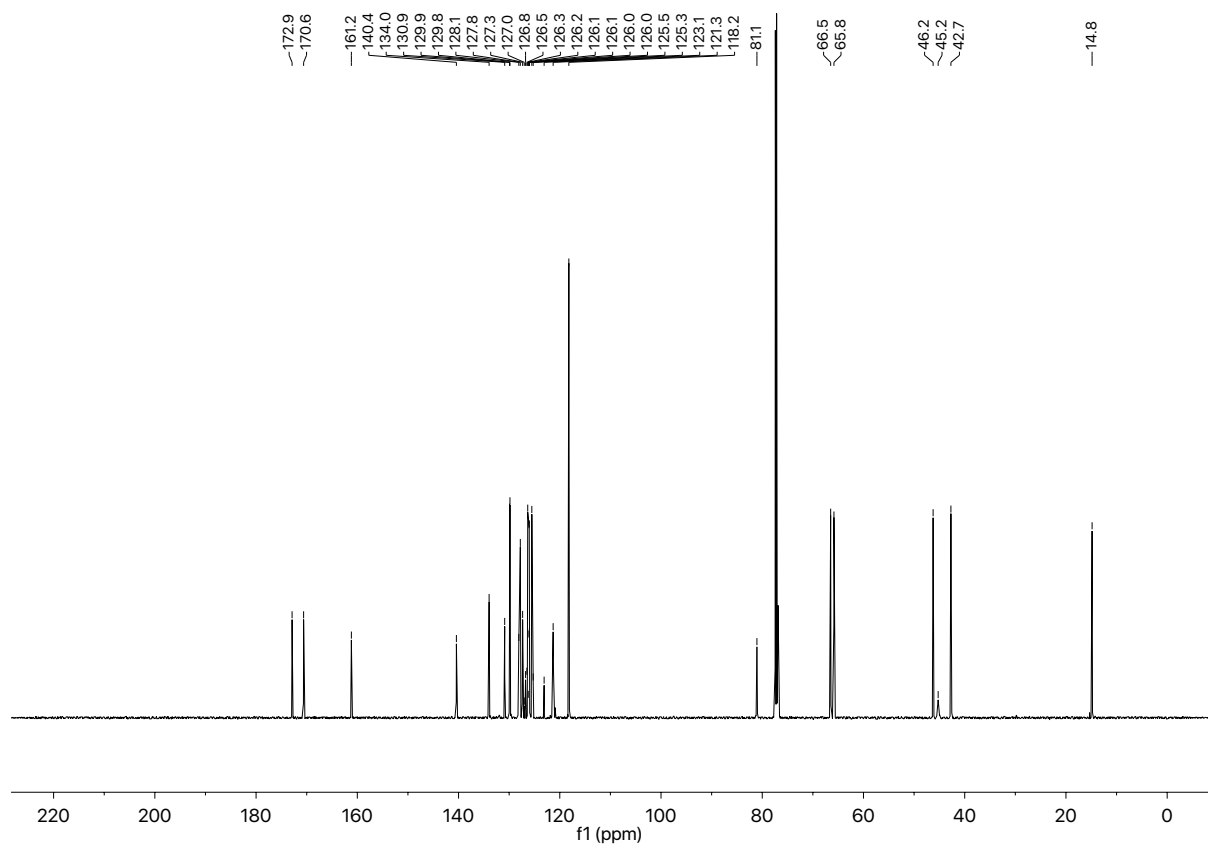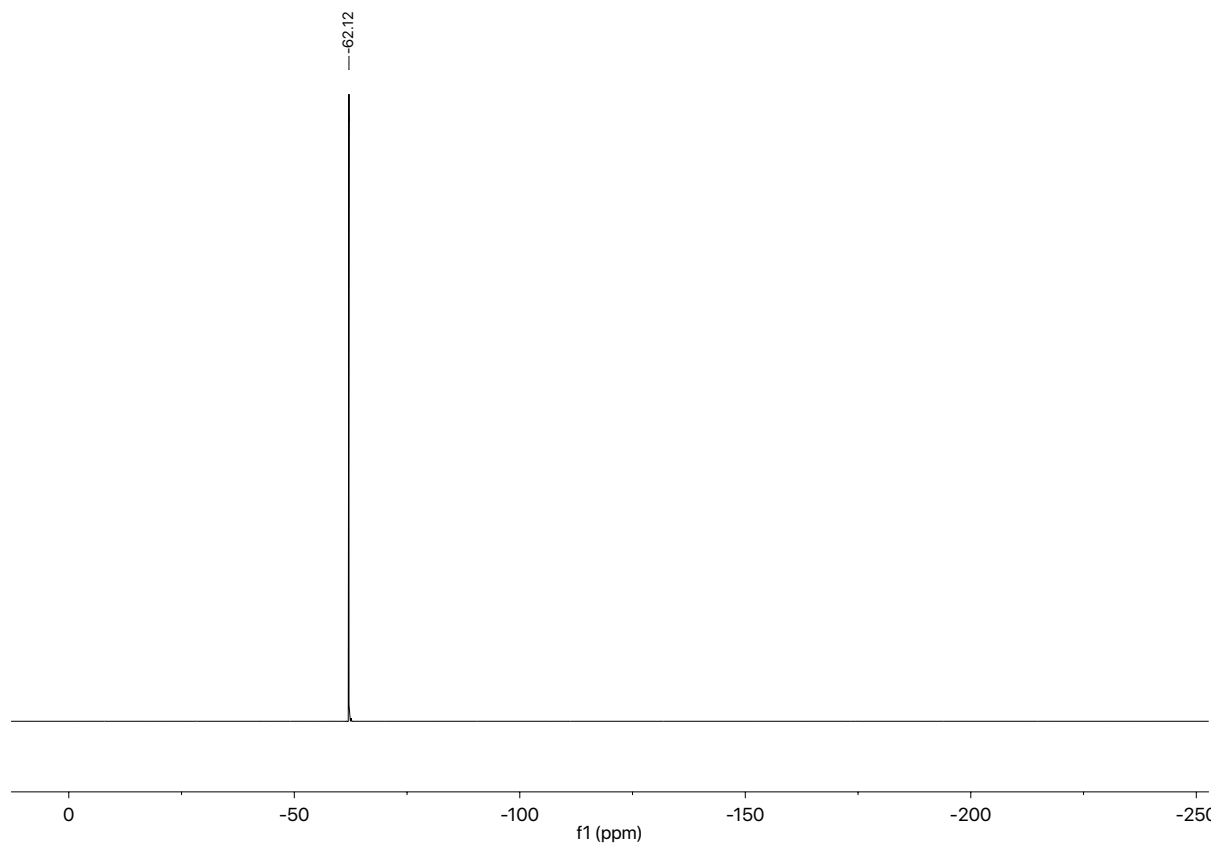

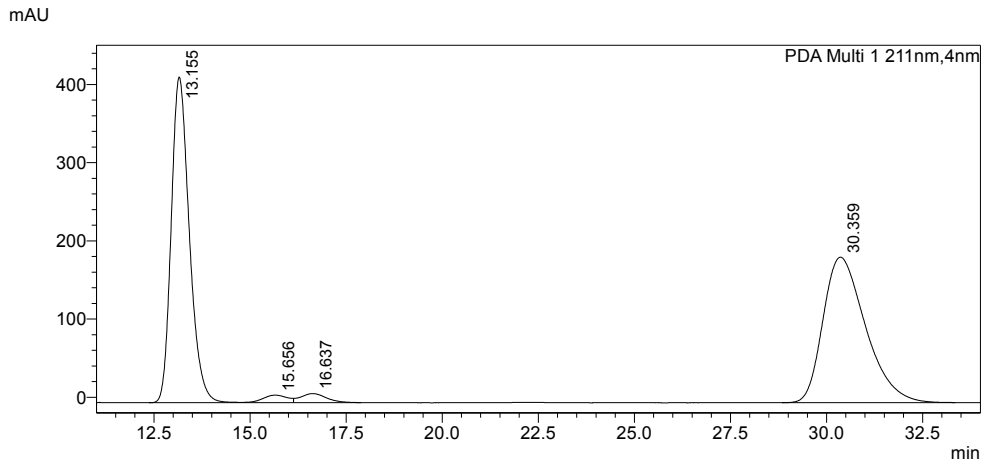

**<Peak Table>**

PDA Ch1 211nm

| Peak# | Ret. Time | Area%   |
|-------|-----------|---------|
| 1     | 13.155    | 47.137  |
| 2     | 15.656    | 1.489   |
| 3     | 16.637    | 1.873   |
| 4     | 30.359    | 49.502  |
| Total |           | 100.000 |

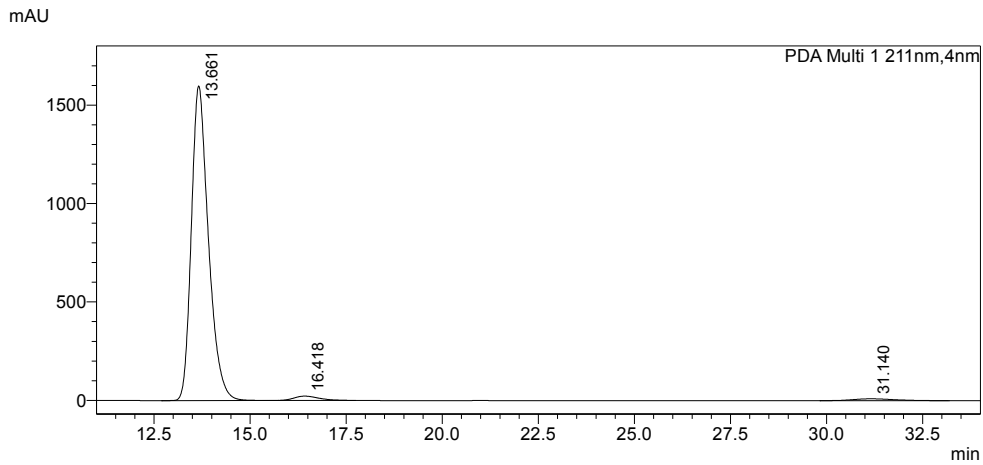

**<Peak Table>**

PDA Ch1 211nm

| Peak# | Ret. Time | Area%   |
|-------|-----------|---------|
| 1     | 13.661    | 96.684  |
| 2     | 16.418    | 1.913   |
| 3     | 31.140    | 1.403   |
| Total |           | 100.000 |

5.24. (1'*R*,4*R*)- and (1'*S*,4*R*)-2-(4-Hydroxy-3-methyl-5-oxo-1-phenyl-4,5-dihydro-1*H*-pyrazol-4-yl)-2-phenylacetate **39**

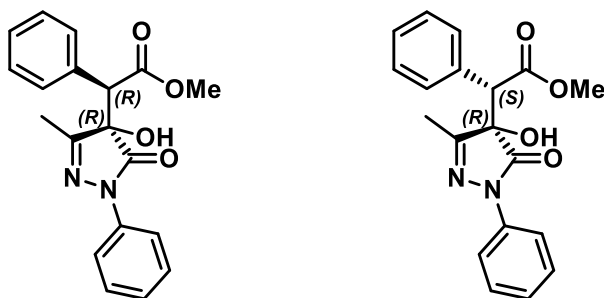

To a solution of 3-methyl-1-phenyl-1*H*-pyrazole-4,5-dione (47.1 mg, 0.25 mmol), 2-phenylacetic anhydride (95.4 mg, 0.375 mmol) and (2*R*,3*S*)-HyperBTM (3.9 mg, 0.125 mmol) were dissolved in ethyl acetate (6 ml, 0.04 M) at 0 °C. Diisopropylethylamine (54  $\mu$ l, 0.31 mmol) was added and the reaction mixture was stirred at 0 °C for 3 h. DMAP (6.1 mg, 0.05 mmol) and methanol (4.0 ml) were added and the reaction mixture was stirred for 16 h at rt. The reaction mixture was diluted with ethyl acetate and washed sequentially with 1 M aq. HCl ( $\times 2$ ), sat. aq. NaHCO<sub>3</sub> ( $\times 2$ ), and brine ( $\times 1$ ). The organic layer was dried over MgSO<sub>4</sub>, filtered, and concentrated *in vacuo*. Purification by column chromatography (*n*-hexane : ethyl acetate 4:1 to 1:1) gave the product as a single diastereomer (55.0 mg, 65%) as an off-white semi-solid.  $[\alpha]_D^{20} +225.9$  (*c* 0.39, CHCl<sub>3</sub>); **HPLC Analysis:** Chiralpak AD-H H (85:15 hexane:isopropanol, flow rate 2.00 ml·min<sup>-1</sup>, 211 nm, 30 °C) *t<sub>R</sub>* (2'*R*,4*R*)-**39**: 5.1 min, *t<sub>R</sub>* (2'*S*,4*S*)-**39**: 10.5 min, 98:2 er; **IR**  $\nu_{\max}$  (film) 3377 (O-H), 2953 (C-H), 2361, 2342, 1738, 1717 (C=O, pyrazolone), 1699, 1597, 1501, 1360, 1202, 1167, 908, 754; **<sup>1</sup>H NMR** (500 MHz, CDCl<sub>3</sub>)  $\delta_H$ : 1.88 (3H, s, C(3)CH<sub>3</sub>), 3.78 (3H, s, OCH<sub>3</sub>), 4.01 (1H, s, C(2')H), 4.98 (1H, s, OH), 7.17 (1H, t, *J<sub>HH</sub>* 7.4, NArC(4)H), 7.30-7.43 (7H, m, C(2')HArC(2,3,4,5,6)H + NArC(3,5)H), 7.69 (2H, d, *J<sub>HH</sub>* 8.1, NArC(2,6)H); **<sup>13</sup>C{<sup>1</sup>H} NMR** (126 MHz, CDCl<sub>3</sub>)  $\delta_C$ : 15.0 (C(3)CH<sub>3</sub>), 53.0 (OCH<sub>3</sub>), 54.9 (C(2')H), 80.4 (C(4)-OH), 119.1 (NArC(2,6)H), 125.6 (NArC(4)H), 128.9 (C(2')HArC(3,5)H), 128.9 (NArC(3,5)H), 129.1 (C(2')HArC(4)H), 129.6 (C(2')HArC(2,6)H), 131.3 (C(2')HArC(1)), 137.4 (NArC(1)), 159.7 (C(3)=N), 171.6 (C(5)=O), 172.2 (C(1')=O); **HRMS** (ESI<sup>+</sup>) C<sub>19</sub>H<sub>19</sub>N<sub>2</sub>O<sub>4</sub> [M+H]<sup>+</sup> found 339.1332, requires 339.1339 (-2.2 ppm).

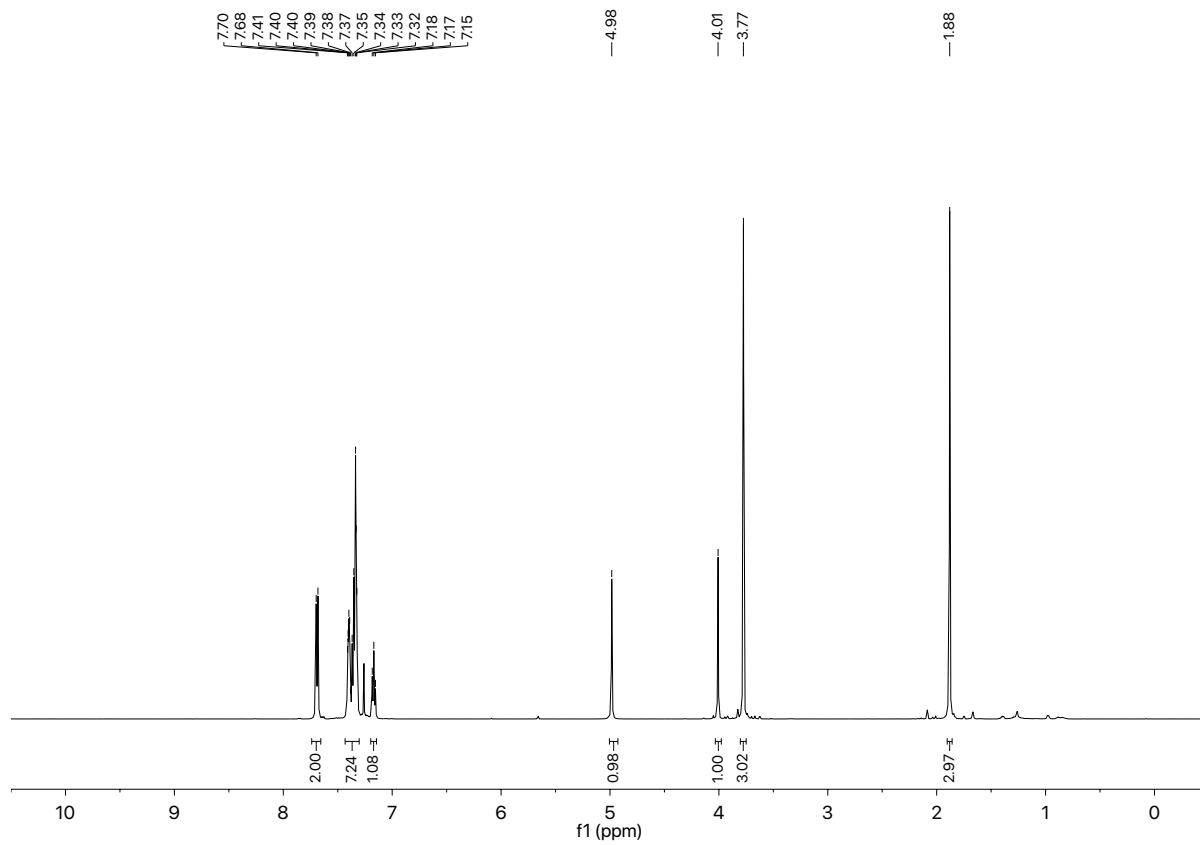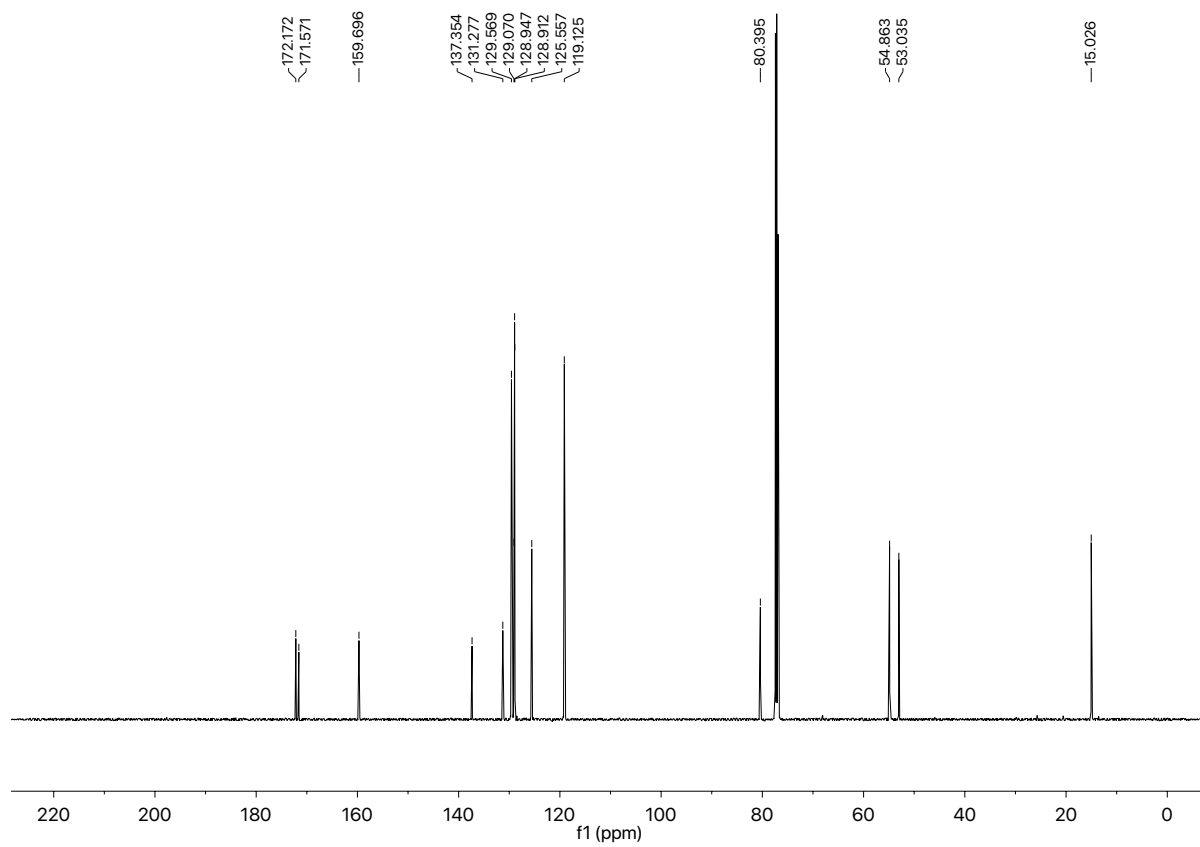



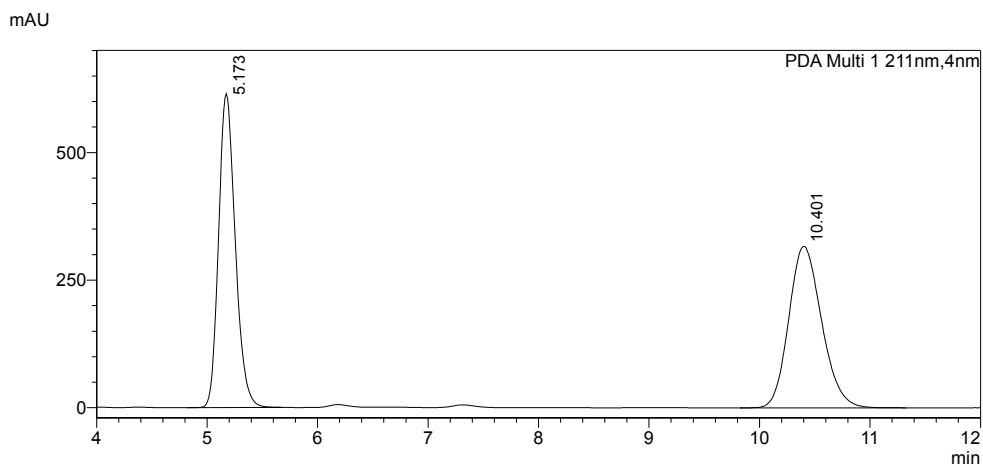

**<Peak Table>**

PDA Ch1 211nm

| Peak# | Ret. Time | Area%   |
|-------|-----------|---------|
| 1     | 5.173     | 49.633  |
| 2     | 10.401    | 50.367  |
| Total |           | 100.000 |

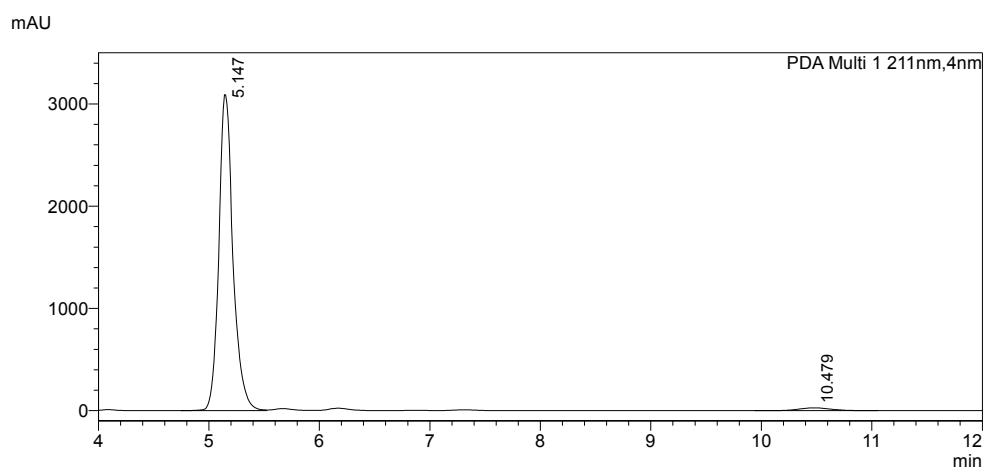

**<Peak Table>**

PDA Ch1 211nm

| Peak# | Ret. Time | Area%   |
|-------|-----------|---------|
| 1     | 5.147     | 98.032  |
| 2     | 10.479    | 1.968   |
| Total |           | 100.000 |

5.25. *iso*-Propyl (2*R*)-2-((4*R*)-4-Hydroxy-3-methyl-5-oxy-1-phenyl-4,5-dihydro-1*H*-pyrazol-4-yl)-2-phenylacetate **40**

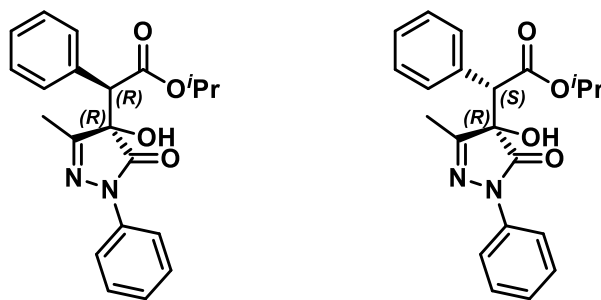

**With 20 mol% DMAP:** To a Schlenk tube was added 3-methyl-1-phenylpyrazol-4,5-dione (47.1 mg, 0.25 mmol), phenylacetic anhydride (95.5 mg, 0.375 mmol) and (2*R*,3*S*)-HyperBTM (3.9 mg, 1.25  $\mu$ mol). EtOAc (6.0 ml, 0.04 M) was added at 0 °C followed by *i*Pr<sub>2</sub>NEt (54  $\mu$ l, 0.313 mmol). The reaction was stirred at 0 °C for 3 h. *i*PrOH (7.5 ml) and DMAP (6.1 mg, 50.0  $\mu$ mol) were added and the mixture was left to be stirred at room temperature for 16 h. The solution was diluted with EtOAc and washed with 1 M aq. HCl twice, aq. sat. NaHCO<sub>3</sub> twice and brine. The organic layer was dried over MgSO<sub>4</sub>, filtered, and concentrated under reduced pressure. The residue (94:6 d.r.) was further purified by flash column chromatography (Hexanes:EtOAc 47.5:2.5  $\rightarrow$  45:5  $\rightarrow$  40:10  $\rightarrow$  35:15  $\rightarrow$  25:25) to give the title compound as sole diastereomer as an amorphous brown solid (37.2 mg, 0.102 mmol, 41%).

**With 3 mol% DMAP:** To a Schlenk tube was added 3-methyl-1-phenylpyrazol-4,5-dione (47.1 mg, 0.25 mmol), phenylacetic anhydride (95.5 mg, 0.375 mmol) and (2*R*,3*S*)-HyperBTM (3.9 mg, 1.25  $\mu$ mol). EtOAc (6.0 ml, 0.04 M) was added at 0 °C followed by *i*Pr<sub>2</sub>NEt (54  $\mu$ l, 0.313 mmol). The reaction was stirred at 0 °C for 3 h. *i*PrOH (7.5 ml) and DMAP (1.0 mg, 8.0  $\mu$ mol) were added and the mixture was left to be stirred at room temperature for 16 h. The solution was diluted with EtOAc and washed with 1 M aq. HCl twice, aq. sat. NaHCO<sub>3</sub> twice and brine. The organic layer was dried over MgSO<sub>4</sub>, filtered, and concentrated under reduced pressure. The residue (98:2 d.r.) was further purified by flash column chromatography (Hexanes:EtOAc 47.5:2.5  $\rightarrow$  45:5  $\rightarrow$  40:10  $\rightarrow$  35:15  $\rightarrow$  25:25) to give the title compound as sole diastereomer as an amorphous brown solid (37.5 mg, 0.102 mmol, 41%).

**With 0.5 mol% DMAP:** To a Schlenk tube was added 3-methyl-1-phenylpyrazol-4,5-dione (47.1 mg, 0.25 mmol), phenylacetic anhydride (95.5 mg, 0.375 mmol) and (2*R*,3*S*)-HyperBTM (3.9 mg, 1.25  $\mu$ mol). EtOAc (6.0 ml, 0.04 M) was added at 0 °C followed by *i*Pr<sub>2</sub>NEt (54  $\mu$ l, 0.313 mmol). The reaction was stirred at 0 °C for 3 h. *i*PrOH (7.5 ml) and DMAP (0.1 M stock in EtOAc, 12  $\mu$ l, 1.3  $\mu$ mol) were added and the mixture was left to be stirred at room temperature for 16 h. The solution was diluted with EtOAc and washed with 1 M aq. HCl twice, aq. sat.

NaHCO<sub>3</sub> twice and brine. The organic layer was dried over MgSO<sub>4</sub>, filtered, and concentrated under reduced pressure. The residue (93:7 d.r.) was further purified by flash column chromatography (Hexanes:EtOAc 47.5:2.5 → 45:5 → 40:10 → 35:15 → 25:25) to give the title compound as sole diastereomer as an amorphous brown solid (44.1 mg, 0.120 mmol, 48%).

$\alpha_D^{20} = +1.01$  (c 1.8 in CHCl<sub>3</sub>) @ 60% ee; **HPLC Analysis:** CHIRALPAK® AD-H (5% *i*PrOH in hexanes, flow rate 2 ml·min<sup>-1</sup>, 254 nm, 30 °C) *t<sub>R</sub>* (2*R*,4*R*)-**40**: 7.4 min, *t<sub>R</sub>* (2*S*,4*S*)-**40**: 12.8min, 80:20 e.r. (20 mol% DMAP), 88:12 e.r. (3 mol% DMAP), 97:3 e.r. (0.5 mol% DMAP); **IR**  $\nu_{\max}$  (film) 3377 (br), 3063 (w), 3034 (w), 2982 (m), 2934 (w), 1721 (s), 1697 (s), 1597 (s), 1501 (s), 1456 (m), 1364 (s), 1315 (m), 1196 (s), 1173 (s), 1128 (w), 1101 (s), 1032 (w), 1005 (w), 986 (m), 905 (s), 833 (m), 750 (s); **<sup>1</sup>H NMR** (400 MHz, CDCl<sub>3</sub>)  $\delta_H$  1.16 (3H, d, <sup>3</sup>*J*<sub>HH</sub> = 6.3 Hz, CH(CH<sub>3</sub>)<sub>a</sub>(CH<sub>3</sub>)<sub>b</sub>), 1.30 (3H, d, <sup>3</sup>*J*<sub>HH</sub> = 6.3 Hz, CH(CH<sub>3</sub>)<sub>a</sub>(CH<sub>3</sub>)<sub>b</sub>), 1.89 (3H, s, N=C-CH<sub>3</sub>), 3.95 (1H, s, CH-Ph), 4.95 – 5.00 (1H, m, OH), 5.13 (1H, app hept, <sup>3</sup>*J*<sub>HH</sub> = 6.3 Hz, CH(CH<sub>3</sub>)<sub>2</sub>), 7.13 – 7.20 (1H, m, N-PhC<sup>4</sup>H), 7.29 – 7.43 (7H, m, N-PhC<sup>3,5</sup>H, CH-PhC<sup>2,3,4,5,6</sup>H), 7.68 – 7.74 (2H, m, N-PhC<sup>2,6</sup>H); **<sup>13</sup>C{<sup>1</sup>H} NMR** (100 MHz, CDCl<sub>3</sub>)  $\delta_C$  14.9 (N=C-CH<sub>3</sub>), 21.5 (CH(CH<sub>3</sub>)<sub>a</sub>(CH<sub>3</sub>)<sub>b</sub>), 21.8 (CH(CH<sub>3</sub>)<sub>a</sub>(CH<sub>3</sub>)<sub>b</sub>), 55.2 (CH-Ph), 70.2 (CH(CH<sub>3</sub>)<sub>2</sub>), 80.3 (C-OH), 119.1 (N-PhC<sup>2,6</sup>H), 125.4 (N-PhC<sup>4</sup>H), 128.8 (CH-PhC<sup>3,5</sup>H), 128.8<sub>9</sub> (CH-PhC<sup>4</sup>H), 128.9<sub>2</sub>(N-PhC<sup>3,5</sup>H), 129.6 (CH-PhC<sup>2,6</sup>H), 131.5 (CH-PhC<sup>1</sup>), 137.5 (N-PhC<sup>1</sup>), 159.7 (C=N), 171.1 (C(O)*O*Pr), 171.6 (C(O)NPh); ***m/z*** (ESI<sup>+</sup>) 389 ([M+Na]<sup>+</sup> 55%), 405 ([M+K]<sup>+</sup> 15%), 755 ([2M+Na]<sup>+</sup> 100%), 756 ([2M(<sup>13</sup>C)+Na]<sup>+</sup> 49%), 757 ([2M(<sup>13</sup>C<sub>2</sub>)+Na]<sup>+</sup> 15%), 771 ([2M+K]<sup>+</sup> 15%); **HRMS** (ESI<sup>+</sup>) C<sub>21</sub>H<sub>22</sub>N<sub>2</sub>O<sub>4</sub> [M+Na]<sup>+</sup> found 389.1475, requires 389.1472 (0.7 ppm).

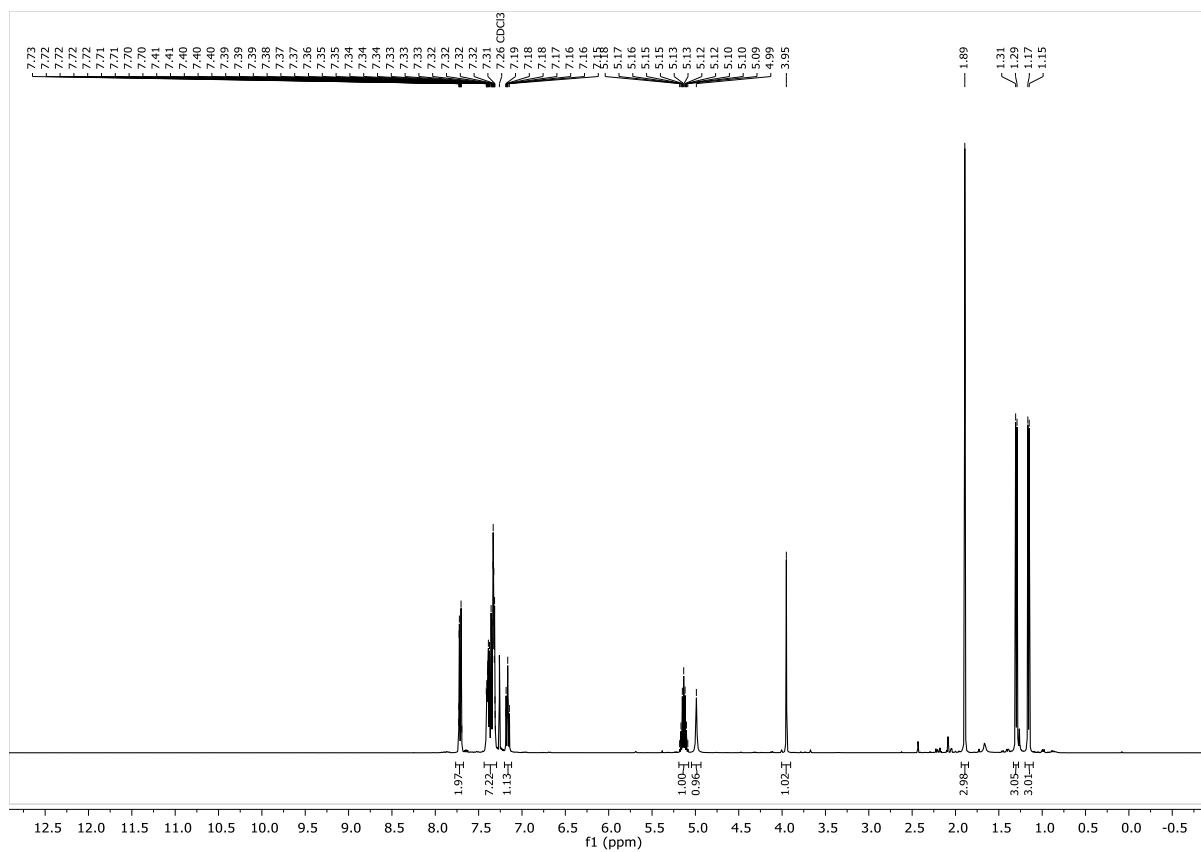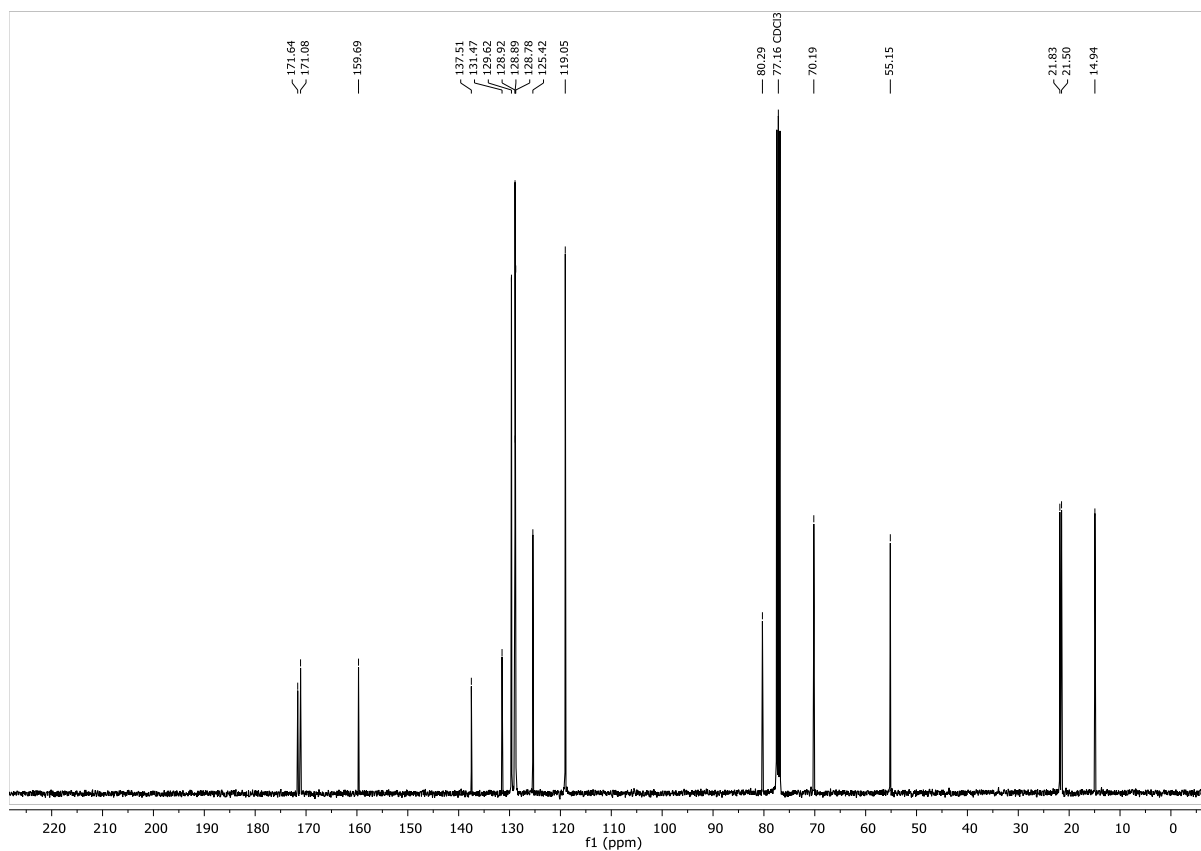

mAU

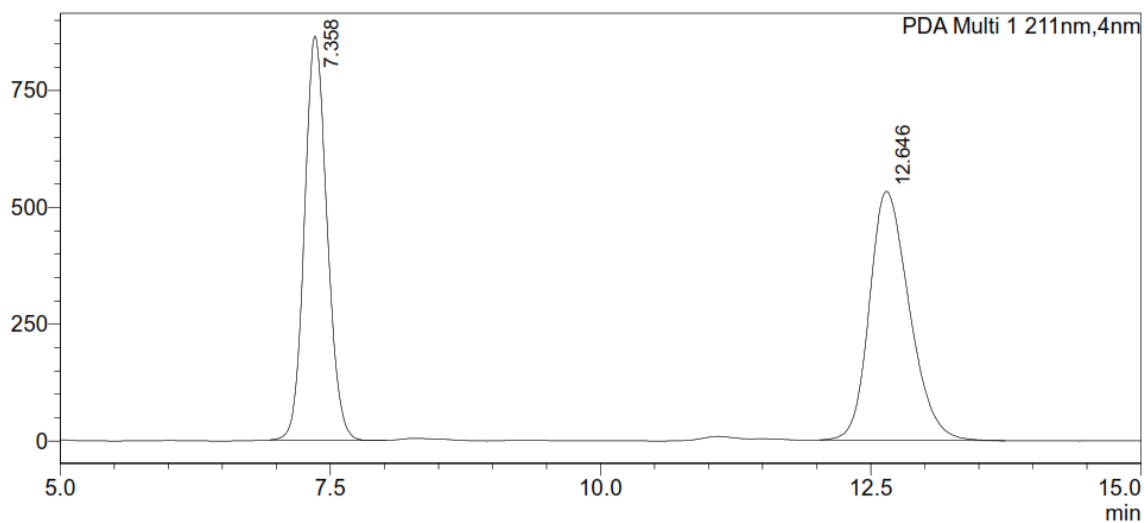

**<Peak Table>**

PDA Ch1 211nm

| Peak# | Ret. Time | Area%   |
|-------|-----------|---------|
| 1     | 7.358     | 47.862  |
| 2     | 12.646    | 52.138  |
| Total |           | 100.000 |

mAU

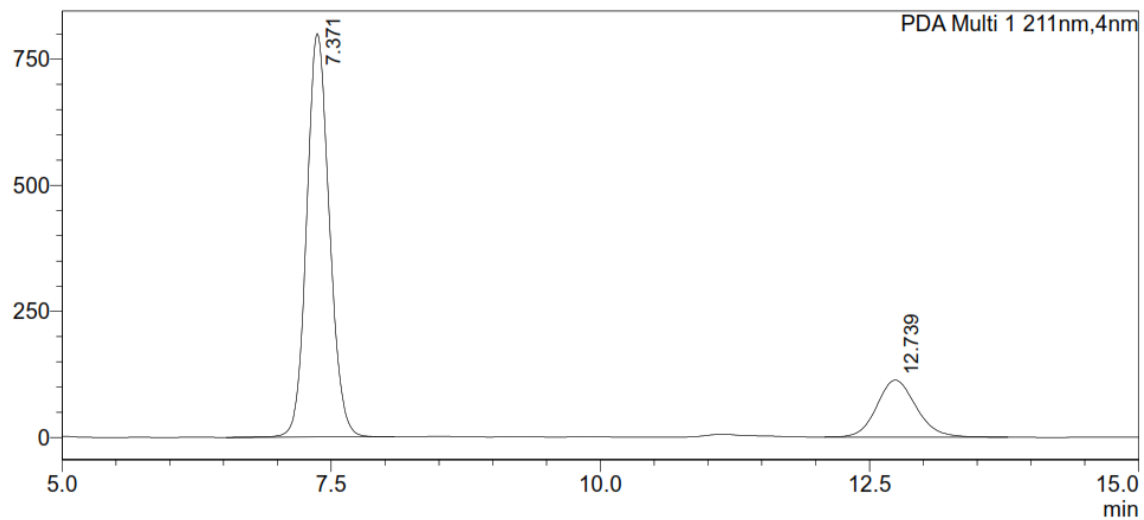

**<Peak Table>**

PDA Ch1 211nm

| Peak# | Ret. Time | Area%   |
|-------|-----------|---------|
| 1     | 7.371     | 80.249  |
| 2     | 12.739    | 19.751  |
| Total |           | 100.000 |

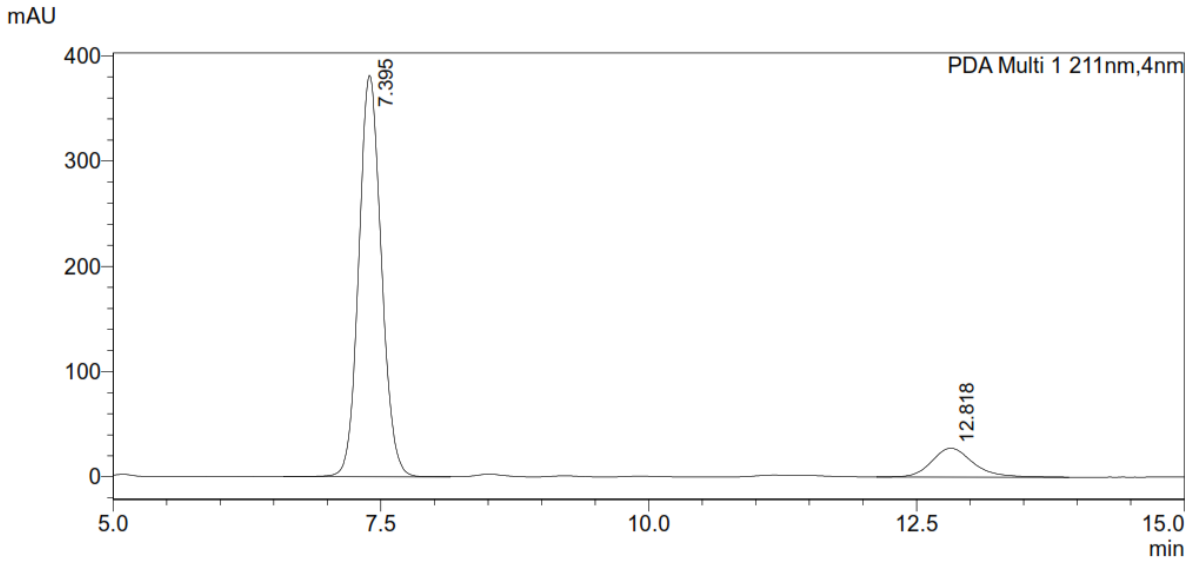

**<Peak Table>**

PDA Ch1 211nm

| Peak# | Ret. Time | Area%   |
|-------|-----------|---------|
| 1     | 7.395     | 88.284  |
| 2     | 12.818    | 11.716  |
| Total |           | 100.000 |

mAU

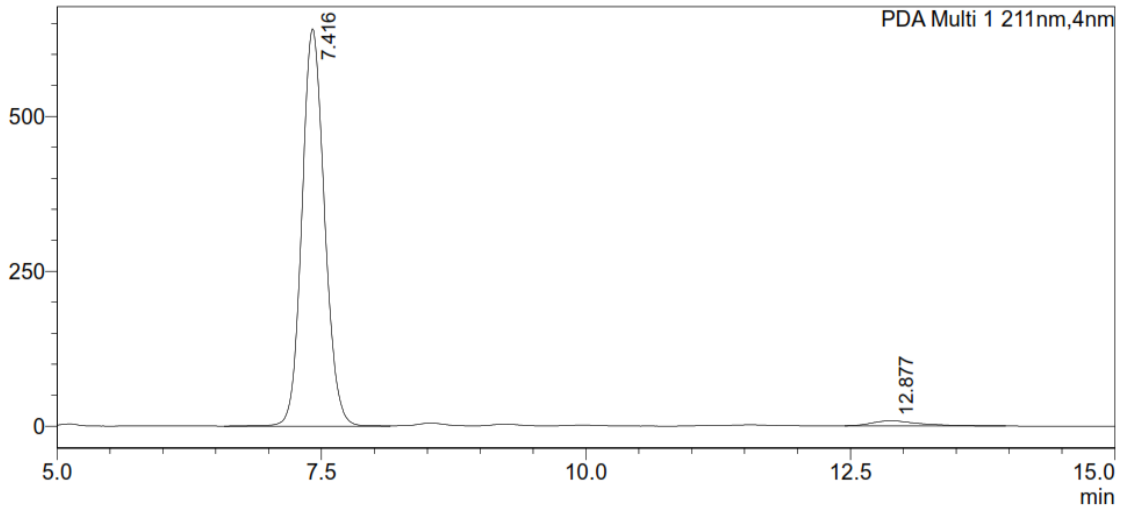

**<Peak Table>**

PDA Ch1 211nm

| Peak# | Ret. Time | Area%   |
|-------|-----------|---------|
| 1     | 7.416     | 97.365  |
| 2     | 12.877    | 2.635   |
| Total |           | 100.000 |

5.26. (1'*R*,4*R*)- and (1'*S*,4*R*)-2-(4-Hydroxy-3-methyl-5-oxo-1-phenyl-4,5-dihydro-1*H*-pyrazol-4-yl)-2-(naphth-1-yl)-acetate **41**

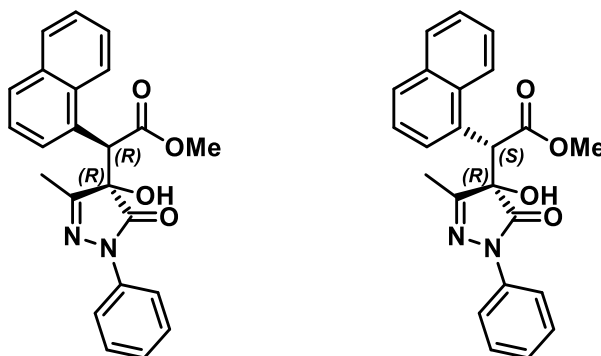

To a solution of 3-methyl-1-(naphth-1-yl)-1*H*-pyrazole-4,5-dione (47.1 mg, 0.25 mmol), 2-(naphth-1-yl)acetic anhydride (132.9 mg, 0.375 mmol) and (2*R*,3*S*)-HyperBTM (3.9 mg, 0.125 mmol) were dissolved in ethyl acetate (6 ml, 0.04 M) at 0 °C. Diisopropylethylamine (54 µl, 0.31 mmol) was added and the reaction mixture was stirred at 0 °C for 3 h. DMAP (6.1 mg, 0.05 mmol) and methanol (4.0 ml) were added and the reaction mixture was stirred for 16 h at rt. The reaction mixture was diluted with ethyl acetate and washed sequentially with 1 M aq. HCl (×2), sat. aq. NaHCO<sub>3</sub> (×2), and brine (×1). The organic layer was dried over MgSO<sub>4</sub>, filtered, and concentrated *in vacuo*. Purification by column chromatography (*n*-hexane : ethyl acetate 4:1 to 1:1) gave major and minor diastereomers (55.2 mg, 57%, >95:5 dr) as an inseparable mixture as a white amorphous solid.  $[\alpha]_D^{20} +187.0$  (*c* 0.27, CHCl<sub>3</sub>); IR  $\nu_{\max}$  (film) 3395 (O-H), 3061, 2953 (C-H), 1717 (C=O), 1595, 1501, 1360, 1198, 1165, 978, 783; **HRMS** (ESI<sup>+</sup>) C<sub>23</sub>H<sub>21</sub>N<sub>2</sub>O<sub>4</sub> [M+H]<sup>+</sup> found 389.1493, requires 389.14959 (−0.8 ppm). *Data for major diastereomer anti-41: HPLC Analysis:* Chiralpak AD-H (95:5 hexane:isopropanol, flow rate 2.00 ml·min<sup>−1</sup>, 211 nm, 30 °C) *t*<sub>R</sub> (2'*R*,4*R*)-**41**: 14.0 min, *t*<sub>R</sub> (2'*S*,4*S*)-**41**: 30.6 min, 95.5:4.5 er; **<sup>1</sup>H NMR** (500 MHz, CDCl<sub>3</sub>)  $\delta_H$ : 1.45 (3H, s, C(3)CH<sub>3</sub>), 3.76 (3H, s, OCH<sub>3</sub>), 4.87 (1H, s, C(2')H), 5.45 (1H, br s, OH), 7.19 (1H, t, *J*<sub>HH</sub> 7.4, NArC(4)H), 7.38 (2H, app t, *J*<sub>HH</sub> 8.0, NAr(3,5)H), 7.48-7.56 (2H, m, C(2')HArC(4)H + C(2')HArC(7)H), 7.56-7.61 (1H, m, C(2')HArC(3)H), 7.76 (2H, d, *J*<sub>HH</sub> 7.9, NArC(2,6)H), 7.84-7.92 (2H, m, C(2')HArC(6)H + C(2')HArC(5)H), 7.96 (1H, d, *J*<sub>HH</sub> 7.2, C(2')HArC(8)H), 7.99 (1H, d, *J*<sub>HH</sub> 8.5, C(2')HArC(2)H); **<sup>13</sup>C{<sup>1</sup>H} NMR** (126 MHz, CDCl<sub>3</sub>)  $\delta_C$ : 14.7 (C(3)CH<sub>3</sub>), 46.7 (C(2')H), 53.1 (OCH<sub>3</sub>), 80.1 (C(4)=O), 119.0 (NArC(2,6)H), 122.3 (C(2')HArC(2)H), 125.3 (NArC(4)H), 125.5 (C(2')HArC(4)H), 126.2 (C(2')HArC(7)H), 127.3 (C(2')HArC(8a)), 127.4 (C(2')HArC(3)H), 127.6 (C(2')HArC(8)H), 129.0 (NArC(3,5)H), 129.4 (C(2')HArC(5)H), 129.7 (C(2')HArC(6)H), 131.9 (C(2')HArC(1)), 134.0 (C(2')HArC(4a)), 137.6 (NArC(1)), 159.7 (C(3)=N), 172.2 (C(5)=O), 172.7 (C(1')=O); *Data for minor diastereomer syn-41: HPLC Analysis:* Chiralpak AD-H (95:5 hexane:isopropanol, flow rate 2.00 ml·min<sup>−1</sup>, 211 nm, 30 °C) *t*<sub>R</sub> (2'*S*,4*R*)-**41**: 17.3

min,  $t_R$  (2'R,4S)-**41**: 23.4 min, 93.5:6.5 er;  $^1\text{H NMR}$  (500 MHz,  $\text{CDCl}_3$ ) (*selected*)  $\delta_{\text{H}}$ : 1.88 (3H, s, C(3) $\text{CH}_3$ ), 3.80 (3H, s,  $\text{OCH}_3$ ), 5.03 (1H, s, C(2')H);  $^{13}\text{C}\{^1\text{H}\}$  NMR (126 MHz,  $\text{CDCl}_3$ ) (*selected*)  $\delta_{\text{C}}$ : 13.7 (C(3) $\text{CH}_3$ ), 53.4 ( $\text{OCH}_3$ ), 119.2 (NArC(2,6)H).

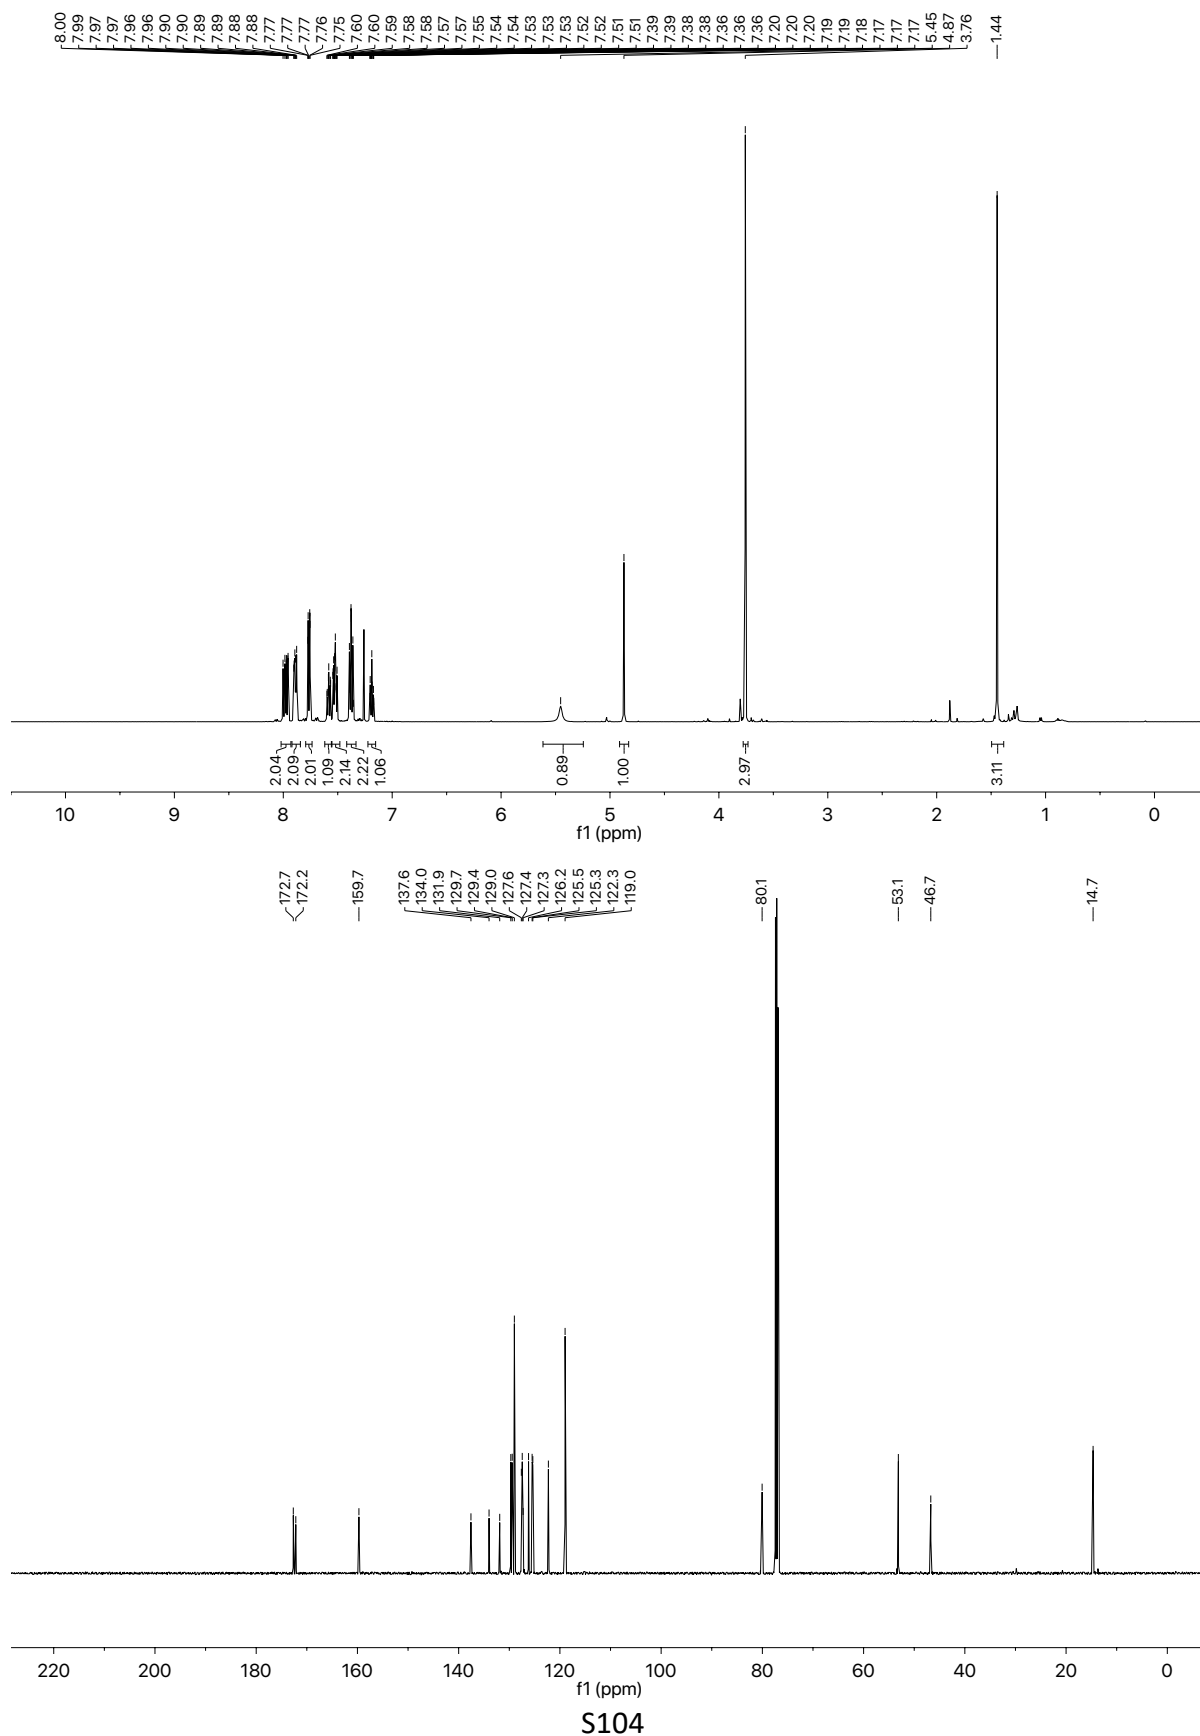



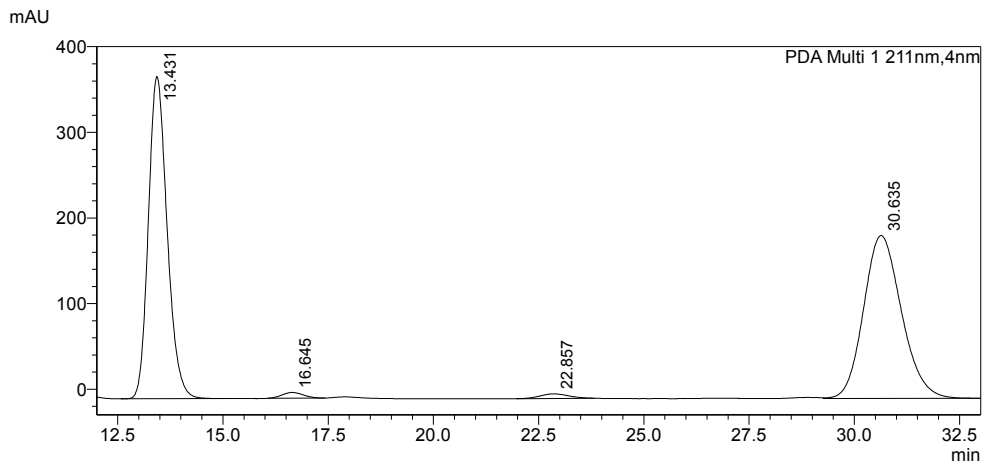

**<Peak Table>**

| PDA Ch1 211nm |           |         |
|---------------|-----------|---------|
| Peak#         | Ret. Time | Area%   |
| 1             | 13.431    | 48.492  |
| 2             | 16.645    | 0.980   |
| 3             | 22.857    | 1.048   |
| 4             | 30.635    | 49.480  |
| Total         |           | 100.000 |

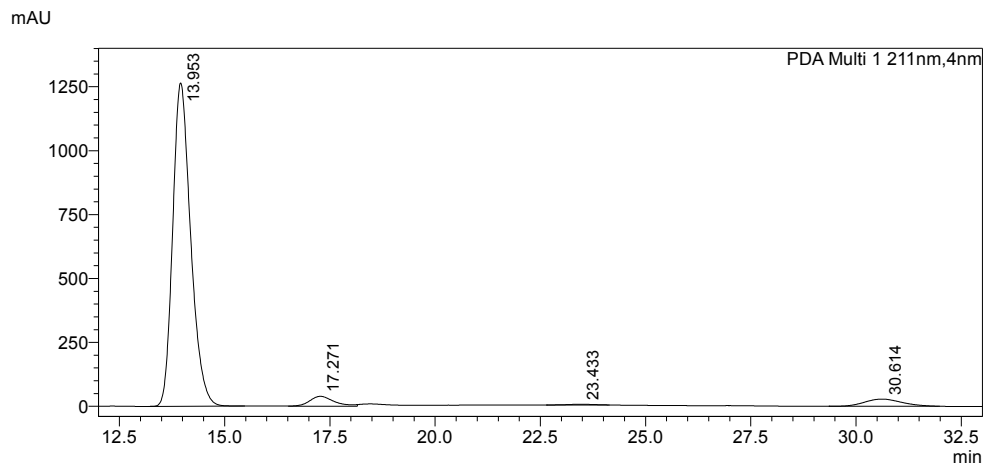

**<Peak Table>**

| PDA Ch1 211nm |           |         |
|---------------|-----------|---------|
| Peak#         | Ret. Time | Area%   |
| 1             | 13.953    | 91.666  |
| 2             | 17.271    | 3.818   |
| 3             | 23.433    | 0.273   |
| 4             | 30.614    | 4.243   |
| Total         |           | 100.000 |

5.27. Pentamethylene (2*R*)-2-((4*R*)-4-Hydroxy-3-methyl-5-oxy-1-phenyl-4,5-dihydro-1*H*-pyrazol-4-yl)-2-phenylacetamide **42**

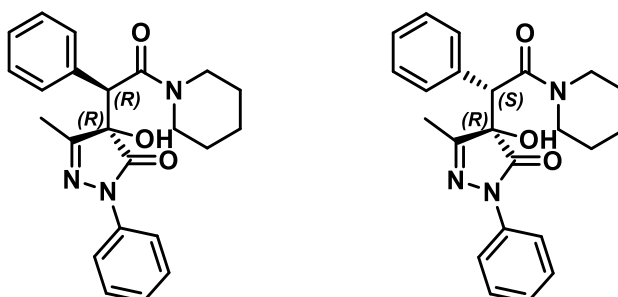

To a Schlenk tube was added 3-methyl-1-phenylpyrazol-4,5-dione (47.1 mg, 0.25 mmol), phenylacetic anhydride (95.5 mg, 0.375 mmol) and (2*R*,3*S*)-HyperBTM (3.9 mg, 1.25  $\mu$ mol). EtOAc (6.0 ml, 0.04 M) was added at 0 °C followed by *i*Pr<sub>2</sub>NEt (54  $\mu$ l, 0.313 mmol). The reaction was stirred at 0 °C for 3 h. Piperidine (74  $\mu$ l, 0.750 mmol) were added and the mixture was left to be stirred at room temperature for 16 h. The solution was diluted with EtOAc and washed with 1 M aq. HCl twice, aq. sat. NaHCO<sub>3</sub> twice and brine. The organic layer was dried over MgSO<sub>4</sub>, filtered, and concentrated under reduced pressure. The residue (92:8 d.r.) was further purified by flash column chromatography (3/5 Enzo, Hexanes:EtOAc 47.5:2.5  $\rightarrow$  45:5  $\rightarrow$  40:10  $\rightarrow$  35:15  $\rightarrow$  25:25) to give the title compound as sole diastereomer as an amorphous brown solid (66.8 mg, 0.171 mmol, 68%). Characterisation data analysed as 90:10 mixture of diastereomers:  $\alpha_D^{20} = +1.83$  (*c* 3.9 in CDCl<sub>3</sub>) @ 90:10 d.r., 99:1 and 98:2 e.r.; **HPLC Analysis:** CHIRALPAK® AD-H (5% *i*PrOH in hexanes, flow rate 1 ml·min<sup>-1</sup>, 254 nm, 30 °C) *t<sub>R</sub>* (2*S*,4*S*)-**42**: 15.1 min, *t<sub>R</sub>* (2*R*,4*R*)-**42**: 16.9 min, 1:99 e.r. major diastereomer, *t<sub>R</sub>* (2*S*,4*R*)-**42**: 24.7 min, *t<sub>R</sub>* minor (2*R*,4*S*)-**42**: 16.9 min, 2:98 e.r. minor diastereomer; **IR**  $\nu_{\max}$  (film) 3370 (br), 3063 (w), 3030 (w), 2938 (m), 2857 (w), 1717 (s), 1614 (s), 1597 (s), 1499 (s), 1445 (s), 1362 (s), 1314 (w), 1246 (m), 1225 (m), 1190 (w), 1126 (m), 1064 (w), 1024 (m), 908 (m); **<sup>1</sup>H NMR** (400 MHz, CDCl<sub>3</sub>)  $\delta$ <sub>H</sub> 0.80 – 0.95 (0.1H, m, N(CH<sub>2</sub>CH<sub>2</sub>)<sub>2</sub>CH<sub>a</sub>H<sub>b</sub>), 0.96 (0.9H, app dtt, <sup>2</sup>*J*<sub>HH</sub> = 13.4 Hz, <sup>3</sup>*J*<sub>HH</sub> = 7.9 Hz, 4.3 Hz, N(CH<sub>2</sub>CH<sub>2</sub>)<sub>2</sub>CH<sub>a</sub>H<sub>b</sub>), 1.35 (1.0H, app dtt (minor obscured), <sup>2</sup>*J*<sub>HH</sub> = 13.4 Hz, <sup>3</sup>*J*<sub>HH</sub> = 7.0 Hz, 3.7 Hz, N(CH<sub>2</sub>CH<sub>2</sub>)<sub>2</sub>CH<sub>a</sub>H<sub>b</sub>), 1.40 – 1.68 (4.0H, m, N(CH<sub>2</sub>CH<sub>2</sub>)<sub>2</sub>CH<sub>2</sub>), 1.91 (2.7H, s, N=C-CH<sub>3</sub>), 2.06 (0.3H, s, N=CH<sub>3</sub>), 3.15 (1.0H, ddd (minor obscured), <sup>2</sup>*J*<sub>HH</sub> = 13.5 Hz, <sup>3</sup>*J*<sub>HH</sub> = 6.8 Hz, 3.9 Hz, N(CH<sub>a</sub>H<sub>b</sub>)<sub>a</sub>(CH<sub>2</sub>)<sub>b</sub>), 3.22 (1.0H, ddd (minor obscured), <sup>2</sup>*J*<sub>HH</sub> = 13.5 Hz, <sup>3</sup>*J*<sub>HH</sub> = 6.8 Hz, 3.9 Hz, N(CH<sub>a</sub>H<sub>b</sub>)<sub>a</sub>(CH<sub>2</sub>)<sub>b</sub>), 3.38 (0.1H, ddd, <sup>2</sup>*J*<sub>HH</sub> = 12.9 Hz, <sup>3</sup>*J*<sub>HH</sub> = 8.5 Hz, 2.5 Hz, N(CH<sub>2</sub>)<sub>a</sub>(CH<sub>a</sub>H<sub>b</sub>)<sub>b</sub>), 3.52 (0.9H, ddd, <sup>2</sup>*J*<sub>HH</sub> = 12.9 Hz, <sup>3</sup>*J*<sub>HH</sub> = 7.7 Hz, 3.4 Hz, N(CH<sub>2</sub>)<sub>a</sub>(CH<sub>a</sub>H<sub>b</sub>)<sub>b</sub>), 3.71 (1.0H, ddd (minor obscured), <sup>2</sup>*J*<sub>HH</sub> = 12.9 Hz, <sup>3</sup>*J*<sub>HH</sub> = 7.7 Hz, 3.4 Hz, N(CH<sub>2</sub>)<sub>a</sub>(CH<sub>a</sub>H<sub>b</sub>)<sub>b</sub>), 4.08 (0.1H, s, CH-Ph), 4.23 (0.9H, s, CH-Ph), 6.10 (0.1H, s, OH), 6.75 (0.9H, s, OH), 7.09 – 7.18 (1H, m, N-PhC<sup>4</sup>H), 7.26 –

7.38 (7.0H, m, N-PhC<sup>3,5</sup>H, CH-PhC<sup>2,3,4,5,6</sup>H), 7.69 – 7.76 (2.0H, N-PhC<sup>2,6</sup>H); <sup>13</sup>C{<sup>1</sup>H} NMR (100 MHz, CDCl<sub>3</sub>) δ<sub>c</sub> 14.8 (N=C-CH<sub>3</sub>, minor), 15.6 (N=C-CH<sub>3</sub>, major), 24.3 (N(CH<sub>2</sub>CH<sub>2</sub>)<sub>a</sub>(CH<sub>2</sub>CH<sub>2</sub>)<sub>b</sub>), 25.4<sub>5</sub> (N(CH<sub>2</sub>CH<sub>2</sub>)<sub>a</sub>(CH<sub>2</sub>CH<sub>2</sub>)<sub>b</sub>, minor), 25.4<sub>9</sub> (N(CH<sub>2</sub>CH<sub>2</sub>)<sub>a</sub>(CH<sub>2</sub>CH<sub>2</sub>)<sub>b</sub>, major), 25.7 (N(CH<sub>2</sub>CH<sub>2</sub>)<sub>2</sub>CH), 43.2 (N(CH<sub>2</sub>CH<sub>2</sub>)<sub>a</sub>(CH<sub>2</sub>CH<sub>2</sub>)<sub>b</sub>, minor), 43.3 (N(CH<sub>2</sub>CH<sub>2</sub>)<sub>a</sub>(CH<sub>2</sub>CH<sub>2</sub>)<sub>b</sub>, major), 47.2<sub>1</sub> (N(CH<sub>2</sub>CH<sub>2</sub>)<sub>a</sub>(CH<sub>2</sub>CH<sub>2</sub>)<sub>b</sub>, minor), 47.2<sub>4</sub> (N(CH<sub>2</sub>CH<sub>2</sub>)<sub>a</sub>(CH<sub>2</sub>CH<sub>2</sub>)<sub>b</sub>, major), 52.0 (CH-Ph, minor), 52.2 (CH-Ph, major), 80.7 (C-OH, minor), 81.9 (C-OH, major), 118.9 (N-PhC<sup>2,6</sup>H, minor), 119.1 (N-PhC<sup>2,6</sup>H, major), 124.9 (N-PhC<sup>4</sup>H, minor), 125.3 (N-PhC<sup>4</sup>H, major), 128.4 (CH-PhC<sub>4</sub>H, minor), 128.7 (CH-PhC<sup>4</sup>H, major), 128.8 (N-PhC<sup>3,5</sup>H, major), 128.9 (CH-PhC<sup>3,5</sup>H, major), 129.1 (CH-PhC<sup>2,6</sup>H, major), 129.8 (N-PhC<sup>3,5</sup>H, minor), 132.1 (CH-PhC<sup>1</sup>, minor), 132.5 (CH-PhC<sup>1</sup>, major), 137.6 (N-PhC<sup>1</sup>, major), 137.9 (N-PhC<sup>1</sup>, minor), 160.9 (N=C, minor), 161.0 (N=C, major), 169.1 (CH-C(O)O, minor), 169.7 (CH-C(O)O, major), 170.8 (C(O)N, minor), 172.0 (C(O)N, major), not all signals of the minor diastereomer could be resolved; *m/z* (ESI<sup>+</sup>) 414 ([M+Na]<sup>+</sup> 100%), 415 ([M(<sup>13</sup>C)+Na]<sup>+</sup> 28%), 416 ([M(<sup>13</sup>C<sub>2</sub>)+Na]<sup>+</sup> 4%), 805 ([2M+Na]<sup>+</sup> 69%), 806 ([2M(<sup>13</sup>C)+Na]<sup>+</sup> 35%), 807 (2[M(<sup>13</sup>C<sub>2</sub>)+Na]<sup>+</sup> 10%); **HRMS** (ESI<sup>+</sup>) C<sub>23</sub>H<sub>25</sub>N<sub>3</sub>O<sub>3</sub> [M+Na]<sup>+</sup> found 414.1795, requires 414.1788 (1.6 ppm)

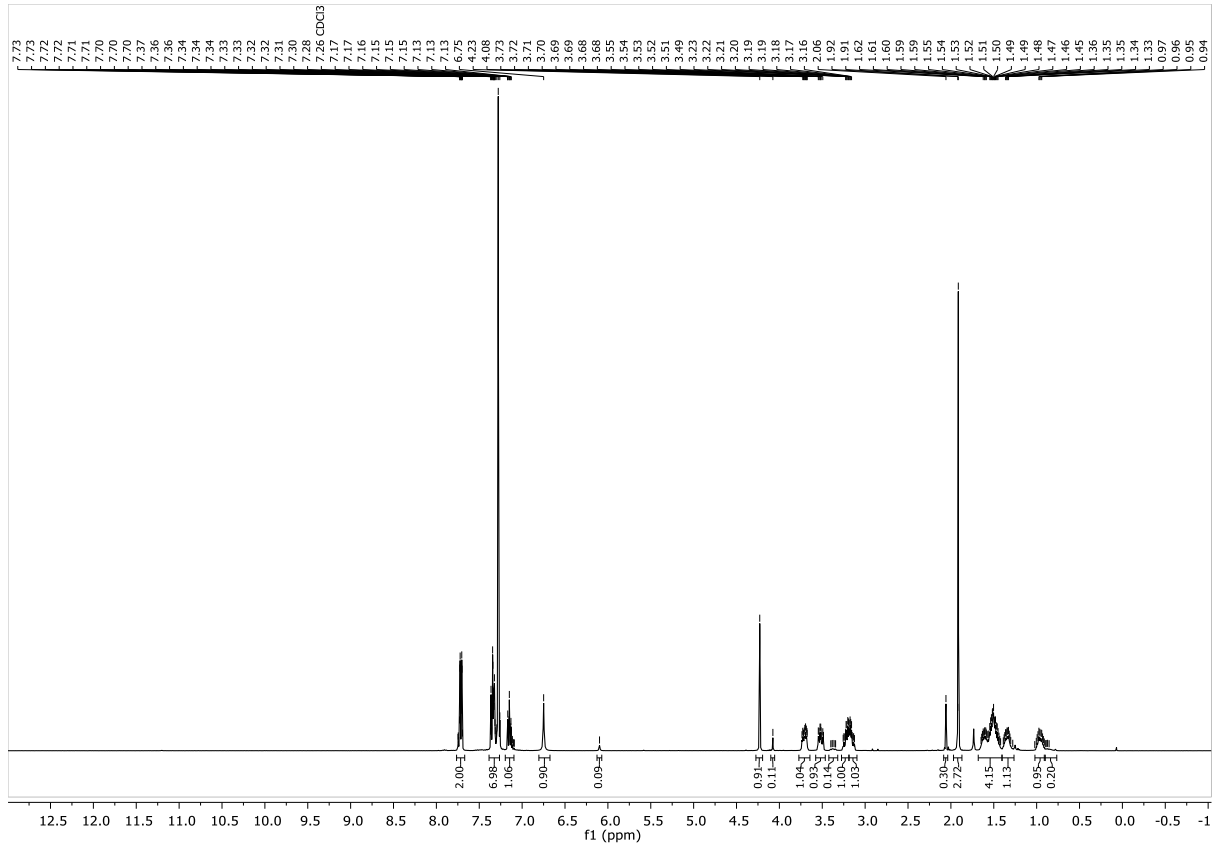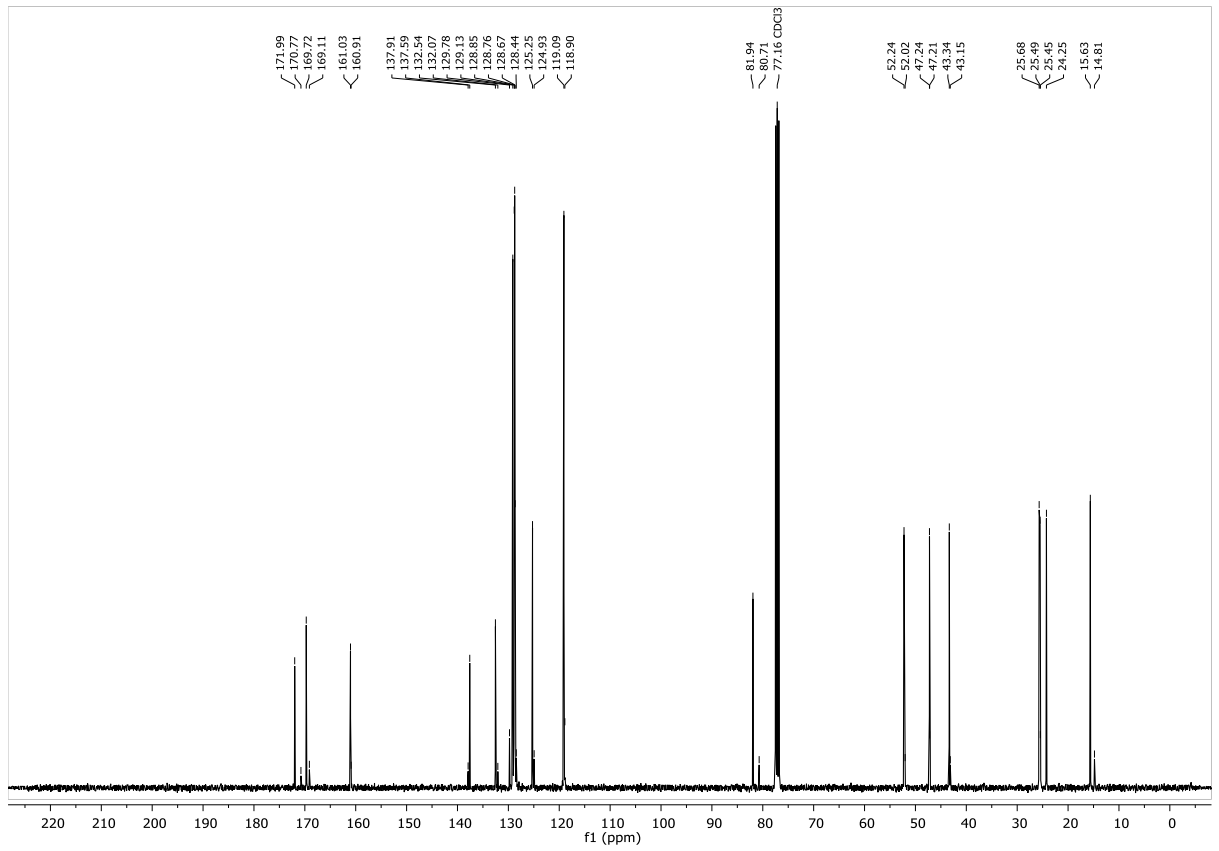

mAU

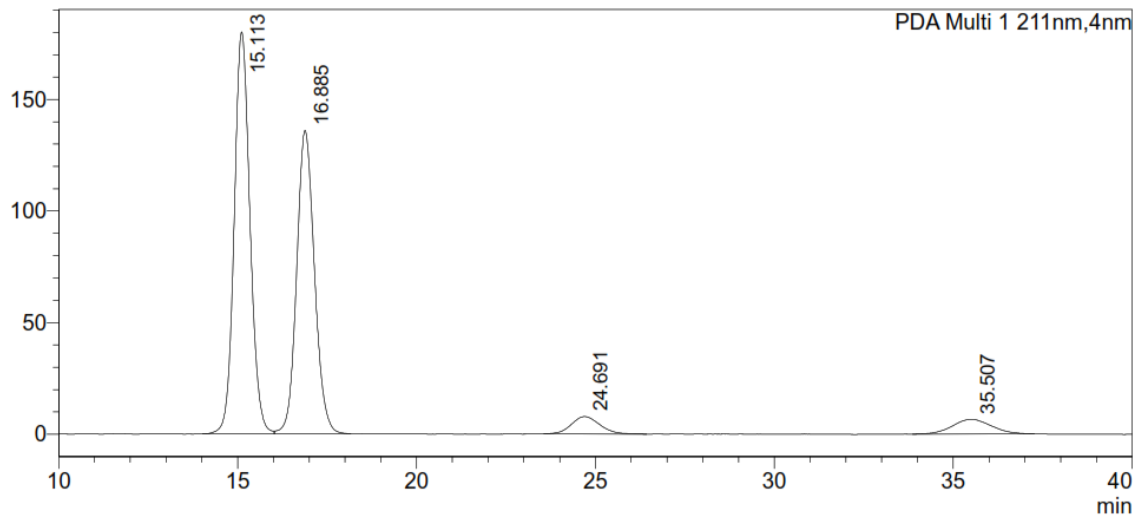

<Peak Table>

PDA Ch1 211nm

| Peak# | Ret. Time | Area%   |
|-------|-----------|---------|
| 1     | 15.113    | 49.444  |
| 2     | 16.885    | 42.090  |
| 3     | 24.691    | 3.935   |
| 4     | 35.507    | 4.530   |
| Total |           | 100.000 |

mAU

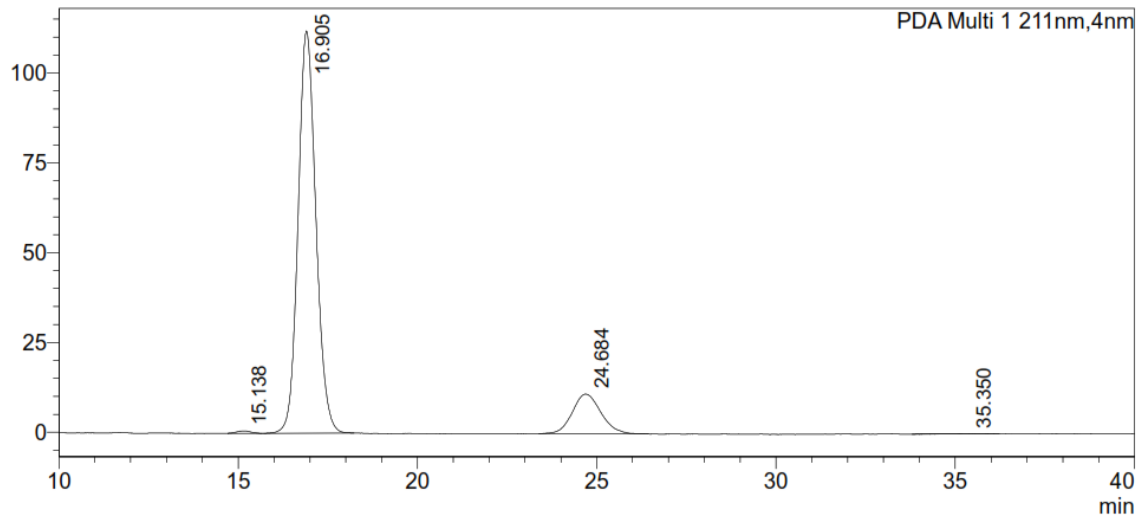

<Peak Table>

PDA Ch1 211nm

| Peak# | Ret. Time | Area%   |
|-------|-----------|---------|
| 1     | 15.138    | 0.408   |
| 2     | 16.905    | 85.795  |
| 3     | 24.684    | 13.722  |
| 4     | 35.350    | 0.074   |
| Total |           | 100.000 |

5.28. (4*R*)-4-((1*R*)-2-oxo-1-phenyl-2-(4-*tert*-butyloxycarbonylpiperazin-1-yl)ethyl)-4-hydroxy-3-methyl-1-phenylpyrazoline-5-one **43**

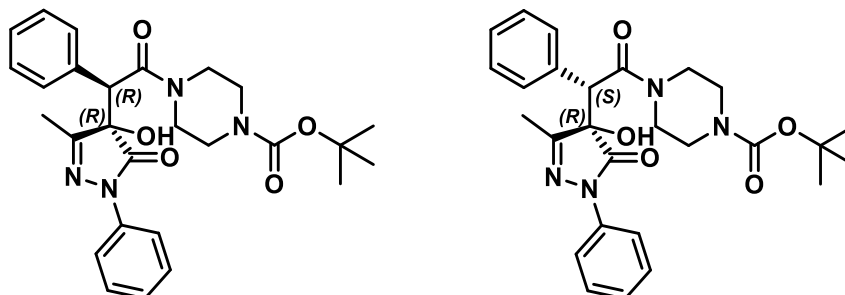

To a Schlenk tube was added 3-methyl-1-phenylpyrazol-4,5-dione (47.1 mg, 0.25 mmol), phenylacetic anhydride (95.5 mg, 0.375 mmol) and (2*R*,3*S*)-HyperBTM (3.9 mg, 1.25  $\mu$ mol). EtOAc (6.0 ml, 0.04 M) was added at 0 °C followed by *i*Pr<sub>2</sub>NEt (54  $\mu$ l, 0.313 mmol). The reaction was stirred at 0 °C for 3 h. *N*-*tert*-Butyloxycarbonylpiperazine (139.8 mg, 0.750 mmol) were added and the mixture was left to be stirred at room temperature for 16 h. The precipitate (*N*-*tert*-butyloxycarbonyl-*N'*-phenacylpiperazine) was filtered off, the filtrate was diluted with EtOAc and washed with 1 M aq. HCl twice, aq. sat. NaHCO<sub>3</sub> twice and brine. The organic layer was dried over MgSO<sub>4</sub>, filtered, and concentrated under reduced pressure. The residue (93:7 d.r.) was further purified by flash column chromatography (3/5 Enzo, Hexanes:EtOAc 40:10  $\rightarrow$  30:20  $\rightarrow$  20:30) to give the title compound as a 90:10 mixture of diastereomers as an amorphous brown solid (81.7 mg, 0.166 mmol, 66%). Characterisation data analysed as 90:10 mixture of diastereomers:  $\alpha_D^{20} = +1.17$  (*c* 4.9 in CDCl<sub>3</sub>) @ 90:10 d.r. and 99:1 e.r.; **HPLC analysis**: CHIRALPAK® AD-H (5% *i*PrOH in hexanes, flow rate 1 ml·min<sup>-1</sup>, 254 nm, 30 °C) *t*<sub>R</sub> (1*R*,4*R*)-**43**: 23.6 min, *t*<sub>R</sub> (1*S*,4*S*)-**43**: 36.4 min, >99:1 e.r. major diastereomer; *t*<sub>R</sub> (1*S*,4*R*)-**43**: 43.9 min, *t*<sub>R</sub> (1*R*,4*S*)-**43**: 48.5 min, >99:1 e.r. minor diastereomer; **IR**  $\nu_{\max}$  (film) 3353 (br), 3065 (w), 30032 (w), ,3005 (w), 2978 (m), 2926 (m), 2864 (w), 1717 (m), 1695 (s), 1624 (s), 1597 (m), 1501 (m), 1458 (m), 1418 (s), 1395 (m), 1364 (s), 1285 (m), 1250 (s), 1225 (s), 1163 (s), 1125 (s), 1092 (w), 1028 (m), 995 (m), 908 (s), 862 (m), 750 (s); **<sup>1</sup>H NMR** (400 MHz, CDCl<sub>3</sub>)  $\delta$ <sub>H</sub> 1.41 (9H, s, C(CH<sub>3</sub>)<sub>3</sub>), 1.92 (2.7H, s, N=CCH<sub>3</sub>), 1.97 (0.3H, s, N=CCH<sub>3</sub>), 2.59 – 2.70 (0.1H, m, N(CH<sub>2</sub>CH<sub>a</sub>H<sub>b</sub>)NBoc), 2.78 (0.9H, ddd, <sup>2</sup>*J*<sub>HH</sub> = 13.4 Hz, <sup>3</sup>*J*<sub>HH</sub> = 7.4 Hz, 3.3 Hz, N(CH<sub>2</sub>CH<sub>a</sub>H<sub>b</sub>)<sub>a</sub>(CH<sub>2</sub>CH<sub>2</sub>)<sub>b</sub>NBoc), 3.08 – 3.22 (0.9H, m, N(CH<sub>a</sub>H<sub>b</sub>CH<sub>2</sub>)<sub>a</sub>(CH<sub>2</sub>CH<sub>2</sub>)<sub>b</sub>NBoc), 3.22 – 3.35 (2.7H, m, N(CH<sub>a</sub>H<sub>b</sub>CH<sub>a</sub>H<sub>b</sub>)<sub>a</sub>(CH<sub>2</sub>CH<sub>a</sub>H<sub>b</sub>)<sub>b</sub>NBoc), 3.47 – 3.64 (1.8H, m, N(CH<sub>2</sub>CH<sub>2</sub>)<sub>a</sub>(CH<sub>a</sub>H<sub>b</sub>CH<sub>a</sub>H<sub>b</sub>)<sub>b</sub>NBoc), 3.75 (0.9H, ddd, <sup>2</sup>*J*<sub>HH</sub> = 14.0 Hz, <sup>3</sup>*J*<sub>HH</sub> = 6.6 Hz, 3.4 Hz, N(CH<sub>2</sub>CH<sub>2</sub>)<sub>a</sub>(CH<sub>a</sub>H<sub>b</sub>CH<sub>2</sub>)<sub>b</sub>NBoc), 4.22 (1H, s, CH-Ph), 5.28 (0.1H, s, OH), 6.41 (0.9H, s(br), OH), 7.12 (0.1H, app t, <sup>3</sup>*J*<sub>HH</sub> = 7.5 Hz, N-PhC<sup>4</sup>H), 7.16 (0.9H, app t, <sup>3</sup>*J*<sub>HH</sub> = 7.4 Hz, N-PhC<sup>4</sup>H), 7.23 – 7.34 (5H, m, CH-PhC<sup>2,3,4,5,6</sup>H), 7.35 (1.8H, dd, <sup>3</sup>*J*<sub>HH</sub> = 8.1 Hz, 7.4 Hz, N-PhC<sup>3,5</sup>H), 7.70 (1.8H, app d, <sup>3</sup>*J*<sub>HH</sub>

= 8.1 Hz, N-PhC<sup>2,6</sup>H), 7.72 (0.2H, app d, <sup>3</sup>J<sub>HH</sub> = 8.1 Hz, N-PhC<sup>2,6</sup>H), not all signals of the minor diastereomer could be resolved; <sup>13</sup>C{<sup>1</sup>H} NMR (100 MHz, CDCl<sub>3</sub>) δ<sub>c</sub> 14.8 (minor, =CCH<sub>3</sub>), 15.6 (major, =CCH<sub>3</sub>), 28.4 (major, (CH<sub>3</sub>)<sub>3</sub>), 42.0 (major, N(CH<sub>2</sub>CH<sub>2</sub>)<sub>a</sub>(CH<sub>2</sub>CH<sub>2</sub>)<sub>b</sub>NBoc), 42.7 (broad, major, N(CH<sub>2</sub>CH<sub>2</sub>)<sub>a</sub>(CH<sub>2</sub>CH<sub>2</sub>)<sub>b</sub>NBoc), 43.4 (broad, major, N(CH<sub>2</sub>CH<sub>2</sub>)<sub>a</sub>(CH<sub>2</sub>CH<sub>2</sub>)<sub>b</sub>NBoc), 46.0 (major, N(CH<sub>2</sub>CH<sub>2</sub>)<sub>a</sub>(CH<sub>2</sub>CH<sub>2</sub>)<sub>b</sub>NBoc), 52.6 (broad, major, CH-Ph), 80.6 (major, C(CH<sub>3</sub>)<sub>3</sub>), 81.7 (C-OH), 119.0 (minor, N-PhC<sup>2,6</sup>H), 119.1 (major, N-PhC<sup>2,6</sup>H), 125.1 (minor, N-PhC<sup>4</sup>H), 125.4 (major, N-PhC<sup>4</sup>H), 128.8 (major, CH-PhC<sup>2,6</sup>H), 128.9 (major, N-PhC<sup>3,5</sup>H), 129.0 (major, CH-PhC<sup>4</sup>H), 129.4 (major, CH-PhC<sup>3,5</sup>H), 129.8 (minor, PhCH), 132.1 (major, CH-PhC<sup>1</sup>), 137.5 (major, N-PhC<sup>1</sup>), 154.4 (NC(=O)O<sup>t</sup>Bu), 160.7 (N=CCH<sub>3</sub>), 170.3 (Ph-CHC(=O)N), 171.8 (Ph-NC(=O)); *m/z* (ESI<sup>+</sup>) 414 ([M-Boc+Na]<sup>+</sup> 11%), 515 ([M+Na]<sup>+</sup> 100%), 516 ([M(<sup>13</sup>C)+Na]<sup>+</sup> 33%), 517 ([M(<sup>13</sup>C<sub>2</sub>)+Na]<sup>+</sup> 6%), 805 (7%); HRMS (ESI<sup>+</sup>) C<sub>27</sub>H<sub>32</sub>N<sub>4</sub>NO<sub>5</sub>Na [M+Na]<sup>+</sup> found 515.2271, requires 515.2265 (1.1 ppm).

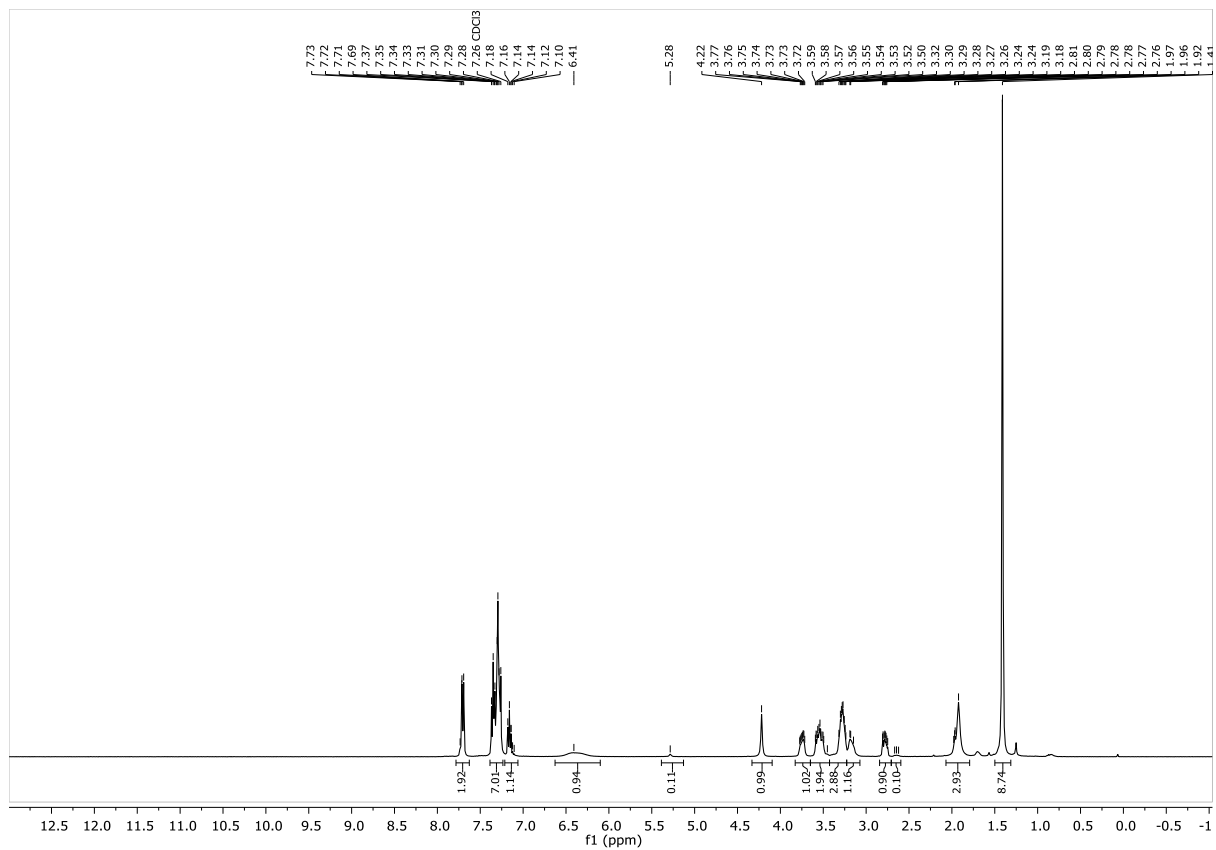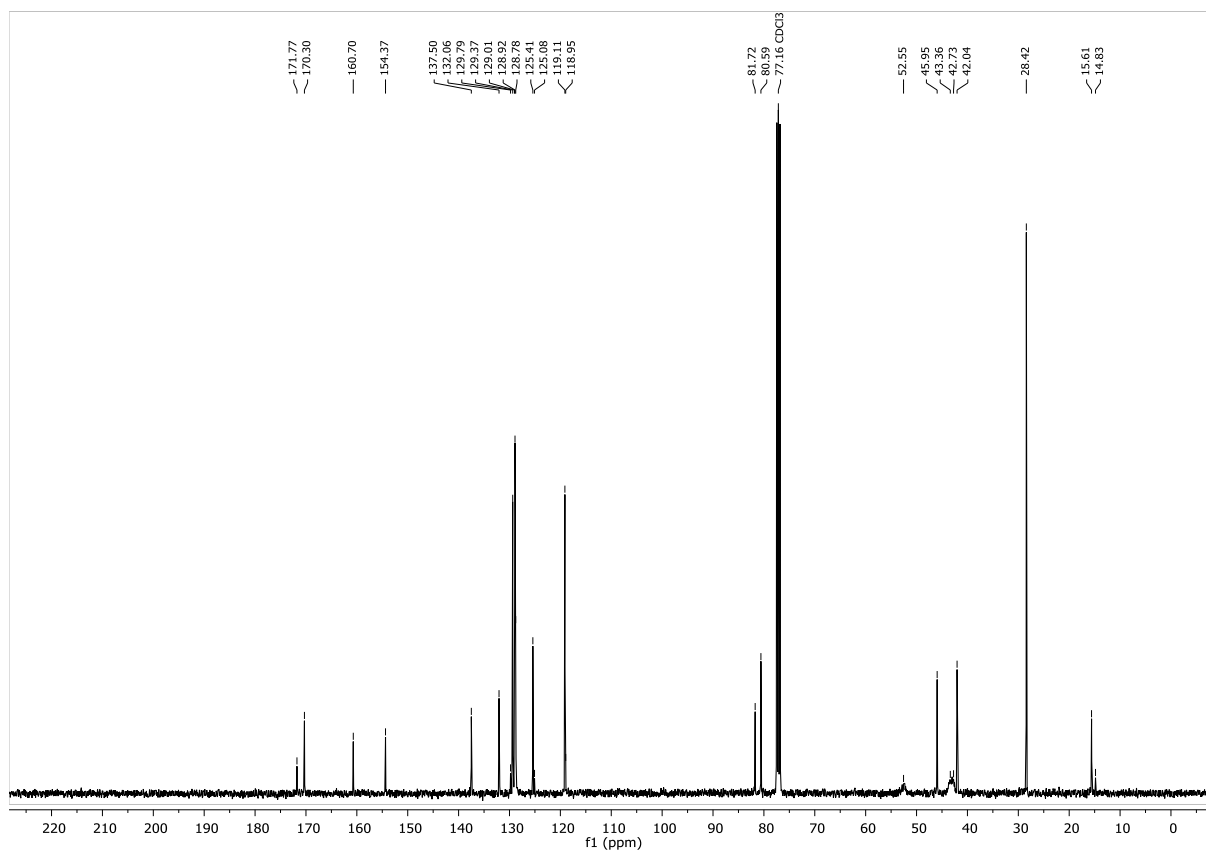



mAU

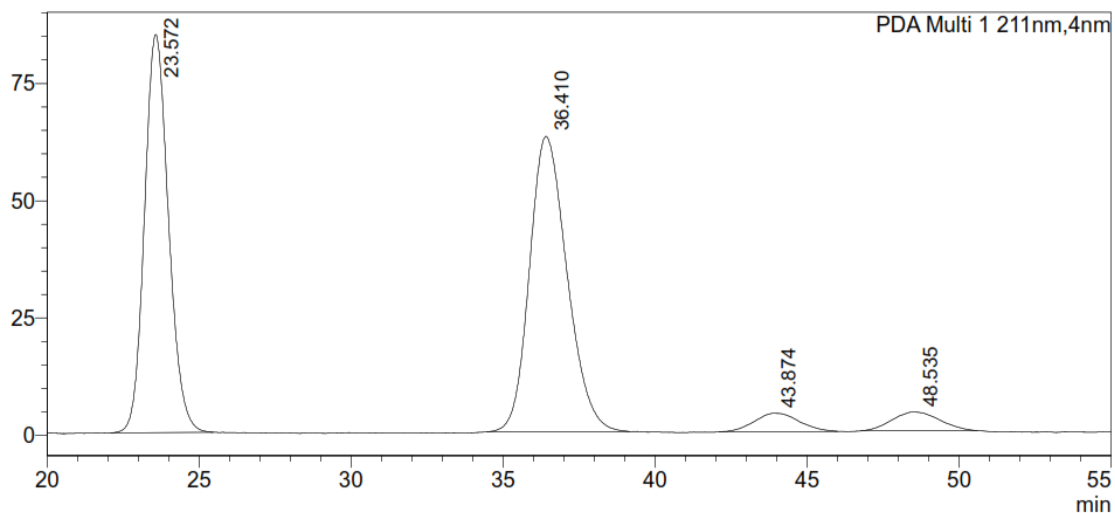

**<Peak Table>**

PDA Ch1 211nm

| Peak# | Ret. Time | Area%   |
|-------|-----------|---------|
| 1     | 23.572    | 42.719  |
| 2     | 36.410    | 49.588  |
| 3     | 43.874    | 3.694   |
| 4     | 48.535    | 3.998   |
| Total |           | 100.000 |

mAU

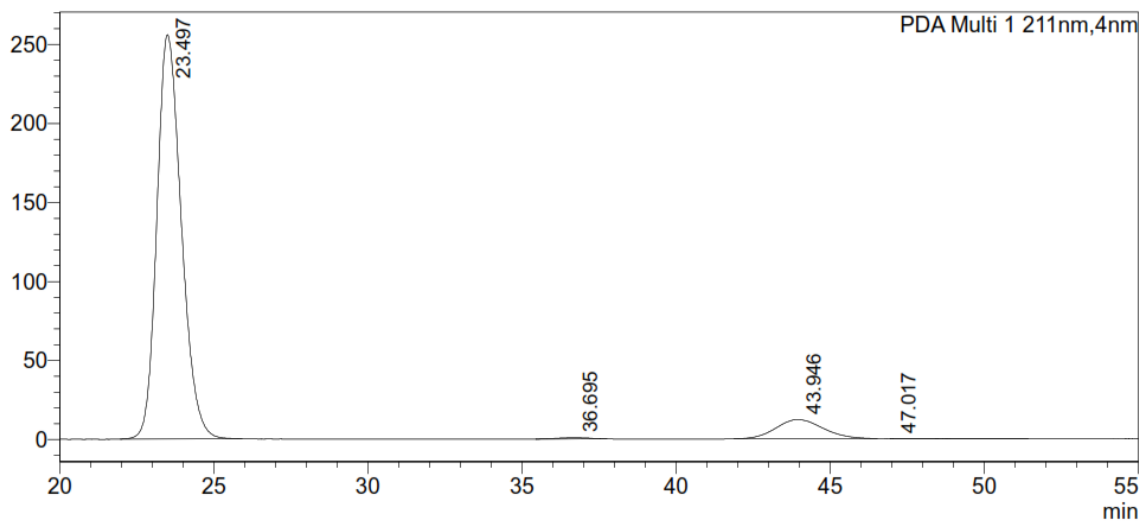

**<Peak Table>**

PDA Ch1 211nm

| Peak# | Ret. Time | Area%   |
|-------|-----------|---------|
| 1     | 23.497    | 91.281  |
| 2     | 36.695    | 0.387   |
| 3     | 43.946    | 8.316   |
| 4     | 47.017    | 0.016   |
| Total |           | 100.000 |

## 6. Epimerisation Experiments

### 6.1. Epimerisation of Amide **14**

To a 5 ml round bottomed flask was charged with amide **14** (51.6 mg, 0.13 mmol) was added EtOAc (3.0 ml, 0.04 M), *i*Pr<sub>2</sub>NEt (28  $\mu$ l, 0.16 mmol) and rac-HyperBTM (2.0 mg, 0.01 mmol). The mixture was stirred for 3 h at 0 °C. Morpholine (33  $\mu$ l, 0.38 mmol) was added and the reaction was left to be stirred overnight. The solvent was removed under reduced pressure and the mixture columned through pipette (Hexane:EtOAc 1:1). Analysis by <sup>1</sup>H NMR showed no change suggesting that compound **14** is stable under the reaction conditions.

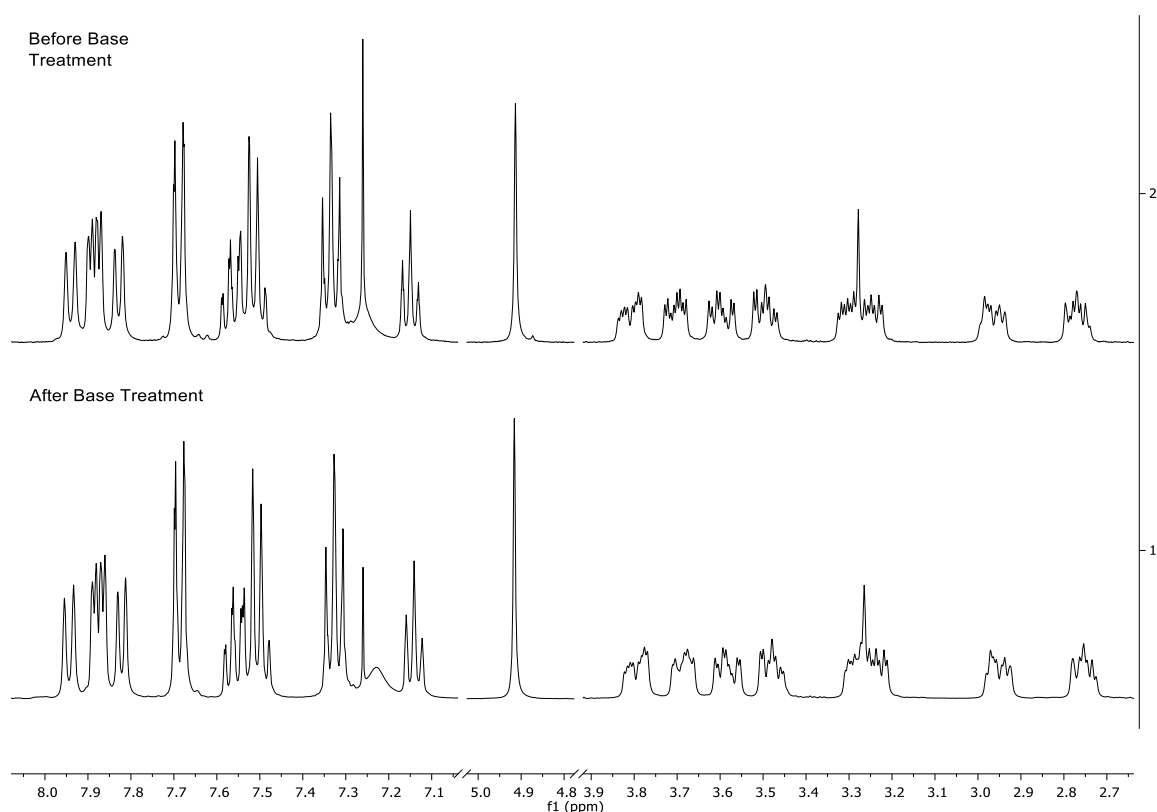

### 6.2. Epimerisation of Lactone **13**

A sample of Lactone **13** (1.47  $\mu$ mol) was transferred to an NMR tube using 750  $\mu$ l CDCl<sub>3</sub>. Hünig's base (2.5  $\mu$ l, 14  $\mu$ mol) was added and the reaction was monitored by <sup>1</sup>H NMR.

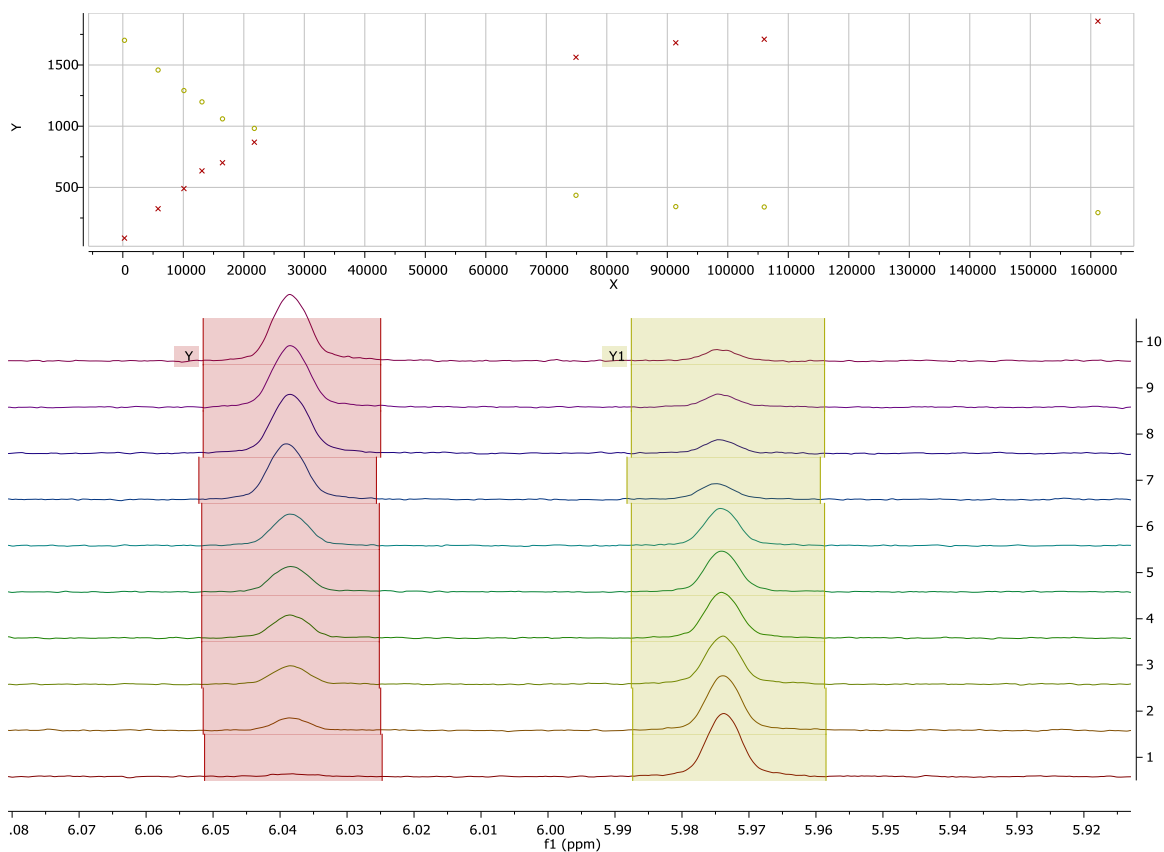

Figure S1: Monitoring of epimerisation of **13** to **12** using  $^1\text{H}$  NMR analysed with MNova.

Table S2: Data for the monitoring of the epimerisation of **13** to **12** via  $^1\text{H}$  NMR.

| #  | Time [h] | Integral Major<br>(6.051,6.025) | Major<br>[M]·10 <sup>8</sup> | Integral<br>Minor<br>(5.987,5.958) | Minor<br>[M]·10 <sup>8</sup> | Integral<br>Hünig's base<br>(3.114,2.979) | d.r.<br>Minor/Major | d.e.<br>Major/Minor |
|----|----------|---------------------------------|------------------------------|------------------------------------|------------------------------|-------------------------------------------|---------------------|---------------------|
| 0  | 0.0      |                                 |                              |                                    |                              |                                           | 97.0                | -0.94               |
| 1  | 0.1      | 85                              | 2.3                          | 1701                               | 47.0                         | 34654                                     | 95.2                | -0.90               |
| 2  | 1.6      | 325                             | 9.0                          | 1460                               | 40.3                         | 34657                                     | 81.8                | -0.64               |
| 3  | 2.8      | 490                             | 13.5                         | 1292                               | 35.7                         | 34665                                     | 72.5                | -0.45               |
| 4  | 3.6      | 635                             | 17.3                         | 1198                               | 32.6                         | 35190                                     | 65.4                | -0.31               |
| 5  | 4.6      | 703                             | 19.5                         | 1059                               | 29.4                         | 34464                                     | 60.1                | -0.20               |
| 6  | 6.0      | 868                             | 23.2                         | 980                                | 26.2                         | 35754                                     | 53.0                | -0.06               |
| 7  | 20.8     | 1564                            | 38.3                         | 437                                | 10.7                         | 39123                                     | 21.8                | 0.56                |
| 8  | 25.4     | 1683                            | 40.5                         | 342                                | 8.3                          | 39723                                     | 16.9                | 0.66                |
| 9  | 29.5     | 1710                            | 40.5                         | 340                                | 8.1                          | 40414                                     | 16.6                | 0.67                |
| 10 | 44.8     | 1859                            | 41.7                         | 294                                | 6.6                          | 42633                                     | 13.6                | 0.73                |

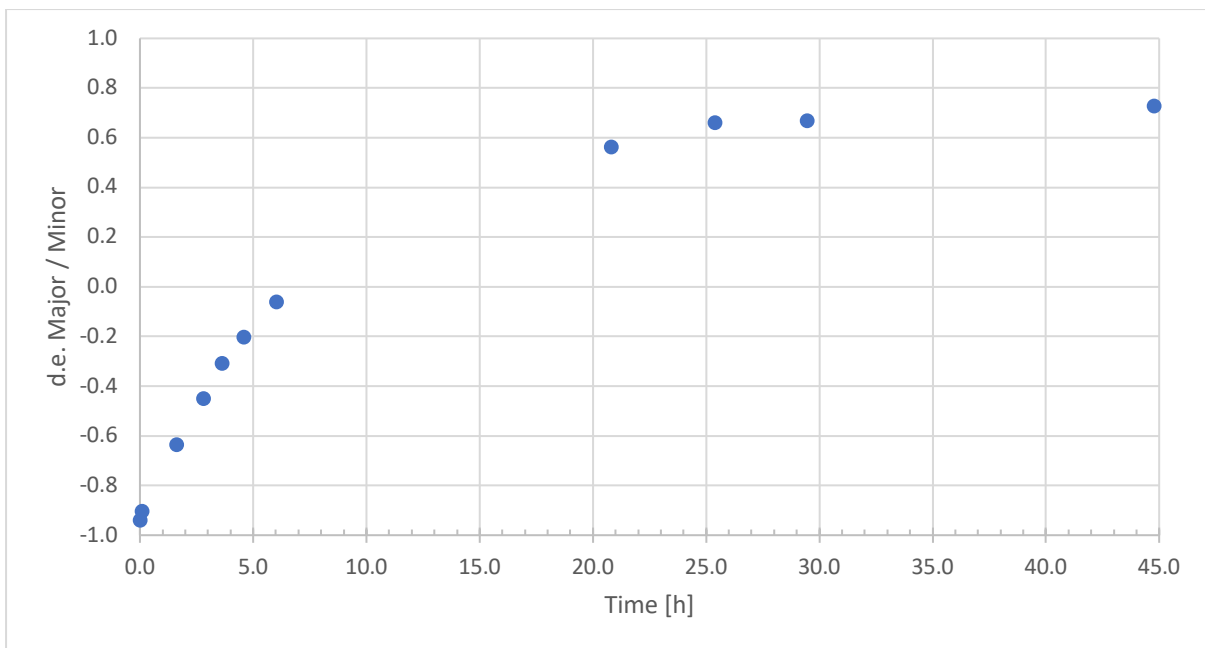

Figure S2: Plot of the change of d.e. over time. Negative d.e. indicates excess of the minor diastereomer **13**, positive d.e. indicates excess of the major diastereomer **12**.

## 7. Crystallographic Data

X-ray diffraction data for compound (3*S*,4*R*)-**13** were collected at 125 K using a Rigaku MM-007HF High Brilliance RA generator/confocal optics [Cu K $\alpha$  radiation ( $\lambda = 1.54187 \text{ \AA}$ )] with XtaLAB P200 diffractometer. Diffraction data for compound (1'*R*,4*R*)-**21** were collected at 173 K using a Rigaku FR-X Ultrahigh Brilliance Microfocus RA generator/confocal optics [Mo K $\alpha$  radiation ( $\lambda = 0.71073 \text{ \AA}$ )] with XtaLAB P200 diffractometer. Intensity data for both structures were collected using  $\omega$  steps accumulating area detector images spanning at least a hemisphere of reciprocal space. Data for both compounds were collected using CrystalClear and processed (including correction for Lorentz, polarization and absorption) using either CrystalClear or CrysAlisPro.<sup>[26]</sup> The structures were solved by dual-space methods (SHELXT)<sup>[27]</sup> and refined by full-matrix least-squares against  $F^2$  (SHELXL-2019/3).<sup>[28]</sup> Non-hydrogen atoms were refined anisotropically, and hydrogen atoms were refined using a riding model, except for the hydrogen atom bound to oxygen in (1'*R*,4*R*)-**21** which was located from the difference Fourier map and refined isotropically subject to a distance restraint. Crystals of (3*S*,4*R*)-**13** appeared to degrade under prolonged X-ray exposure, even at low temperatures, leading to lower data quality metrics, and a value of the Flack parameter showing wide error bounds. The compound was determined to be predominantly enantiopure by other analytical techniques, so the absolute structure is considered correctly assigned based on the Flack parameter, despite the value of its standard uncertainty. All calculations were performed using the Olex2 interface.<sup>[29]</sup> Selected crystallographic data are presented in Table #. CCDC 2314276-2314277 contains the supplementary crystallographic data for this paper. These data can be obtained free of charge from The Cambridge Crystallographic Data Centre via [www.ccdc.cam.ac.uk/structures](http://www.ccdc.cam.ac.uk/structures).

Table S3: Selected crystallographic data.

|                                                             | (3 <i>S</i> ,4 <i>R</i> )- <b>13</b>                          | (1' <i>R</i> ,4 <i>R</i> )- <b>21</b>                                         |
|-------------------------------------------------------------|---------------------------------------------------------------|-------------------------------------------------------------------------------|
| formula                                                     | C <sub>22</sub> H <sub>16</sub> N <sub>2</sub> O <sub>3</sub> | C <sub>23</sub> H <sub>23</sub> Cl <sub>4</sub> N <sub>3</sub> O <sub>4</sub> |
| fw                                                          | 356.37                                                        | 547.24                                                                        |
| crystal description                                         | Colourless needle                                             | Colourless prism                                                              |
| crystal size [mm <sup>3</sup> ]                             | 0.24×0.02×0.01                                                | 0.21×0.12×0.03                                                                |
| temperature [K]                                             | 125                                                           | 173                                                                           |
| space group                                                 | <i>P</i> 2 <sub>1</sub> 2 <sub>1</sub> 2 <sub>1</sub>         | <i>P</i> 2 <sub>1</sub> 2 <sub>1</sub> 2 <sub>1</sub>                         |
| <i>a</i> [Å]                                                | 6.3985(3)                                                     | 8.043(2)                                                                      |
| <i>b</i> [Å]                                                | 11.1440(6)                                                    | 10.783(3)                                                                     |
| <i>c</i> [Å]                                                | 24.0417(10)                                                   | 28.473(8)                                                                     |
| vol [Å <sup>3</sup> ]                                       | 1714.29(14)                                                   | 2469.3(11)                                                                    |
| <i>Z</i>                                                    | 4                                                             | 4                                                                             |
| $\rho$ (calc) [g/cm <sup>3</sup> ]                          | 1.381                                                         | 1.472                                                                         |
| $\mu$ [mm <sup>-1</sup> ]                                   | 0.757                                                         | 0.515                                                                         |
| F(000)                                                      | 744                                                           | 1128                                                                          |
| reflections collected                                       | 9455                                                          | 32369                                                                         |
| independent reflections ( <i>R</i> <sub>int</sub> )         | 3412 (0.0548)                                                 | 4495 (0.0574)                                                                 |
| parameters, restraints                                      | 245, 0                                                        | 312, 1                                                                        |
| GoF on <i>F</i> <sup>2</sup>                                | 1.050                                                         | 1.028                                                                         |
| <i>R</i> <sub>1</sub> [ <i>I</i> > 2 $\sigma$ ( <i>I</i> )] | 0.0539                                                        | 0.0461                                                                        |
| <i>wR</i> <sub>2</sub> (all data)                           | 0.1545                                                        | 0.1386                                                                        |
| largest diff. peak/hole [e/Å <sup>3</sup> ]                 | 0.243, -0.342                                                 | 0.477, -0.456                                                                 |
| Flack parameter                                             | 0.1(2)                                                        | -0.02(2)                                                                      |

## checkCIF/PLATON report

Structure factors have been supplied for datablock(s) 1R,4R-21, 3S,4R-13

THIS REPORT IS FOR GUIDANCE ONLY. IF USED AS PART OF A REVIEW PROCEDURE FOR PUBLICATION, IT SHOULD NOT REPLACE THE EXPERTISE OF AN EXPERIENCED CRYSTALLOGRAPHIC REFEREE.

No syntax errors found.    CIF dictionary    Interpreting this report

### Datablock: 3S,4R-13

---

Bond precision:    C-C = 0.0061 A                      Wavelength=1.54184  
Cell:                      a=6.3985 (3)            b=11.1440 (6)            c=24.0417 (10)  
                                        alpha=90                beta=90                    gamma=90  
Temperature:            125 K

|                        | Calculated    | Reported      |
|------------------------|---------------|---------------|
| Volume                 | 1714.29 (14)  | 1714.29 (14)  |
| Space group            | P 21 21 21    | P 21 21 21    |
| Hall group             | P 2ac 2ab     | P 2ac 2ab     |
| Moiety formula         | C22 H16 N2 O3 | C22 H16 N2 O3 |
| Sum formula            | C22 H16 N2 O3 | C22 H16 N2 O3 |
| Mr                     | 356.37        | 356.37        |
| Dx, g cm <sup>-3</sup> | 1.381         | 1.381         |
| Z                      | 4             | 4             |
| Mu (mm <sup>-1</sup> ) | 0.757         | 0.757         |
| F000                   | 744.0         | 744.0         |
| F000'                  | 746.31        |               |
| h, k, lmax             | 7, 13, 30     | 7, 13, 29     |
| Nref                   | 3474 [ 2022]  | 3412          |
| Tmin, Tmax             | 0.982, 0.992  | 0.579, 1.000  |
| Tmin'                  | 0.834         |               |

Correction method= # Reported T Limits: Tmin=0.579 Tmax=1.000  
AbsCorr = MULTI-SCAN

Data completeness= 1.69/0.98                      Theta (max)= 74.390

R(reflections)= 0.0539 ( 2542)                                              wR2(reflections)=  
S = 1.050                                              Npar= 245                                              0.1545 ( 3412)

---

The following ALERTS were generated. Each ALERT has the format  
**test-name\_ALERT\_alert-type\_alert-level.**  
Click on the hyperlinks for more details of the test.

---

● **Alert level C**

PLAT340\_ALERT\_3\_C Low Bond Precision on C-C Bonds ..... 0.00613 Ang.  
PLAT911\_ALERT\_3\_C Missing FCF Refl Between Thmin & STh/L= 0.600 3 Report  
2 12 0, 2 12 1, 3 0 7,

---

● **Alert level G**

PLAT380\_ALERT\_4\_G Incorrectly? Oriented X(sp<sup>2</sup>)-Methyl Moiety ..... C25 Check  
PLAT398\_ALERT\_2\_G Deviating C-O-C Angle From 120 for O6 . 91.7 Degree  
PLAT432\_ALERT\_2\_G Short Inter X...Y Contact C12 ..C17 . 3.20 Ang.  
-1+x,y,z = 1\_455 Check  
PLAT912\_ALERT\_4\_G Missing # of FCF Reflections Above STh/L= 0.600 7 Note  
PLAT941\_ALERT\_3\_G Average HKL Measurement Multiplicity ..... 4.7 Low  
PLAT978\_ALERT\_2\_G Number C-C Bonds with Positive Residual Density. 0 Info

---

0 **ALERT level A** = Most likely a serious problem - resolve or explain  
0 **ALERT level B** = A potentially serious problem, consider carefully  
2 **ALERT level C** = Check. Ensure it is not caused by an omission or oversight  
6 **ALERT level G** = General information/check it is not something unexpected

0 ALERT type 1 CIF construction/syntax error, inconsistent or missing data  
3 ALERT type 2 Indicator that the structure model may be wrong or deficient  
3 ALERT type 3 Indicator that the structure quality may be low  
2 ALERT type 4 Improvement, methodology, query or suggestion  
0 ALERT type 5 Informative message, check

---

## Datablock: 1R,4R-21

---

Bond precision: C-C = 0.0063 A

Wavelength=0.71073

Cell: a=8.043 (2)

b=10.783 (3)

c=28.473 (8)

alpha=90

beta=90

gamma=90

Temperature: 173 K





---

0 **ALERT level A** = Most likely a serious problem - resolve or explain  
0 **ALERT level B** = A potentially serious problem, consider carefully  
3 **ALERT level C** = Check. Ensure it is not caused by an omission or oversight  
7 **ALERT level G** = General information/check it is not something unexpected

0 ALERT type 1 CIF construction/syntax error, inconsistent or missing data  
4 ALERT type 2 Indicator that the structure model may be wrong or deficient  
4 ALERT type 3 Indicator that the structure quality may be low  
2 ALERT type 4 Improvement, methodology, query or suggestion  
0 ALERT type 5 Informative message, check

---

It is advisable to attempt to resolve as many as possible of the alerts in all categories. Often the minor alerts point to easily fixed oversights, errors and omissions in your CIF or refinement strategy, so attention to these fine details can be worthwhile. In order to resolve some of the more serious problems it may be necessary to carry out additional measurements or structure refinements. However, the purpose of your study may justify the reported deviations and the more serious of these should normally be commented upon in the discussion or experimental section of a paper or in the "special\_details" fields of the CIF. checkCIF was carefully designed to identify outliers and unusual parameters, but every test has its limitations and alerts that are not important in a particular case may appear. Conversely, the absence of alerts does not guarantee there are no aspects of the results needing attention. It is up to the individual to critically assess their own results and, if necessary, seek expert advice.

#### **Publication of your CIF in IUCr journals**

A basic structural check has been run on your CIF. These basic checks will be run on all CIFs submitted for publication in IUCr journals (*Acta Crystallographica*, *Journal of Applied Crystallography*, *Journal of Synchrotron Radiation*); however, if you intend to submit to *Acta Crystallographica Section C* or *E* or *IUCrData*, you should make sure that full publication checks are run on the final version of your CIF prior to submission.

#### **Publication of your CIF in other journals**

Please refer to the *Notes for Authors* of the relevant journal for any special instructions relating to CIF submission.

---

**PLATON version of 29/11/2023; check.def file version of 14/09/2023**

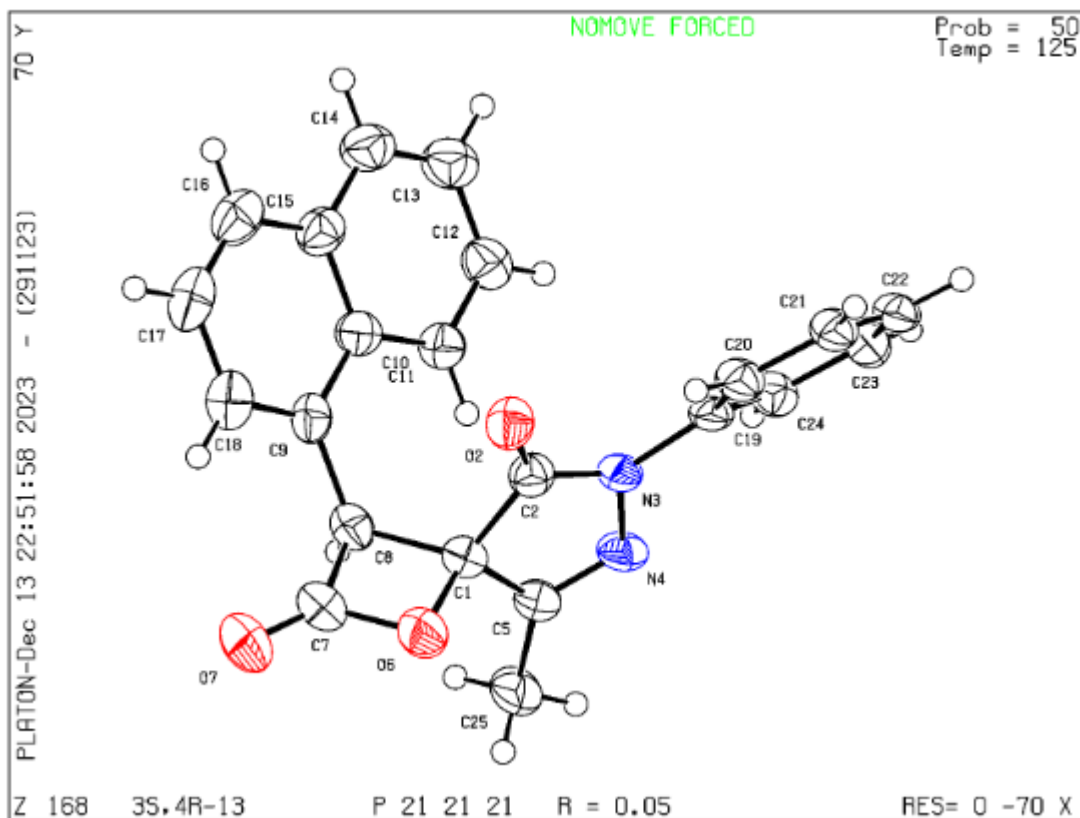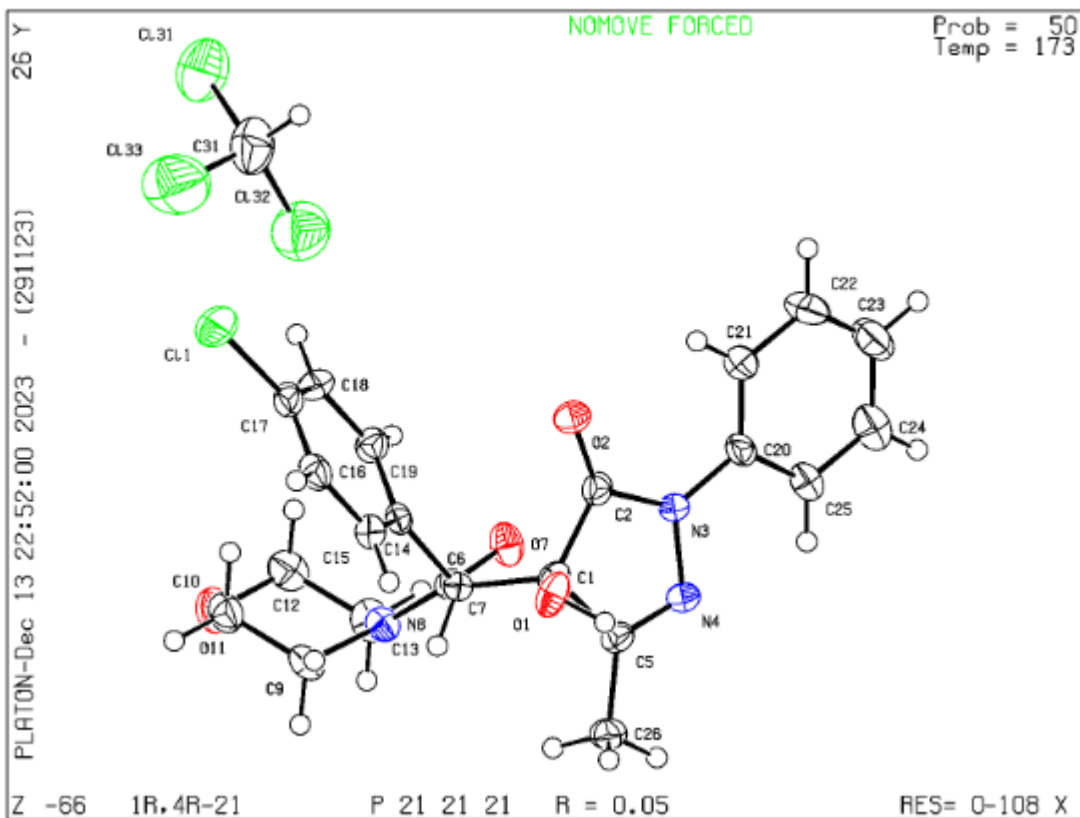

## 8. Computation

### 8.1. Computational details

Geometry optimisations were performed with the *meta*-hybrid M06-2X functional<sup>[30]</sup> using the double- $\zeta$ , def2-SVP basis set from the redefinition of the Ahlrichs family of basis sets.<sup>[31]</sup> Implicit solvation was considered through the use of the SMD model employing the parameters of dichloromethane ( $\epsilon = 8.93$ ).<sup>[32]</sup> An ultrafine integration grid (99 radial shells with 590 angular points per shell) was used for all calculations and all species were formally treated as closed-shell systems with restricted Kohn-Sham DFT used throughout. The nature of minima and transition states located were verified by the computation of harmonic frequencies at the same level of theory. Single-point energies ( $E_{sp}$ ) were also evaluated using the M06-2X functional<sup>[30]</sup> with a larger, triple- $\zeta$ , def2-TZVP basis. Implicit solvation was also included at this level of theory using the same ultrafine integration grid (99,590). Additional empirical dispersion corrections were not included as the functional implicitly accounts for dispersion due to the nature of its construction. Thermochemistry was evaluated at 1 atm and 298.15 K using thermodynamic calculations at the level of geometry optimisation (thermal corrections to enthalpy,  $\delta H_{298.15}$ , and entropies  $S_{298.15}$ ) in combination with energetics obtained from single-point calculations. Quasi-rigid-rotor entropies were evaluated at 298 K with *GoodVibes*, v3.2<sup>[33]</sup> following the Truhlar method and a 100 cm<sup>-1</sup> cutoff.<sup>[34]</sup> Gibbs free energy was calculated at 298 K using Equation 1, with additional Martin Hay Pratt empirical entropic corrections included ( $S_{MHP} = 3.52$  kcal/mol per particle, evaluated at 382 atm to mimic bulk dichloromethane).<sup>[35]</sup> All computations were performed using the Gaussian16, C.01 programme<sup>[36]</sup> with visualisation of structures using CYLview20<sup>[37]</sup> and GaussView6.1.1<sup>[36]</sup> and of non-covalent interactions performed using NCIPLOT 4.0.<sup>[38]</sup> This and similar levels of DFT have previously been used successfully to rationalise reactivities and selectivities of organocatalytic reactions with isothioureas.<sup>[39]</sup>

$$G_{298.15} = E_{sp} + \delta H_{298.15} - TS_{298.15} + S_{MHP} \quad (1)$$

### 8.2. Interaction and Reorganisation Energies

Following the activation-strain model,<sup>[40]</sup> both interaction and reorganisation energies were calculated from the respective geometry by fragmenting into the morpholine nucleophile and spirocyclic electrophile. Single-point energies of the TS and each fragment (in the geometry of the TS) were computed in the gas-phase and the interaction energy is given by Equation 2. Reorganisation energies are calculated by the gas-phase single-point of the relaxed geometry of each fragment (*e.g.* minima of each reactant) and this is given by Equation 3.

$$\Delta E_{interaction} = E_{complex} - \sum E_{rigid\_fragments} \quad (2)$$

$$\Delta E_{reorg} = \sum (E_{rigid\_fragment} - E_{relaxed\_fragment}) \quad (3)$$

### 8.3. Computational Discussion

The energy difference between TS1<sub>major/minor</sub> (and tetrahedral intermediates) is larger than TS2<sub>major/minor</sub> due to a more pronounced reorganisation required for these species. For nucleophilic attack through the minor pathway, the aromatic group is oriented towards the approaching nucleophile and must move out of the way at a significant energetic cost for this pathway. As such, the major pathway is favoured with  $\Delta\Delta E_{reorg} = 10.54$ , 6.77 and 2.32 kcal/mol for TS1, the tetrahedral intermediate and TS2 respectively.

**Table S4.** Comparison of N–H bond lengths across structures. Bond lengths in Å (M06-2X<sub>SMD</sub>/def2-SVP).

|              | TS1   | tetrahedral intermediate | TS2   | morpholine (axial H) <sup>a</sup> | morpholine (equatorial H) |
|--------------|-------|--------------------------|-------|-----------------------------------|---------------------------|
| <i>major</i> | 1.025 | 1.032                    | 1.056 | 1.021                             | 1.018                     |
| <i>minor</i> | 1.026 | 1.031                    | 1.054 |                                   |                           |

<sup>a</sup> morpholine was assumed to react in this NH-axial conformation, so that the lactone moiety will end up in the more favourable equatorial position.

### 8.4. Treatment of Low-Lying Vibrational Frequencies

We found that corrections to the rigid-rotor approximation of harmonic frequencies was important for this system to accurately reproduce the experimental selectivities. These were performed using *quasi-harmonic* (*qh*) corrections from the *GoodVibes*, v3.2 programme.<sup>[33]</sup> In essence, in the simplest case proposed by Truhlar,<sup>[34]</sup> vibrational modes below 100 cm<sup>-1</sup> are all scaled to 100 cm<sup>-1</sup> allow for an identical contribution of each mode towards the entropy of the system. Alternatively, proposed by Grimme,<sup>[41]</sup> vibrational modes below 100 cm<sup>-1</sup> are treated instead as free-rotors, or rotations, alongside scaling to interpolate between the rotational and harmonic vibrations (this method is used by default in ORCA calculations). More methodological details are available in the references provided.

Regardless of the entropic corrections, calculations of the spirocyclic system gave good agreement with the *enrichment* found in the DyKAT process, with raw electronic energies, enthalpies, and free energies replicating a larger selectivity between the transition states (kinetic) compared to between the two β-lactone diastereomeric [2+2] products (thermodynamic).

**Table S5.** Comparison of the calculated difference in thermodynamic and kinetic selectivities derived from different energy terms and employing different *quasi-harmonic* corrections to entropy. Relative energy values are in kcal/mol.

|                   | $\Delta\Delta E_{sp}$ | $\Delta\Delta H$<br>( $E_{sp} + \delta H$ ) | $\Delta\Delta G$<br>( $E_{sp} + \delta H - T.S$ ) | $\Delta\Delta G$<br>( <i>qh</i> -Truhlar) | $\Delta\Delta G$<br>( <i>qh</i> -Grimme) | $\Delta\Delta G$<br>(expt estimate) |
|-------------------|-----------------------|---------------------------------------------|---------------------------------------------------|-------------------------------------------|------------------------------------------|-------------------------------------|
| thermodynamic     | 0.29                  | 0.34                                        | -0.22 <sup>a</sup>                                | 0.31                                      | 0.07                                     | 0.50                                |
| kinetic           | 0.67                  | 1.11                                        | 0.58                                              | 0.92                                      | 0.76                                     | 1.18                                |
| <i>enrichment</i> | 0.38                  | 0.77                                        | 0.80                                              | 0.61                                      | 0.69                                     | 0.68                                |

<sup>a</sup> negative value indicates that the computational "prediction" was in the wrong direction relative to experiment.

## 8.5. Computational Data

Raw data and cartesian coordinates obtained from geometry optimisation and frequency calculations with subsequent single-point energy calculations.

-----  
morph-axH

Frequencies, energies and thermodynamic properties:

Lowest Vibrational Mode (1/cm) = 249.9680  
 2nd Lowest Vibrational Mode (1/cm) = 270.7806  
 E(RM062X) (a.u.) = -287.454708902  
 Thermal correction to Enthalpy (a.u.) = 0.142096  
 Thermal correction to Gibbs Free Energy (a.u.) = 0.107445  
 Total Entropy (cal/Kmol) = 72.929  
 Total Entropy *qh*-Truhlar (cal/Kmol) = 72.9281  
 Total Entropy *qh*-Grimme (cal/Kmol) = 72.9449  
 Esp(RM062X) (a.u.) = -287.788872074  
 Esp(RM062X) gas (a.u.) = -287.777992668

Optimised cartesian coordinates (Angstrom):

H 0.000000 1.519036 1.210537  
 N 0.000000 1.441072 0.192168  
 C -1.199597 0.718853 -0.221335  
 C -1.168692 -0.745230 0.197982  
 O 0.000000 -1.379398 -0.275319  
 C 1.168692 -0.745230 0.197982  
 C 1.199597 0.718853 -0.221335  
 H -1.270539 0.768286 -1.321305  
 H -2.090983 1.213439 0.192125  
 H -2.027489 -1.296212 -0.211948  
 H -1.211802 -0.812927 1.304667  
 H 2.027489 -1.296213 -0.211948  
 H 1.211802 -0.812927 1.304667  
 H 1.270539 0.768286 -1.321305  
 H 2.090983 1.213439 0.192125

-----  
morph-eqH

Frequencies, energies and thermodynamic properties:

Lowest Vibrational Mode (1/cm) = 267.2973  
 2nd Lowest Vibrational Mode (1/cm) = 274.6043  
 E(RM062X) (a.u.) = -287.455560158  
 Thermal correction to Enthalpy (a.u.) = 0.142207  
 Thermal correction to Gibbs Free Energy (a.u.) = 0.107658  
 Total Entropy (cal/Kmol) = 72.716  
 Total Entropy *qh*-Truhlar (cal/Kmol) = 72.7155  
 Total Entropy *qh*-Grimme (cal/Kmol) = 72.7302  
 Esp(RM062X) (a.u.) = -287.789684184  
 Esp(RM062X) gas (a.u.) = -287.779425383

Optimised cartesian coordinates (Angstrom):

H 0.683423 2.247305 0.000000  
 N 0.664731 1.229858 0.000000  
 C -0.006296 0.740821 1.195832  
 C -0.006296 -0.778825 1.166581  
 O -0.635498 -1.262203 0.000000  
 C -0.006296 -0.778825 -1.166581  
 C -0.006296 0.740821 -1.195832  
 H -1.059312 1.086650 1.263397  
 H 0.524256 1.091294 2.093255  
 H -0.554946 -1.187643 2.026256  
 H 1.039278 -1.141624 1.209945  
 H -0.554946 -1.187643 -2.026256  
 H 1.039278 -1.141624 -1.209945  
 H -1.059312 1.086650 -1.263397  
 H 0.524256 1.091294 -2.093255

-----  
spiro-RR

Frequencies, energies and thermodynamic properties:

Lowest Vibrational Mode (1/cm) = 22.6861  
2nd Lowest Vibrational Mode (1/cm) = 26.1784  
E(RM062X) (a.u.) = -1028.35189031  
Thermal correction to Enthalpy (a.u.) = 0.307432  
Thermal correction to Gibbs Free Energy (a.u.) = 0.239175  
Total Entropy (cal/Kmol) = 143.658  
Total Entropy qh-Truhlar (cal/Kmol) = 134.2616  
Total Entropy qh-Grimme (cal/Kmol) = 135.7307  
Esp(RM062X) (a.u.) = -1029.49738538  
Esp(RM062X) gas (a.u.) = -1029.46998018

Optimised cartesian coordinates (Angstrom):

O -1.178723 -1.984905 -1.179012  
C -0.863305 -1.217552 -0.304758  
N -1.608218 -0.235086 0.305594  
C -2.950225 0.137657 0.061946  
C -3.499752 1.214150 0.771596  
C -4.818262 1.594485 0.536137  
C -5.599409 0.917053 -0.400169  
C -5.044669 -0.152279 -1.101647  
C -3.727497 -0.551324 -0.880093  
N -0.907864 0.397641 1.328267  
C 0.279934 -0.070737 1.401769  
C 1.263806 0.335408 2.437890  
C 0.521063 -1.092814 0.327000  
O 1.091581 -2.337712 0.757088  
C 2.180732 -2.184749 -0.047685  
C 1.680807 -0.904058 -0.695761  
C 2.515585 0.344258 -0.663875  
C 3.878231 0.310139 -0.357886  
C 4.610297 1.498242 -0.307286  
C 3.985548 2.719518 -0.555251  
C 2.623533 2.754377 -0.864333  
C 1.892197 1.570838 -0.923405  
O 3.127935 -2.892284 -0.105849  
H -2.891079 1.743459 1.501724  
H -5.235970 2.433897 1.094795  
H -6.631719 1.219816 -0.580708  
H -5.642421 -0.694194 -1.836651  
H -3.307105 -1.388504 -1.430714  
H 2.141949 0.812550 1.977480  
H 1.613486 -0.554250 2.983055  
H 0.795637 1.033956 3.141555  
H 1.313699 -1.130073 -1.710585  
H 4.369496 -0.644294 -0.159937  
H 5.674681 1.465774 -0.068805  
H 4.559437 3.646566 -0.510145  
H 2.129970 3.707565 -1.060981  
H 0.824492 1.593382 -1.160061

-----  
spiro-RS

Frequencies, energies and thermodynamic properties:

Lowest Vibrational Mode (1/cm) = 16.2854  
2nd Lowest Vibrational Mode (1/cm) = 21.6953  
E(RM062X) (a.u.) = -1028.35135826  
Thermal correction to Enthalpy (a.u.) = 0.307509  
Thermal correction to Gibbs Free Energy (a.u.) = 0.238365  
Total Entropy (cal/Kmol) = 145.525  
Total Entropy qh-Truhlar (cal/Kmol) = 134.3437  
Total Entropy qh-Grimme (cal/Kmol) = 136.6441  
Esp(RM062X) (a.u.) = -1029.49692544  
Esp(RM062X) gas (a.u.) = -1029.46648816

Optimised cartesian coordinates (Angstrom):

O -0.014851 0.266063 -1.707498  
C -0.186077 -0.490193 -0.785214  
N -1.314721 -0.704203 -0.026034  
C -2.577280 -0.076450 -0.125335  
C -2.768916 1.014026 -0.985907  
C -4.024284 1.615567 -1.057337  
C -5.088819 1.150743 -0.286268  
C -4.887079 0.066896 0.568287  
C -3.641434 -0.549581 0.654379  
N -1.154142 -1.760762 0.864957  
C 0.033360 -2.228449 0.778478  
C 0.528287 -3.392135 1.555812  
C 0.856099 -1.427215 -0.183461  
O 1.616866 -2.132384 -1.171060  
C 2.747514 -1.423471 -0.889333  
C 2.156988 -0.720448 0.323748  
C 2.230688 0.769872 0.472955  
C 1.848946 1.345449 1.690773  
C 1.862719 2.729759 1.849226  
C 2.268369 3.548627 0.794075  
C 2.654732 2.979101 -0.419148  
C 2.631655 1.594330 -0.583315  
O 3.772333 -1.450284 -1.480045  
H -1.946858 1.384161 -1.592774  
H -4.164614 2.463313 -1.730264  
H -6.067089 1.629102 -0.350217  
H -5.708728 -0.309798 1.180075  
H -3.484625 -1.394200 1.322050  
H 0.885206 -4.173246 0.868174  
H -0.275810 -3.795731 2.182296  
H 1.375373 -3.098704 2.193947  
H 2.509651 -1.231256 1.233515  
H 1.539005 0.701814 2.517751  
H 1.561631 3.170416 2.801049  
H 2.285219 4.632652 0.919090  
H 2.974146 3.615192 -1.246207  
H 2.931947 1.155305 -1.536604

-----  
spiro-TS1-RR\_R

Frequencies, energies and thermodynamic properties:

Lowest Vibrational Mode (1/cm) = -109.5193  
2nd Lowest Vibrational Mode (1/cm) = 20.8819  
E(RM062X) (a.u.) = -1315.81517439  
Thermal correction to Enthalpy (a.u.) = 0.451142  
Thermal correction to Gibbs Free Energy (a.u.) = 0.369985  
Total Entropy (cal/Kmol) = 170.809  
Total Entropy qh-Truhlar (cal/Kmol) = 157.3959  
Total Entropy qh-Grimme (cal/Kmol) = 159.5490  
Esp(RM062X) (a.u.) = -1317.28568940  
Esp(RM062X) gas (a.u.) = -1317.25212731  
Esp(RM062X) gas nuc (a.u.) = -287.777479997  
Esp(RM062X) gas spiro (a.u.) = -1029.45120475

Optimised cartesian coordinates (Angstrom):

O -0.611590 -1.821219 -0.321327  
C -0.954194 -0.789406 0.216189  
N -2.224708 -0.308809 0.402850  
C -3.458387 -0.884339 0.020260  
C -3.505958 -2.128116 -0.626270  
C -4.740657 -2.660567 -0.994305  
C -5.926468 -1.977837 -0.727781  
C -5.868854 -0.742082 -0.083286  
C -4.646315 -0.190942 0.291158  
N -2.236787 0.875492 1.140544  
C -1.035985 1.234428 1.394683  
C -0.693909 2.404737 2.242868  
C -0.035693 0.296116 0.774677  
O 1.000331 -0.149272 1.633158  
C 2.018690 0.275471 0.736138  
N 2.352623 -1.513308 -0.075053  
H 1.468319 -1.883937 -0.437543  
C 3.352371 -1.360381 -1.128877  
C 3.903747 -2.708457 -1.573013  
O 4.407532 -3.431155 -0.474696  
C 3.412018 -3.664588 0.494958  
C 2.842372 -2.353735 1.016768  
O 3.102118 0.654526 1.103485  
C 0.988411 0.833340 -0.278041  
C 0.965942 2.304920 -0.596032  
C 1.992396 3.177630 -0.222849  
C 1.896995 4.538805 -0.523885  
C 0.780756 5.038483 -1.192266  
C -0.244468 4.168745 -1.572681  
C -0.148009 2.810659 -1.281483  
H -2.588814 -2.671221 -0.836509  
H -4.767831 -3.629169 -1.496609  
H -6.887116 -2.404775 -1.019019  
H -6.786797 -0.193010 0.133926  
H -4.602144 0.773110 0.793274  
H 0.000671 2.087226 3.034695  
H -1.603631 2.819770 2.693064  
H -0.190134 3.183916 1.651714  
H 4.164111 -0.743239 -0.711516  
H 2.906494 -0.823361 -1.979042  
H 4.729274 -2.568868 -2.284048  
H 3.106270 -3.289260 -2.077349  
H 3.874745 -4.233140 1.312971  
H 2.598150 -4.279670 0.062704  
H 3.629174 -1.781422 1.534561  
H 2.018049 -2.530511 1.720695  
H 0.939240 0.248795 -1.207148  
H 2.860233 2.788110 0.308797  
H 2.703250 5.212389 -0.227757  
H 0.708335 6.103367 -1.420112  
H -1.120787 4.550522 -2.099488  
H -0.952900 2.130425 -1.575179

-----  
spiro-TS1-RS\_R

Frequencies, energies and thermodynamic properties:

Lowest Vibrational Mode (1/cm) = -114.3470  
2nd Lowest Vibrational Mode (1/cm) = 23.1969  
E(RM062X) (a.u.) = -1315.81189079  
Thermal correction to Enthalpy (a.u.) = 0.451350  
Thermal correction to Gibbs Free Energy (a.u.) = 0.371791  
Total Entropy (cal/Kmol) = 167.446  
Total Entropy qh-Truhlar (cal/Kmol) = 156.1521  
Total Entropy qh-Grimme (cal/Kmol) = 157.7369  
Esp(RM062X) (a.u.) = -1317.28286966  
Esp(RM062X) gas (a.u.) = -1317.24728287  
Esp(RM062X) gas nuc (a.u.) = -287.777406934  
Esp(RM062X) gas spiro (a.u.) = -1029.43448115

Optimised cartesian coordinates (Angstrom):

O -0.529924 -1.051461 -0.634734  
C -0.967524 -0.430708 0.310980  
N -2.277076 -0.117287 0.571992  
C -3.426344 -0.416311 -0.195833  
C -3.310477 -0.875731 -1.515812  
C -4.464476 -1.151939 -2.247458  
C -5.729097 -0.975690 -1.687700  
C -5.834016 -0.514388 -0.375412  
C -4.694048 -0.233967 0.373365  
N -2.439867 0.489046 1.817449  
C -1.295635 0.640387 2.366004  
C -1.102060 1.211259 3.722509  
C -0.174335 0.171056 1.476905  
O 0.747744 -0.725456 2.072758  
C 1.894680 0.019835 1.604705  
N 2.241480 -0.968430 0.030173  
H 1.519951 -0.768682 -0.670916  
C 3.580638 -0.634822 -0.470663  
C 4.024478 -1.596403 -1.563795  
O 3.965861 -2.932345 -1.129186  
C 2.659675 -3.279560 -0.736958  
C 2.165910 -2.392718 0.393605  
O 2.934107 0.059979 2.222852  
C 0.956421 1.181280 1.152761  
C 1.122152 1.930238 -0.136056  
C 2.362078 2.544645 -0.371386  
C 2.583798 3.280913 -1.532136  
C 1.561912 3.428329 -2.473085  
C 0.319229 2.845114 -2.235436  
C 0.097474 2.103773 -1.072330  
H -2.330132 -1.019048 -1.962093  
H -4.365169 -1.509313 -3.273940  
H -6.625612 -1.195018 -2.269209  
H -6.815975 -0.369310 0.078388  
H -4.775695 0.128353 1.396026  
H -0.494448 0.521034 4.326060  
H -2.072148 1.373014 4.207052  
H -0.561812 2.168325 3.667698  
H 4.260984 -0.687775 0.391750  
H 3.578688 0.393413 -0.851918  
H 5.064120 -1.383055 -1.846639  
H 3.388340 -1.460002 -2.460708  
H 2.677218 -4.327921 -0.410062  
H 1.968127 -3.198435 -1.599131  
H 2.794210 -2.527917 1.288107  
H 1.129538 -2.634698 0.652428  
H 1.005033 1.895061 1.990918  
H 3.157520 2.435387 0.370241  
H 3.556216 3.747194 -1.700454  
H 1.732419 4.006185 -3.382950  
H -0.491941 2.969886 -2.954742  
H -0.896087 1.686737 -0.897379



-----  
spiro-TS2-RR\_R

Frequencies, energies and thermodynamic properties:

Lowest Vibrational Mode (1/cm) = -131.2236  
2nd Lowest Vibrational Mode (1/cm) = 22.4310  
E(RM062X) (a.u.) = -1315.79848235  
Thermal correction to Enthalpy (a.u.) = 0.451050  
Thermal correction to Gibbs Free Energy (a.u.) = 0.371996  
Total Entropy (cal/Kmol) = 166.383  
Total Entropy qh-Truhlar (cal/Kmol) = 155.6006  
Total Entropy qh-Grimme (cal/Kmol) = 156.9708  
Esp(RM062X) (a.u.) = -1317.27479177  
Esp(RM062X) gas (a.u.) = -1317.23403868  
Esp(RM062X) gas nuc (a.u.) = -287.773630997  
Esp(RM062X) gas spiro (a.u.) = -1029.33841878

Optimised cartesian coordinates (Angstrom):

O 1.111866 1.477398 -0.108336  
C 1.044927 0.313330 0.278940  
N 2.063846 -0.573763 0.373706  
C 3.430106 -0.413148 0.050705  
C 3.950585 0.841983 -0.297588  
C 5.302370 0.957855 -0.617732  
C 6.144546 -0.153118 -0.593388  
C 5.619186 -1.396784 -0.242299  
C 4.271220 -1.534523 0.078599  
N 1.645371 -1.791052 0.931931  
C 0.383406 -1.749167 1.132219  
C -0.318165 -2.853297 1.840701  
C -0.248026 -0.397524 0.764490  
O -0.877306 0.228754 1.771032  
C -2.175429 0.729548 -0.013632  
N -1.512224 2.085787 -0.037499  
H -0.469628 1.946036 0.057405  
C -1.751897 2.749489 -1.356711  
C -1.102782 4.123267 -1.339801  
O -1.597069 4.902904 -0.281931  
C -1.322198 4.310406 0.965478  
C -1.978023 2.947671 1.086732  
O -3.354946 0.717201 0.140631  
C -1.268753 -0.420677 -0.448357  
C -2.014242 -1.720394 -0.607288  
C -2.997116 -2.127573 0.306296  
C -3.609373 -3.372412 0.173917  
C -3.241679 -4.234534 -0.860747  
C -2.258279 -3.841064 -1.768482  
C -1.654798 -2.589205 -1.643960  
H 3.303141 1.714239 -0.316552  
H 5.698613 1.938769 -0.886485  
H 7.201354 -0.050779 -0.843980  
H 6.263781 -2.277272 -0.216979  
H 3.860225 -2.503396 0.354409  
H -1.059961 -2.410423 2.519865  
H 0.404300 -3.451679 2.410519  
H -0.847376 -3.510587 1.135859  
H -2.839226 2.828072 -1.490237  
H -1.324504 2.114217 -2.144474  
H -1.332740 4.640348 -2.280000  
H -0.004216 4.013889 -1.262290  
H -1.718534 4.971263 1.746559  
H -0.229289 4.217252 1.112921  
H -3.069577 3.022748 1.007487  
H -1.692549 2.425078 2.007080  
H -0.802748 -0.157402 -1.413377  
H -3.268653 -1.472897 1.133548  
H -4.374430 -3.675675 0.891042  
H -3.721199 -5.210038 -0.959651  
H -1.962892 -4.507062 -2.581242  
H -0.886703 -2.282331 -2.358126

-----  
spiro-TS2-RR\_S

Frequencies, energies and thermodynamic properties:

Lowest Vibrational Mode (1/cm) = -180.2882  
2nd Lowest Vibrational Mode (1/cm) = 18.6614  
E(RM062X) (a.u.) = -1315.78461218  
Thermal correction to Enthalpy (a.u.) = 0.451984  
Thermal correction to Gibbs Free Energy (a.u.) = 0.372691  
Total Entropy (cal/Kmol) = 166.887  
Total Entropy qh-Truhlar (cal/Kmol) = 155.5985  
Total Entropy qh-Grimme (cal/Kmol) = 157.1833  
Esp(RM062X) (a.u.) = -1317.26278359  
Esp(RM062X) gas (a.u.) = -1317.21335566  
Esp(RM062X) gas nuc (a.u.) = -287.774445503  
Esp(RM062X) gas spiro (a.u.) = -1029.34241351

Optimised cartesian coordinates (Angstrom):

O 1.917597 -0.592881 2.126722  
C 1.611285 -0.591019 0.957332  
N 2.457921 -0.558156 -0.131544  
C 3.866111 -0.536342 -0.160177  
C 4.527669 -0.335396 -1.381279  
C 5.919260 -0.307457 -1.420936  
C 6.670263 -0.476309 -0.257446  
C 6.007345 -0.677976 0.952561  
C 4.615252 -0.711606 1.014173  
N 1.759327 -0.524764 -1.336625  
C 0.502800 -0.522382 -1.100415  
C -0.488380 -0.532298 -2.212048  
C 0.174820 -0.636970 0.387871  
O -0.474678 -1.796111 0.711314  
C -1.950065 -0.369426 1.382567  
N -2.749261 -0.941187 0.209190  
H -2.020604 -1.256532 -0.447412  
C -3.464179 -2.180305 0.640355  
C -4.207526 -2.764354 -0.545210  
O -5.108657 -1.830938 -1.088810  
C -4.441421 -0.687088 -1.551154  
C -3.696281 0.019911 -0.429550  
O -2.480381 -0.425055 2.450225  
C -0.696679 0.449520 1.065878  
C -0.896021 1.846841 0.519491  
C -2.026167 2.596212 0.877619  
C -2.191627 3.902206 0.420094  
C -1.221427 4.488408 -0.394155  
C -0.082949 3.760652 -0.736588  
C 0.080988 2.451226 -0.281127  
H 3.943323 -0.204435 -2.289598  
H 6.419661 -0.149897 -2.378287  
H 7.760311 -0.452350 -0.293960  
H 6.578382 -0.815243 1.872773  
H 4.108149 -0.868340 1.962215  
H -1.229018 0.273276 -2.082359  
H -1.015727 -1.500488 -2.236795  
H 0.020150 -0.399181 -3.174895  
H -4.154132 -1.889780 1.440763  
H -2.698301 -2.862611 1.027794  
H -4.783831 -3.636713 -0.212627  
H -3.488259 -3.100352 -1.316847  
H -5.188781 -0.000963 -1.969302  
H -3.728133 -0.953588 -2.354941  
H -4.387317 0.360943 0.353479  
H -3.126291 0.872358 -0.817841  
H -0.258189 0.542884 2.074280  
H -2.786867 2.155131 1.526756  
H -3.080884 4.466170 0.707250  
H -1.348977 5.511189 -0.752479  
H 0.690111 4.212790 -1.360315  
H 0.989832 1.908061 -0.547535

-----  
spiro-TS2-RS\_R

Frequencies, energies and thermodynamic properties:

Lowest Vibrational Mode (1/cm) = -82.6504  
2nd Lowest Vibrational Mode (1/cm) = 13.9111  
E(RM062X) (a.u.) = -1315.79701844  
Thermal correction to Enthalpy (a.u.) = 0.451751  
Thermal correction to Gibbs Free Energy (a.u.) = 0.371846  
Total Entropy (cal/Kmol) = 168.176  
Total Entropy qh-Truhlar (cal/Kmol) = 156.2341  
Total Entropy qh-Grimme (cal/Kmol) = 158.1578  
Esp(RM062X) (a.u.) = -1317.27372088  
Esp(RM062X) gas (a.u.) = -1317.23300290  
Esp(RM062X) gas nuc (a.u.) = -287.773529552  
Esp(RM062X) gas spiro (a.u.) = -1029.33482033

Optimised cartesian coordinates (Angstrom):

O -0.116063 -1.456943 -0.134836  
C -0.602841 -0.611615 0.612937  
N -1.919474 -0.353264 0.810626  
C -3.050272 -0.931765 0.192663  
C -2.924489 -2.046241 -0.650079  
C -4.062800 -2.583203 -1.249571  
C -5.323029 -2.032208 -1.021340  
C -5.439192 -0.926457 -0.178736  
C -4.314601 -0.373100 0.427681  
N -2.122386 0.618626 1.807841  
C -0.982585 1.012172 2.229010  
C -0.809211 1.983383 3.336857  
C 0.195950 0.329439 1.541057  
O 1.081642 -0.302194 2.326209  
C 2.414048 0.676627 0.751310  
N 2.514638 -0.685606 0.094673  
H 1.542861 -1.077338 -0.019349  
C 3.169153 -0.567911 -1.249203  
C 3.296799 -1.950464 -1.865378  
O 4.032889 -2.810765 -1.035969  
C 3.410638 -2.969408 0.216638  
C 3.282155 -1.647248 0.948798  
O 3.442026 1.178963 1.081874  
C 1.050506 1.371079 0.746072  
C 0.572160 2.035173 -0.529967  
C 0.190083 1.326370 -1.679988  
C -0.267733 2.000112 -2.812514  
C -0.356726 3.392003 -2.818098  
C 0.015344 4.108509 -1.681219  
C 0.474320 3.434047 -0.550732  
H -1.947295 -2.485880 -0.829583  
H -3.955594 -3.451074 -1.902831  
H -6.207346 -2.461622 -1.494325  
H -6.417918 -0.482402 0.011839  
H -4.403142 0.489208 1.085060  
H -0.079336 1.562608 4.044170  
H -1.761621 2.180212 3.843644  
H -0.398844 2.933763 2.961673  
H 4.157241 -0.119081 -1.082149  
H 2.565432 0.098158 -1.877961  
H 3.826617 -1.865541 -2.822733  
H 2.289878 -2.366771 -2.061962  
H 4.028909 -3.649731 0.815951  
H 2.411933 -3.430140 0.093413  
H 4.265244 -1.195209 1.131745  
H 2.715733 -1.738561 1.881744  
H 1.230232 2.172409 1.475466  
H 0.241774 0.236935 -1.705748  
H -0.559926 1.429036 -3.695435  
H -0.717174 3.915688 -3.705125  
H -0.051709 5.197778 -1.671732  
H 0.764593 4.001019 0.336850

-----  
spiro-TS2-RS\_S

Frequencies, energies and thermodynamic properties:

Lowest Vibrational Mode (1/cm) = -227.4478  
2nd Lowest Vibrational Mode (1/cm) = 12.4531  
E(RM062X) (a.u.) = -1315.79179678  
Thermal correction to Enthalpy (a.u.) = 0.451506  
Thermal correction to Gibbs Free Energy (a.u.) = 0.370007  
Total Entropy (cal/Kmol) = 171.529  
Total Entropy qh-Truhlar (cal/Kmol) = 157.8337  
Total Entropy qh-Grimme (cal/Kmol) = 160.1951  
Esp(RM062X) (a.u.) = -1317.26759682  
Esp(RM062X) gas (a.u.) = -1317.21402866  
Esp(RM062X) gas nuc (a.u.) = -287.774715981  
Esp(RM062X) gas spiro (a.u.) = -1029.36218281

Optimised cartesian coordinates (Angstrom):

O -0.919467 -0.673995 -2.032983  
C -0.868349 -0.975318 -0.864625  
N -1.934541 -1.173139 -0.001401  
C -3.301955 -0.921089 -0.209224  
C -4.205945 -1.110571 0.848133  
C -5.559981 -0.845610 0.661695  
C -6.035774 -0.387512 -0.567279  
C -5.133329 -0.198390 -1.613404  
C -3.774306 -0.461556 -1.449954  
N -1.523324 -1.695277 1.226648  
C -0.245472 -1.754478 1.242569  
C 0.539256 -2.336497 2.360232  
C 0.388132 -1.143953 0.010756  
O 1.485336 -1.689559 -0.546361  
C 1.950654 0.339313 -0.715160  
N 3.334206 -0.058840 -0.186290  
H 3.126734 -0.841459 0.452708  
C 4.189382 -0.599799 -1.277707  
C 5.537977 -0.987752 -0.699027  
O 6.150698 0.105585 -0.058390  
C 5.372982 0.585153 1.007176  
C 4.013404 1.062579 0.522859  
O 1.912479 0.857655 -1.788091  
C 0.878298 0.320316 0.374998  
C -0.131630 1.430274 0.450273  
C -0.709242 1.701824 1.699032  
C -1.740538 2.631646 1.822766  
C -2.203833 3.311676 0.696425  
C -1.631253 3.052523 -0.549478  
C -0.607374 2.113993 -0.678276  
H -3.835535 -1.462549 1.808577  
H -6.249932 -0.998700 1.493821  
H -7.097641 -0.180348 -0.707588  
H -5.487197 0.159000 -2.582402  
H -3.079321 -0.316066 -2.272244  
H 1.222446 -1.587281 2.790979  
H 1.159753 -3.157453 1.970868  
H -0.122992 -2.715201 3.148427  
H 4.288776 0.193401 -2.028344  
H 3.650584 -1.454811 -1.703375  
H 6.198773 -1.315429 -1.511097  
H 5.416909 -1.829637 0.009249  
H 5.908243 1.424771 1.467848  
H 5.235225 -0.202768 1.772950  
H 4.117090 1.881429 -0.201890  
H 3.380066 1.388250 1.358433  
H 1.386075 0.235624 1.347496  
H -0.347345 1.170348 2.583228  
H -2.181932 2.825550 2.802000  
H -3.010714 4.040786 0.788892  
H -1.990974 3.579657 -1.435115  
H -0.180473 1.895558 -1.656198

-----  
spiro-prod-RR

Frequencies, energies and thermodynamic properties:

Lowest Vibrational Mode (1/cm) = 19.0296  
2nd Lowest Vibrational Mode (1/cm) = 24.2115  
E(RM062X) (a.u.) = -1315.86393967  
Thermal correction to Enthalpy (a.u.) = 0.452861  
Thermal correction to Gibbs Free Energy (a.u.) = 0.370589  
Total Entropy (cal/Kmol) = 173.157  
Total Entropy qh-Truhlar (cal/Kmol) = 159.7973  
Total Entropy qh-Grimme (cal/Kmol) = 162.0030  
Esp(RM062X) (a.u.) = -1317.33385951

Optimised cartesian coordinates (Angstrom):

O 0.326903 2.156157 1.887187  
H 0.024003 2.786095 1.211955  
O 1.268508 1.636981 -0.886565  
O 0.102776 -1.354963 -0.260517  
O -4.421809 -2.640928 -0.941273  
N 2.481805 0.205415 0.489974  
N 2.300316 -0.376048 1.734204  
N -2.057456 -1.758468 0.286154  
C 0.406287 0.891514 1.283004  
C 1.393641 0.958920 0.105135  
C 1.166203 -0.034132 2.209014  
C -1.009559 0.375227 0.938752  
H -1.520463 0.307592 1.910381  
C -0.937298 -0.998458 0.279857  
C -3.357227 -1.389311 0.834302  
H -3.328115 -0.402112 1.305746  
H -3.637638 -2.131512 1.600389  
C -4.397060 -1.398582 -0.279717  
H -5.398207 -1.227249 0.138131  
H -4.168581 -0.585026 -0.995895  
C -3.170975 -2.955391 -1.510121  
H -2.894072 -2.194588 -2.265603  
H -3.272810 -3.926803 -2.012152  
C -2.086793 -3.021035 -0.444077  
H -2.313334 -3.836338 0.262650  
H -1.102192 -3.195274 -0.890140  
C -1.784969 1.354089 0.073133  
C -2.562489 2.348797 0.678530  
H -2.612069 2.401583 1.768891  
C -3.278903 3.259813 -0.099186  
H -3.883739 4.028342 0.385185  
C -3.228348 3.180453 -1.490470  
C -2.454885 2.191262 -2.101186  
H -2.409760 2.126145 -3.189634  
C -1.733899 1.285654 -1.325106  
H -1.116711 0.524007 -1.806935  
C 3.663428 -0.068586 -0.226998  
C 3.892746 0.496991 -1.491029  
H 3.153903 1.159430 -1.933085  
C 5.073648 0.202483 -2.170855  
H 5.240092 0.648238 -3.153333  
C 6.032557 -0.643905 -1.616229  
H 6.953223 -0.867100 -2.157184  
C 5.797306 -1.201585 -0.359218  
H 6.535185 -1.867440 0.092210  
C 4.624542 -0.921442 0.336546  
H 4.442256 -1.358469 1.315934  
C 0.660363 -0.477746 3.533251  
H 0.357872 0.397155 4.127793  
H 1.436254 -1.038402 4.068060  
H -0.225878 -1.120709 3.409934  
H -3.792798 3.888007 -2.100276

-----  
spiro-prod-RS

Frequencies, energies and thermodynamic properties:

Lowest Vibrational Mode (1/cm) = 19.3398  
2nd Lowest Vibrational Mode (1/cm) = 22.0651  
E(RM062X) (a.u.) = -1315.86124153  
Thermal correction to Enthalpy (a.u.) = 0.452812  
Thermal correction to Gibbs Free Energy (a.u.) = 0.370137  
Total Entropy (cal/Kmol) = 174.003  
Total Entropy qh-Truhlar (cal/Kmol) = 160.0499  
Total Entropy qh-Grimme (cal/Kmol) = 162.4744  
Esp(RM062X) (a.u.) = -1317.33208952

Optimised cartesian coordinates (Angstrom):

O 0.309106 -2.358201 1.478301  
H 0.270381 -2.030335 2.391845  
O 1.661164 0.272798 2.039497  
O 0.164835 1.007759 -0.883685  
O -3.913016 3.490196 -0.177404  
N 2.538671 -0.585651 0.056069  
N 2.079497 -1.417900 -0.955844  
N -1.638941 1.882534 0.168163  
C 0.384927 -1.245405 0.619950  
C 1.591381 -0.384835 1.026197  
C 0.875478 -1.769637 -0.716595  
C -0.912046 -0.412118 0.698631  
H -1.002971 -0.170866 1.771546  
C -0.745999 0.894901 -0.072843  
C -2.716769 1.857896 1.149438  
H -2.487164 2.585180 1.946936  
H -2.819419 0.867262 1.603886  
C -4.025401 2.247937 0.474462  
H -4.310393 1.459520 -0.249071  
H -4.821883 2.339412 1.225008  
C -2.910711 3.466830 -1.167632  
H -2.888640 4.459019 -1.637737  
H -3.159304 2.715634 -1.942159  
C -1.553098 3.140439 -0.564765  
H -0.787260 3.044731 -1.341567  
H -1.257465 3.943027 0.132165  
C -2.143102 -1.191000 0.271722  
C -2.709547 -1.017608 -0.996980  
H -2.269511 -0.304701 -1.699448  
C -3.829166 -1.755478 -1.382312  
H -4.257965 -1.608591 -2.375134  
C -4.396563 -2.677598 -0.502854  
C -3.842542 -2.852693 0.765867  
H -4.284971 -3.566192 1.463231  
C -2.726499 -2.111082 1.151569  
H -2.302171 -2.245819 2.147954  
C 3.834274 -0.037320 -0.041352  
C 4.608845 -0.306971 -1.178888  
H 4.198438 -0.932128 -1.968976  
C 5.890782 0.225675 -1.285745  
H 6.482905 0.007533 -2.176433  
C 6.416905 1.028459 -0.273355  
H 7.421851 1.443317 -0.362862  
C 5.640763 1.292965 0.854323  
H 6.036454 1.918903 1.656302  
C 4.355632 0.768471 0.982170  
H 3.759307 0.980765 1.865359  
C 0.130939 -2.707391 -1.597812  
H -0.642794 -2.173106 -2.167301  
H -0.371863 -3.474393 -0.990688  
H 0.825138 -3.183546 -2.301326  
H -5.272901 -3.254560 -0.803106

-----  
 spiro-tet-RR\_R  
 Frequencies, energies and thermodynamic properties:  
 Lowest Vibrational Mode (1/cm) = 23.8670  
 2nd Lowest Vibrational Mode (1/cm) = 26.0521  
 E(RM062X) (a.u.) = -1315.81623477  
 Thermal correction to Enthalpy (a.u.) = 0.452756  
 Thermal correction to Gibbs Free Energy (a.u.) = 0.372364  
 Total Entropy (cal/Kmol) = 169.201  
 Total Entropy qh-Truhlar (cal/Kmol) = 157.4969  
 Total Entropy qh-Grimme (cal/Kmol) = 159.1238  
 Esp(RM062X) (a.u.) = -1317.28747204  
 Esp(RM062X) gas (a.u.) = -1317.25031249  
 Esp(RM062X) gas nuc (a.u.) = -287.776614922  
 Esp(RM062X) gas spiro (a.u.) = -1029.42806291

Optimised cartesian coordinates (Angstrom):

O -0.708141 -1.784268 -0.281690  
 C -0.989353 -0.716183 0.228507  
 N -2.223700 -0.156556 0.407067  
 C -3.492219 -0.658890 0.037205  
 C -3.617891 -1.906691 -0.590970  
 C -4.883579 -2.366790 -0.950746  
 C -6.024237 -1.607627 -0.693519  
 C -5.889036 -0.368706 -0.066908  
 C -4.634050 0.110880 0.299035  
 N -2.154536 1.047954 1.111506  
 C -0.930575 1.332093 1.352808  
 C -0.513196 2.517112 2.146345  
 C 0.005901 0.310099 0.763489  
 O 0.993112 -0.214902 1.618468  
 C 2.072636 0.012952 0.636711  
 N 2.222030 -1.546572 0.005108  
 H 1.288946 -1.849576 -0.314904  
 C 3.182276 -1.546111 -1.115224  
 C 3.456551 -2.966525 -1.582686  
 O 3.911263 -3.770224 -0.522582  
 C 2.964459 -3.835547 0.516441  
 C 2.670068 -2.456100 1.080222  
 O 3.167791 0.415711 1.018701  
 C 1.048444 0.729949 -0.322062  
 C 1.188137 2.200402 -0.612536  
 C 2.179358 3.007816 -0.042296  
 C 2.209936 4.377509 -0.314624  
 C 1.253369 4.957109 -1.146884  
 C 0.264135 4.156250 -1.722253  
 C 0.238575 2.788280 -1.461534  
 H -2.735712 -2.507761 -0.793644  
 H -4.971924 -3.338802 -1.439300  
 H -7.009957 -1.977764 -0.978699  
 H -6.770853 0.239424 0.142468  
 H -4.528360 1.077646 0.786566  
 H 0.308550 2.234513 2.819861  
 H -1.361458 2.898043 2.728130  
 H -0.144569 3.315766 1.484850  
 H 4.097625 -1.073163 -0.734303  
 H 2.777503 -0.934261 -1.933190  
 H 4.237516 -2.955998 -2.354066  
 H 2.538542 -3.399561 -2.025921  
 H 3.378051 -4.476285 1.306032  
 H 2.027058 -4.298879 0.151042  
 H 3.573054 -2.003850 1.512973  
 H 1.882719 -2.491324 1.842937  
 H 0.872970 0.191392 -1.264617  
 H 2.918780 2.551046 0.613995  
 H 2.988785 4.996819 0.134484  
 H 1.278816 6.029003 -1.351168  
 H -0.486759 4.598427 -2.379570  
 H -0.536346 2.163153 -1.914029

-----  
 spiro-tet-RS\_R  
 Frequencies, energies and thermodynamic properties:  
 Lowest Vibrational Mode (1/cm) = 22.2416  
 2nd Lowest Vibrational Mode (1/cm) = 25.5032  
 E(RM062X) (a.u.) = -1315.81225293  
 Thermal correction to Enthalpy (a.u.) = 0.452620  
 Thermal correction to Gibbs Free Energy (a.u.) = 0.371597  
 Total Entropy (cal/Kmol) = 170.526  
 Total Entropy qh-Truhlar (cal/Kmol) = 158.2399  
 Total Entropy qh-Grimme (cal/Kmol) = 160.0793  
 Esp(RM062X) (a.u.) = -1317.28435345  
 Esp(RM062X) gas (a.u.) = -1317.24682809  
 Esp(RM062X) gas nuc (a.u.) = -287.776590530  
 Esp(RM062X) gas spiro (a.u.) = -1029.41730018

Optimised cartesian coordinates (Angstrom):

O -0.534848 -1.063222 -0.663435  
 C -0.960973 -0.448092 0.295797  
 N -2.260559 -0.121266 0.569706  
 C -3.421608 -0.395311 -0.189982  
 C -3.324644 -0.860097 -1.509588  
 C -4.489294 -1.113883 -2.232396  
 C -5.745885 -0.910082 -1.663984  
 C -5.831812 -0.443653 -0.352138  
 C -4.680975 -0.185037 0.387877  
 N -2.402300 0.480418 1.822464  
 C -1.250175 0.601833 2.362545  
 C -1.031881 1.159904 3.720206  
 C -0.144442 0.111639 1.465105  
 O 0.741630 -0.831465 2.028708  
 C 1.946971 -0.136744 1.495235  
 N 2.205068 -1.038864 0.087932  
 H 1.390635 -0.923899 -0.534380  
 C 3.447623 -0.611334 -0.588813  
 C 3.778882 -1.537978 -1.747711  
 O 3.877032 -2.875196 -1.327126  
 C 2.670417 -3.311960 -0.751680  
 C 2.292846 -2.471984 0.454844  
 O 2.974709 -0.088133 2.159510  
 C 1.013740 1.085631 1.145066  
 C 1.152741 1.933458 -0.084713  
 C 2.362101 2.630442 -0.247834  
 C 2.573573 3.446391 -1.354782  
 C 1.569793 3.596170 -2.315744  
 C 0.356900 2.932583 -2.149831  
 C 0.146725 2.108473 -1.040550  
 H -2.350554 -1.025227 -1.962039  
 H -4.404835 -1.475827 -3.258601  
 H -6.650946 -1.112252 -2.238436  
 H -6.807289 -0.277325 0.108310  
 H -4.747600 0.180957 1.410278  
 H -0.426680 0.455104 4.309177  
 H -1.992140 1.334958 4.219459  
 H -0.475183 2.107266 3.663919  
 H 4.235811 -0.632881 0.175461  
 H 3.322998 0.417325 -0.945680  
 H 4.746596 -1.249324 -2.178404  
 H 3.007901 -1.440751 -2.536991  
 H 2.803851 -4.357095 -0.443221  
 H 1.853766 -3.274664 -1.499390  
 H 3.056048 -2.545250 1.242756  
 H 1.324585 -2.780331 0.863089  
 H 1.135241 1.726485 2.031788  
 H 3.144339 2.514840 0.506956  
 H 3.522711 3.973699 -1.466182  
 H 1.731228 4.237809 -3.183542  
 H -0.441493 3.057331 -2.883360  
 H -0.826368 1.628951 -0.924508

## 9. References

- [1] a) A. Krasovskiy, P. Knochel, *Synthesis* **2006**, *2006*, 890-891; b) A. F. Burchat, J. M. Chong, N. Nielsen, *J. Organomet. Chem.* **1997**, *542*, 281-283.
- [2] *Pure Appl. Chem.* **1974**, *37*, 445-462.
- [3] W. C. Still, M. Kahn, A. Mitra, *J. Org. Chem.* **1978**, *43*, 2923-2925.
- [4] a) G. R. Fulmer, A. J. M. Miller, N. H. Sherden, H. E. Gottlieb, A. Nudelman, B. M. Stoltz, J. E. Bercaw, K. I. Goldberg, *Organometallics* **2010**, *29*, 2176-2179; b) H. E. Gottlieb, V. Kotlyar, A. Nudelman, *J. Org. Chem.* **1997**, *62*, 7512-7515; c) R. K. Harris, E. D. Becker, S. M. Cabral de Menezes, P. Granger, R. E. Hoffman, K. W. Zilm, *Pure Appl. Chem.* **2008**, *80*, 59-84; d) R. K. Harris, E. D. Becker, S. M. Cabral de Menezes, R. Goodfellow, P. Granger, *Pure Appl. Chem.* **2001**, *73*, 1795-1818.
- [5] a) *Pure Appl. Chem.* **1976**, *45*, 217-220; b) *Pure Appl. Chem.* **1972**, *29*, 625-628; c) R. K. Harris, J. Kowalewski, S. M. Cabral de Menezes, *Pure Appl. Chem.* **1997**, *69*, 2489-2496.
- [6] a) T. R. Hoye, H. Zhao, *J. Org. Chem.* **2002**, *67*, 4014-4016; b) T. R. Hoye, P. R. Hanson, J. R. Vyvyan, *J. Org. Chem.* **1994**, *59*, 4096-4103.
- [7] a) K. K. Murray, R. K. Boyd, M. N. Eberlin, G. J. Langley, L. Li, Y. Naito, *Pure Appl. Chem.* **2013**, *85*, 1515-1609; b) J. F. J. Todd, *Pure Appl. Chem.* **1991**, *63*, 1541-1566.
- [8] a) H. A. Favre, W. H. Powell, *Nomenclature of Organic Chemistry: IUPAC Recommendations and Preferred Names 2013*, Royal Society of Chemistry, Cambridge, UK, **2014**; b) M. A. Brimble, D. S. Black, R. Hartshorn, A. P. Rauter, C.-K. Sha, L. K. Sydnes, *Pure Appl. Chem.* **2013**, *85*, 307-313; c) W. Mormann, K.-H. Hellwich, *Pure Appl. Chem.* **2008**, *80*, 201-232; d) J. Brecher, *Pure Appl. Chem.* **2008**, *80*, 277-410; e) J. Brecher, *Pure Appl. Chem.* **2006**, *78*, 1897-1970; f) G. P. Moss, *Pure Appl. Chem.* **1999**, *71*, 531-558; g) H. A. Favre, K.-H. Hellwich, G. P. Moss, W. H. Powell, J. G. Trynham, *Pure Appl. Chem.* **1999**, *71*, 1327-1330; h) G. P. Moss, *Pure Appl. Chem.* **1998**, *70*, 143-216; i) G. P. Moss, *Pure Appl. Chem.* **1996**, *68*, 2193-2222; j) W. H. Powell, *Pure Appl. Chem.* **1993**, *65*, 1357-1455; k) W. Drenth, *Pure Appl. Chem.* **1992**, *64*, 989-990; l) G. P. Moss, *Pure Appl. Chem.* **1989**, *61*, 1783-1822; m) J. S. Littler, *Pure Appl. Chem.* **1989**, *61*, 57-81; n) R. A. Y. Jones, J. F. Bunnett, *Pure Appl. Chem.* **1989**, *61*, 725-768; o) R. D. Guthrie, *Pure Appl. Chem.* **1989**, *61*, 23-56; p) W. H. Powell, *Pure Appl. Chem.* **1988**, *60*, 1395-1401; q) J. F. Bunnett, R. A. Y. Jones, *Pure Appl. Chem.* **1988**, *60*, 1115-1116; r) G. P. Moss, *Pure Appl. Chem.* **1987**, *59*, 779-832; s) N. Lozac'h, *Pure Appl. Chem.* **1986**, *58*, 1693-1696; t) W. H. Powell, *Pure Appl. Chem.* **1984**, *56*, 769-778; u) *Pure Appl. Chem.* **1984**, *56*, 595-624; v) W. H. Powell, *Pure Appl. Chem.* **1983**, *55*, 409-416; w) J. E. Merritt, K. L. Loening, *Pure Appl. Chem.* **1983**, *55*, 2251-2304; x) N. Lozac'h, *Pure Appl. Chem.* **1983**, *55*, 1463-1466; y) W. H. Powell, *Pure Appl. Chem.* **1982**, *54*, 217-228; z) *Pure Appl. Chem.* **1982**, *54*, 211-216; aa) *Pure Appl. Chem.* **1982**, *54*, 207-210; ab) J. F. Bunnett, *Pure Appl. Chem.* **1981**, *53*, 305-322; ac) *Pure Appl. Chem.* **1981**, *53*, 1901-1905; ad) *Pure Appl. Chem.* **1979**, *51*, 1995-2003; ae) *Pure Appl. Chem.* **1979**, *51*, 353-380; af) L. C. Cross, W. Klyne, *Pure Appl. Chem.* **1976**, *45*, 11-30; ag) *Pure Appl. Chem.* **1974**, *40*, 315-332; ah) *Pure Appl. Chem.* **1972**, *31*, 283-322; ai) *Pure Appl. Chem.* **1972**, *31*, 639-646; aj) *Pure Appl. Chem.* **1971**, *28*, 1-110; ak) *Pure Appl. Chem.* **1965**, *11*, 1-260.
- [9] L. C. Morrill, L. A. Ledingham, J.-P. Couturier, J. Bickel, A. D. Harper, C. Fallan, A. D. Smith, *Org. Biomol. Chem.* **2014**, *12*, 624-636.
- [10] D. G. Stark, L. C. Morrill, D. B. Cordes, A. M. Z. Slawin, T. J. C. O'Riordan, A. D. Smith, *Chem. Asian J.* **2016**, *11*, 395-400.
- [11] J. A. King, F. H. McMillan, *J. Am. Chem. Soc.* **1951**, *73*, 4911-4915.
- [12] A. A. M. Roof, H. F. van Woerden, H. Cerfontain, *Tetrahedron* **1976**, *32*, 2967-2971.
- [13] C. Rüchardt, O. Krätz, S. Eichler, *Chem. Ber.* **1969**, *102*, 3922-3946.
- [14] Y. Abdelhamid, K. Kasten, J. Dunne, W. C. Hartley, C. M. Young, D. B. Cordes, A. M. Z. Slawin, S. Ng, A. D. Smith, *Org. Lett.* **2022**, *24*, 5444-5449.

- [15] D.-J. Barrios Antúnez, M. D. Greenhalgh, A. C. Brueckner, D. M. Walden, P. Elías-Rodríguez, P. Roberts, B. G. Young, T. H. West, A. M. Z. Slawin, P. Ha-Yeon Cheong, A. D. Smith, *Chem. Sci.* **2019**, *10*, 6162-6173.
- [16] H. Sharghi, J. Aboonajmi, M. Mozaffari, M. M. Doroodmand, M. Aberi, *Appl. Organomet. Chem.* **2018**, *32*, e4124.
- [17] Y.-Y. Huang, H.-C. Lin, K.-M. Cheng, W.-N. Su, K.-C. Sung, T.-P. Lin, J.-J. Huang, S.-K. Lin, F. F. Wong, *Tetrahedron* **2009**, *65*, 9592-9597.
- [18] A. L. Nivorozhkin, M. S. Korobov, L. E. Konstantinovskii, L. E. Nivorozhkin, V. I. Minkin, *J. Gen. Chem.* **1985**, *55*, 757-768.
- [19] J. P. Phelan, J. A. Ellman, *Adv. Synth. Catal.* **2016**, *358*, 1713-1718.
- [20] S. Fuse, M. Inaba, S. Sato, M. Joshi, H. Nakamura, *Synthesis* **2018**, *50*, 1493-1498.
- [21] a) A. Kimata, H. Nakagawa, R. Ohyama, T. Fukuuchi, S. Ohta, T. Suzuki, N. Miyata, *J. Med. Chem.* **2007**, *50*, 5053-5056; b) S. Zhou, J. Ren, M. Liu, L. Ren, Y. Liu, P. Gong, *Bioorg. Chem.* **2014**, *57*, 30-42.
- [22] F. Marchetti, C. Pettinari, A. Cingolani, L. Brocanelli, M. Rossi, F. Caruso, *J. Organomet. Chem.* **1999**, *580*, 344-353.
- [23] S. Mahajan, P. Chauhan, U. Kaya, K. Deckers, K. Rissanen, D. Enders, *Chem. Commun.* **2017**, *53*, 6633-6636.
- [24] P. Chauhan, S. Mahajan, U. Kaya, A. Peuronen, K. Rissanen, D. Enders, *J. Org. Chem.* **2017**, *82*, 7050-7058.
- [25] R.-H. Wang, Y.-L. Li, H.-J. He, Y.-C. Xiao, F.-E. Chen, *Chem. Eur. J.* **2021**, *27*, 4302-4306.
- [26] a) *CrystalClear-SM Expert*, v2.1.: Rigaku Americas, *The Woodlands, Texas, USA*, and Rigaku Corporation, *Tokyo, Japan*, **2015**; b) *CrysAlisPro*, v1.171.42.49, v1.171.42.82a, v1.171.42.93a: Rigaku Oxford Diffraction, Rigaku Corporation, *Oxford, U.K.*, **2020-2023**.
- [27] G. Sheldrick, *Acta Crystallogr. A* **2015**, *71*, 3-8.
- [28] G. Sheldrick, *Acta Crystallogr. C* **2015**, *71*, 3-8.
- [29] O. V. Dolomanov, L. J. Bourhis, R. J. Gildea, J. A. K. Howard, H. Puschmann, *J. Appl. Crystallogr.* **2009**, *42*, 339-341.
- [30] Y. Zhao, D. G. Truhlar, *Theor. Chem. Acc.* **2008**, *120*, 215-241.
- [31] a) A. Schäfer, H. Horn, R. Ahlrichs, *J. Chem. Phys.* **1992**, *97*, 2571-2577; b) A. Schäfer, C. Huber, R. Ahlrichs, *J. Chem. Phys.* **1994**, *100*, 5829-5835; c) F. Weigend, *Phys. Chem. Chem. Phys.* **2006**, *8*, 1057-1065; d) F. Weigend, R. Ahlrichs, *Phys. Chem. Chem. Phys.* **2005**, *7*, 3297-3305.
- [32] A. V. Marenich, C. J. Cramer, D. G. Truhlar, *J. Phys. Chem. B* **2009**, *113*, 6378-6396.
- [33] G. Luchini, J. Alegre-Requena, I. Funes-Ardoiz, R. Paton, *F1000Research* **2020**, *9*.
- [34] R. F. Ribeiro, A. V. Marenich, C. J. Cramer, D. G. Truhlar, *J. Phys. Chem. B* **2011**, *115*, 14556-14562.
- [35] R. L. Martin, P. J. Hay, L. R. Pratt, *J. Phys. Chem. A* **1998**, *102*, 3565-3573.
- [36] M. J. Frisch, G. W. Trucks, H. B. Schlegel, G. E. Scuseria, M. A. Robb, J. R. Cheeseman, G. Scalmani, V. Barone, G. A. Petersson, H. Nakatsuji, X. Li, M. Caricato, A. V. Marenich, J. Bloino, B. G. Janesko, R. Gomperts, B. Mennucci, H. P. Hratchian, J. V. Ortiz, A. F. Izmaylov, J. L. Sonnenberg, Williams, F. Ding, F. Lipparini, F. Egidi, J. Goings, B. Peng, A. Petrone, T. Henderson, D. Ranasinghe, V. G. Zakrzewski, J. Gao, N. Rega, G. Zheng, W. Liang, M. Hada, M. Ehara, K. Toyota, R. Fukuda, J. Hasegawa, M. Ishida, T. Nakajima, Y. Honda, O. Kitao, H. Nakai, T. Vreven, K. Throssell, J. A. Montgomery Jr., J. E. Peralta, F. Ogliaro, M. J. Bearpark, J. J. Heyd, E. N. Brothers, K. N. Kudin, V. N. Staroverov, T. A. Keith, R. Kobayashi, J. Normand, K. Raghavachari, A. P. Rendell, J. C. Burant, S. S. Iyengar, J. Tomasi, M. Cossi, J. M. Millam, M. Klene, C. Adamo, R. Cammi, J. W. Ochterski, R. L. Martin, K. Morokuma, O. Farkas, J. B. Foresman, D. J. Fox *Gaussian 16 Rev. C.01*: Wallingford, CT, **2016**.
- [37] C. Y. Legault *CYLVIEW20*, Build 0001; Université de Sherbrooke: Sherbrooke, Canada, **2020**.
- [38] R. A. Boto, F. Peccati, R. Laplaza, C. Quan, A. Carbone, J.-P. Piquemal, Y. Maday, J. Contreras-García, *J. Chem. Theory Comput.* **2020**, *16*, 4150-4158.

- [39] a) C. Wang, S.-J. Li, Q.-C. Zhang, D. Wei, L. Ding, *Catal. Sci. Technol.* **2020**, *10*, 3664-3669; b) J. Wu, C. M. Young, A. A. Watts, A. M. Z. Slawin, G. R. Boyce, M. Bühl, A. D. Smith, *Org. Lett.* **2022**, *24*, 4040-4045.
- [40] F. M. Bickelhaupt, K. N. Houk, *Angew. Chem. Int. Ed.* **2017**, *56*, 10070-10086.
- [41] S. Grimme, *Chem. Eur. J.* **2012**, *18*, 9955-9964.
